# Supplementary material
Source: Research Square preprint supplement (doi:10.21203/rs.3.rs-9805857/v1)
Supplement: Supplementary file 1 [file 49d41e2a426ced9f70b0a108.xlsx]

## Sheet: Overview
Table S4 Composition of eight mixed communities and species acquisition status of the strategy of imaging-based deduplication followed by Raman analysis
	Mixture 1	Mixture 2	Mixture 3	Mixture 4	Mixture 5	Mixture 6	Mixture 7	Mixture 8
Christensenella minuta	0.0588235	0.0618557	0.0670391	0.0745342	0.0867993	0.115246	0.179272	0.195791
Faecalicatena contorta	0.0588235	0.0618557	0.0558659	0.0310559	0.0180832	0.0120048	0.00933707	0.00914913
Bacteroides uniformis	0.0588235	0.0618557	0.0670391	0.0745342	0.0867993	0.060024	0.0466853	0.0457457
Shigella flexneri	0.0588235	0.0618557	0.0670391	0.0745342	0.0867993	0.057623	0.0448179	0.0439158
Enterocloster bolteae	0.0588235	0.0618557	0.0670391	0.0745342	0.0867993	0.0996399	0.0774977	0.0759378
Ligilactobacillus salivarius	0.0588235	0.0618557	0.0670391	0.0745342	0.0470163	0.0312125	0.0242764	0.0237877
Lactococcus lactis	0.0588235	0.0618557	0.0670391	0.0745342	0.0867993	0.115246	0.147526	0.144556
Clostridium paraputrificum	0.0588235	0.0618557	0.0335196	0.0186335	0.0108499	0.00720288	0.00560224	0.00548948
Paraclostridium benzoelyticum	0.0588235	0.0309278	0.0167598	0.00931677	0.00542495	0.00360144	0.00280112	0.00274474
Enterococcus faecalis	0.0588235	0.0618557	0.0670391	0.0745342	0.0867993	0.115246	0.118581	0.116194
Klebsiella pneumoniae	0.0588235	0.0618557	0.0670391	0.0745342	0.0867993	0.0612245	0.047619	0.0466606
Luoshenia tenuis	0.0588235	0.0618557	0.0670391	0.0434783	0.0253165	0.0168067	0.0130719	0.0128088
Bacteroides fragilis	0.0588235	0.0618557	0.0670391	0.0652174	0.0379747	0.0252101	0.0196078	0.0192132
Ruminococcus gnavus	0.0588235	0.0618557	0.0670391	0.0745342	0.0867993	0.115246	0.114846	0.112534
Blautia argi	0.0588235	0.0412371	0.0223464	0.0124224	0.00723327	0.00480192	0.00373483	0.00365965
Streptococcus constellatus	0.0588235	0.0618557	0.0670391	0.0745342	0.0669078	0.0444178	0.0345472	0.0338518
Streptococcus parasanguinis	0.0588235	0.0618557	0.0670391	0.0745342	0.0867993	0.115246	0.110177	0.10796
Black indicates successfully isolated species and gray indicates missing species

## Sheet: Mixture 1
Table S4 Colony information of Mixture1
index	x_micro	y_micro	nWidth	nHeight	Feature1	Feature2	Feature3	Feature4	Feature5	Feature6	Feature7	Feature8	Feature9	Feature10	Feature11	Feature12	Feature13	Feature14	Feature15	Feature16	Feature17	Feature18	Feature19	Feature20	Feature21	Feature22	Raman0	Raman1	Raman2	Raman3	Raman4	Raman5	Raman6	Raman7	Raman8	Raman9	Raman10	Raman11	Raman12	Raman13	Raman14	Raman15	Raman16	Raman17	Raman18	Raman19	Raman20	Raman21	Raman22
888	266	264	420	422	0.726209	10846	1.01629	3.28713	-0.010101	120.419	414.483	0.193528	1530.33	30.2978	0.0342246	0.00892135	0.634143	7.95905e-05	1495.63	29.9426	0.0344859	0.00895089	0.64209	8.01184e-05	0.392118	0.296463	0.181748	0.179246	0.177306	0.194729	0.183521	0.171817	0.178331	0.20291	0.177819	0.180605	0.213618	0.266259	0.215583	0.203807	0.205077	0.207399	0.180453	0.196321	0.221255	0.195442	0.180378	0.230302	0.254309
1076	262	261	415	416	0.736233	9997	1.01414	3.7963	-0.00943396	114.178	409.872	0.306892	1426.81	29.3861	0.03476	0.00906107	0.717485	8.2103e-05	1424.23	29.4145	0.0355216	0.00907501	0.717812	8.23559e-05	0.744781	0.860543	0.132144	0.15565	0.189461	0.17946	0.15937	0.156863	0.179179	0.19819	0.183693	0.161588	0.1647	0.195818	0.181052	0.150997	0.137575	0.175436	0.186695	0.173615	0.138397	0.130511	0.126993	0.190087	0.216979
945	279	278	409	408	0.747184	8779	1.01305	3.53271	-0.0666667	124.468	380.808	0.101378	1566.03	30.5484	0.033741	0.0090624	0.625465	8.2127e-05	1514.02	30.2138	0.0338348	0.00909292	0.637308	8.26812e-05	0.763683	0.872735	0.140198	0.165545	0.19762	0.268111	0.211009	0.130352	0.117213	0.198029	0.206352	0.169485	0.166543	0.215181	0.213802	0.232148	0.299538	0.328197	0.278311	0.253895	0.283834	0.229951	0.207857	0.233124	0.270002
181	1091	1087	1728	1722	0.655706	1599503	1.01546	3.65199	0.000723066	48.8714	333.756	0.959672	70.8507	6.14717	0.172712	0.0503383	0.544192	0.00253395	70.2737	6.12238	0.173688	0.0504164	0.547946	0.00254182	0.2366	0.80323	0.079126	0.095573	0.076328	0.075051	0.081963	0.088803	0.101667	0.137015	0.117344	0.092279	0.084532	0.118489	0.126287	0.135636	0.130309	0.096802	0.072321	0.11022	0.157325	0.159133	0.124617	0.119283	0.107207
174	1117	1121	1644	1629	0.723625	1389280	1.00331	3.60537	0.00158103	42.0965	264.295	0.976797	84.4977	6.78318	0.158393	0.0447442	0.600944	0.00200205	84.5284	6.75864	0.159009	0.0448105	0.600839	0.00200798	0.481026	0.30865	0.113726	0.104418	0.106268	0.154271	0.153566	0.140259	0.178429	0.225876	0.187801	0.150927	0.168505	0.208188	0.204225	0.213971	0.212561	0.143968	0.102974	0.166951	0.249999	0.229015	0.183311	0.174956	0.163791
178	516	524	787	763	0.654784	170600	1.05886	3.63288	-0.00226244	61.4792	708.452	0.871263	672.79	19.6186	0.0563699	0.0143053	0.573345	0.000204642	664.884	19.5253	0.0566986	0.0143141	0.578609	0.000204894	0.186904	0.261121	0.112558	0.122732	0.122535	0.120601	0.135818	0.133699	0.143387	0.172343	0.137708	0.105468	0.112883	0.155214	0.134381	0.12662	0.135366	0.111996	0.086975	0.13153	0.185362	0.190739	0.145471	0.127744	0.092815
341	263	264	410	409	0.658602	9861	1.00073	3.20635	-0.0645161	142.638	252.369	0.00010141	967.981	24.3145	0.0417873	0.0118367	0.407849	0.000140108	977.689	24.3487	0.0427338	0.0118132	0.401138	0.000139552	0.980582	0.0216027	0.117236	0.098063	0.120268	0.163988	0.179977	0.158199	0.137659	0.158175	0.160387	0.127535	0.144891	0.168884	0.186562	0.160195	0.150451	0.106857	0.119293	0.148846	0.161943	0.136598	0.113843	0.091084	0.095465
367	263	262	411	410	0.702223	9616.5	1.00478	3.56989	-0.0769231	136.95	212.216	0	1940.44	34.5655	0.02884	0.00888201	0.425285	7.88901e-05	1914.56	34.3428	0.0282161	0.00892186	0.432391	7.95996e-05	0.236462	0.268314	0.176655	0.262861	0.203373	0.154933	0.128464	0.181433	0.190948	0.256553	0.239075	0.181608	0.163502	0.178647	0.199348	0.174703	0.187008	0.188871	0.161859	0.144942	0.142162	0.180997	0.147097	0.091109	0.067896
358	269	269	421	419	0.731544	10742	1.00521	3.62857	-0.00970874	134.629	294.634	0.000930925	1962.52	34.6868	0.0302928	0.00858687	0.521586	7.37343e-05	1954.93	34.5326	0.0311668	0.00862227	0.523233	7.43436e-05	0.191007	0.391699	0.184519	0.20831	0.205741	0.203631	0.164501	0.146446	0.161753	0.216264	0.2141	0.18436	0.152126	0.125972	0.152352	0.199944	0.231039	0.205483	0.190918	0.214661	0.202009	0.185999	0.141073	0.138842	0.118476
95	1034	1008	1257	1248	0.130013	556689	1.75538	3.66289	0.00252366	112.521	451.776	0.286666	186.441	10.5815	0.0934434	0.0297527	0.223723	0.000885223	184.34	10.5274	0.0937989	0.0297837	0.232813	0.000887066	0.721184	0.852417	0.074341	0.111562	0.126221	0.125291	0.108397	0.083486	0.068559	0.084039	0.086772	0.099199	0.110052	0.093519	0.068957	0.082244	0.103382	0.093958	0.069481	0.109284	0.115738	0.118565	0.053766	0.075468	0.082032
191	974	948	1357	1319	0.138375	661949	1.08452	3.70029	0.003544	92.8478	503.08	0.554884	658.615	20.0634	0.0511447	0.015537	0.15275	0.000241399	654.789	20.0071	0.0510863	0.0155518	0.157109	0.000241859	0.453089	0.831168	0.129484	0.140409	0.128664	0.116991	0.119598	0.123101	0.14655	0.169286	0.150199	0.123288	0.129511	0.145504	0.141029	0.14758	0.16708	0.125105	0.096742	0.121358	0.160712	0.14745	0.120719	0.111453	0.077714
94	1117	1186	1263	1253	0.154578	503289	1	3.7564	-0.0014652	111.197	385.653	0.289543	484.639	17.2632	0.0583785	0.0181791	0.130108	0.000330478	480.842	17.2047	0.058412	0.0181941	0.136808	0.000331026	0.0163925	0.0780861	0.135055	0.162704	0.177788	0.164348	0.135751	0.083205	0.095621	0.141084	0.173487	0.191414	0.203308	0.162009	0.110132	0.144841	0.160775	0.161223	0.104295	0.157766	0.182556	0.195938	0.070889	0.069937	0.110277
258	293	295	472	468	0.545496	22630.5	2.44867	3.59884	0.0352941	128.355	303.763	0.035704	1878.22	33.9643	0.0309576	0.00905564	0.207731	8.20045e-05	1863.45	33.9574	0.0297081	0.00905037	0.212561	8.19091e-05	0.422543	0.455818	0.032206	0.040681	0.070527	0.102895	0.111676	0.094415	0.091184	0.098785	0.107025	0.099157	0.095792	0.088147	0.089591	0.087614	0.108682	0.091195	0.067379	0.060567	0.076853	0.072628	0.082019	0.091129	0.070463
228	276	277	428	426	0.667171	15136.5	6.62577	3.69421	-0.0588235	133.543	279.045	0.000660655	824.33	22.4596	0.0453041	0.0125206	0.345816	0.000156766	858.57	22.9013	0.0449216	0.0124522	0.317718	0.000155056	0.927455	0.707929	0.06198	0.082287	0.085964	0.092241	0.085099	0.084527	0.080596	0.086837	0.07849	0.080122	0.084227	0.081172	0.072457	0.069597	0.082123	0.074344	0.058446	0.067578	0.078903	0.078549	0.085226	0.104322	0.071773
250	341	340	518	524	0.599296	35900.5	1.16736	3.51643	0.014218	107.967	405.953	0.390357	1938.48	34.3232	0.0305859	0.0083416	0.340914	6.95823e-05	1926.78	34.3453	0.0300619	0.00833263	0.344043	6.94326e-05	0.273842	0.888658	0.047691	0.073928	0.086046	0.087491	0.090368	0.087816	0.08495	0.084442	0.081161	0.081835	0.090634	0.090425	0.076956	0.088743	0.106181	0.086123	0.04997	0.063823	0.087619	0.086571	0.084581	0.081823	0.053894
207	455	453	800	805	0.827964	197424	1.01296	3.41649	-0.00424628	55.1316	248.308	0.96485	402.516	14.1584	0.0841528	0.0229241	0.888084	0.000525515	392.781	14.0214	0.0849217	0.0229621	0.89096	0.000527259	0.61766	0.0514655	0.107364	0.126522	0.101894	0.109074	0.117307	0.117493	0.129916	0.149378	0.119945	0.08972	0.132067	0.15926	0.156246	0.138479	0.157005	0.112942	0.082003	0.097545	0.128568	0.128678	0.099334	0.090402	0.056855
215	326	324	537	538	0.825413	43563	2.02799	3.42424	0	58.3518	361.965	0.943232	543.884	16.6897	0.0732473	0.0181399	0.902032	0.000329055	540.13	16.6214	0.0738423	0.0181774	0.902925	0.000330419	0.296902	0.542415	0.123289	0.123789	0.130313	0.181851	0.17113	0.166342	0.179173	0.24944	0.208242	0.154789	0.141453	0.178073	0.168964	0.174963	0.202545	0.163321	0.098575	0.147796	0.208862	0.208647	0.142189	0.13582	0.077239
199	373	373	543	531	0.848284	43576.5	1.06052	3.71698	-0.00952381	52.0491	414.643	0.950788	430.642	15.3355	0.0740409	0.019311	0.880548	0.000372913	418.003	15.1223	0.0749919	0.0193588	0.884262	0.000374763	0.0434181	0.938072	0.148659	0.160915	0.149475	0.174143	0.206968	0.20581	0.223625	0.252468	0.197661	0.163571	0.183914	0.25635	0.219727	0.206888	0.224306	0.179765	0.11973	0.154434	0.261671	0.243217	0.184503	0.141049	0.097706
717	2570	2564	952	859	0.524533	284880	3.26105	3.80775	0.00972447	89.0853	805.382	0.685631	339.781	14.0272	0.0758512	0.0206188	0.433846	0.000425136	331.65	13.8294	0.0767073	0.0207079	0.446875	0.000428817	0.248624	0.774779	0.083001	0.105122	0.109643	0.102179	0.088974	0.07439	0.078956	0.102879	0.114868	0.110547	0.109369	0.095489	0.082721	0.07816	0.09733	0.111016	0.101531	0.090889	0.09677	0.096002	0.081889	0.068616	0.074628
511	373	375	575	573	0.654929	49112.5	1.91087	3.58796	0	70.631	677.321	0.816228	1891.11	33.5019	0.0323904	0.00804589	0.38854	6.47364e-05	1889.52	33.4238	0.0331644	0.00805791	0.388783	6.49299e-05	0.645823	0.688207	0.101927	0.107875	0.156005	0.195421	0.175603	0.146069	0.159792	0.167842	0.12555	0.130824	0.188184	0.194864	0.18439	0.177543	0.249582	0.216462	0.175484	0.150302	0.224191	0.205661	0.152698	0.147494	0.145615
723	2587	2579	864	881	0.407917	231372	1.15105	3.70787	0.00161031	75.3503	1100.36	0.839421	620.128	19.0011	0.0569823	0.0151654	0.401333	0.000229989	605.49	18.8262	0.0569124	0.0152014	0.415489	0.000231083	0.520718	0.3161	0.125616	0.140206	0.138302	0.147399	0.122523	0.105543	0.106462	0.132825	0.105255	0.11431	0.133877	0.138773	0.115696	0.121421	0.13654	0.14388	0.134343	0.137779	0.164084	0.172043	0.128736	0.085699	0.079635
0	1051	1090	1566	1525	0.158344	1044236	1.02618	3.69227	0.00104603	64.1701	201.635	1.25599	767.923	21.5184	0.0480158	0.0145187	0.188529	0.000210794	761.047	21.4169	0.0484319	0.0145371	0.195535	0.000211327	0.242962	0.490575	0.099481	0.103026	0.103594	0.10334	0.10319	0.093415	0.079446	0.062334	0.101152	0.171387	0.238868	0.239952	0.169	0.126621	0.139962	0.151244	0.111571	0.095259	0.109363	0.145592	0.116978	0.071596	0.06074
1	636	633	1170	1207	0.190914	354150	1.05969	3.75619	0.0019084	59.6887	156.23	1.93476	1131.81	26.2236	0.0395833	0.0121207	0.141525	0.000146913	1105.16	25.8916	0.0401393	0.0121587	0.161	0.000147834	0.465148	0.253557	0.150008	0.157544	0.150398	0.185996	0.230422	0.178416	0.144337	0.117125	0.132993	0.136076	0.158844	0.176265	0.177963	0.162319	0.134396	0.12854	0.148239	0.15753	0.136497	0.101977	0.058876	0.055169	0.09098
5	619	605	955	992	0.208722	253048	1	3.77053	0.0011274	61.6165	221.101	1.53071	1498.3	30.2145	0.0337676	0.0104873	0.146892	0.000109984	1482.82	30.0622	0.0344197	0.0105024	0.15496	0.000110301	0.525712	0.817644	0.123641	0.142992	0.154064	0.174921	0.172259	0.128237	0.08523	0.062717	0.073633	0.094276	0.124434	0.177881	0.138722	0.153544	0.128174	0.143577	0.109057	0.143469	0.14794	0.136184	0.059358	0	0.055856
6	1190	1355	2194	2539	0.529492	3250160	1.17437	3.56199	-0.00136861	59.577	246.879	0.956082	131.214	8.36623	0.127432	0.0382738	0.521214	0.00146489	129.32	8.31878	0.128071	0.038331	0.528049	0.00146927	0.446248	0.0274294	0.093223	0.102087	0.113445	0.132008	0.135503	0.07949	0.035805	0.063501	0.111282	0.163047	0.179052	0.18147	0.153372	0.145446	0.111506	0.063891	0.046576	0.073966	0.090167	0.086332	0.06356	0.05875	0.072859
7	1781	1830	2445	2744	0.381136	4.18311e+06	1.11091	3.58141	0.000366166	98.5188	187.227	0.729168	111.486	8.15896	0.120041	0.0379414	0.238778	0.00143955	110.453	8.12443	0.120475	0.0379767	0.245849	0.00144223	0.663393	0.916014	0.066056	0.090333	0.113495	0.156608	0.154606	0.106474	0.033771	0.04754	0.092965	0.122328	0.109787	0.112678	0.120873	0.127477	0.098446	0.062964	0.060427	0.106396	0.136863	0.129135	0.070399	0.05812	0.098666
8	1922	2148	3021	2555	0.337819	4691419	2.65519	3.62892	0.0015868	63.4903	670.479	0.816672	123.829	8.4016	0.124313	0.0360099	0.371509	0.00129671	122.006	8.35182	0.124821	0.0360719	0.380758	0.00130118	0.549413	0.338188	0.098961	0.116376	0.115085	0.116999	0.111244	0.077984	0.066213	0.077417	0.110596	0.121394	0.128084	0.134458	0.105326	0.104702	0.100712	0.110596	0.110023	0.135044	0.139721	0.101889	0.042274	0.028477	0.0482
126	266	247	553	553	0.591081	46315	1.87828	3.56757	-0.00389105	87.3491	604.074	0.712879	1514.1	30.1258	0.0357313	0.00899766	0.356556	8.09579e-05	1513.8	30.1533	0.0355459	0.00899358	0.356114	8.08845e-05	0.880607	0.406818	0.088626	0.09971	0.11643	0.15211	0.130704	0.094477	0.082699	0.110107	0.129749	0.152828	0.167363	0.186538	0.160367	0.145367	0.119866	0.163966	0.137311	0.168843	0.164041	0.180585	0.066809	0.072743	0.103799
416	329	330	524	529	0.632105	36641.5	2.25041	3.56332	-0.0396476	88.2868	677.901	0.689437	1729.09	32.2613	0.0321843	0.00840324	0.391244	7.06145e-05	1729.89	32.2323	0.0329918	0.00841507	0.390604	7.08135e-05	0.209334	0.17566	0.097581	0.100934	0.090205	0.073449	0.067239	0.063991	0.065567	0.07248	0.080681	0.074269	0.079557	0.101428	0.120083	0.118589	0.125471	0.12503	0.117598	0.097306	0.100384	0.098123	0.103683	0.068201	0.0477
386	367	364	520	529	0.675869	37376.5	1.15041	3.78392	-0.0101523	80.3764	586.898	0.74892	1702.54	31.997	0.0335907	0.00848843	0.423308	7.20535e-05	1706.45	32.013	0.0327421	0.00849549	0.42147	7.21733e-05	0.440462	0.936666	0.10855	0.107897	0.086436	0.086154	0.086753	0.087004	0.106215	0.118393	0.090617	0.057252	0.084775	0.115388	0.12633	0.111421	0.113303	0.090005	0.100459	0.116868	0.118046	0.081781	0.067472	0.06972	0.076388
458	733	749	1193	1226	0.575973	649848	1.85161	3.64465	0.00114155	56.3236	488.767	0.934218	94.471	7.22253	0.146441	0.0421648	0.375222	0.00177787	94.0206	7.21531	0.146757	0.0421869	0.378064	0.00177974	0.205838	0.571147	0.094407	0.084168	0.104309	0.143438	0.15227	0.138498	0.14834	0.186216	0.186331	0.152881	0.152661	0.146314	0.116483	0.069526	0.071478	0.077837	0.079326	0.077246	0.07005	0.077471	0.083046	0.087776	0.08709
455	987	985	1454	1436	0.555146	989810	1.02556	3.67535	0	49.1294	490.518	0.944282	184.54	10.0305	0.112187	0.0303171	0.447905	0.000919129	183.023	9.99066	0.112621	0.0303602	0.452478	0.000921741	0.544813	0.16243	0.127467	0.130259	0.148487	0.190704	0.186115	0.155824	0.159067	0.17069	0.164341	0.128963	0.13949	0.132451	0.149964	0.141602	0.193094	0.20132	0.162557	0.17158	0.194582	0.16643	0.080625	0.058912	0.058812
461	754	743	1324	1341	0.555332	791628	14.2254	3.55556	0.00202429	54.0317	346.671	0.988076	90.4047	6.29305	0.174177	0.0532001	0.697686	0.00283025	110.892	6.46227	0.174914	0.0532438	0.629268	0.0028349	0.22358	0.570231	0.157302	0.186129	0.232293	0.244464	0.23057	0.210023	0.212146	0.236363	0.23977	0.193187	0.190113	0.185741	0.212532	0.210399	0.238196	0.205447	0.162175	0.193373	0.21999	0.237331	0.183473	0.135586	0.088278
826	249	258	392	432	0.397315	10104.5	1	3.54167	-0.00704225	168.461	51.7514	0	1616.11	31.5811	0.032689	0.0105072	0.131254	0.0001104	1639.61	31.7841	0.032474	0.0105302	0.118275	0.000110885	0.92033	0.0909683	0.224732	0.264644	0.256692	0.270726	0.184758	0.141422	0.23111	0.355843	0.275142	0.23005	0.258834	0.238297	0.206104	0.250544	0.404175	0.340277	0.22369	0.253291	0.400181	0.361923	0.292334	0.28036	0.303204
828	253	255	355	356	0.320693	3373.5	1.17021	3.49398	-0.0617284	184.201	40.8013	0	1492.08	30.4486	0.0329637	0.0117217	0.141352	0.000137398	1497.54	30.4512	0.0327988	0.0117861	0.135457	0.000138911	0.841164	0.525642	0.254679	0.287128	0.243607	0.283705	0.252707	0.229003	0.243864	0.316411	0.275141	0.282509	0.325653	0.326961	0.273065	0.258002	0.301926	0.310813	0.245435	0.226854	0.293639	0.330817	0.283082	0.276547	0.334858
817	192	345	370	369	0.237151	7387.5	1.56611	3.44538	0.042735	185.127	45.324	0	2502.09	39.4773	0.0256659	0.00938586	0.0744516	8.80943e-05	2447.18	38.9762	0.0253932	0.0093975	0.094589	8.83131e-05	0.265096	0.712214	0.22814	0.229989	0.229097	0.243728	0.190452	0.179621	0.225861	0.28288	0.229332	0.224675	0.248003	0.240664	0.221302	0.261294	0.301526	0.281533	0.180668	0.230811	0.322065	0.364941	0.273563	0.266271	0.285559
9	626	618	887	914	0.431627	279908	1.17448	3.61215	0.0125	103.186	601.686	0.552023	336.873	14.0302	0.0742002	0.0214022	0.349974	0.000458054	335.064	13.9785	0.0744623	0.0214289	0.352578	0.000459196	0.246243	0.295477	0.098736	0.105164	0.11614	0.119779	0.108474	0.076551	0.061002	0.075384	0.087615	0.106176	0.126588	0.143893	0.116091	0.120085	0.138613	0.129527	0.105886	0.124542	0.135694	0.113693	0.064598	0.070652	0.108009
26	709	704	1016	990	0.460095	392650	1.05727	3.66835	-0.00126422	100.832	624.832	0.592909	343.104	14.2238	0.0732116	0.021083	0.320427	0.000444492	339.159	14.1438	0.0736013	0.021118	0.328229	0.000445969	0.990239	0.0280436	0.107284	0.11157	0.123202	0.149813	0.156055	0.110335	0.098157	0.120951	0.133483	0.105043	0.079756	0.078604	0.06696	0.085479	0.114852	0.131547	0.124463	0.102964	0.106133	0.110291	0.092301	0.063238	0.097268
24	754	779	1148	1047	0.397912	511176	1.48854	3.7105	-0.0010627	105.794	509.166	0.52186	199.487	10.8367	0.0948551	0.0284106	0.232219	0.000807163	192.411	10.6698	0.0951168	0.028525	0.25942	0.000813677	0.55053	0.0125014	0.103449	0.121935	0.152328	0.164449	0.172319	0.162928	0.145872	0.141289	0.127308	0.118688	0.120711	0.141507	0.134042	0.116352	0.102646	0.125256	0.141949	0.143312	0.128832	0.123851	0.110219	0.105459	0.098983
592	379	383	595	602	0.692959	72789.5	1.91405	3.70438	0.00367647	112.979	317.689	0.236298	239.573	11.8239	0.0860072	0.0241997	0.637821	0.000585627	233.579	11.7157	0.0868782	0.024252	0.648349	0.00058816	0.91816	0.594581	0.190749	0.179777	0.190896	0.176303	0.178966	0.138794	0.165715	0.141061	0.111615	0.126566	0.208017	0.231122	0.233877	0.233837	0.262864	0.206584	0.194609	0.207328	0.259063	0.266635	0.220403	0.214879	0.175739
619	404	398	563	593	0.675833	63507	3.29401	3.61957	0.0255474	121.814	615.708	0.212906	962.964	24.0928	0.0427502	0.012117	0.553092	0.000146821	960.118	24.0118	0.0428866	0.0121388	0.554432	0.000147351	0.596404	0.597546	0.245246	0.274005	0.277749	0.283713	0.267871	0.2252	0.246653	0.243289	0.175861	0.163538	0.250338	0.286078	0.284397	0.311836	0.305607	0.266729	0.239363	0.262958	0.280337	0.29048	0.259594	0.299108	0.256276
621	418	418	611	592	0.733089	72019	1.26039	3.70111	0.00371747	121.437	251.607	0.112082	489.719	17.0268	0.0605089	0.0179	0.547181	0.000320409	479.87	16.8773	0.0607731	0.0179433	0.556604	0.000321962	0.649501	0.0926619	0.203092	0.22995	0.246955	0.243816	0.226802	0.200227	0.228281	0.181075	0.169128	0.161487	0.248916	0.287689	0.319321	0.270751	0.254154	0.226256	0.222132	0.218226	0.235514	0.239439	0.233221	0.263279	0.266873
28	592	592	864	858	0.797186	250375	1.00904	3.51663	0	50.4352	358.919	0.954209	554.62	17.5035	0.0654	0.0167728	0.780285	0.000281327	548.486	17.4076	0.0657604	0.0167959	0.782833	0.000282101	0.339099	0.23536	0.134377	0.136442	0.113462	0.106988	0.09903	0.082984	0.094394	0.107573	0.121058	0.113372	0.109966	0.100751	0.100286	0.120768	0.11362	0.119278	0.11384	0.132856	0.125463	0.119477	0.089691	0.087987	0.096162
30	531	534	896	902	0.806582	283626	1.05763	3.42441	-0.00365631	47.8886	336.012	0.962158	372.155	13.6688	0.0875682	0.0234096	0.8698	0.000548008	364.426	13.5684	0.088377	0.0234574	0.872618	0.00055025	0.458821	0.567532	0.176914	0.198741	0.179817	0.213055	0.239972	0.197968	0.193147	0.177851	0.193329	0.237895	0.341035	0.374085	0.229023	0.232469	0.265034	0.306335	0.231546	0.256064	0.287593	0.279741	0.165557	0.107951	0.181432
27	580	576	875	867	0.793918	258318	1.02548	3.73663	0.00596421	50.3476	367.77	0.953443	174.645	9.67462	0.115372	0.0306432	0.792908	0.000939007	173.908	9.64476	0.115794	0.0306804	0.793938	0.000941286	0.0300936	0.475249	0.140399	0.162566	0.189966	0.214539	0.226221	0.160201	0.130587	0.139197	0.151582	0.121019	0.122989	0.170043	0.170411	0.149441	0.13095	0.140579	0.158493	0.188098	0.236491	0.208341	0.110647	0.073037	0.135546
48	250	237	377	352	0.563988	2915	1.06479	3.47945	0.028169	131.938	329.226	0.0133791	1376.5	28.8452	0.0373776	0.0103389	0.720054	0.000106893	1325.25	28.5086	0.0355166	0.010397	0.730942	0.000108098	0.363897	0.514893	0.213113	0.213372	0.209393	0.215005	0.300346	0.269425	0.170667	0.122926	0.198219	0.270325	0.308018	0.357799	0.31032	0.347422	0.362045	0.32782	0.2914	0.26411	0.315494	0.231499	0.193115	0.254498	0.431369
44	313	311	464	442	0.520846	16577	1.21408	3.69388	-0.00689655	97.4825	609.828	0.608735	726.024	20.3583	0.0521052	0.013771	0.801298	0.00018964	691.151	19.9677	0.0522272	0.0138428	0.811075	0.000191623	0.116125	0.565739	0.228969	0.272007	0.368168	0.421005	0.349768	0.18914	0.176065	0.248834	0.287029	0.226384	0.248041	0.282626	0.309909	0.323219	0.296034	0.252716	0.262654	0.305056	0.344208	0.25438	0.193189	0.183189	0.329497
35	252	251	396	394	0.439767	4833	1.02088	3.75824	-0.011236	134.948	705.043	0.163046	1331.11	28.1703	0.0380231	0.0102387	0.701533	0.000104832	1279.84	27.7687	0.039831	0.0103111	0.71289	0.000106319	0.754523	0.85513	0.243719	0.296363	0.30806	0.300767	0.274823	0.243825	0.28925	0.228314	0.191927	0.203967	0.353414	0.419548	0.326494	0.317137	0.338454	0.384055	0.268401	0.280373	0.309174	0.365375	0.284433	0.316352	0.371305
803	263	262	412	412	0.666366	10194	1.14688	3.8125	0.0638298	132.258	317.644	0.0335491	1965.81	34.772	0.0294529	0.00852748	0.495793	7.27179e-05	1953.61	34.5489	0.0296162	0.008581	0.497391	7.36336e-05	0.193055	0.367004	0.425258	0.358932	0.342143	0.318215	0.225806	0.19095	0.310999	0.40755	0.318092	0.317347	0.295261	0.269806	0.225595	0.284973	0.335821	0.339986	0.294997	0.348903	0.422151	0.371116	0.261835	0.245456	0.302179
850	296	294	470	469	0.553467	21574.5	1.05048	3.78689	-0.00552486	138.137	342.276	0.0385177	2209.74	37.0048	0.0274349	0.00813923	0.264411	6.6247e-05	2176.3	36.745	0.0277863	0.00817844	0.274629	6.68869e-05	0.0821107	0.783102	0.208417	0.225154	0.232026	0.273149	0.220589	0.155475	0.182618	0.250433	0.232096	0.221913	0.237804	0.217141	0.224301	0.23571	0.229777	0.176691	0.15726	0.158749	0.167306	0.164052	0.141501	0.100695	0.083888
751	322	322	526	523	0.572593	32655	1.01983	3.49537	0	91.0203	604.733	0.613199	1561.19	30.498	0.0352233	0.00871621	0.538612	7.59723e-05	1574.76	30.6288	0.0338201	0.00871033	0.53438	7.58699e-05	0.82653	0.812651	0.337232	0.295683	0.327255	0.304317	0.196142	0.15468	0.25311	0.339267	0.251049	0.252874	0.318725	0.259812	0.221792	0.24106	0.390575	0.356651	0.289091	0.249068	0.341349	0.323006	0.239464	0.194201	0.239939
[truncated: 732 more columns]

## Sheet: Mixture 2
Table S4 Colony information of Mixture 2
index	x_micro	y_micro	nWidth	nHeight	Feature1	Feature2	Feature3	Feature4	Feature5	Feature6	Feature7	Feature8	Feature9	Feature10	Feature11	Feature12	Feature13	Feature14	Feature15	Feature16	Feature17	Feature18	Feature19	Feature20	Feature21	Feature22	Raman0	Raman1	Raman2	Raman3	Raman4	Raman5	Raman6	Raman7	Raman8	Raman9	Raman10	Raman11	Raman12	Raman13	Raman14	Raman15	Raman16	Raman17	Raman18	Raman19	Raman20	Raman21	Raman22
888	266	264	420	422	0.726209	10846	1.01629	3.28713	-0.010101	120.419	414.483	0.193528	1530.33	30.2978	0.0342246	0.00892135	0.634143	7.95905e-05	1495.63	29.9426	0.0344859	0.00895089	0.64209	8.01184e-05	0.392118	0.296463	0.181748	0.179246	0.177306	0.194729	0.183521	0.171817	0.178331	0.20291	0.177819	0.180605	0.213618	0.266259	0.215583	0.203807	0.205077	0.207399	0.180453	0.196321	0.221255	0.195442	0.180378	0.230302	0.254309
1076	262	261	415	416	0.736233	9997	1.01414	3.7963	-0.00943396	114.178	409.872	0.306892	1426.81	29.3861	0.03476	0.00906107	0.717485	8.2103e-05	1424.23	29.4145	0.0355216	0.00907501	0.717812	8.23559e-05	0.744781	0.860543	0.132144	0.15565	0.189461	0.17946	0.15937	0.156863	0.179179	0.19819	0.183693	0.161588	0.1647	0.195818	0.181052	0.150997	0.137575	0.175436	0.186695	0.173615	0.138397	0.130511	0.126993	0.190087	0.216979
945	279	278	409	408	0.747184	8779	1.01305	3.53271	-0.0666667	124.468	380.808	0.101378	1566.03	30.5484	0.033741	0.0090624	0.625465	8.2127e-05	1514.02	30.2138	0.0338348	0.00909292	0.637308	8.26812e-05	0.763683	0.872735	0.140198	0.165545	0.19762	0.268111	0.211009	0.130352	0.117213	0.198029	0.206352	0.169485	0.166543	0.215181	0.213802	0.232148	0.299538	0.328197	0.278311	0.253895	0.283834	0.229951	0.207857	0.233124	0.270002
1070	257	255	405	408	0.753625	8432.5	1.02662	3.59223	0.00990099	118.895	365.225	0.196857	1210.11	26.8832	0.039087	0.0102347	0.720251	0.00010475	1227.95	26.9288	0.0387404	0.0102516	0.716343	0.000105096	0.717758	0.480976	0.166042	0.183416	0.179494	0.219276	0.190799	0.152638	0.138607	0.174135	0.176971	0.187737	0.203499	0.216807	0.193182	0.240531	0.336183	0.325705	0.272018	0.318243	0.340818	0.21105	0.109837	0.19316	0.268201
996	253	253	399	400	0.727859	7517	1.01371	3.31183	0.021978	124.89	352.506	0.0803512	720.026	20.6971	0.0491413	0.0123291	0.688556	0.000152008	750.407	20.8092	0.0512483	0.012434	0.675122	0.000154605	0.521533	0.00779298	0.179797	0.188686	0.185964	0.205802	0.17121	0.15224	0.166527	0.171907	0.196442	0.146042	0.201381	0.232676	0.232335	0.210029	0.318504	0.324485	0.221817	0.239656	0.309276	0.22991	0.117927	0.147897	0.20711
990	269	269	400	400	0.714852	7576	1.0495	3.56471	0.0120482	124.82	355.977	0.0807814	1368.56	28.8058	0.0348642	0.00941051	0.71585	8.85578e-05	1398.91	28.9915	0.0353807	0.00941702	0.709455	8.86803e-05	0.354265	0.593238	0.154542	0.168422	0.164306	0.168591	0.173708	0.174532	0.166208	0.171508	0.178579	0.161899	0.149161	0.189923	0.206218	0.261653	0.301568	0.28889	0.236551	0.249025	0.269991	0.209654	0.151104	0.200438	0.262111
181	1091	1087	1728	1722	0.655706	1599503	1.01546	3.65199	0.000723066	48.8714	333.756	0.959672	70.8507	6.14717	0.172712	0.0503383	0.544192	0.00253395	70.2737	6.12238	0.173688	0.0504164	0.547946	0.00254182	0.2366	0.80323	0.079126	0.095573	0.076328	0.075051	0.081963	0.088803	0.101667	0.137015	0.117344	0.092279	0.084532	0.118489	0.126287	0.135636	0.130309	0.096802	0.072321	0.11022	0.157325	0.159133	0.124617	0.119283	0.107207
174	1117	1121	1644	1629	0.723625	1389280	1.00331	3.60537	0.00158103	42.0965	264.295	0.976797	84.4977	6.78318	0.158393	0.0447442	0.600944	0.00200205	84.5284	6.75864	0.159009	0.0448105	0.600839	0.00200798	0.481026	0.30865	0.113726	0.104418	0.106268	0.154271	0.153566	0.140259	0.178429	0.225876	0.187801	0.150927	0.168505	0.208188	0.204225	0.213971	0.212561	0.143968	0.102974	0.166951	0.249999	0.229015	0.183311	0.174956	0.163791
178	516	524	787	763	0.654784	170600	1.05886	3.63288	-0.00226244	61.4792	708.452	0.871263	672.79	19.6186	0.0563699	0.0143053	0.573345	0.000204642	664.884	19.5253	0.0566986	0.0143141	0.578609	0.000204894	0.186904	0.261121	0.112558	0.122732	0.122535	0.120601	0.135818	0.133699	0.143387	0.172343	0.137708	0.105468	0.112883	0.155214	0.134381	0.12662	0.135366	0.111996	0.086975	0.13153	0.185362	0.190739	0.145471	0.127744	0.092815
173	1119	1122	1645	1630	0.735117	1.39118e+06	1.00472	3.73718	-0.000802568	42.1608	263.858	0.976599	96.8006	7.26606	0.149052	0.0418153	0.601404	0.00174852	96.4302	7.2361	0.149506	0.0418792	0.602984	0.00175387	0.411569	0.953355	0.065868	0.085039	0.086322	0.108751	0.096127	0.093308	0.118232	0.153862	0.154372	0.124238	0.126683	0.135327	0.153039	0.147565	0.150049	0.127918	0.117244	0.121826	0.143378	0.167308	0.164334	0.167643	0.162868
180	1212	1206	1710	1713	0.71863	1554579	3.14854	3.52889	0.00074184	44.7456	272.74	0.973598	135.679	8.54819	0.129289	0.0358403	0.592786	0.00128453	135.775	8.53496	0.129752	0.0358878	0.59251	0.00128793	0.989035	0.803366	0.11954	0.169515	0.150824	0.132826	0.132866	0.130991	0.147802	0.164624	0.142859	0.128142	0.144846	0.149809	0.15765	0.177832	0.189174	0.109623	0.068997	0.148371	0.223275	0.211679	0.1667	0.170908	0.132459
175	957	1057	1876	1660	0.669623	1698882	2.02858	3.59797	-0.00290698	54.6115	285.201	0.965208	153.954	9.01358	0.12177	0.0352736	0.634945	0.00124423	151.64	8.9587	0.122237	0.0353243	0.640382	0.00124781	0.181629	0.548634	0.088512	0.104761	0.092881	0.108147	0.111383	0.108209	0.133726	0.160233	0.145212	0.121655	0.146295	0.147053	0.132217	0.12238	0.14385	0.115868	0.098814	0.108235	0.127349	0.12326	0.124697	0.121145	0.099713
341	263	264	410	409	0.658602	9861	1.00073	3.20635	-0.0645161	142.638	252.369	0.00010141	967.981	24.3145	0.0417873	0.0118367	0.407849	0.000140108	977.689	24.3487	0.0427338	0.0118132	0.401138	0.000139552	0.980582	0.0216027	0.117236	0.098063	0.120268	0.163988	0.179977	0.158199	0.137659	0.158175	0.160387	0.127535	0.144891	0.168884	0.186562	0.160195	0.150451	0.106857	0.119293	0.148846	0.161943	0.136598	0.113843	0.091084	0.095465
367	263	262	411	410	0.702223	9616.5	1.00478	3.56989	-0.0769231	136.95	212.216	0	1940.44	34.5655	0.02884	0.00888201	0.425285	7.88901e-05	1914.56	34.3428	0.0282161	0.00892186	0.432391	7.95996e-05	0.236462	0.268314	0.176655	0.262861	0.203373	0.154933	0.128464	0.181433	0.190948	0.256553	0.239075	0.181608	0.163502	0.178647	0.199348	0.174703	0.187008	0.188871	0.161859	0.144942	0.142162	0.180997	0.147097	0.091109	0.067896
358	269	269	421	419	0.731544	10742	1.00521	3.62857	-0.00970874	134.629	294.634	0.000930925	1962.52	34.6868	0.0302928	0.00858687	0.521586	7.37343e-05	1954.93	34.5326	0.0311668	0.00862227	0.523233	7.43436e-05	0.191007	0.391699	0.184519	0.20831	0.205741	0.203631	0.164501	0.146446	0.161753	0.216264	0.2141	0.18436	0.152126	0.125972	0.152352	0.199944	0.231039	0.205483	0.190918	0.214661	0.202009	0.185999	0.141073	0.138842	0.118476
373	260	258	401	405	0.54768	9734	2.02527	3.83471	0	140.305	147.87	0	2271.33	37.4959	0.0272313	0.00884551	0.267532	7.82431e-05	2292.64	37.6782	0.0266243	0.0088497	0.25967	7.83173e-05	0.634442	0.951662	0.152544	0.180732	0.175708	0.184225	0.174134	0.18465	0.184538	0.219315	0.19988	0.148596	0.160154	0.221255	0.251716	0.214814	0.18808	0.158179	0.136755	0.1694	0.206309	0.203536	0.148662	0.110633	0.128771
345	272	273	429	429	0.636296	12738	1.00658	3.49231	0.0078125	145.209	204.806	0	1840.9	33.5823	0.0302258	0.00890752	0.440659	7.93439e-05	1830.57	33.4444	0.0308215	0.00891838	0.443487	7.95374e-05	0.484909	0.893047	0.161936	0.158287	0.112519	0.150298	0.175935	0.151053	0.118077	0.143516	0.161036	0.118887	0.141524	0.179134	0.201648	0.150505	0.141948	0.126998	0.124061	0.128089	0.134146	0.114466	0.100159	0.094059	0.108565
376	294	284	406	410	0.664147	8997	1.07077	3.48113	0	149.235	196.798	0	1548.94	30.7011	0.0336178	0.00974316	0.412341	9.49291e-05	1570.89	30.9267	0.0337356	0.00970554	0.403562	9.41976e-05	0.00594284	0.85703	0.152173	0.141343	0.137985	0.209736	0.232174	0.214534	0.190177	0.242556	0.245406	0.200218	0.187565	0.241234	0.256486	0.198331	0.161512	0.168463	0.167118	0.1646	0.170411	0.186644	0.155213	0.126691	0.126175
95	1034	1008	1257	1248	0.130013	556689	1.75538	3.66289	0.00252366	112.521	451.776	0.286666	186.441	10.5815	0.0934434	0.0297527	0.223723	0.000885223	184.34	10.5274	0.0937989	0.0297837	0.232813	0.000887066	0.721184	0.852417	0.074341	0.111562	0.126221	0.125291	0.108397	0.083486	0.068559	0.084039	0.086772	0.099199	0.110052	0.093519	0.068957	0.082244	0.103382	0.093958	0.069481	0.109284	0.115738	0.118565	0.053766	0.075468	0.082032
191	974	948	1357	1319	0.138375	661949	1.08452	3.70029	0.003544	92.8478	503.08	0.554884	658.615	20.0634	0.0511447	0.015537	0.15275	0.000241399	654.789	20.0071	0.0510863	0.0155518	0.157109	0.000241859	0.453089	0.831168	0.129484	0.140409	0.128664	0.116991	0.119598	0.123101	0.14655	0.169286	0.150199	0.123288	0.129511	0.145504	0.141029	0.14758	0.16708	0.125105	0.096742	0.121358	0.160712	0.14745	0.120719	0.111453	0.077714
94	1117	1186	1263	1253	0.154578	503289	1	3.7564	-0.0014652	111.197	385.653	0.289543	484.639	17.2632	0.0583785	0.0181791	0.130108	0.000330478	480.842	17.2047	0.058412	0.0181941	0.136808	0.000331026	0.0163925	0.0780861	0.135055	0.162704	0.177788	0.164348	0.135751	0.083205	0.095621	0.141084	0.173487	0.191414	0.203308	0.162009	0.110132	0.144841	0.160775	0.161223	0.104295	0.157766	0.182556	0.195938	0.070889	0.069937	0.110277
194	1525	1537	1876	1961	0.0607914	1.75451e+06	2.34112	3.71301	-0.00192864	110.911	679.153	0.3333	259.196	12.5731	0.0795451	0.0246928	0.168236	0.000609734	258.286	12.5473	0.0796895	0.024706	0.171026	0.000610387	0.948252	0.8047	0.052424	0.065808	0.056949	0.062013	0.083231	0.091582	0.097768	0.102004	0.079255	0.05748	0.07419	0.091968	0.089708	0.063067	0.063377	0.047951	0.035898	0.038986	0.065857	0.070759	0.064468	0.051272	0.041088
92	847	909	1096	1158	0.169478	468192	118.26	3.59323	-0.00247934	111.155	407.659	0.293937	232.667	11.9242	0.0831294	0.0264115	0.137526	0.000697567	228.904	11.8351	0.0836492	0.0264527	0.151191	0.000699743	0.123923	0.972633	0.09735	0.088572	0.123886	0.178368	0.165416	0.111525	0.105067	0.135536	0.161739	0.16353	0.150539	0.124734	0.126418	0.15072	0.157276	0.12472	0.090146	0.104659	0.132593	0.147129	0.095564	0.092025	0.114341
188	1133	1179	1553	1481	0.132227	806314	1.65172	3.70486	0.00054615	94.8505	422.487	0.519482	209.157	11.3091	0.0877521	0.0275608	0.150949	0.000759598	207.39	11.2578	0.0881165	0.0275912	0.158393	0.000761276	0.660952	0.0479301	0.108848	0.12974	0.110428	0.125333	0.124297	0.121207	0.134186	0.156868	0.136678	0.102296	0.127012	0.148066	0.156516	0.152398	0.168953	0.100748	0.040151	0.076538	0.169468	0.152716	0.093626	0.080757	0.09055
258	293	295	472	468	0.545496	22630.5	2.44867	3.59884	0.0352941	128.355	303.763	0.035704	1878.22	33.9643	0.0309576	0.00905564	0.207731	8.20045e-05	1863.45	33.9574	0.0297081	0.00905037	0.212561	8.19091e-05	0.422543	0.455818	0.032206	0.040681	0.070527	0.102895	0.111676	0.094415	0.091184	0.098785	0.107025	0.099157	0.095792	0.088147	0.089591	0.087614	0.108682	0.091195	0.067379	0.060567	0.076853	0.072628	0.082019	0.091129	0.070463
228	276	277	428	426	0.667171	15136.5	6.62577	3.69421	-0.0588235	133.543	279.045	0.000660655	824.33	22.4596	0.0453041	0.0125206	0.345816	0.000156766	858.57	22.9013	0.0449216	0.0124522	0.317718	0.000155056	0.927455	0.707929	0.06198	0.082287	0.085964	0.092241	0.085099	0.084527	0.080596	0.086837	0.07849	0.080122	0.084227	0.081172	0.072457	0.069597	0.082123	0.074344	0.058446	0.067578	0.078903	0.078549	0.085226	0.104322	0.071773
250	341	340	518	524	0.599296	35900.5	1.16736	3.51643	0.014218	107.967	405.953	0.390357	1938.48	34.3232	0.0305859	0.0083416	0.340914	6.95823e-05	1926.78	34.3453	0.0300619	0.00833263	0.344043	6.94326e-05	0.273842	0.888658	0.047691	0.073928	0.086046	0.087491	0.090368	0.087816	0.08495	0.084442	0.081161	0.081835	0.090634	0.090425	0.076956	0.088743	0.106181	0.086123	0.04997	0.063823	0.087619	0.086571	0.084581	0.081823	0.053894
259	320	322	509	504	0.545034	31212.5	1.46846	3.68519	0.00934579	118.774	347.142	0.197453	2089.32	35.7535	0.0283486	0.00834953	0.256324	6.97147e-05	2080.14	35.7295	0.0289777	0.00836965	0.259414	7.00511e-05	0.245033	0.768817	0.054585	0.086467	0.088039	0.079565	0.086222	0.100856	0.093687	0.085252	0.075073	0.089771	0.104588	0.109069	0.100894	0.085644	0.08275	0.070533	0.060167	0.076389	0.092268	0.083597	0.080869	0.091027	0.069244
246	326	324	458	456	0.616173	21618	1.70142	3.4	0	115.524	461.836	0.333703	2042.5	35.3291	0.0295138	0.0079655	0.350692	6.34492e-05	2085.28	35.8524	0.0286202	0.00794746	0.33576	6.31621e-05	0.937668	0.343487	0.064949	0.089441	0.091828	0.078336	0.085454	0.090808	0.09244	0.093982	0.089277	0.068406	0.073829	0.088492	0.09744	0.092069	0.113965	0.095367	0.064576	0.058094	0.08074	0.074516	0.077805	0.092313	0.073176
256	317	317	483	486	0.572295	26558	1.85896	3.68108	0.00546448	122.818	367.114	0.148204	2001.84	35.1407	0.0299655	0.00850016	0.25136	7.22527e-05	1983.6	34.9222	0.0291575	0.0085144	0.256967	7.24949e-05	0.709623	0.490369	0.048585	0.080959	0.077843	0.067668	0.077451	0.089435	0.086087	0.084993	0.090324	0.089312	0.08777	0.074121	0.071406	0.069085	0.100472	0.082066	0.052654	0.043802	0.06711	0.06023	0.072015	0.081231	0.050623
207	455	453	800	805	0.827964	197424	1.01296	3.41649	-0.00424628	55.1316	248.308	0.96485	402.516	14.1584	0.0841528	0.0229241	0.888084	0.000525515	392.781	14.0214	0.0849217	0.0229621	0.89096	0.000527259	0.61766	0.0514655	0.107364	0.126522	0.101894	0.109074	0.117307	0.117493	0.129916	0.149378	0.119945	0.08972	0.132067	0.15926	0.156246	0.138479	0.157005	0.112942	0.082003	0.097545	0.128568	0.128678	0.099334	0.090402	0.056855
215	326	324	537	538	0.825413	43563	2.02799	3.42424	0	58.3518	361.965	0.943232	543.884	16.6897	0.0732473	0.0181399	0.902032	0.000329055	540.13	16.6214	0.0738423	0.0181774	0.902925	0.000330419	0.296902	0.542415	0.123289	0.123789	0.130313	0.181851	0.17113	0.166342	0.179173	0.24944	0.208242	0.154789	0.141453	0.178073	0.168964	0.174963	0.202545	0.163321	0.098575	0.147796	0.208862	0.208647	0.142189	0.13582	0.077239
199	373	373	543	531	0.848284	43576.5	1.06052	3.71698	-0.00952381	52.0491	414.643	0.950788	430.642	15.3355	0.0740409	0.019311	0.880548	0.000372913	418.003	15.1223	0.0749919	0.0193588	0.884262	0.000374763	0.0434181	0.938072	0.148659	0.160915	0.149475	0.174143	0.206968	0.20581	0.223625	0.252468	0.197661	0.163571	0.183914	0.25635	0.219727	0.206888	0.224306	0.179765	0.11973	0.154434	0.261671	0.243217	0.184503	0.141049	0.097706
223	315	314	521	526	0.852771	39438.5	1.04387	3.57416	0.00966184	59.0533	389.442	0.937282	487.27	15.9132	0.0746348	0.0188143	0.895163	0.000353976	470.102	15.7659	0.074122	0.0187886	0.899072	0.000353012	0.405653	0.955693	0.135969	0.144435	0.120678	0.11888	0.135085	0.152443	0.170223	0.217912	0.182279	0.150222	0.11649	0.175748	0.205947	0.215648	0.208407	0.153993	0.100679	0.151624	0.24496	0.232649	0.158594	0.143484	0.091769
210	331	335	543	534	0.849938	44933	1.0468	3.52308	0	51.3963	383.551	0.958182	477.743	15.5426	0.079835	0.0197571	0.908281	0.000390341	458.05	15.3216	0.0800195	0.01975	0.912252	0.000390064	0.206132	0.622204	0.156077	0.180741	0.145132	0.167779	0.156599	0.186801	0.183065	0.218352	0.170449	0.149368	0.174223	0.229409	0.231435	0.22287	0.220604	0.169128	0.121546	0.173876	0.222399	0.216758	0.168162	0.145144	0.105048
208	418	419	609	595	0.827304	72234.5	11.0183	3.47586	0.00694444	60.7821	308.724	0.944867	437.445	15.5696	0.0716189	0.0189402	0.840223	0.000358731	431.406	15.4581	0.0712005	0.0189652	0.842683	0.000359678	0.368875	0.214294	0.107428	0.113636	0.109601	0.14181	0.161907	0.164245	0.175271	0.173234	0.130909	0.11688	0.135842	0.158036	0.149749	0.155412	0.162226	0.141994	0.119047	0.157881	0.185852	0.167634	0.117346	0.122145	0.095355
717	2570	2564	952	859	0.524533	284880	3.26105	3.80775	0.00972447	89.0853	805.382	0.685631	339.781	14.0272	0.0758512	0.0206188	0.433846	0.000425136	331.65	13.8294	0.0767073	0.0207079	0.446875	0.000428817	0.248624	0.774779	0.083001	0.105122	0.109643	0.102179	0.088974	0.07439	0.078956	0.102879	0.114868	0.110547	0.109369	0.095489	0.082721	0.07816	0.09733	0.111016	0.101531	0.090889	0.09677	0.096002	0.081889	0.068616	0.074628
511	373	375	575	573	0.654929	49112.5	1.91087	3.58796	0	70.631	677.321	0.816228	1891.11	33.5019	0.0323904	0.00804589	0.38854	6.47364e-05	1889.52	33.4238	0.0331644	0.00805791	0.388783	6.49299e-05	0.645823	0.688207	0.101927	0.107875	0.156005	0.195421	0.175603	0.146069	0.159792	0.167842	0.12555	0.130824	0.188184	0.194864	0.18439	0.177543	0.249582	0.216462	0.175484	0.150302	0.224191	0.205661	0.152698	0.147494	0.145615
723	2587	2579	864	881	0.407917	231372	1.15105	3.70787	0.00161031	75.3503	1100.36	0.839421	620.128	19.0011	0.0569823	0.0151654	0.401333	0.000229989	605.49	18.8262	0.0569124	0.0152014	0.415489	0.000231083	0.520718	0.3161	0.125616	0.140206	0.138302	0.147399	0.122523	0.105543	0.106462	0.132825	0.105255	0.11431	0.133877	0.138773	0.115696	0.121421	0.13654	0.14388	0.134343	0.137779	0.164084	0.172043	0.128736	0.085699	0.079635
745	2520	2596	894	848	0.374924	231986	2.94732	3.71609	0	76.0817	1173.17	0.68623	587.067	18.5146	0.0587157	0.0155766	0.40398	0.00024263	575.929	18.3591	0.0587681	0.0156162	0.41532	0.000243866	0.516111	0.737467	0.115982	0.12892	0.146524	0.146019	0.11194	0.065673	0.099968	0.137397	0.118164	0.109831	0.133795	0.139284	0.129019	0.117988	0.114791	0.12225	0.124827	0.112794	0.101827	0.104912	0.090791	0.077215	0.073576
556	795	764	896	1294	0.242321	426720	1.32781	3.73304	0.00626118	85.0415	1140.01	0.619475	133.532	8.84895	0.113606	0.0337141	0.296347	0.00113664	132.65	8.85606	0.112903	0.0337029	0.300913	0.00113588	0.404739	0.245499	0.09824	0.112866	0.108435	0.111108	0.109619	0.085222	0.093826	0.088751	0.07459	0.083581	0.108084	0.12293	0.132179	0.15914	0.15664	0.140015	0.121973	0.114121	0.128622	0.132079	0.121779	0.110546	0.09899
495	453	446	669	653	0.554437	77347	2.40162	3.54434	0	71.907	900.442	0.764645	405.224	15.5236	0.0686621	0.018053	0.329085	0.000325912	403.229	15.5009	0.0676427	0.0180582	0.332324	0.000326099	0.46733	0.183975	0.172825	0.204113	0.216992	0.19625	0.176042	0.160604	0.202302	0.215899	0.178834	0.170293	0.219403	0.242107	0.233984	0.226	0.264227	0.242708	0.238258	0.225955	0.285253	0.244377	0.201371	0.20456	0.207587
0	1051	1090	1566	1525	0.158344	1044236	1.02618	3.69227	0.00104603	64.1701	201.635	1.25599	767.923	21.5184	0.0480158	0.0145187	0.188529	0.000210794	761.047	21.4169	0.0484319	0.0145371	0.195535	0.000211327	0.242962	0.490575	0.099481	0.103026	0.103594	0.10334	0.10319	0.093415	0.079446	0.062334	0.101152	0.171387	0.238868	0.239952	0.169	0.126621	0.139962	0.151244	0.111571	0.095259	0.109363	0.145592	0.116978	0.071596	0.06074
1	636	633	1170	1207	0.190914	354150	1.05969	3.75619	0.0019084	59.6887	156.23	1.93476	1131.81	26.2236	0.0395833	0.0121207	0.141525	0.000146913	1105.16	25.8916	0.0401393	0.0121587	0.161	0.000147834	0.465148	0.253557	0.150008	0.157544	0.150398	0.185996	0.230422	0.178416	0.144337	0.117125	0.132993	0.136076	0.158844	0.176265	0.177963	0.162319	0.134396	0.12854	0.148239	0.15753	0.136497	0.101977	0.058876	0.055169	0.09098
5	619	605	955	992	0.208722	253048	1	3.77053	0.0011274	61.6165	221.101	1.53071	1498.3	30.2145	0.0337676	0.0104873	0.146892	0.000109984	1482.82	30.0622	0.0344197	0.0105024	0.15496	0.000110301	0.525712	0.817644	0.123641	0.142992	0.154064	0.174921	0.172259	0.128237	0.08523	0.062717	0.073633	0.094276	0.124434	0.177881	0.138722	0.153544	0.128174	0.143577	0.109057	0.143469	0.14794	0.136184	0.059358	0	0.055856
2	1126	1106	1423	1429	0.0986652	730284	5.51863	3.72858	0.000495786	75.6042	121.991	1.2157	679.636	20.4668	0.0492618	0.0153524	0.128627	0.000235696	670.394	20.316	0.0497174	0.0153783	0.140145	0.000236491	0.434986	0.540838	0.123949	0.132385	0.149441	0.176698	0.213697	0.182191	0.133725	0.105069	0.122831	0.180441	0.257378	0.290545	0.19977	0.187452	0.192117	0.207792	0.15247	0.143297	0.182537	0.233424	0.142568	0.08627	0.097883
4	1256	1218	1999	1765	0.0937998	1.91238e+06	3.4235	3.73608	0.000592768	81.4971	224.022	0.898459	319.377	13.968	0.0716861	0.0223326	0.155389	0.000498745	315.91	13.897	0.0719551	0.0223608	0.164265	0.000500005	0.12184	0.16355	0.22674	0.230862	0.198668	0.257167	0.317097	0.223427	0.159661	0.191241	0.21852	0.197306	0.187038	0.174921	0.154438	0.18243	0.203534	0.171034	0.10358	0.152592	0.240172	0.279627	0.199045	0.158298	0.182733
3	442	470	1558	995	0.148433	622657	1.5502	3.40476	-0.00216763	72.295	191.464	1.08247	411.876	15.8634	0.0635975	0.0197661	0.154214	0.0003907	408.506	15.7933	0.0637941	0.019782	0.161073	0.000391329	0.402787	0.127207	0.103475	0.110661	0.091783	0.105329	0.169901	0.163613	0.138613	0.100316	0.096932	0.149966	0.22978	0.257458	0.197351	0.213539	0.206361	0.172859	0.155921	0.216463	0.271201	0.238755	0.115256	0.055812	0.072809
6	1190	1355	2194	2539	0.529492	3250160	1.17437	3.56199	-0.00136861	59.577	246.879	0.956082	131.214	8.36623	0.127432	0.0382738	0.521214	0.00146489	129.32	8.31878	0.128071	0.038331	0.528049	0.00146927	0.446248	0.0274294	0.093223	0.102087	0.113445	0.132008	0.135503	0.07949	0.035805	0.063501	0.111282	0.163047	0.179052	0.18147	0.153372	0.145446	0.111506	0.063891	0.046576	0.073966	0.090167	0.086332	0.06356	0.05875	0.072859
7	1781	1830	2445	2744	0.381136	4.18311e+06	1.11091	3.58141	0.000366166	98.5188	187.227	0.729168	111.486	8.15896	0.120041	0.0379414	0.238778	0.00143955	110.453	8.12443	0.120475	0.0379767	0.245849	0.00144223	0.663393	0.916014	0.066056	0.090333	0.113495	0.156608	0.154606	0.106474	0.033771	0.04754	0.092965	0.122328	0.109787	0.112678	0.120873	0.127477	0.098446	0.062964	0.060427	0.106396	0.136863	0.129135	0.070399	0.05812	0.098666
8	1922	2148	3021	2555	0.337819	4691419	2.65519	3.62892	0.0015868	63.4903	670.479	0.816672	123.829	8.4016	0.124313	0.0360099	0.371509	0.00129671	122.006	8.35182	0.124821	0.0360719	0.380758	0.00130118	0.549413	0.338188	0.098961	0.116376	0.115085	0.116999	0.111244	0.077984	0.066213	0.077417	0.110596	0.121394	0.128084	0.134458	0.105326	0.104702	0.100712	0.110596	0.110023	0.135044	0.139721	0.101889	0.042274	0.028477	0.0482
126	266	247	553	553	0.591081	46315	1.87828	3.56757	-0.00389105	87.3491	604.074	0.712879	1514.1	30.1258	0.0357313	0.00899766	0.356556	8.09579e-05	1513.8	30.1533	0.0355459	0.00899358	0.356114	8.08845e-05	0.880607	0.406818	0.088626	0.09971	0.11643	0.15211	0.130704	0.094477	0.082699	0.110107	0.129749	0.152828	0.167363	0.186538	0.160367	0.145367	0.119866	0.163966	0.137311	0.168843	0.164041	0.180585	0.066809	0.072743	0.103799
416	329	330	524	529	0.632105	36641.5	2.25041	3.56332	-0.0396476	88.2868	677.901	0.689437	1729.09	32.2613	0.0321843	0.00840324	0.391244	7.06145e-05	1729.89	32.2323	0.0329918	0.00841507	0.390604	7.08135e-05	0.209334	0.17566	0.097581	0.100934	0.090205	0.073449	0.067239	0.063991	0.065567	0.07248	0.080681	0.074269	0.079557	0.101428	0.120083	0.118589	0.125471	0.12503	0.117598	0.097306	0.100384	0.098123	0.103683	0.068201	0.0477
386	367	364	520	529	0.675869	37376.5	1.15041	3.78392	-0.0101523	80.3764	586.898	0.74892	1702.54	31.997	0.0335907	0.00848843	0.423308	7.20535e-05	1706.45	32.013	0.0327421	0.00849549	0.42147	7.21733e-05	0.440462	0.936666	0.10855	0.107897	0.086436	0.086154	0.086753	0.087004	0.106215	0.118393	0.090617	0.057252	0.084775	0.115388	0.12633	0.111421	0.113303	0.090005	0.100459	0.116868	0.118046	0.081781	0.067472	0.06972	0.076388
155	379	379	546	525	0.600221	40193	1.30969	3.37131	0	93.4628	666.585	0.782475	1814.67	33.0413	0.0318807	0.00831894	0.388284	6.92048e-05	1784.69	32.7825	0.0321293	0.00835078	0.39842	6.97356e-05	0.952603	0.866853	0.164956	0.239309	0.291709	0.36846	0.337503	0.238535	0.25737	0.329455	0.335082	0.278341	0.303067	0.300779	0.304594	0.341075	0.315582	0.301389	0.250132	0.31467	0.309437	0.369952	0.276752	0.302549	0.329698
144	331	330	457	456	0.571632	22719.5	1.36075	3.17877	0.0169492	123.818	279.895	0.0595964	1917.32	34.5035	0.0289692	0.00885936	0.222986	7.84882e-05	1848.81	33.9368	0.0294198	0.00888949	0.250618	7.90231e-05	0.944778	0.115151	0.366414	0.384882	0.402693	0.433412	0.416614	0.36822	0.35996	0.432708	0.4536	0.457119	0.4874	0.511107	0.490899	0.455857	0.425976	0.42714	0.42034	0.464484	0.455797	0.449254	0.337757	0.39478	0.505046
401	445	444	724	728	0.561487	125064	1.04534	3.41748	0.00243902	69.7007	597.192	0.844931	522.304	17.2889	0.0634289	0.0161735	0.478047	0.000261583	522.153	17.3185	0.0630088	0.0161683	0.478337	0.000261415	0.476027	0.0245106	0.14567	0.141729	0.124056	0.11144	0.125257	0.117053	0.116528	0.114388	0.105787	0.085354	0.076311	0.082373	0.112807	0.142325	0.175285	0.149857	0.127962	0.117882	0.130044	0.099405	0.083186	0.070229	0.072731
458	733	749	1193	1226	0.575973	649848	1.85161	3.64465	0.00114155	56.3236	488.767	0.934218	94.471	7.22253	0.146441	0.0421648	0.375222	0.00177787	94.0206	7.21531	0.146757	0.0421869	0.378064	0.00177974	0.205838	0.571147	0.094407	0.084168	0.104309	0.143438	0.15227	0.138498	0.14834	0.186216	0.186331	0.152881	0.152661	0.146314	0.116483	0.069526	0.071478	0.077837	0.079326	0.077246	0.07005	0.077471	0.083046	0.087776	0.08709
455	987	985	1454	1436	0.555146	989810	1.02556	3.67535	0	49.1294	490.518	0.944282	184.54	10.0305	0.112187	0.0303171	0.447905	0.000919129	183.023	9.99066	0.112621	0.0303602	0.452478	0.000921741	0.544813	0.16243	0.127467	0.130259	0.148487	0.190704	0.186115	0.155824	0.159067	0.17069	0.164341	0.128963	0.13949	0.132451	0.149964	0.141602	0.193094	0.20132	0.162557	0.17158	0.194582	0.16643	0.080625	0.058912	0.058812
461	754	743	1324	1341	0.555332	791628	14.2254	3.55556	0.00202429	54.0317	346.671	0.988076	90.4047	6.29305	0.174177	0.0532001	0.697686	0.00283025	110.892	6.46227	0.174914	0.0532438	0.629268	0.0028349	0.22358	0.570231	0.157302	0.186129	0.232293	0.244464	0.23057	0.210023	0.212146	0.236363	0.23977	0.193187	0.190113	0.185741	0.212532	0.210399	0.238196	0.205447	0.162175	0.193373	0.21999	0.237331	0.183473	0.135586	0.088278
323	1060	1050	1471	1543	0.485289	1098700	1.39242	3.63158	0	53.1444	560.529	1.06042	185.851	10.2062	0.107596	0.029688	0.353612	0.00088138	186.775	10.2337	0.107219	0.0296639	0.350279	0.000879949	0.209592	0.147145	0.090018	0.118396	0.148308	0.172011	0.169744	0.147403	0.119547	0.118046	0.125919	0.137744	0.153668	0.152072	0.142336	0.137203	0.169743	0.132499	0.139448	0.213163	0.272552	0.188354	0.054562	0.066374	0.116527
439	787	786	1192	1192	0.525648	603454	1.23629	3.64706	0.00764192	59.2976	643.004	0.914491	668.795	19.5957	0.05705	0.0152206	0.3167	0.000231667	668.775	19.5833	0.0571602	0.015227	0.316698	0.000231861	0.754518	0.125261	0.185436	0.224008	0.227505	0.203263	0.186632	0.173427	0.211561	0.234895	0.217884	0.163566	0.169979	0.141826	0.156579	0.149439	0.173393	0.119328	0.10548	0.147845	0.185587	0.14413	0.090937	0.081623	0.097887
446	559	792	1334	1470	0.357566	901026	1.17621	3.60088	0	52.4173	401.934	0.971734	224.408	11.1231	0.0986916	0.0281736	0.39268	0.000793753	225.635	11.1133	0.0998135	0.0282265	0.389036	0.000796733	0.113509	0.930348	0.202139	0.200723	0.240981	0.291236	0.277688	0.222772	0.240442	0.289882	0.292967	0.239569	0.230296	0.242041	0.261584	0.244241	0.229482	0.204536	0.219027	0.285139	0.335446	0.279131	0.201038	0.144274	0.170567
826	249	258	392	432	0.397315	10104.5	1	3.54167	-0.00704225	168.461	51.7514	0	1616.11	31.5811	0.032689	0.0105072	0.131254	0.0001104	1639.61	31.7841	0.032474	0.0105302	0.118275	0.000110885	0.92033	0.0909683	0.224732	0.264644	0.256692	0.270726	0.184758	0.141422	0.23111	0.355843	0.275142	0.23005	0.258834	0.238297	0.206104	0.250544	0.404175	0.340277	0.22369	0.253291	0.400181	0.361923	0.292334	0.28036	0.303204
828	253	255	355	356	0.320693	3373.5	1.17021	3.49398	-0.0617284	184.201	40.8013	0	1492.08	30.4486	0.0329637	0.0117217	0.141352	0.000137398	1497.54	30.4512	0.0327988	0.0117861	0.135457	0.000138911	0.841164	0.525642	0.254679	0.287128	0.243607	0.283705	0.252707	0.229003	0.243864	0.316411	0.275141	0.282509	0.325653	0.326961	0.273065	0.258002	0.301926	0.310813	0.245435	0.226854	0.293639	0.330817	0.283082	0.276547	0.334858
817	192	345	370	369	0.237151	7387.5	1.56611	3.44538	0.042735	185.127	45.324	0	2502.09	39.4773	0.0256659	0.00938586	0.0744516	8.80943e-05	2447.18	38.9762	0.0253932	0.0093975	0.094589	8.83131e-05	0.265096	0.712214	0.22814	0.229989	0.229097	0.243728	0.190452	0.179621	0.225861	0.28288	0.229332	0.224675	0.248003	0.240664	0.221302	0.261294	0.301526	0.281533	0.180668	0.230811	0.322065	0.364941	0.273563	0.266271	0.285559
829	255	255	375	370	0.241007	7385	3.26829	3.67832	0.0212766	183.553	42.2021	0	1570.24	30.9654	0.0330217	0.0111425	0.189281	0.000124155	1538.38	30.6914	0.0326967	0.0111252	0.204809	0.00012377	0.158679	0.244173	0.252904	0.25731	0.257745	0.300476	0.287603	0.268186	0.308517	0.330662	0.274355	0.272326	0.34352	0.335488	0.330628	0.305252	0.39424	0.354311	0.272567	0.252074	0.357925	0.355271	0.288532	0.299699	0.369404
822	255	232	386	441	0.388234	9899	1.34669	3.28188	0	170.633	40.9824	0	1966.44	34.7534	0.0300781	0.00985128	0.149224	9.70477e-05	2042.34	35.5379	0.0291013	0.00982388	0.115186	9.65087e-05	0.513679	0.0145009	0.273725	0.268218	0.268531	0.293825	0.192089	0.148108	0.273223	0.33302	0.246329	0.22387	0.299749	0.272365	0.196549	0.256862	0.394522	0.332136	0.182732	0.236437	0.394504	0.374833	0.29147	0.303131	0.322647
825	236	241	388	389	0.405602	6895.5	1.22715	3.70297	0.010101	168.217	44.4776	0	2814.68	41.9749	0.0230553	0.00913091	0.0634528	8.33735e-05	2779.64	41.8327	0.0246091	0.00911856	0.0708076	8.31481e-05	0.330582	0.415485	0.241055	0.263609	0.276337	0.321503	0.285607	0.226502	0.256086	0.327057	0.295876	0.287126	0.335278	0.304963	0.227031	0.253658	0.34994	0.337104	0.221038	0.209014	0.331788	0.38654	0.343898	0.258845	0.306424
9	626	618	887	914	0.431627	279908	1.17448	3.61215	0.0125	103.186	601.686	0.552023	336.873	14.0302	0.0742002	0.0214022	0.349974	0.000458054	335.064	13.9785	0.0744623	0.0214289	0.352578	0.000459196	0.246243	0.295477	0.098736	0.105164	0.11614	0.119779	0.108474	0.076551	0.061002	0.075384	0.087615	0.106176	0.126588	0.143893	0.116091	0.120085	0.138613	0.129527	0.105886	0.124542	0.135694	0.113693	0.064598	0.070652	0.108009
26	709	704	1016	990	0.460095	392650	1.05727	3.66835	-0.00126422	100.832	624.832	0.592909	343.104	14.2238	0.0732116	0.021083	0.320427	0.000444492	339.159	14.1438	0.0736013	0.021118	0.328229	0.000445969	0.990239	0.0280436	0.107284	0.11157	0.123202	0.149813	0.156055	0.110335	0.098157	0.120951	0.133483	0.105043	0.079756	0.078604	0.06696	0.085479	0.114852	0.131547	0.124463	0.102964	0.106133	0.110291	0.092301	0.063238	0.097268
24	754	779	1148	1047	0.397912	511176	1.48854	3.7105	-0.0010627	105.794	509.166	0.52186	199.487	10.8367	0.0948551	0.0284106	0.232219	0.000807163	192.411	10.6698	0.0951168	0.028525	0.25942	0.000813677	0.55053	0.0125014	0.103449	0.121935	0.152328	0.164449	0.172319	0.162928	0.145872	0.141289	0.127308	0.118688	0.120711	0.141507	0.134042	0.116352	0.102646	0.125256	0.141949	0.143312	0.128832	0.123851	0.110219	0.105459	0.098983
10	684	674	940	921	0.386094	312156	1.02557	3.60627	-0.00956284	107.397	627.697	0.406876	377.298	14.9913	0.06875	0.020443	0.237657	0.000417915	369.283	14.8529	0.0693409	0.0204928	0.253689	0.000419955	0.20535	0.204933	0.098111	0.097328	0.099806	0.092924	0.085742	0.080423	0.093865	0.101878	0.100421	0.115065	0.149972	0.174332	0.120896	0.113167	0.110766	0.147021	0.121722	0.124953	0.11631	0.126097	0.082031	0.053614	0.049473
17	543	540	909	920	0.423849	276438	1.43874	3.67236	-0.0046729	112.022	414.171	0.298476	1401.27	28.8177	0.0367746	0.0106864	0.247628	0.0001142	1410.39	28.9082	0.037111	0.010683	0.242495	0.000114127	0.391096	0.895607	0.110494	0.116776	0.138778	0.14318	0.148803	0.137494	0.098608	0.079644	0.07714	0.118512	0.139326	0.16768	0.130121	0.12489	0.127699	0.127706	0.10582	0.101862	0.137173	0.13605	0.08574	0.048007	0.094058
14	1004	871	1263	1590	0.388417	951012	2.15711	3.64706	0.000785546	85.7205	543.668	0.750085	143.333	8.89357	0.11724	0.0347336	0.480951	0.00120642	152.531	8.98827	0.117094	0.0347042	0.447313	0.00120438	0.100214	0.695974	0.103877	0.134348	0.131817	0.125597	0.098979	0.087682	0.088438	0.090388	0.069858	0.064631	0.068369	0.083425	0.094385	0.112648	0.138895	0.148035	0.113615	0.108349	0.132202	0.132616	0.090664	0.06971	0.099565
592	379	383	595	602	0.692959	72789.5	1.91405	3.70438	0.00367647	112.979	317.689	0.236298	239.573	11.8239	0.0860072	0.0241997	0.637821	0.000585627	233.579	11.7157	0.0868782	0.024252	0.648349	0.00058816	0.91816	0.594581	0.190749	0.179777	0.190896	0.176303	0.178966	0.138794	0.165715	0.141061	0.111615	0.126566	0.208017	0.231122	0.233877	0.233837	0.262864	0.206584	0.194609	0.207328	0.259063	0.266635	0.220403	0.214879	0.175739
619	404	398	563	593	0.675833	63507	3.29401	3.61957	0.0255474	121.814	615.708	0.212906	962.964	24.0928	0.0427502	0.012117	0.553092	0.000146821	960.118	24.0118	0.0428866	0.0121388	0.554432	0.000147351	0.596404	0.597546	0.245246	0.274005	0.277749	0.283713	0.267871	0.2252	0.246653	0.243289	0.175861	0.163538	0.250338	0.286078	0.284397	0.311836	0.305607	0.266729	0.239363	0.262958	0.280337	0.29048	0.259594	0.299108	0.256276
621	418	418	611	592	0.733089	72019	1.26039	3.70111	0.00371747	121.437	251.607	0.112082	489.719	17.0268	0.0605089	0.0179	0.547181	0.000320409	479.87	16.8773	0.0607731	0.0179433	0.556604	0.000321962	0.649501	0.0926619	0.203092	0.22995	0.246955	0.243816	0.226802	0.200227	0.228281	0.181075	0.169128	0.161487	0.248916	0.287689	0.319321	0.270751	0.254154	0.226256	0.222132	0.218226	0.235514	0.239439	0.233221	0.263279	0.266873
663	378	386	563	590	0.665679	61875.5	9.40534	3.51799	-0.0289855	109.302	428.005	0.350543	897.922	23.0459	0.045288	0.012839	0.668498	0.00016484	899.442	23.0451	0.0452846	0.0128383	0.668141	0.000164823	0.896426	0.77003	0.125196	0.151796	0.177018	0.173955	0.158576	0.128674	0.123685	0.107476	0.091281	0.165429	0.220192	0.22509	0.210554	0.264323	0.267869	0.23111	0.19316	0.200595	0.209624	0.203949	0.189361	0.20903	0.175001
578	394	385	647	628	0.697307	92196.5	1.08477	3.40532	0.00334448	92.5241	978.081	0.427012	437.577	15.6064	0.0698722	0.0172468	0.752208	0.000297454	435.715	15.5735	0.0704368	0.0172683	0.753542	0.000298195	0.485149	0.975834	0.19025	0.20976	0.240619	0.242305	0.247921	0.214139	0.236947	0.221097	0.19232	0.202653	0.232625	0.259639	0.268953	0.297167	0.27189	0.214817	0.196186	0.230468	0.296119	0.30864	0.28508	0.282061	0.220196
614	347	391	545	569	0.509924	53042.5	3.56255	3.89928	-0.00362319	138.127	291.356	0.0167036	1290.61	28.0504	0.0365254	0.0108242	0.437651	0.000117163	1257.16	27.67	0.0367846	0.0108468	0.453114	0.000117653	0.812326	0.783748	0.194832	0.238744	0.240976	0.219896	0.231758	0.188355	0.23293	0.193838	0.11832	0.09452	0.20481	0.246449	0.246754	0.249771	0.269007	0.213179	0.188459	0.20971	0.273921	0.299544	0.226445	0.183096	0.139444
27	580	576	875	867	0.793918	258318	1.02548	3.73663	0.00596421	50.3476	367.77	0.953443	174.645	9.67462	0.115372	0.0306432	0.792908	0.000939007	173.908	9.64476	0.115794	0.0306804	0.793938	0.000941286	0.0300936	0.475249	0.140399	0.162566	0.189966	0.214539	0.226221	0.160201	0.130587	0.139197	0.151582	0.121019	0.122989	0.170043	0.170411	0.149441	0.13095	0.140579	0.158493	0.188098	0.236491	0.208341	0.110647	0.073037	0.135546
28	592	592	864	858	0.797186	250375	1.00904	3.51663	0	50.4352	358.919	0.954209	554.62	17.5035	0.0654	0.0167728	0.780285	0.000281327	548.486	17.4076	0.0657604	0.0167959	0.782833	0.000282101	0.339099	0.23536	0.134377	0.136442	0.113462	0.106988	0.09903	0.082984	0.094394	0.107573	0.121058	0.113372	0.109966	0.100751	0.100286	0.120768	0.11362	0.119278	0.11384	0.132856	0.125463	0.119477	0.089691	0.087987	0.096162
29	546	535	885	910	0.81727	281663	1.0437	3.58094	0.00361011	47.0453	341.469	0.964916	205.605	10.1019	0.115831	0.0314636	0.866436	0.000989958	205.339	10.0909	0.116771	0.0314843	0.86676	0.000991262	0.820969	0.56423	0.096812	0.143493	0.165688	0.174138	0.177579	0.144008	0.103547	0.076268	0.093536	0.158111	0.22347	0.232685	0.201692	0.212033	0.160742	0.106658	0.114488	0.194021	0.171109	0.146783	0.081157	0.087546	0.095276
30	531	534	896	902	0.806582	283626	1.05763	3.42441	-0.00365631	47.8886	336.012	0.962158	372.155	13.6688	0.0875682	0.0234096	0.8698	0.000548008	364.426	13.5684	0.088377	0.0234574	0.872618	0.00055025	0.458821	0.567532	0.176914	0.198741	0.179817	0.213055	0.239972	0.197968	0.193147	0.177851	0.193329	0.237895	0.341035	0.374085	0.229023	0.232469	0.265034	0.306335	0.231546	0.256064	0.287593	0.279741	0.165557	0.107951	0.181432
48	250	237	377	352	0.563988	2915	1.06479	3.47945	0.028169	131.938	329.226	0.0133791	1376.5	28.8452	0.0373776	0.0103389	0.720054	0.000106893	1325.25	28.5086	0.0355166	0.010397	0.730942	0.000108098	0.363897	0.514893	0.213113	0.213372	0.209393	0.215005	0.300346	0.269425	0.170667	0.122926	0.198219	0.270325	0.308018	0.357799	0.31032	0.347422	0.362045	0.32782	0.2914	0.26411	0.315494	0.231499	0.193115	0.254498	0.431369
44	313	311	464	442	0.520846	16577	1.21408	3.69388	-0.00689655	97.4825	609.828	0.608735	726.024	20.3583	0.0521052	0.013771	0.801298	0.00018964	691.151	19.9677	0.0522272	0.0138428	0.811075	0.000191623	0.116125	0.565739	0.228969	0.272007	0.368168	0.421005	0.349768	0.18914	0.176065	0.248834	0.287029	0.226384	0.248041	0.282626	0.309909	0.323219	0.296034	0.252716	0.262654	0.305056	0.344208	0.25438	0.193189	0.183189	0.329497
35	252	251	396	394	0.439767	4833	1.02088	3.75824	-0.011236	134.948	705.043	0.163046	1331.11	28.1703	0.0380231	0.0102387	0.701533	0.000104832	1279.84	27.7687	0.039831	0.0103111	0.71289	0.000106319	0.754523	0.85513	0.243719	0.296363	0.30806	0.300767	0.274823	0.243825	0.28925	0.228314	0.191927	0.203967	0.353414	0.419548	0.326494	0.317137	0.338454	0.384055	0.268401	0.280373	0.309174	0.365375	0.284433	0.316352	0.371305
60	336	476	346	426	0.559916	4315	1.17179	5.27027	-0.0571429	89.387	591.471	0.692932	809.657	21.6086	0.0495919	0.0124522	0.873653	0.000155058	850.452	22.3642	0.0457344	0.0123255	0.867415	0.000151919	0.345904	0.0813263	0.259116	0.296259	0.249583	0.295136	0.317035	0.249724	0.194823	0.237246	0.266312	0.297972	0.33875	0.392565	0.363254	0.306789	0.29602	0.277613	0.248173	0.239081	0.337761	0.340737	0.254105	0.256287	0.39206
66	271	256	399	387	0.759051	6362.5	1.14732	3.69118	0	79.6655	569.386	0.759921	798.272	21.7	0.0502837	0.0114896	0.842522	0.000132011	815.659	22.1082	0.0464334	0.0114433	0.839057	0.000130948	0.508437	0.605107	0.340528	0.380253	0.427529	0.437118	0.369435	0.283474	0.23688	0.270548	0.315759	0.347381	0.321027	0.333498	0.315935	0.335815	0.3147	0.251272	0.241286	0.331858	0.462819	0.421424	0.330289	0.292072	0.381357
56	241	276	346	339	0.702829	5349	1.82161	3.02326	0.0731707	153.16	314.886	0.00972144	1523.99	30.532	0.0347812	0.0112889	0.651747	0.00012744	1466.67	30.0396	0.0347694	0.0113519	0.66367	0.000128866	0.432239	0.656378	0.277412	0.298856	0.319841	0.4119	0.443719	0.302354	0.17254	0.177205	0.263548	0.34473	0.385193	0.363779	0.30981	0.321646	0.32079	0.286118	0.316029	0.379437	0.447042	0.391237	0.294273	0.280526	0.388152
803	263	262	412	412	0.666366	10194	1.14688	3.8125	0.0638298	132.258	317.644	0.0335491	1965.81	34.772	0.0294529	0.00852748	0.495793	7.27179e-05	1953.61	34.5489	0.0296162	0.008581	0.497391	7.36336e-05	0.193055	0.367004	0.425258	0.358932	0.342143	0.318215	0.225806	0.19095	0.310999	0.40755	0.318092	0.317347	0.295261	0.269806	0.225595	0.284973	0.335821	0.339986	0.294997	0.348903	0.422151	0.371116	0.261835	0.245456	0.302179
850	296	294	470	469	0.553467	21574.5	1.05048	3.78689	-0.00552486	138.137	342.276	0.0385177	2209.74	37.0048	0.0274349	0.00813923	0.264411	6.6247e-05	2176.3	36.745	0.0277863	0.00817844	0.274629	6.68869e-05	0.0821107	0.783102	0.208417	0.225154	0.232026	0.273149	0.220589	0.155475	0.182618	0.250433	0.232096	0.221913	0.237804	0.217141	0.224301	0.23571	0.229777	0.176691	0.15726	0.158749	0.167306	0.164052	0.141501	0.100695	0.083888
751	322	322	526	523	0.572593	32655	1.01983	3.49537	0	91.0203	604.733	0.613199	1561.19	30.498	0.0352233	0.00871621	0.538612	7.59723e-05	1574.76	30.6288	0.0338201	0.00871033	0.53438	7.58699e-05	0.82653	0.812651	0.337232	0.295683	0.327255	0.304317	0.196142	0.15468	0.25311	0.339267	0.251049	0.252874	0.318725	0.259812	0.221792	0.24106	0.390575	0.356651	0.289091	0.249068	0.341349	0.323006	0.239464	0.194201	0.239939
792	263	262	419	418	0.736243	10598.5	1	3.2069	0.0352941	122.441	318.907	0.135585	1279.42	27.8398	0.0381156	0.0100653	0.646126	0.00010131	1285.8	27.8411	0.0381453	0.010032	0.644177	0.00010064	0.645798	0.401946	0.245317	0.218998	0.241687	0.250398	0.126861	0.191077	0.327072	0.373075	0.264893	0.247735	0.257267	0.232926	0.252815	0.254055	0.293105	0.27004	0.2234	0.237929	0.310734	0.291873	0.230647	0.186484	0.238773
773	252	252	390	391	0.675305	7309	1	3.98718	-0.0131579	137.999	254.314	0	1022.82	24.754	0.0411306	0.0116438	0.479592	0.000135579	1046.04	24.9884	0.0414611	0.0116565	0.466325	0.000135874	0.49504	0.0209257	0.168788	0.159654	0.183094	0.197135	0.137125	0.121863	0.152259	0.21534	0.163558	0.162164	0.160024	0.170672	0.166896	0.182971	0.214998	0.186619	0.147651	0.162445	0.205392	0.180425	0.11739	0.073311	0.065485
877	272	271	431	429	0.645141	13491.5	2.06352	3.64384	0.0208333	127.84	315.592	0.0680428	1796.17	32.9732	0.0315484	0.00863068	0.551205	7.44887e-05	1784.43	32.9406	0.031894	0.00868587	0.553686	7.54444e-05	0.440062	0.76214	0.225761	0.235607	0.230477	0.294418	0.224265	0.145507	0.176734	0.265386	0.259213	0.214335	0.205096	0.186808	0.215236	0.264582	0.279244	0.252448	0.18864	0.186879	0.238645	0.252719	0.198852	0.185697	0.195006
[truncated: 732 more columns]

## Sheet: Mixture 3
Table S4 Colony information of Mixture 3
index	x_micro	y_micro	nWidth	nHeight	Feature1	Feature2	Feature3	Feature4	Feature5	Feature6	Feature7	Feature8	Feature9	Feature10	Feature11	Feature12	Feature13	Feature14	Feature15	Feature16	Feature17	Feature18	Feature19	Feature20	Feature21	Feature22	Raman0	Raman1	Raman2	Raman3	Raman4	Raman5	Raman6	Raman7	Raman8	Raman9	Raman10	Raman11	Raman12	Raman13	Raman14	Raman15	Raman16	Raman17	Raman18	Raman19	Raman20	Raman21	Raman22
888	266	264	420	422	0.726209	10846	1.01629	3.28713	-0.010101	120.419	414.483	0.193528	1530.33	30.2978	0.0342246	0.00892135	0.634143	7.95905e-05	1495.63	29.9426	0.0344859	0.00895089	0.64209	8.01184e-05	0.392118	0.296463	0.181748	0.179246	0.177306	0.194729	0.183521	0.171817	0.178331	0.20291	0.177819	0.180605	0.213618	0.266259	0.215583	0.203807	0.205077	0.207399	0.180453	0.196321	0.221255	0.195442	0.180378	0.230302	0.254309
1076	262	261	415	416	0.736233	9997	1.01414	3.7963	-0.00943396	114.178	409.872	0.306892	1426.81	29.3861	0.03476	0.00906107	0.717485	8.2103e-05	1424.23	29.4145	0.0355216	0.00907501	0.717812	8.23559e-05	0.744781	0.860543	0.132144	0.15565	0.189461	0.17946	0.15937	0.156863	0.179179	0.19819	0.183693	0.161588	0.1647	0.195818	0.181052	0.150997	0.137575	0.175436	0.186695	0.173615	0.138397	0.130511	0.126993	0.190087	0.216979
945	279	278	409	408	0.747184	8779	1.01305	3.53271	-0.0666667	124.468	380.808	0.101378	1566.03	30.5484	0.033741	0.0090624	0.625465	8.2127e-05	1514.02	30.2138	0.0338348	0.00909292	0.637308	8.26812e-05	0.763683	0.872735	0.140198	0.165545	0.19762	0.268111	0.211009	0.130352	0.117213	0.198029	0.206352	0.169485	0.166543	0.215181	0.213802	0.232148	0.299538	0.328197	0.278311	0.253895	0.283834	0.229951	0.207857	0.233124	0.270002
1070	257	255	405	408	0.753625	8432.5	1.02662	3.59223	0.00990099	118.895	365.225	0.196857	1210.11	26.8832	0.039087	0.0102347	0.720251	0.00010475	1227.95	26.9288	0.0387404	0.0102516	0.716343	0.000105096	0.717758	0.480976	0.166042	0.183416	0.179494	0.219276	0.190799	0.152638	0.138607	0.174135	0.176971	0.187737	0.203499	0.216807	0.193182	0.240531	0.336183	0.325705	0.272018	0.318243	0.340818	0.21105	0.109837	0.19316	0.268201
996	253	253	399	400	0.727859	7517	1.01371	3.31183	0.021978	124.89	352.506	0.0803512	720.026	20.6971	0.0491413	0.0123291	0.688556	0.000152008	750.407	20.8092	0.0512483	0.012434	0.675122	0.000154605	0.521533	0.00779298	0.179797	0.188686	0.185964	0.205802	0.17121	0.15224	0.166527	0.171907	0.196442	0.146042	0.201381	0.232676	0.232335	0.210029	0.318504	0.324485	0.221817	0.239656	0.309276	0.22991	0.117927	0.147897	0.20711
990	269	269	400	400	0.714852	7576	1.0495	3.56471	0.0120482	124.82	355.977	0.0807814	1368.56	28.8058	0.0348642	0.00941051	0.71585	8.85578e-05	1398.91	28.9915	0.0353807	0.00941702	0.709455	8.86803e-05	0.354265	0.593238	0.154542	0.168422	0.164306	0.168591	0.173708	0.174532	0.166208	0.171508	0.178579	0.161899	0.149161	0.189923	0.206218	0.261653	0.301568	0.28889	0.236551	0.249025	0.269991	0.209654	0.151104	0.200438	0.262111
894	276	276	444	442	0.724463	15236.5	1.01163	3.4359	0.00649351	110.412	439.563	0.380074	833.271	22.1893	0.0488858	0.0114149	0.700815	0.0001303	836.54	22.3353	0.0457822	0.0113907	0.699539	0.000129748	0.737995	0.553714	0.149513	0.140231	0.159079	0.239803	0.228874	0.185322	0.16764	0.200521	0.193827	0.169034	0.168965	0.193355	0.163935	0.217482	0.318251	0.326443	0.241082	0.273989	0.356377	0.261742	0.180534	0.205318	0.261964
965	276	276	418	418	0.760377	10191	1.01428	3.31	-0.0816327	114.761	407.627	0.291335	1144.06	26.3242	0.0385824	0.00996092	0.742513	9.922e-05	1146.5	26.2785	0.038929	0.00998093	0.742045	9.9619e-05	0.357398	0.117518	0.113123	0.12905	0.168714	0.187043	0.169055	0.152137	0.140497	0.163224	0.166247	0.178496	0.185036	0.201793	0.16456	0.205375	0.258571	0.268102	0.225886	0.231473	0.248113	0.195023	0.175915	0.176106	0.182589
954	254	254	391	392	0.768138	6267.5	1.03758	3.29333	0	124.784	375.116	0.0976466	1364.86	28.6672	0.0356567	0.00965509	0.728478	9.32207e-05	1359.73	28.5384	0.0371272	0.00962888	0.729484	9.27153e-05	0.594432	0.363028	0.174374	0.180959	0.18588	0.192257	0.154733	0.130339	0.148055	0.1917	0.217789	0.194164	0.182542	0.206544	0.234828	0.278115	0.360792	0.322114	0.283696	0.297337	0.364913	0.252987	0.205887	0.246804	0.281217
1023	249	250	396	397	0.758707	6696.5	1.00836	3.67164	0.0153846	124.928	357.791	0.0713806	1270.26	27.6904	0.0380142	0.0100154	0.732921	0.000100308	1274.7	27.6025	0.0399289	0.0100521	0.732031	0.000101044	0.457412	0.611599	0.219564	0.22162	0.214883	0.189322	0.167979	0.164601	0.200884	0.226405	0.213127	0.164094	0.15399	0.189577	0.196276	0.232254	0.267341	0.284749	0.24448	0.242052	0.239652	0.179951	0.166901	0.191181	0.23898
1061	266	265	419	419	0.755226	10584.5	1.06102	3.68085	-0.0217391	114.663	388.834	0.288252	1272.05	27.5194	0.0401619	0.0095643	0.726935	9.14759e-05	1263.5	27.4453	0.0382646	0.00956829	0.728571	9.15522e-05	0.2014	0.978697	0.229624	0.234906	0.222041	0.216164	0.200957	0.175598	0.17929	0.207617	0.19481	0.178297	0.186313	0.2079	0.200749	0.221382	0.316746	0.337219	0.305055	0.268311	0.305271	0.252962	0.192932	0.229761	0.276121
1049	258	257	407	410	0.745879	9171	1.87598	3.28283	-0.0206186	115.31	426.256	0.297787	1196.58	26.4436	0.03923	0.0103532	0.740385	0.00010719	1189.36	26.3289	0.0394743	0.0103937	0.74215	0.00010803	0.751644	0.595286	0.159128	0.222478	0.183199	0.124781	0.1164	0.138498	0.139794	0.130039	0.155584	0.174253	0.219908	0.248527	0.22597	0.194843	0.197708	0.226912	0.243447	0.248203	0.231372	0.20649	0.210628	0.231127	0.250536
173	1119	1122	1645	1630	0.735117	1.39118e+06	1.00472	3.73718	-0.000802568	42.1608	263.858	0.976599	96.8006	7.26606	0.149052	0.0418153	0.601404	0.00174852	96.4302	7.2361	0.149506	0.0418792	0.602984	0.00175387	0.411569	0.953355	0.065868	0.085039	0.086322	0.108751	0.096127	0.093308	0.118232	0.153862	0.154372	0.124238	0.126683	0.135327	0.153039	0.147565	0.150049	0.127918	0.117244	0.121826	0.143378	0.167308	0.164334	0.167643	0.162868
174	1117	1121	1644	1629	0.723625	1389280	1.00331	3.60537	0.00158103	42.0965	264.295	0.976797	84.4977	6.78318	0.158393	0.0447442	0.600944	0.00200205	84.5284	6.75864	0.159009	0.0448105	0.600839	0.00200798	0.481026	0.30865	0.113726	0.104418	0.106268	0.154271	0.153566	0.140259	0.178429	0.225876	0.187801	0.150927	0.168505	0.208188	0.204225	0.213971	0.212561	0.143968	0.102974	0.166951	0.249999	0.229015	0.183311	0.174956	0.163791
175	957	1057	1876	1660	0.669623	1698882	2.02858	3.59797	-0.00290698	54.6115	285.201	0.965208	153.954	9.01358	0.12177	0.0352736	0.634945	0.00124423	151.64	8.9587	0.122237	0.0353243	0.640382	0.00124781	0.181629	0.548634	0.088512	0.104761	0.092881	0.108147	0.111383	0.108209	0.133726	0.160233	0.145212	0.121655	0.146295	0.147053	0.132217	0.12238	0.14385	0.115868	0.098814	0.108235	0.127349	0.12326	0.124697	0.121145	0.099713
176	963	966	1368	1378	0.713117	905234	1.01868	3.52799	-0.000967118	48.1505	322.527	0.978994	201.02	10.5312	0.105536	0.0284586	0.584	0.000809894	200.032	10.4974	0.106146	0.0285088	0.586075	0.000812752	0.321319	0.146813	0.064696	0.078335	0.086998	0.119702	0.116806	0.116129	0.128793	0.162998	0.153486	0.140967	0.157451	0.175682	0.163655	0.158151	0.165433	0.131243	0.093525	0.144574	0.189466	0.182779	0.155804	0.164686	0.142954
177	988	988	1462	1462	0.709094	1.0464e+06	1.00577	3.55795	0	43.9215	301.131	0.971667	148.706	8.99465	0.122763	0.033636	0.59317	0.00113138	146.555	8.93626	0.123471	0.0337075	0.599119	0.00113619	0.845533	0.436895	0.086996	0.090158	0.089529	0.126467	0.128045	0.114981	0.117626	0.152519	0.129577	0.11687	0.141867	0.164999	0.145015	0.130949	0.145683	0.127453	0.108298	0.121448	0.161192	0.179886	0.163686	0.142027	0.117988
178	516	524	787	763	0.654784	170600	1.05886	3.63288	-0.00226244	61.4792	708.452	0.871263	672.79	19.6186	0.0563699	0.0143053	0.573345	0.000204642	664.884	19.5253	0.0566986	0.0143141	0.578609	0.000204894	0.186904	0.261121	0.112558	0.122732	0.122535	0.120601	0.135818	0.133699	0.143387	0.172343	0.137708	0.105468	0.112883	0.155214	0.134381	0.12662	0.135366	0.111996	0.086975	0.13153	0.185362	0.190739	0.145471	0.127744	0.092815
179	1427	1459	2062	2080	0.710452	2470110	1.02183	3.56542	-0.000592768	49.3487	176.73	0.979355	204.843	10.353	0.107301	0.0312421	0.68934	0.000976068	203.458	10.309	0.107842	0.0312878	0.691468	0.000978928	0.417291	0.3488	0.066257	0.084923	0.082617	0.079758	0.087485	0.093447	0.115652	0.130735	0.10529	0.083054	0.101792	0.128591	0.123432	0.12419	0.137922	0.118283	0.082395	0.108394	0.141317	0.123611	0.105768	0.127629	0.128214
180	1212	1206	1710	1713	0.71863	1554579	3.14854	3.52889	0.00074184	44.7456	272.74	0.973598	135.679	8.54819	0.129289	0.0358403	0.592786	0.00128453	135.775	8.53496	0.129752	0.0358878	0.59251	0.00128793	0.989035	0.803366	0.11954	0.169515	0.150824	0.132826	0.132866	0.130991	0.147802	0.164624	0.142859	0.128142	0.144846	0.149809	0.15765	0.177832	0.189174	0.109623	0.068997	0.148371	0.223275	0.211679	0.1667	0.170908	0.132459
181	1091	1087	1728	1722	0.655706	1599503	1.01546	3.65199	0.000723066	48.8714	333.756	0.959672	70.8507	6.14717	0.172712	0.0503383	0.544192	0.00253395	70.2737	6.12238	0.173688	0.0504164	0.547946	0.00254182	0.2366	0.80323	0.079126	0.095573	0.076328	0.075051	0.081963	0.088803	0.101667	0.137015	0.117344	0.092279	0.084532	0.118489	0.126287	0.135636	0.130309	0.096802	0.072321	0.11022	0.157325	0.159133	0.124617	0.119283	0.107207
182	1160	1157	1649	1660	0.664951	1.43815e+06	1.04114	3.66422	-0.00220264	48.7245	357.014	0.955558	242.635	11.6423	0.0957969	0.0257427	0.469743	0.000662685	241.406	11.6044	0.096109	0.0257791	0.472419	0.00066456	0.916832	0.704506	0.072557	0.071924	0.073163	0.11436	0.118066	0.103245	0.112159	0.151674	0.132747	0.103188	0.123003	0.151805	0.14934	0.133605	0.117997	0.082513	0.076081	0.109388	0.133385	0.118721	0.118626	0.129889	0.130388
341	263	264	410	409	0.658602	9861	1.00073	3.20635	-0.0645161	142.638	252.369	0.00010141	967.981	24.3145	0.0417873	0.0118367	0.407849	0.000140108	977.689	24.3487	0.0427338	0.0118132	0.401138	0.000139552	0.980582	0.0216027	0.117236	0.098063	0.120268	0.163988	0.179977	0.158199	0.137659	0.158175	0.160387	0.127535	0.144891	0.168884	0.186562	0.160195	0.150451	0.106857	0.119293	0.148846	0.161943	0.136598	0.113843	0.091084	0.095465
367	263	262	411	410	0.702223	9616.5	1.00478	3.56989	-0.0769231	136.95	212.216	0	1940.44	34.5655	0.02884	0.00888201	0.425285	7.88901e-05	1914.56	34.3428	0.0282161	0.00892186	0.432391	7.95996e-05	0.236462	0.268314	0.176655	0.262861	0.203373	0.154933	0.128464	0.181433	0.190948	0.256553	0.239075	0.181608	0.163502	0.178647	0.199348	0.174703	0.187008	0.188871	0.161859	0.144942	0.142162	0.180997	0.147097	0.091109	0.067896
358	269	269	421	419	0.731544	10742	1.00521	3.62857	-0.00970874	134.629	294.634	0.000930925	1962.52	34.6868	0.0302928	0.00858687	0.521586	7.37343e-05	1954.93	34.5326	0.0311668	0.00862227	0.523233	7.43436e-05	0.191007	0.391699	0.184519	0.20831	0.205741	0.203631	0.164501	0.146446	0.161753	0.216264	0.2141	0.18436	0.152126	0.125972	0.152352	0.199944	0.231039	0.205483	0.190918	0.214661	0.202009	0.185999	0.141073	0.138842	0.118476
373	260	258	401	405	0.54768	9734	2.02527	3.83471	0	140.305	147.87	0	2271.33	37.4959	0.0272313	0.00884551	0.267532	7.82431e-05	2292.64	37.6782	0.0266243	0.0088497	0.25967	7.83173e-05	0.634442	0.951662	0.152544	0.180732	0.175708	0.184225	0.174134	0.18465	0.184538	0.219315	0.19988	0.148596	0.160154	0.221255	0.251716	0.214814	0.18808	0.158179	0.136755	0.1694	0.206309	0.203536	0.148662	0.110633	0.128771
345	272	273	429	429	0.636296	12738	1.00658	3.49231	0.0078125	145.209	204.806	0	1840.9	33.5823	0.0302258	0.00890752	0.440659	7.93439e-05	1830.57	33.4444	0.0308215	0.00891838	0.443487	7.95374e-05	0.484909	0.893047	0.161936	0.158287	0.112519	0.150298	0.175935	0.151053	0.118077	0.143516	0.161036	0.118887	0.141524	0.179134	0.201648	0.150505	0.141948	0.126998	0.124061	0.128089	0.134146	0.114466	0.100159	0.094059	0.108565
376	294	284	406	410	0.664147	8997	1.07077	3.48113	0	149.235	196.798	0	1548.94	30.7011	0.0336178	0.00974316	0.412341	9.49291e-05	1570.89	30.9267	0.0337356	0.00970554	0.403562	9.41976e-05	0.00594284	0.85703	0.152173	0.141343	0.137985	0.209736	0.232174	0.214534	0.190177	0.242556	0.245406	0.200218	0.187565	0.241234	0.256486	0.198331	0.161512	0.168463	0.167118	0.1646	0.170411	0.186644	0.155213	0.126691	0.126175
354	256	257	403	398	0.616957	8200.5	1.04237	4.00901	-0.00917431	156.553	192.333	0	1303.58	28.2825	0.0356247	0.0106021	0.384294	0.000112404	1265.99	27.7732	0.0376508	0.0106757	0.401304	0.000113971	0.208248	0.675941	0.182451	0.162386	0.144703	0.169269	0.186944	0.143439	0.165366	0.186836	0.237557	0.187643	0.210019	0.204757	0.228663	0.182532	0.184928	0.176181	0.195224	0.223497	0.234463	0.193556	0.135667	0.131438	0.161651
353	266	267	417	417	0.684978	10420	1.69518	4.05825	0.00990099	141.955	221.54	0	2250.3	37.104	0.0279176	0.0084072	0.418343	7.0681e-05	2269.22	37.3138	0.027904	0.00842076	0.411785	7.09093e-05	0.798846	0.693224	0.137404	0.131653	0.163976	0.192538	0.186342	0.170378	0.190618	0.193315	0.170222	0.105127	0.139011	0.142627	0.168413	0.158927	0.251547	0.248347	0.185079	0.166188	0.188718	0.17878	0.125833	0.090655	0.084337
360	283	284	422	419	0.710553	10860	1.01316	3.69298	0.0178571	129.91	312.879	0.0279926	1599.33	31.3527	0.0322456	0.00893794	0.577151	7.98867e-05	1632.28	31.6132	0.0318707	0.0088979	0.5679	7.91726e-05	0.65075	0.574674	0.15654	0.163227	0.151017	0.14614	0.133542	0.105911	0.12344	0.189837	0.17509	0.123719	0.126986	0.166148	0.187122	0.17618	0.178484	0.164651	0.1437	0.124317	0.126248	0.119453	0.110709	0.092159	0.082395
347	262	263	410	411	0.626753	9588	1.01499	3.50962	0.0588235	152.274	208.638	0	1869.59	33.8969	0.030788	0.00917231	0.400562	8.41313e-05	1873.1	34.0337	0.0297338	0.00916376	0.398067	8.39744e-05	0.375186	0.274669	0.124674	0.133988	0.135511	0.162668	0.140988	0.14221	0.144806	0.194961	0.174394	0.098295	0.123585	0.145908	0.183519	0.172755	0.258367	0.223604	0.165183	0.136031	0.155512	0.13448	0.099422	0.09518	0.113331
340	275	277	422	421	0.68518	11513.5	1.01024	3.7551	0.0208333	143.441	229.413	0	1990.16	34.9308	0.0288152	0.00872074	0.429889	7.60513e-05	1934.69	34.5408	0.0294446	0.00874365	0.44543	7.64514e-05	0.301947	0.248798	0.152893	0.157645	0.170892	0.186502	0.174282	0.163216	0.152098	0.165963	0.163983	0.167901	0.165252	0.14233	0.154373	0.193969	0.2377	0.193568	0.172565	0.159799	0.154057	0.125186	0.133947	0.159761	0.145604
332	276	274	419	420	0.636938	11097	1.85072	3.88889	0	146.498	207.36	0	1301.41	28.3154	0.0360335	0.0103378	0.461574	0.00010687	1344.64	28.6599	0.0352897	0.0103072	0.442892	0.000106239	0.313669	0.621845	0.128504	0.144857	0.1801	0.21578	0.19483	0.142341	0.156374	0.226337	0.21102	0.125228	0.137725	0.186265	0.205348	0.186528	0.274137	0.258604	0.187755	0.168588	0.174261	0.172391	0.126889	0.104288	0.078416
95	1034	1008	1257	1248	0.130013	556689	1.75538	3.66289	0.00252366	112.521	451.776	0.286666	186.441	10.5815	0.0934434	0.0297527	0.223723	0.000885223	184.34	10.5274	0.0937989	0.0297837	0.232813	0.000887066	0.721184	0.852417	0.074341	0.111562	0.126221	0.125291	0.108397	0.083486	0.068559	0.084039	0.086772	0.099199	0.110052	0.093519	0.068957	0.082244	0.103382	0.093958	0.069481	0.109284	0.115738	0.118565	0.053766	0.075468	0.082032
191	974	948	1357	1319	0.138375	661949	1.08452	3.70029	0.003544	92.8478	503.08	0.554884	658.615	20.0634	0.0511447	0.015537	0.15275	0.000241399	654.789	20.0071	0.0510863	0.0155518	0.157109	0.000241859	0.453089	0.831168	0.129484	0.140409	0.128664	0.116991	0.119598	0.123101	0.14655	0.169286	0.150199	0.123288	0.129511	0.145504	0.141029	0.14758	0.16708	0.125105	0.096742	0.121358	0.160712	0.14745	0.120719	0.111453	0.077714
94	1117	1186	1263	1253	0.154578	503289	1	3.7564	-0.0014652	111.197	385.653	0.289543	484.639	17.2632	0.0583785	0.0181791	0.130108	0.000330478	480.842	17.2047	0.058412	0.0181941	0.136808	0.000331026	0.0163925	0.0780861	0.135055	0.162704	0.177788	0.164348	0.135751	0.083205	0.095621	0.141084	0.173487	0.191414	0.203308	0.162009	0.110132	0.144841	0.160775	0.161223	0.104295	0.157766	0.182556	0.195938	0.070889	0.069937	0.110277
194	1525	1537	1876	1961	0.0607914	1.75451e+06	2.34112	3.71301	-0.00192864	110.911	679.153	0.3333	259.196	12.5731	0.0795451	0.0246928	0.168236	0.000609734	258.286	12.5473	0.0796895	0.024706	0.171026	0.000610387	0.948252	0.8047	0.052424	0.065808	0.056949	0.062013	0.083231	0.091582	0.097768	0.102004	0.079255	0.05748	0.07419	0.091968	0.089708	0.063067	0.063377	0.047951	0.035898	0.038986	0.065857	0.070759	0.064468	0.051272	0.041088
92	847	909	1096	1158	0.169478	468192	118.26	3.59323	-0.00247934	111.155	407.659	0.293937	232.667	11.9242	0.0831294	0.0264115	0.137526	0.000697567	228.904	11.8351	0.0836492	0.0264527	0.151191	0.000699743	0.123923	0.972633	0.09735	0.088572	0.123886	0.178368	0.165416	0.111525	0.105067	0.135536	0.161739	0.16353	0.150539	0.124734	0.126418	0.15072	0.157276	0.12472	0.090146	0.104659	0.132593	0.147129	0.095564	0.092025	0.114341
188	1133	1179	1553	1481	0.132227	806314	1.65172	3.70486	0.00054615	94.8505	422.487	0.519482	209.157	11.3091	0.0877521	0.0275608	0.150949	0.000759598	207.39	11.2578	0.0881165	0.0275912	0.158393	0.000761276	0.660952	0.0479301	0.108848	0.12974	0.110428	0.125333	0.124297	0.121207	0.134186	0.156868	0.136678	0.102296	0.127012	0.148066	0.156516	0.152398	0.168953	0.100748	0.040151	0.076538	0.169468	0.152716	0.093626	0.080757	0.09055
80	934	924	1130	1198	0.148174	473334	1	3.68134	0.00672646	118.611	403.932	0.20572	77.6782	6.65574	0.143359	0.0475199	0.279187	0.00225814	75.5617	6.63227	0.14334	0.047546	0.297029	0.00226062	0.971046	0.672826	0.085737	0.115799	0.128242	0.154243	0.144075	0.106039	0.102284	0.127477	0.139112	0.124192	0.122171	0.116115	0.115159	0.1198	0.118109	0.109274	0.091075	0.121232	0.133847	0.143369	0.065614	0.082295	0.108597
87	850	916	1097	1163	0.157783	453074	55.2194	3.6685	0	109.837	389.115	0.308824	229.378	11.8069	0.0841481	0.026698	0.155495	0.000712783	226.206	11.7254	0.0846945	0.026742	0.166957	0.000715132	0.929764	0.566436	0.07913	0.063233	0.070041	0.128022	0.131459	0.086007	0.076017	0.119318	0.158976	0.16087	0.164909	0.157445	0.137149	0.117719	0.086636	0.092738	0.088655	0.156603	0.175404	0.166286	0.052397	0.059121	0.115743
72	624	690	959	945	0.212526	249840	1.09109	3.66294	-0.00997506	112.732	407.903	0.286331	871.033	23.1775	0.0436567	0.0136798	0.104576	0.000187137	857.897	23.0182	0.0438386	0.0137065	0.117222	0.000187869	0.63205	0.139951	0.43986	0.340773	0.355388	0.379552	0.430753	0.258372	0.25376	0.27313	0.399637	0.345501	0.458765	0.456558	0.466806	0.37627	0.327093	0.302898	0.352109	0.345013	0.350087	0.347503	0.307556	0.225028	0.267567
93	824	809	1065	1103	0.139216	380716	1.15087	3.58814	0.00081367	123.973	411.162	0.157188	387.087	15.4569	0.0642369	0.0203675	0.119917	0.000414836	385.277	15.4132	0.0648572	0.0203838	0.123655	0.0004155	0.596487	0.918185	0.101825	0.151285	0.159793	0.154138	0.146071	0.093632	0.096327	0.114752	0.149717	0.140794	0.198581	0.194044	0.147016	0.117759	0.131422	0.128217	0.09967	0.101532	0.101898	0.096569	0.056452	0.08564	0.126088
76	855	842	1017	994	0.166552	283234	2.18137	3.69006	0.00195312	122.441	342.885	0.149918	494.187	17.443	0.0576031	0.0181214	0.124125	0.000328385	488.172	17.3401	0.0576228	0.0181493	0.134441	0.000329398	0.126958	0.088551	0.088202	0.093479	0.10432	0.13392	0.117581	0.083066	0.085621	0.114883	0.143398	0.15547	0.16005	0.148461	0.134797	0.135388	0.136866	0.14473	0.122588	0.141237	0.153204	0.147846	0.054016	0.040657	0.107612
71	749	736	953	1062	0.179248	254500	1.37236	3.70525	0.00107411	115.119	307.479	0.220432	645.13	19.9091	0.0507444	0.0159314	0.119815	0.00025381	637.054	19.7965	0.0508721	0.0159489	0.130408	0.000254368	0.293152	0.982217	0.10064	0.086758	0.093509	0.129038	0.146719	0.100312	0.098188	0.123635	0.153773	0.142781	0.14015	0.128965	0.121462	0.116609	0.117512	0.114853	0.108945	0.129217	0.137015	0.134225	0.073757	0.084192	0.119825
258	293	295	472	468	0.545496	22630.5	2.44867	3.59884	0.0352941	128.355	303.763	0.035704	1878.22	33.9643	0.0309576	0.00905564	0.207731	8.20045e-05	1863.45	33.9574	0.0297081	0.00905037	0.212561	8.19091e-05	0.422543	0.455818	0.032206	0.040681	0.070527	0.102895	0.111676	0.094415	0.091184	0.098785	0.107025	0.099157	0.095792	0.088147	0.089591	0.087614	0.108682	0.091195	0.067379	0.060567	0.076853	0.072628	0.082019	0.091129	0.070463
228	276	277	428	426	0.667171	15136.5	6.62577	3.69421	-0.0588235	133.543	279.045	0.000660655	824.33	22.4596	0.0453041	0.0125206	0.345816	0.000156766	858.57	22.9013	0.0449216	0.0124522	0.317718	0.000155056	0.927455	0.707929	0.06198	0.082287	0.085964	0.092241	0.085099	0.084527	0.080596	0.086837	0.07849	0.080122	0.084227	0.081172	0.072457	0.069597	0.082123	0.074344	0.058446	0.067578	0.078903	0.078549	0.085226	0.104322	0.071773
250	341	340	518	524	0.599296	35900.5	1.16736	3.51643	0.014218	107.967	405.953	0.390357	1938.48	34.3232	0.0305859	0.0083416	0.340914	6.95823e-05	1926.78	34.3453	0.0300619	0.00833263	0.344043	6.94326e-05	0.273842	0.888658	0.047691	0.073928	0.086046	0.087491	0.090368	0.087816	0.08495	0.084442	0.081161	0.081835	0.090634	0.090425	0.076956	0.088743	0.106181	0.086123	0.04997	0.063823	0.087619	0.086571	0.084581	0.081823	0.053894
259	320	322	509	504	0.545034	31212.5	1.46846	3.68519	0.00934579	118.774	347.142	0.197453	2089.32	35.7535	0.0283486	0.00834953	0.256324	6.97147e-05	2080.14	35.7295	0.0289777	0.00836965	0.259414	7.00511e-05	0.245033	0.768817	0.054585	0.086467	0.088039	0.079565	0.086222	0.100856	0.093687	0.085252	0.075073	0.089771	0.104588	0.109069	0.100894	0.085644	0.08275	0.070533	0.060167	0.076389	0.092268	0.083597	0.080869	0.091027	0.069244
246	326	324	458	456	0.616173	21618	1.70142	3.4	0	115.524	461.836	0.333703	2042.5	35.3291	0.0295138	0.0079655	0.350692	6.34492e-05	2085.28	35.8524	0.0286202	0.00794746	0.33576	6.31621e-05	0.937668	0.343487	0.064949	0.089441	0.091828	0.078336	0.085454	0.090808	0.09244	0.093982	0.089277	0.068406	0.073829	0.088492	0.09744	0.092069	0.113965	0.095367	0.064576	0.058094	0.08074	0.074516	0.077805	0.092313	0.073176
256	317	317	483	486	0.572295	26558	1.85896	3.68108	0.00546448	122.818	367.114	0.148204	2001.84	35.1407	0.0299655	0.00850016	0.25136	7.22527e-05	1983.6	34.9222	0.0291575	0.0085144	0.256967	7.24949e-05	0.709623	0.490369	0.048585	0.080959	0.077843	0.067668	0.077451	0.089435	0.086087	0.084993	0.090324	0.089312	0.08777	0.074121	0.071406	0.069085	0.100472	0.082066	0.052654	0.043802	0.06711	0.06023	0.072015	0.081231	0.050623
238	334	340	546	552	0.59414	45553.5	1.04266	3.34661	-0.0361446	101.626	552.613	0.478185	1566.73	30.7856	0.0336296	0.00916826	0.35668	8.4057e-05	1552.75	30.6412	0.0332845	0.00917924	0.36207	8.42585e-05	0.607529	0.037355	0.076832	0.105039	0.10549	0.11648	0.12597	0.121327	0.106588	0.112311	0.108172	0.12497	0.123901	0.11353	0.092469	0.091199	0.106779	0.097021	0.074791	0.062412	0.083841	0.084312	0.080711	0.078265	0.066616
281	299	298	480	477	0.591767	25779.5	1.84187	3.36612	-0.0331492	121.201	392.497	0.183479	1614.44	31.4501	0.0335529	0.00920186	0.344057	8.46742e-05	1614.16	31.5056	0.0329809	0.00920557	0.343622	8.47425e-05	0.200401	0.174895	0.055718	0.075648	0.093502	0.096044	0.105366	0.098451	0.101262	0.105237	0.096385	0.082833	0.093187	0.095067	0.099636	0.101124	0.11163	0.09015	0.068751	0.07583	0.095385	0.102433	0.098567	0.116136	0.085134
232	502	499	699	703	0.554027	123885	1.10664	3.72158	0	95.975	708.724	0.562578	689.795	20.3451	0.0511184	0.0146179	0.306258	0.000213682	692.766	20.3277	0.051213	0.0146205	0.303272	0.000213759	0.372396	0.499907	0.057541	0.089459	0.099188	0.103492	0.120368	0.109559	0.105199	0.100869	0.09838	0.097884	0.106068	0.105715	0.105126	0.100915	0.108318	0.08583	0.067574	0.09076	0.113802	0.094351	0.074387	0.102277	0.091592
240	314	295	445	449	0.59273	17767.5	2.98247	3.68047	0.011976	119.9	281.168	0.139356	2218.58	37.029	0.0260166	0.00799274	0.362991	6.38838e-05	2264.07	37.4988	0.0265255	0.00798192	0.348494	6.37111e-05	0.335544	0.865244	0.059792	0.082476	0.092627	0.106464	0.102403	0.105061	0.100766	0.108425	0.102798	0.109577	0.118235	0.109974	0.087998	0.103851	0.132181	0.110034	0.07168	0.080768	0.109023	0.103076	0.091647	0.087418	0.070433
277	301	300	480	483	0.575137	25114	1.14998	3.58571	0	115.386	372.232	0.270208	1895.76	33.9529	0.030881	0.00849662	0.337129	7.21926e-05	1877.69	33.8689	0.0302438	0.00849776	0.343858	7.2212e-05	0.580713	0.527617	0.033323	0.041801	0.045518	0.066391	0.074833	0.073014	0.068376	0.088492	0.085454	0.086763	0.085802	0.093603	0.085444	0.104017	0.121324	0.097187	0.055757	0.067315	0.092919	0.088286	0.08116	0.089082	0.066086
261	325	325	530	533	0.631125	41386.5	1.14342	3.60811	0.00454545	111.679	571.439	0.346417	599.621	19.0717	0.053532	0.0150582	0.357417	0.000226748	601.362	19.1094	0.0532211	0.0150488	0.355932	0.000226467	0.301053	0.680534	0.055826	0.073704	0.080079	0.094807	0.108799	0.113229	0.104479	0.099268	0.087408	0.09094	0.104575	0.113705	0.102731	0.094604	0.103572	0.088206	0.079139	0.096513	0.111092	0.097229	0.090351	0.101051	0.083772
207	455	453	800	805	0.827964	197424	1.01296	3.41649	-0.00424628	55.1316	248.308	0.96485	402.516	14.1584	0.0841528	0.0229241	0.888084	0.000525515	392.781	14.0214	0.0849217	0.0229621	0.89096	0.000527259	0.61766	0.0514655	0.107364	0.126522	0.101894	0.109074	0.117307	0.117493	0.129916	0.149378	0.119945	0.08972	0.132067	0.15926	0.156246	0.138479	0.157005	0.112942	0.082003	0.097545	0.128568	0.128678	0.099334	0.090402	0.056855
215	326	324	537	538	0.825413	43563	2.02799	3.42424	0	58.3518	361.965	0.943232	543.884	16.6897	0.0732473	0.0181399	0.902032	0.000329055	540.13	16.6214	0.0738423	0.0181774	0.902925	0.000330419	0.296902	0.542415	0.123289	0.123789	0.130313	0.181851	0.17113	0.166342	0.179173	0.24944	0.208242	0.154789	0.141453	0.178073	0.168964	0.174963	0.202545	0.163321	0.098575	0.147796	0.208862	0.208647	0.142189	0.13582	0.077239
199	373	373	543	531	0.848284	43576.5	1.06052	3.71698	-0.00952381	52.0491	414.643	0.950788	430.642	15.3355	0.0740409	0.019311	0.880548	0.000372913	418.003	15.1223	0.0749919	0.0193588	0.884262	0.000374763	0.0434181	0.938072	0.148659	0.160915	0.149475	0.174143	0.206968	0.20581	0.223625	0.252468	0.197661	0.163571	0.183914	0.25635	0.219727	0.206888	0.224306	0.179765	0.11973	0.154434	0.261671	0.243217	0.184503	0.141049	0.097706
223	315	314	521	526	0.852771	39438.5	1.04387	3.57416	0.00966184	59.0533	389.442	0.937282	487.27	15.9132	0.0746348	0.0188143	0.895163	0.000353976	470.102	15.7659	0.074122	0.0187886	0.899072	0.000353012	0.405653	0.955693	0.135969	0.144435	0.120678	0.11888	0.135085	0.152443	0.170223	0.217912	0.182279	0.150222	0.11649	0.175748	0.205947	0.215648	0.208407	0.153993	0.100679	0.151624	0.24496	0.232649	0.158594	0.143484	0.091769
210	331	335	543	534	0.849938	44933	1.0468	3.52308	0	51.3963	383.551	0.958182	477.743	15.5426	0.079835	0.0197571	0.908281	0.000390341	458.05	15.3216	0.0800195	0.01975	0.912252	0.000390064	0.206132	0.622204	0.156077	0.180741	0.145132	0.167779	0.156599	0.186801	0.183065	0.218352	0.170449	0.149368	0.174223	0.229409	0.231435	0.22287	0.220604	0.169128	0.121546	0.173876	0.222399	0.216758	0.168162	0.145144	0.105048
208	418	419	609	595	0.827304	72234.5	11.0183	3.47586	0.00694444	60.7821	308.724	0.944867	437.445	15.5696	0.0716189	0.0189402	0.840223	0.000358731	431.406	15.4581	0.0712005	0.0189652	0.842683	0.000359678	0.368875	0.214294	0.107428	0.113636	0.109601	0.14181	0.161907	0.164245	0.175271	0.173234	0.130909	0.11688	0.135842	0.158036	0.149749	0.155412	0.162226	0.141994	0.119047	0.157881	0.185852	0.167634	0.117346	0.122145	0.095355
212	315	316	517	523	0.848295	37863	1.03039	3.70283	0.00952381	56.2394	407.53	0.94076	471.738	15.9584	0.0718609	0.018367	0.888715	0.000337345	460.147	15.7923	0.072452	0.0184159	0.891667	0.000339147	0.361817	0.189203	0.138055	0.146052	0.15221	0.185017	0.179563	0.164174	0.180555	0.245469	0.202509	0.157382	0.176371	0.226615	0.209105	0.186471	0.217006	0.178917	0.132083	0.141988	0.207397	0.21188	0.173476	0.132636	0.082256
200	303	306	506	503	0.860463	32615	1.02011	3.54315	0	52.0424	390.351	0.955113	537.392	16.3983	0.077833	0.0191463	0.916121	0.000366581	510.1	16.1227	0.0770814	0.0191531	0.920555	0.000366841	0.707115	0.35536	0.156637	0.17617	0.173422	0.164989	0.147061	0.148667	0.162442	0.204153	0.152703	0.140991	0.145967	0.173439	0.189254	0.219305	0.224016	0.132447	0.093347	0.112179	0.143042	0.15114	0.135243	0.134509	0.08644
222	367	365	543	523	0.855513	42928.5	1.09375	3.53774	0	54.1473	370.952	0.953213	454.286	15.6695	0.0738593	0.0191022	0.874431	0.000364893	440.816	15.4895	0.0741303	0.0191099	0.878371	0.000365188	0.655923	0.269344	0.181653	0.217805	0.189088	0.203712	0.178711	0.177359	0.17765	0.254577	0.231536	0.204425	0.198235	0.214563	0.201689	0.211502	0.225976	0.157876	0.109044	0.140481	0.197903	0.191538	0.157281	0.152961	0.128359
204	301	305	506	502	0.858404	32242.5	1.08322	3.34615	0	52.1667	394.278	0.954268	470.746	15.9956	0.0726607	0.018741	0.876225	0.000351226	441.846	15.5586	0.0734936	0.0187958	0.884068	0.000353282	0.0406832	0.668018	0.118444	0.121203	0.114755	0.149359	0.156189	0.156498	0.161691	0.204092	0.176564	0.144596	0.142777	0.174957	0.166278	0.166469	0.161142	0.114493	0.072202	0.095058	0.15102	0.151257	0.120035	0.111907	0.090725
201	553	565	819	865	0.75078	226885	1.19351	3.70425	0.00371058	55.7428	267.639	0.965392	359.519	13.9841	0.0806689	0.0215505	0.831041	0.000464424	352.154	13.852	0.0816024	0.0215791	0.834523	0.000465656	0.483889	0.460432	0.08312	0.11756	0.103436	0.104294	0.098217	0.105418	0.103783	0.14326	0.126263	0.106433	0.105113	0.134329	0.141707	0.128956	0.138623	0.081589	0.052524	0.102944	0.16158	0.135557	0.082569	0.075321	0.043743
211	493	491	806	807	0.804821	203640	1.03527	3.4267	-0.0043956	60.4558	242.067	0.957938	482.513	16.0676	0.071193	0.0191617	0.846196	0.000367173	474.851	15.9467	0.0722377	0.0191935	0.848807	0.000368389	0.165066	0.193875	0.094177	0.085556	0.090942	0.106077	0.098009	0.097353	0.118679	0.146309	0.115607	0.094845	0.098912	0.126252	0.124437	0.156732	0.175435	0.120767	0.064486	0.110983	0.167235	0.160331	0.101999	0.079021	0.039735
717	2570	2564	952	859	0.524533	284880	3.26105	3.80775	0.00972447	89.0853	805.382	0.685631	339.781	14.0272	0.0758512	0.0206188	0.433846	0.000425136	331.65	13.8294	0.0767073	0.0207079	0.446875	0.000428817	0.248624	0.774779	0.083001	0.105122	0.109643	0.102179	0.088974	0.07439	0.078956	0.102879	0.114868	0.110547	0.109369	0.095489	0.082721	0.07816	0.09733	0.111016	0.101531	0.090889	0.09677	0.096002	0.081889	0.068616	0.074628
511	373	375	575	573	0.654929	49112.5	1.91087	3.58796	0	70.631	677.321	0.816228	1891.11	33.5019	0.0323904	0.00804589	0.38854	6.47364e-05	1889.52	33.4238	0.0331644	0.00805791	0.388783	6.49299e-05	0.645823	0.688207	0.101927	0.107875	0.156005	0.195421	0.175603	0.146069	0.159792	0.167842	0.12555	0.130824	0.188184	0.194864	0.18439	0.177543	0.249582	0.216462	0.175484	0.150302	0.224191	0.205661	0.152698	0.147494	0.145615
723	2587	2579	864	881	0.407917	231372	1.15105	3.70787	0.00161031	75.3503	1100.36	0.839421	620.128	19.0011	0.0569823	0.0151654	0.401333	0.000229989	605.49	18.8262	0.0569124	0.0152014	0.415489	0.000231083	0.520718	0.3161	0.125616	0.140206	0.138302	0.147399	0.122523	0.105543	0.106462	0.132825	0.105255	0.11431	0.133877	0.138773	0.115696	0.121421	0.13654	0.14388	0.134343	0.137779	0.164084	0.172043	0.128736	0.085699	0.079635
745	2520	2596	894	848	0.374924	231986	2.94732	3.71609	0	76.0817	1173.17	0.68623	587.067	18.5146	0.0587157	0.0155766	0.40398	0.00024263	575.929	18.3591	0.0587681	0.0156162	0.41532	0.000243866	0.516111	0.737467	0.115982	0.12892	0.146524	0.146019	0.11194	0.065673	0.099968	0.137397	0.118164	0.109831	0.133795	0.139284	0.129019	0.117988	0.114791	0.12225	0.124827	0.112794	0.101827	0.104912	0.090791	0.077215	0.073576
556	795	764	896	1294	0.242321	426720	1.32781	3.73304	0.00626118	85.0415	1140.01	0.619475	133.532	8.84895	0.113606	0.0337141	0.296347	0.00113664	132.65	8.85606	0.112903	0.0337029	0.300913	0.00113588	0.404739	0.245499	0.09824	0.112866	0.108435	0.111108	0.109619	0.085222	0.093826	0.088751	0.07459	0.083581	0.108084	0.12293	0.132179	0.15914	0.15664	0.140015	0.121973	0.114121	0.128622	0.132079	0.121779	0.110546	0.09899
495	453	446	669	653	0.554437	77347	2.40162	3.54434	0	71.907	900.442	0.764645	405.224	15.5236	0.0686621	0.018053	0.329085	0.000325912	403.229	15.5009	0.0676427	0.0180582	0.332324	0.000326099	0.46733	0.183975	0.172825	0.204113	0.216992	0.19625	0.176042	0.160604	0.202302	0.215899	0.178834	0.170293	0.219403	0.242107	0.233984	0.226	0.264227	0.242708	0.238258	0.225955	0.285253	0.244377	0.201371	0.20456	0.207587
562	779	850	1343	1034	0.508756	586651	1.50586	3.74947	-0.00211864	76.5887	804.372	0.760677	217.462	11.2826	0.0928127	0.0264699	0.327675	0.000700656	212.133	11.1401	0.093791	0.0265704	0.344109	0.000705984	0.284219	0.459717	0.07403	0.09209	0.088308	0.098942	0.112578	0.095196	0.096944	0.091717	0.07194	0.079806	0.112679	0.137188	0.137259	0.131021	0.134293	0.128616	0.113546	0.087393	0.108397	0.131646	0.119446	0.11846	0.092663
564	540	585	760	792	0.405615	150144	1.21141	3.6531	-0.0107527	81.9345	976.507	0.72173	1172.82	26.3718	0.0408483	0.0110101	0.334154	0.000121222	1178.18	26.4798	0.0407143	0.0109941	0.331374	0.00012087	0.522892	0.71951	0.070044	0.106355	0.121856	0.104408	0.090536	0.070979	0.08097	0.070163	0.068595	0.092753	0.133171	0.128703	0.12221	0.129978	0.144711	0.128193	0.109433	0.103397	0.128012	0.129136	0.092182	0.09434	0.093907
561	690	687	1001	1004	0.596425	379382	1.00692	3.6516	0.0102339	72.6978	825.42	0.784685	255.85	12.2433	0.0853116	0.0241606	0.361861	0.000583734	252.629	12.181	0.0858873	0.0242044	0.369785	0.000585854	0.147723	0.730335	0.114402	0.142776	0.144962	0.132567	0.107856	0.090322	0.109532	0.10617	0.09188	0.090473	0.126649	0.14057	0.14801	0.144799	0.137796	0.108133	0.098353	0.100815	0.135591	0.147141	0.127723	0.100319	0.09094
729	2520	2592	794	836	0.420308	179692	2.6221	3.61307	-0.00531915	71.4274	1100.93	0.751274	396.787	15.1331	0.0718354	0.0186505	0.436374	0.00034784	397.812	15.1341	0.0717812	0.0186605	0.435016	0.000348214	0.318435	0.971325	0.11855	0.140842	0.151577	0.157061	0.134764	0.094689	0.112132	0.141447	0.109411	0.088737	0.13223	0.162506	0.134397	0.108901	0.130498	0.13996	0.137347	0.141991	0.151851	0.154128	0.109364	0.099839	0.079763
485	419	573	738	809	0.401674	127244	1.49354	3.71224	-0.0122951	76.892	978.99	0.743288	770.29	21.3565	0.0499551	0.0132767	0.339157	0.000176271	761.376	21.2254	0.050421	0.0133121	0.346797	0.000177211	0.0934271	0.865493	0.135218	0.154259	0.149175	0.157464	0.12828	0.09732	0.138385	0.201	0.144534	0.120886	0.15825	0.185728	0.154592	0.173585	0.18844	0.175947	0.144641	0.167192	0.21829	0.231364	0.169571	0.175521	0.134586
522	424	442	682	636	0.598665	70544	1.20693	3.62791	0	57.9498	621.099	0.921524	1548.35	29.9408	0.0377559	0.00921984	0.356144	8.50055e-05	1526.74	29.7645	0.0383378	0.00922439	0.36519	8.50894e-05	0.287103	0.216368	0.182044	0.196892	0.171574	0.189122	0.203424	0.152124	0.188839	0.201329	0.150726	0.100081	0.179553	0.223462	0.21988	0.212183	0.200177	0.148013	0.142308	0.182871	0.240433	0.224511	0.178297	0.14843	0.139584
0	1051	1090	1566	1525	0.158344	1044236	1.02618	3.69227	0.00104603	64.1701	201.635	1.25599	767.923	21.5184	0.0480158	0.0145187	0.188529	0.000210794	761.047	21.4169	0.0484319	0.0145371	0.195535	0.000211327	0.242962	0.490575	0.099481	0.103026	0.103594	0.10334	0.10319	0.093415	0.079446	0.062334	0.101152	0.171387	0.238868	0.239952	0.169	0.126621	0.139962	0.151244	0.111571	0.095259	0.109363	0.145592	0.116978	0.071596	0.06074
1	636	633	1170	1207	0.190914	354150	1.05969	3.75619	0.0019084	59.6887	156.23	1.93476	1131.81	26.2236	0.0395833	0.0121207	0.141525	0.000146913	1105.16	25.8916	0.0401393	0.0121587	0.161	0.000147834	0.465148	0.253557	0.150008	0.157544	0.150398	0.185996	0.230422	0.178416	0.144337	0.117125	0.132993	0.136076	0.158844	0.176265	0.177963	0.162319	0.134396	0.12854	0.148239	0.15753	0.136497	0.101977	0.058876	0.055169	0.09098
2	1126	1106	1423	1429	0.0986652	730284	5.51863	3.72858	0.000495786	75.6042	121.991	1.2157	679.636	20.4668	0.0492618	0.0153524	0.128627	0.000235696	670.394	20.316	0.0497174	0.0153783	0.140145	0.000236491	0.434986	0.540838	0.123949	0.132385	0.149441	0.176698	0.213697	0.182191	0.133725	0.105069	0.122831	0.180441	0.257378	0.290545	0.19977	0.187452	0.192117	0.207792	0.15247	0.143297	0.182537	0.233424	0.142568	0.08627	0.097883
3	442	470	1558	995	0.148433	622657	1.5502	3.40476	-0.00216763	72.295	191.464	1.08247	411.876	15.8634	0.0635975	0.0197661	0.154214	0.0003907	408.506	15.7933	0.0637941	0.019782	0.161073	0.000391329	0.402787	0.127207	0.103475	0.110661	0.091783	0.105329	0.169901	0.163613	0.138613	0.100316	0.096932	0.149966	0.22978	0.257458	0.197351	0.213539	0.206361	0.172859	0.155921	0.216463	0.271201	0.238755	0.115256	0.055812	0.072809
4	1256	1218	1999	1765	0.0937998	1.91238e+06	3.4235	3.73608	0.000592768	81.4971	224.022	0.898459	319.377	13.968	0.0716861	0.0223326	0.155389	0.000498745	315.91	13.897	0.0719551	0.0223608	0.164265	0.000500005	0.12184	0.16355	0.22674	0.230862	0.198668	0.257167	0.317097	0.223427	0.159661	0.191241	0.21852	0.197306	0.187038	0.174921	0.154438	0.18243	0.203534	0.171034	0.10358	0.152592	0.240172	0.279627	0.199045	0.158298	0.182733
5	619	605	955	992	0.208722	253048	1	3.77053	0.0011274	61.6165	221.101	1.53071	1498.3	30.2145	0.0337676	0.0104873	0.146892	0.000109984	1482.82	30.0622	0.0344197	0.0105024	0.15496	0.000110301	0.525712	0.817644	0.123641	0.142992	0.154064	0.174921	0.172259	0.128237	0.08523	0.062717	0.073633	0.094276	0.124434	0.177881	0.138722	0.153544	0.128174	0.143577	0.109057	0.143469	0.14794	0.136184	0.059358	0	0.055856
6	1190	1355	2194	2539	0.529492	3250160	1.17437	3.56199	-0.00136861	59.577	246.879	0.956082	131.214	8.36623	0.127432	0.0382738	0.521214	0.00146489	129.32	8.31878	0.128071	0.038331	0.528049	0.00146927	0.446248	0.0274294	0.093223	0.102087	0.113445	0.132008	0.135503	0.07949	0.035805	0.063501	0.111282	0.163047	0.179052	0.18147	0.153372	0.145446	0.111506	0.063891	0.046576	0.073966	0.090167	0.086332	0.06356	0.05875	0.072859
7	1781	1830	2445	2744	0.381136	4.18311e+06	1.11091	3.58141	0.000366166	98.5188	187.227	0.729168	111.486	8.15896	0.120041	0.0379414	0.238778	0.00143955	110.453	8.12443	0.120475	0.0379767	0.245849	0.00144223	0.663393	0.916014	0.066056	0.090333	0.113495	0.156608	0.154606	0.106474	0.033771	0.04754	0.092965	0.122328	0.109787	0.112678	0.120873	0.127477	0.098446	0.062964	0.060427	0.106396	0.136863	0.129135	0.070399	0.05812	0.098666
8	1922	2148	3021	2555	0.337819	4691419	2.65519	3.62892	0.0015868	63.4903	670.479	0.816672	123.829	8.4016	0.124313	0.0360099	0.371509	0.00129671	122.006	8.35182	0.124821	0.0360719	0.380758	0.00130118	0.549413	0.338188	0.098961	0.116376	0.115085	0.116999	0.111244	0.077984	0.066213	0.077417	0.110596	0.121394	0.128084	0.134458	0.105326	0.104702	0.100712	0.110596	0.110023	0.135044	0.139721	0.101889	0.042274	0.028477	0.0482
126	266	247	553	553	0.591081	46315	1.87828	3.56757	-0.00389105	87.3491	604.074	0.712879	1514.1	30.1258	0.0357313	0.00899766	0.356556	8.09579e-05	1513.8	30.1533	0.0355459	0.00899358	0.356114	8.08845e-05	0.880607	0.406818	0.088626	0.09971	0.11643	0.15211	0.130704	0.094477	0.082699	0.110107	0.129749	0.152828	0.167363	0.186538	0.160367	0.145367	0.119866	0.163966	0.137311	0.168843	0.164041	0.180585	0.066809	0.072743	0.103799
416	329	330	524	529	0.632105	36641.5	2.25041	3.56332	-0.0396476	88.2868	677.901	0.689437	1729.09	32.2613	0.0321843	0.00840324	0.391244	7.06145e-05	1729.89	32.2323	0.0329918	0.00841507	0.390604	7.08135e-05	0.209334	0.17566	0.097581	0.100934	0.090205	0.073449	0.067239	0.063991	0.065567	0.07248	0.080681	0.074269	0.079557	0.101428	0.120083	0.118589	0.125471	0.12503	0.117598	0.097306	0.100384	0.098123	0.103683	0.068201	0.0477
386	367	364	520	529	0.675869	37376.5	1.15041	3.78392	-0.0101523	80.3764	586.898	0.74892	1702.54	31.997	0.0335907	0.00848843	0.423308	7.20535e-05	1706.45	32.013	0.0327421	0.00849549	0.42147	7.21733e-05	0.440462	0.936666	0.10855	0.107897	0.086436	0.086154	0.086753	0.087004	0.106215	0.118393	0.090617	0.057252	0.084775	0.115388	0.12633	0.111421	0.113303	0.090005	0.100459	0.116868	0.118046	0.081781	0.067472	0.06972	0.076388
155	379	379	546	525	0.600221	40193	1.30969	3.37131	0	93.4628	666.585	0.782475	1814.67	33.0413	0.0318807	0.00831894	0.388284	6.92048e-05	1784.69	32.7825	0.0321293	0.00835078	0.39842	6.97356e-05	0.952603	0.866853	0.164956	0.239309	0.291709	0.36846	0.337503	0.238535	0.25737	0.329455	0.335082	0.278341	0.303067	0.300779	0.304594	0.341075	0.315582	0.301389	0.250132	0.31467	0.309437	0.369952	0.276752	0.302549	0.329698
144	331	330	457	456	0.571632	22719.5	1.36075	3.17877	0.0169492	123.818	279.895	0.0595964	1917.32	34.5035	0.0289692	0.00885936	0.222986	7.84882e-05	1848.81	33.9368	0.0294198	0.00888949	0.250618	7.90231e-05	0.944778	0.115151	0.366414	0.384882	0.402693	0.433412	0.416614	0.36822	0.35996	0.432708	0.4536	0.457119	0.4874	0.511107	0.490899	0.455857	0.425976	0.42714	0.42034	0.464484	0.455797	0.449254	0.337757	0.39478	0.505046
401	445	444	724	728	0.561487	125064	1.04534	3.41748	0.00243902	69.7007	597.192	0.844931	522.304	17.2889	0.0634289	0.0161735	0.478047	0.000261583	522.153	17.3185	0.0630088	0.0161683	0.478337	0.000261415	0.476027	0.0245106	0.14567	0.141729	0.124056	0.11144	0.125257	0.117053	0.116528	0.114388	0.105787	0.085354	0.076311	0.082373	0.112807	0.142325	0.175285	0.149857	0.127962	0.117882	0.130044	0.099405	0.083186	0.070229	0.072731
385	320	310	462	476	0.657328	20902	1.15359	3.60112	0.0340909	100.596	520.403	0.530763	1045.42	25.2898	0.0405046	0.0106953	0.365978	0.00011439	1113.15	25.9481	0.0402832	0.0106633	0.324612	0.000113705	0.770169	0.218931	0.084962	0.096786	0.105273	0.119895	0.114114	0.10173	0.095374	0.125914	0.11729	0.07579	0.081938	0.122142	0.134043	0.10917	0.107327	0.111073	0.098999	0.12261	0.121884	0.11878	0.064445	0.053037	0.062774
430	363	366	502	501	0.615093	29503.5	2.80101	3.63529	-0.0119048	90.4023	514.633	0.666294	1772.38	32.7879	0.0318738	0.00832185	0.370282	6.92531e-05	1827.8	33.2646	0.0318793	0.00828673	0.349861	6.86699e-05	0.103521	0.267234	0.14916	0.170378	0.166946	0.173599	0.159143	0.156612	0.148036	0.162846	0.161218	0.152338	0.130495	0.120515	0.133211	0.152932	0.187604	0.188064	0.187637	0.185052	0.189288	0.165799	0.165188	0.141795	0.120714
419	351	349	511	516	0.605159	35392.5	1.17504	3.60526	0	94.9081	732.254	0.565996	1077.41	25.4819	0.0414698	0.0105979	0.414908	0.000112315	1083.89	25.5538	0.0410547	0.0105899	0.411161	0.000112146	0.668073	0.231778	0.089169	0.118794	0.113671	0.099051	0.103697	0.10506	0.110826	0.126719	0.115018	0.103808	0.09589	0.097936	0.093137	0.090578	0.088841	0.084692	0.091403	0.102849	0.112451	0.100778	0.068851	0.049128	0.053795
162	433	430	649	643	0.55658	88700	1.14137	3.72	-0.00928793	82.8047	779.919	0.689831	565.911	18.344	0.0569917	0.0152993	0.363894	0.000234067	563.328	18.3372	0.0570891	0.0153082	0.366699	0.000234342	0.163338	0.82456	0.143255	0.148429	0.212143	0.243446	0.183019	0.120249	0.141634	0.206517	0.227764	0.237427	0.229707	0.236489	0.253824	0.267466	0.264034	0.218577	0.182318	0.259717	0.315218	0.352388	0.19179	0.225894	0.305599
145	329	319	751	750	0.375204	139756	1.13614	4.14214	0	73.8463	556.128	0.822824	1046.18	24.5236	0.045045	0.0116146	0.438931	0.0001349	1025.72	24.3992	0.0446421	0.0116075	0.450279	0.000134734	0.621328	0.100919	0.0923	0.121555	0.117493	0.118578	0.120982	0.092913	0.107331	0.115635	0.123972	0.107218	0.143851	0.144682	0.132673	0.131135	0.138358	0.131604	0.12022	0.142492	0.136053	0.11007	0.067347	0.080949	0.103407
104	324	326	497	498	0.607859	28649	1.81906	3.60638	-0.016129	97.0307	575.048	0.54501	1508.03	30.3411	0.0336029	0.00921549	0.318055	8.49253e-05	1534.97	30.5256	0.0352972	0.00919708	0.305155	8.45863e-05	0.959939	0.937805	0.241264	0.259353	0.246888	0.176728	0.132702	0.166152	0.204604	0.247289	0.214182	0.226513	0.222782	0.240035	0.197775	0.231857	0.268878	0.280309	0.258071	0.288925	0.281688	0.302604	0.225707	0.278976	0.345489
458	733	749	1193	1226	0.575973	649848	1.85161	3.64465	0.00114155	56.3236	488.767	0.934218	94.471	7.22253	0.146441	0.0421648	0.375222	0.00177787	94.0206	7.21531	0.146757	0.0421869	0.378064	0.00177974	0.205838	0.571147	0.094407	0.084168	0.104309	0.143438	0.15227	0.138498	0.14834	0.186216	0.186331	0.152881	0.152661	0.146314	0.116483	0.069526	0.071478	0.077837	0.079326	0.077246	0.07005	0.077471	0.083046	0.087776	0.08709
455	987	985	1454	1436	0.555146	989810	1.02556	3.67535	0	49.1294	490.518	0.944282	184.54	10.0305	0.112187	0.0303171	0.447905	0.000919129	183.023	9.99066	0.112621	0.0303602	0.452478	0.000921741	0.544813	0.16243	0.127467	0.130259	0.148487	0.190704	0.186115	0.155824	0.159067	0.17069	0.164341	0.128963	0.13949	0.132451	0.149964	0.141602	0.193094	0.20132	0.162557	0.17158	0.194582	0.16643	0.080625	0.058912	0.058812
461	754	743	1324	1341	0.555332	791628	14.2254	3.55556	0.00202429	54.0317	346.671	0.988076	90.4047	6.29305	0.174177	0.0532001	0.697686	0.00283025	110.892	6.46227	0.174914	0.0532438	0.629268	0.0028349	0.22358	0.570231	0.157302	0.186129	0.232293	0.244464	0.23057	0.210023	0.212146	0.236363	0.23977	0.193187	0.190113	0.185741	0.212532	0.210399	0.238196	0.205447	0.162175	0.193373	0.21999	0.237331	0.183473	0.135586	0.088278
323	1060	1050	1471	1543	0.485289	1098700	1.39242	3.63158	0	53.1444	560.529	1.06042	185.851	10.2062	0.107596	0.029688	0.353612	0.00088138	186.775	10.2337	0.107219	0.0296639	0.350279	0.000879949	0.209592	0.147145	0.090018	0.118396	0.148308	0.172011	0.169744	0.147403	0.119547	0.118046	0.125919	0.137744	0.153668	0.152072	0.142336	0.137203	0.169743	0.132499	0.139448	0.213163	0.272552	0.188354	0.054562	0.066374	0.116527
439	787	786	1192	1192	0.525648	603454	1.23629	3.64706	0.00764192	59.2976	643.004	0.914491	668.795	19.5957	0.05705	0.0152206	0.3167	0.000231667	668.775	19.5833	0.0571602	0.015227	0.316698	0.000231861	0.754518	0.125261	0.185436	0.224008	0.227505	0.203263	0.186632	0.173427	0.211561	0.234895	0.217884	0.163566	0.169979	0.141826	0.156579	0.149439	0.173393	0.119328	0.10548	0.147845	0.185587	0.14413	0.090937	0.081623	0.097887
446	559	792	1334	1470	0.357566	901026	1.17621	3.60088	0	52.4173	401.934	0.971734	224.408	11.1231	0.0986916	0.0281736	0.39268	0.000793753	225.635	11.1133	0.0998135	0.0282265	0.389036	0.000796733	0.113509	0.930348	0.202139	0.200723	0.240981	0.291236	0.277688	0.222772	0.240442	0.289882	0.292967	0.239569	0.230296	0.242041	0.261584	0.244241	0.229482	0.204536	0.219027	0.285139	0.335446	0.279131	0.201038	0.144274	0.170567
432	1017	1012	1400	1427	0.449422	916703	1	3.57309	-0.00499168	53.6902	532.977	0.998057	160.269	9.24861	0.117985	0.0329045	0.714236	0.00108271	165.871	9.36246	0.117812	0.0329205	0.704139	0.00108376	0.501324	0.944732	0.254374	0.249376	0.285205	0.285312	0.284576	0.265262	0.285972	0.308826	0.277949	0.235945	0.22431	0.242505	0.250016	0.23718	0.23748	0.239976	0.247185	0.263089	0.292231	0.295238	0.241365	0.187582	0.172736
447	686	674	1145	1170	0.585855	531308	1.20567	3.70412	0.00125156	55.3116	395.261	0.961236	478.246	16.2008	0.0704371	0.0192841	0.387121	0.000371878	473.448	16.1202	0.0707356	0.0193153	0.393518	0.00037308	0.775365	0.161829	0.146175	0.20761	0.212009	0.188679	0.171762	0.192616	0.22098	0.238183	0.208216	0.155006	0.144989	0.151069	0.172873	0.181199	0.233791	0.214738	0.170688	0.142348	0.17831	0.18985	0.159155	0.123143	0.121801
314	1144	1141	1608	1593	0.401727	1.2741e+06	1.03131	3.73135	-0.000725163	51.6675	557.836	0.923586	247.04	11.8479	0.0926881	0.0254374	0.327974	0.000647062	244.759	11.7888	0.0931309	0.0254784	0.334122	0.000649149	0.278687	0.218261	0.041451	0.09758	0.156391	0.166046	0.119444	0.132805	0.144557	0.173796	0.130054	0.129395	0.136286	0.15963	0.136643	0.100264	0.091938	0.053784	0.071909	0.116783	0.162515	0.122922	0.064861	0.044752	0.058489
445	632	621	1021	999	0.527865	376652	1.08097	3.63462	0.00445104	63.8686	559.621	0.885548	705.531	20.2637	0.0544624	0.0147212	0.28549	0.000216714	705.479	20.2497	0.0545178	0.0147289	0.285371	0.00021694	0.754392	0.439606	0.195989	0.221502	0.200552	0.18186	0.199783	0.174876	0.17235	0.189102	0.188511	0.153771	0.165929	0.16166	0.193748	0.249615	0.328823	0.237333	0.179122	0.203468	0.243259	0.195649	0.156761	0.157907	0.108832
324	702	630	1561	1705	0.481243	904698	1.11872	3.49483	-0.00690846	53.4633	487.155	1.18138	226.592	11.1331	0.1	0.0279198	0.409866	0.000779513	231.41	11.2459	0.0991387	0.0278209	0.397426	0.000774002	0.251777	0.159546	0.068269	0.10447	0.146553	0.162521	0.156491	0.135876	0.135338	0.148017	0.144942	0.145696	0.152934	0.135118	0.108885	0.151827	0.196584	0.134184	0.086036	0.124009	0.204732	0.129025	0.069831	0.059738	0.101938
319	1139	1145	1650	1618	0.380926	1293406	1.02612	3.61306	0.00206469	50.6644	562.652	0.925054	195.714	10.5326	0.103594	0.0286899	0.328921	0.00082311	192.644	10.4615	0.104084	0.0287503	0.339706	0.00082658	0.338582	0.895423	0.066597	0.122032	0.161704	0.171636	0.140533	0.147282	0.139619	0.173011	0.14898	0.140401	0.153703	0.132017	0.102468	0.140066	0.198521	0.105545	0.05808	0.13747	0.230929	0.13948	0.0623	0.034168	0.078887
826	249	258	392	432	0.397315	10104.5	1	3.54167	-0.00704225	168.461	51.7514	0	1616.11	31.5811	0.032689	0.0105072	0.131254	0.0001104	1639.61	31.7841	0.032474	0.0105302	0.118275	0.000110885	0.92033	0.0909683	0.224732	0.264644	0.256692	0.270726	0.184758	0.141422	0.23111	0.355843	0.275142	0.23005	0.258834	0.238297	0.206104	0.250544	0.404175	0.340277	0.22369	0.253291	0.400181	0.361923	0.292334	0.28036	0.303204
828	253	255	355	356	0.320693	3373.5	1.17021	3.49398	-0.0617284	184.201	40.8013	0	1492.08	30.4486	0.0329637	0.0117217	0.141352	0.000137398	1497.54	30.4512	0.0327988	0.0117861	0.135457	0.000138911	0.841164	0.525642	0.254679	0.287128	0.243607	0.283705	0.252707	0.229003	0.243864	0.316411	0.275141	0.282509	0.325653	0.326961	0.273065	0.258002	0.301926	0.310813	0.245435	0.226854	0.293639	0.330817	0.283082	0.276547	0.334858
817	192	345	370	369	0.237151	7387.5	1.56611	3.44538	0.042735	185.127	45.324	0	2502.09	39.4773	0.0256659	0.00938586	0.0744516	8.80943e-05	2447.18	38.9762	0.0253932	0.0093975	0.094589	8.83131e-05	0.265096	0.712214	0.22814	0.229989	0.229097	0.243728	0.190452	0.179621	0.225861	0.28288	0.229332	0.224675	0.248003	0.240664	0.221302	0.261294	0.301526	0.281533	0.180668	0.230811	0.322065	0.364941	0.273563	0.266271	0.285559
829	255	255	375	370	0.241007	7385	3.26829	3.67832	0.0212766	183.553	42.2021	0	1570.24	30.9654	0.0330217	0.0111425	0.189281	0.000124155	1538.38	30.6914	0.0326967	0.0111252	0.204809	0.00012377	0.158679	0.244173	0.252904	0.25731	0.257745	0.300476	0.287603	0.268186	0.308517	0.330662	0.274355	0.272326	0.34352	0.335488	0.330628	0.305252	0.39424	0.354311	0.272567	0.252074	0.357925	0.355271	0.288532	0.299699	0.369404
822	255	232	386	441	0.388234	9899	1.34669	3.28188	0	170.633	40.9824	0	1966.44	34.7534	0.0300781	0.00985128	0.149224	9.70477e-05	2042.34	35.5379	0.0291013	0.00982388	0.115186	9.65087e-05	0.513679	0.0145009	0.273725	0.268218	0.268531	0.293825	0.192089	0.148108	0.273223	0.33302	0.246329	0.22387	0.299749	0.272365	0.196549	0.256862	0.394522	0.332136	0.182732	0.236437	0.394504	0.374833	0.29147	0.303131	0.322647
825	236	241	388	389	0.405602	6895.5	1.22715	3.70297	0.010101	168.217	44.4776	0	2814.68	41.9749	0.0230553	0.00913091	0.0634528	8.33735e-05	2779.64	41.8327	0.0246091	0.00911856	0.0708076	8.31481e-05	0.330582	0.415485	0.241055	0.263609	0.276337	0.321503	0.285607	0.226502	0.256086	0.327057	0.295876	0.287126	0.335278	0.304963	0.227031	0.253658	0.34994	0.337104	0.221038	0.209014	0.331788	0.38654	0.343898	0.258845	0.306424
819	337	360	368	387	0.654509	4307.5	3.1407	3.53425	0.0140845	156.26	186.726	0	1650.62	31.6792	0.031354	0.0101909	0.478177	0.000103854	1686.21	31.9671	0.0328346	0.010217	0.467425	0.000104387	0.987936	0.427176	0.165858	0.229041	0.216837	0.246806	0.190599	0.192946	0.261897	0.308741	0.239717	0.218871	0.292609	0.267995	0.201485	0.165807	0.253199	0.288944	0.211582	0.197445	0.276386	0.339924	0.299056	0.296787	0.317102
818	251	249	383	381	0.49353	5736	1.16637	3.57333	0.0958904	173.175	64.1661	0	1084.56	25.7927	0.0391581	0.012693	0.204037	0.000161111	1106.97	25.9555	0.03939	0.0126738	0.187744	0.000160626	0.127388	0.927755	0.339994	0.324513	0.285096	0.292295	0.234196	0.203378	0.269713	0.330745	0.280281	0.296024	0.337642	0.32913	0.26524	0.303113	0.403727	0.381088	0.236034	0.246919	0.395353	0.432993	0.357423	0.282359	0.299119
830	245	244	401	395	0.343866	8789	1	3.68571	-0.00724638	174.698	45.7244	0	2588.79	40.1418	0.0243474	0.00880781	0.0805947	7.75775e-05	2509.64	39.4529	0.0255044	0.00884369	0.107431	7.82109e-05	0.419923	0.832505	0.310833	0.349429	0.301087	0.281143	0.223533	0.229159	0.288615	0.361795	0.332329	0.323899	0.344282	0.358682	0.328996	0.344943	0.389504	0.340017	0.214138	0.258594	0.424021	0.470145	0.402311	0.337819	0.378903
821	244	245	383	381	0.522579	5476.5	1	3.49231	0.015873	164.86	96.7743	0	1961.31	34.7253	0.0297036	0.00977548	0.182656	9.55601e-05	1887.66	34.1295	0.030394	0.00982619	0.212739	9.65539e-05	0.899392	0.544298	0.220673	0.206732	0.216214	0.274095	0.245588	0.232672	0.280514	0.330129	0.284979	0.285283	0.2603	0.241504	0.22878	0.30196	0.306559	0.303527	0.199512	0.250631	0.345042	0.386934	0.3254	0.311788	0.321343
824	237	242	388	393	0.470143	6198.5	1.18524	3.41584	-0.010101	157.811	106.757	0	1643.25	31.8221	0.0322522	0.0104919	0.225289	0.00011008	1566.56	31.1776	0.0316338	0.0105336	0.25886	0.000110958	0.0525803	0.80929	0.240037	0.209993	0.233572	0.295929	0.220426	0.163075	0.22313	0.331438	0.244558	0.243655	0.266429	0.280754	0.231791	0.231896	0.293618	0.273684	0.225304	0.233894	0.346058	0.384436	0.323388	0.280773	0.285475
827	235	234	382	386	0.475722	6941.5	1.05841	3.76991	0.018018	172.215	51.9065	0	2229.89	37.38	0.0283487	0.00988161	0.0753768	9.76463e-05	2179.32	36.8888	0.0278442	0.00986526	0.095086	9.73234e-05	0.947582	0.351595	0.248365	0.280299	0.251729	0.306324	0.241836	0.17856	0.178906	0.258017	0.260296	0.287948	0.30532	0.293972	0.243821	0.247242	0.293348	0.280356	0.228087	0.215363	0.313926	0.325913	0.265879	0.229436	0.284698
9	626	618	887	914	0.431627	279908	1.17448	3.61215	0.0125	103.186	601.686	0.552023	336.873	14.0302	0.0742002	0.0214022	0.349974	0.000458054	335.064	13.9785	0.0744623	0.0214289	0.352578	0.000459196	0.246243	0.295477	0.098736	0.105164	0.11614	0.119779	0.108474	0.076551	0.061002	0.075384	0.087615	0.106176	0.126588	0.143893	0.116091	0.120085	0.138613	0.129527	0.105886	0.124542	0.135694	0.113693	0.064598	0.070652	0.108009
26	709	704	1016	990	0.460095	392650	1.05727	3.66835	-0.00126422	100.832	624.832	0.592909	343.104	14.2238	0.0732116	0.021083	0.320427	0.000444492	339.159	14.1438	0.0736013	0.021118	0.328229	0.000445969	0.990239	0.0280436	0.107284	0.11157	0.123202	0.149813	0.156055	0.110335	0.098157	0.120951	0.133483	0.105043	0.079756	0.078604	0.06696	0.085479	0.114852	0.131547	0.124463	0.102964	0.106133	0.110291	0.092301	0.063238	0.097268
24	754	779	1148	1047	0.397912	511176	1.48854	3.7105	-0.0010627	105.794	509.166	0.52186	199.487	10.8367	0.0948551	0.0284106	0.232219	0.000807163	192.411	10.6698	0.0951168	0.028525	0.25942	0.000813677	0.55053	0.0125014	0.103449	0.121935	0.152328	0.164449	0.172319	0.162928	0.145872	0.141289	0.127308	0.118688	0.120711	0.141507	0.134042	0.116352	0.102646	0.125256	0.141949	0.143312	0.128832	0.123851	0.110219	0.105459	0.098983
10	684	674	940	921	0.386094	312156	1.02557	3.60627	-0.00956284	107.397	627.697	0.406876	377.298	14.9913	0.06875	0.020443	0.237657	0.000417915	369.283	14.8529	0.0693409	0.0204928	0.253689	0.000419955	0.20535	0.204933	0.098111	0.097328	0.099806	0.092924	0.085742	0.080423	0.093865	0.101878	0.100421	0.115065	0.149972	0.174332	0.120896	0.113167	0.110766	0.147021	0.121722	0.124953	0.11631	0.126097	0.082031	0.053614	0.049473
17	543	540	909	920	0.423849	276438	1.43874	3.67236	-0.0046729	112.022	414.171	0.298476	1401.27	28.8177	0.0367746	0.0106864	0.247628	0.0001142	1410.39	28.9082	0.037111	0.010683	0.242495	0.000114127	0.391096	0.895607	0.110494	0.116776	0.138778	0.14318	0.148803	0.137494	0.098608	0.079644	0.07714	0.118512	0.139326	0.16768	0.130121	0.12489	0.127699	0.127706	0.10582	0.101862	0.137173	0.13605	0.08574	0.048007	0.094058
14	1004	871	1263	1590	0.388417	951012	2.15711	3.64706	0.000785546	85.7205	543.668	0.750085	143.333	8.89357	0.11724	0.0347336	0.480951	0.00120642	152.531	8.98827	0.117094	0.0347042	0.447313	0.00120438	0.100214	0.695974	0.103877	0.134348	0.131817	0.125597	0.098979	0.087682	0.088438	0.090388	0.069858	0.064631	0.068369	0.083425	0.094385	0.112648	0.138895	0.148035	0.113615	0.108349	0.132202	0.132616	0.090664	0.06971	0.099565
20	421	637	1087	1142	0.254738	488949	1.16448	3.60449	0.0020429	109.866	429.592	0.316794	808.691	22.0367	0.0472712	0.0142627	0.193349	0.000203426	810.699	22.019	0.047554	0.0142626	0.191002	0.000203422	0.55586	0.966285	0.156642	0.160384	0.154634	0.147457	0.15449	0.14635	0.131709	0.127834	0.144754	0.156874	0.171741	0.196406	0.189617	0.1791	0.165552	0.175366	0.142162	0.140818	0.158014	0.190418	0.138932	0.113565	0.132906
12	396	574	1047	1093	0.402198	417146	1.18195	3.93663	0	91.0023	539.822	0.63025	176.494	9.99166	0.104934	0.0309621	0.366063	0.000958652	177.685	10.0274	0.104428	0.0309227	0.361771	0.000956212	0.486112	0.72627	0.27821	0.287943	0.28953	0.321941	0.245104	0.181061	0.180907	0.243163	0.270747	0.256651	0.231712	0.236311	0.231967	0.247792	0.26824	0.290111	0.281733	0.300165	0.316032	0.323127	0.29125	0.285723	0.338608
225	988	996	1426	1383	0.330415	928914	1.04297	3.66595	0.00214439	70.3979	779.459	0.797674	117.221	8.26149	0.123842	0.0367928	0.257117	0.00135371	115.487	8.20991	0.124366	0.0368548	0.267934	0.00135828	0.383194	0.616491	0.07957	0.091949	0.095642	0.112468	0.118621	0.101563	0.101569	0.115935	0.112809	0.094956	0.110817	0.126965	0.134689	0.129464	0.137944	0.105207	0.073758	0.088689	0.118073	0.108126	0.101062	0.109395	0.087373
25	799	791	1116	1091	0.409926	495982	1.05068	3.71617	0	98.666	553.951	0.533439	445.29	16.2735	0.0640223	0.0186842	0.250353	0.000349099	439.008	16.1535	0.0645963	0.0187267	0.260365	0.000350689	0.268021	0.350164	0.059468	0.076433	0.089654	0.094138	0.094657	0.088179	0.087092	0.086878	0.094451	0.097363	0.104989	0.114156	0.089636	0.098341	0.109885	0.127682	0.120679	0.145911	0.150986	0.152736	0.107095	0.082683	0.091135
22	804	712	1424	1174	0.407064	556685	1.28827	3.56554	0.00105932	100.628	489.595	0.611644	380.874	14.9512	0.0701367	0.0207892	0.259178	0.000432192	377.477	14.8741	0.070469	0.0208288	0.265407	0.000433839	0.847647	0.49423	0.083498	0.07598	0.066231	0.064255	0.086564	0.075341	0.073397	0.091327	0.082486	0.052893	0.056414	0.11253	0.11676	0.122182	0.112223	0.130173	0.109277	0.100899	0.086997	0.08879	0.083913	0.063789	0.066973
11	669	679	1043	1086	0.470392	444224	1.07005	3.64646	-0.00379747	97.4022	448.711	0.559454	1208.36	26.6039	0.0409	0.0115278	0.265894	0.00013289	1202.12	26.5374	0.0409153	0.0115386	0.269641	0.000133139	0.684826	0.172864	0.079571	0.083239	0.071044	0.066098	0.073372	0.044062	0.056182	0.075579	0.084912	0.069869	0.088048	0.12789	0.106256	0.06583	0.046485	0.081458	0.102878	0.117618	0.118439	0.106936	0.064745	0.044293	0.03685
592	379	383	595	602	0.692959	72789.5	1.91405	3.70438	0.00367647	112.979	317.689	0.236298	239.573	11.8239	0.0860072	0.0241997	0.637821	0.000585627	233.579	11.7157	0.0868782	0.024252	0.648349	0.00058816	0.91816	0.594581	0.190749	0.179777	0.190896	0.176303	0.178966	0.138794	0.165715	0.141061	0.111615	0.126566	0.208017	0.231122	0.233877	0.233837	0.262864	0.206584	0.194609	0.207328	0.259063	0.266635	0.220403	0.214879	0.175739
619	404	398	563	593	0.675833	63507	3.29401	3.61957	0.0255474	121.814	615.708	0.212906	962.964	24.0928	0.0427502	0.012117	0.553092	0.000146821	960.118	24.0118	0.0428866	0.0121388	0.554432	0.000147351	0.596404	0.597546	0.245246	0.274005	0.277749	0.283713	0.267871	0.2252	0.246653	0.243289	0.175861	0.163538	0.250338	0.286078	0.284397	0.311836	0.305607	0.266729	0.239363	0.262958	0.280337	0.29048	0.259594	0.299108	0.256276
621	418	418	611	592	0.733089	72019	1.26039	3.70111	0.00371747	121.437	251.607	0.112082	489.719	17.0268	0.0605089	0.0179	0.547181	0.000320409	479.87	16.8773	0.0607731	0.0179433	0.556604	0.000321962	0.649501	0.0926619	0.203092	0.22995	0.246955	0.243816	0.226802	0.200227	0.228281	0.181075	0.169128	0.161487	0.248916	0.287689	0.319321	0.270751	0.254154	0.226256	0.222132	0.218226	0.235514	0.239439	0.233221	0.263279	0.266873
663	378	386	563	590	0.665679	61875.5	9.40534	3.51799	-0.0289855	109.302	428.005	0.350543	897.922	23.0459	0.045288	0.012839	0.668498	0.00016484	899.442	23.0451	0.0452846	0.0128383	0.668141	0.000164823	0.896426	0.77003	0.125196	0.151796	0.177018	0.173955	0.158576	0.128674	0.123685	0.107476	0.091281	0.165429	0.220192	0.22509	0.210554	0.264323	0.267869	0.23111	0.19316	0.200595	0.209624	0.203949	0.189361	0.20903	0.175001
578	394	385	647	628	0.697307	92196.5	1.08477	3.40532	0.00334448	92.5241	978.081	0.427012	437.577	15.6064	0.0698722	0.0172468	0.752208	0.000297454	435.715	15.5735	0.0704368	0.0172683	0.753542	0.000298195	0.485149	0.975834	0.19025	0.20976	0.240619	0.242305	0.247921	0.214139	0.236947	0.221097	0.19232	0.202653	0.232625	0.259639	0.268953	0.297167	0.27189	0.214817	0.196186	0.230468	0.296119	0.30864	0.28508	0.282061	0.220196
614	347	391	545	569	0.509924	53042.5	3.56255	3.89928	-0.00362319	138.127	291.356	0.0167036	1290.61	28.0504	0.0365254	0.0108242	0.437651	0.000117163	1257.16	27.67	0.0367846	0.0108468	0.453114	0.000117653	0.812326	0.783748	0.194832	0.238744	0.240976	0.219896	0.231758	0.188355	0.23293	0.193838	0.11832	0.09452	0.20481	0.246449	0.246754	0.249771	0.269007	0.213179	0.188459	0.20971	0.273921	0.299544	0.226445	0.183096	0.139444
636	347	356	598	581	0.712175	64493.5	1.28958	3.27798	0.00363636	114.606	398.591	0.188655	834.01	22.0799	0.0483011	0.0130846	0.696326	0.000171207	812.841	21.8482	0.0476882	0.0131175	0.704274	0.00017207	0.233294	0.173324	0.151733	0.198211	0.240606	0.244627	0.233703	0.162422	0.165238	0.147466	0.147679	0.155745	0.210668	0.258602	0.276069	0.268042	0.251432	0.1786	0.159376	0.213847	0.3275	0.316009	0.234875	0.184173	0.157653
674	488	412	815	564	0.45135	93291.5	1.54446	3.63702	0.0169082	79.344	605.862	0.7808	617.06	19.1063	0.0545181	0.0132951	0.700456	0.000176759	625.56	19.246	0.0547307	0.0132678	0.696688	0.000176036	0.673928	0.67648	0.10235	0.144423	0.166274	0.139748	0.127479	0.123735	0.148785	0.135588	0.096866	0.104548	0.141153	0.160239	0.163587	0.173576	0.174651	0.162701	0.183989	0.198882	0.228659	0.215285	0.194663	0.184275	0.154513
605	393	370	637	606	0.683715	89092	2.80334	3.30519	0.00326797	138.018	435.905	0.0564248	130.241	8.73645	0.112615	0.034221	0.509014	0.00117107	132.437	8.69723	0.113448	0.0342731	0.50506	0.00117465	0.58754	0.902114	0.159597	0.172007	0.203411	0.185466	0.191123	0.139611	0.177625	0.134492	0.125868	0.130149	0.200268	0.222709	0.255694	0.254532	0.210951	0.174838	0.198451	0.212637	0.222264	0.232764	0.220821	0.209142	0.171319
629	425	438	610	666	0.699658	92218	1.12534	3.36254	0	110.592	258.285	0.226116	691.66	20.222	0.0513383	0.0149383	0.597421	0.000223154	680.484	20.0857	0.0516199	0.0149681	0.604057	0.000224045	0.654753	0.0833692	0.252458	0.280731	0.293519	0.303469	0.278453	0.25339	0.275567	0.267347	0.215494	0.19945	0.266623	0.288323	0.307702	0.34833	0.355326	0.272566	0.229741	0.269085	0.326272	0.340682	0.300462	0.275641	0.24088
627	332	310	661	669	0.678323	105534	1.15358	3.71547	0.00555556	101.539	504.54	0.481966	414.81	15.1992	0.0693776	0.0196945	0.559644	0.000387875	425.096	15.2945	0.0695331	0.019681	0.548871	0.000387343	0.0450396	0.595567	0.186839	0.244827	0.240311	0.232905	0.255752	0.204817	0.208017	0.163852	0.150012	0.142172	0.226547	0.242874	0.248977	0.255633	0.257045	0.226784	0.213588	0.191212	0.188603	0.190485	0.196208	0.201695	0.195464
650	386	390	634	643	0.669594	89978.5	1.94317	3.54952	0.022508	107.914	374.794	0.336336	1127.32	25.8496	0.0407945	0.0110908	0.607438	0.000123006	1109.84	25.6626	0.0408106	0.0111297	0.613622	0.000123871	0.369039	0.395548	0.260275	0.299404	0.311217	0.308447	0.315359	0.287099	0.280589	0.249068	0.239713	0.267378	0.328053	0.334872	0.354627	0.340122	0.34047	0.284528	0.287957	0.268668	0.306512	0.304266	0.285562	0.27519	0.252099
27	580	576	875	867	0.793918	258318	1.02548	3.73663	0.00596421	50.3476	367.77	0.953443	174.645	9.67462	0.115372	0.0306432	0.792908	0.000939007	173.908	9.64476	0.115794	0.0306804	0.793938	0.000941286	0.0300936	0.475249	0.140399	0.162566	0.189966	0.214539	0.226221	0.160201	0.130587	0.139197	0.151582	0.121019	0.122989	0.170043	0.170411	0.149441	0.13095	0.140579	0.158493	0.188098	0.236491	0.208341	0.110647	0.073037	0.135546
28	592	592	864	858	0.797186	250375	1.00904	3.51663	0	50.4352	358.919	0.954209	554.62	17.5035	0.0654	0.0167728	0.780285	0.000281327	548.486	17.4076	0.0657604	0.0167959	0.782833	0.000282101	0.339099	0.23536	0.134377	0.136442	0.113462	0.106988	0.09903	0.082984	0.094394	0.107573	0.121058	0.113372	0.109966	0.100751	0.100286	0.120768	0.11362	0.119278	0.11384	0.132856	0.125463	0.119477	0.089691	0.087987	0.096162
29	546	535	885	910	0.81727	281663	1.0437	3.58094	0.00361011	47.0453	341.469	0.964916	205.605	10.1019	0.115831	0.0314636	0.866436	0.000989958	205.339	10.0909	0.116771	0.0314843	0.86676	0.000991262	0.820969	0.56423	0.096812	0.143493	0.165688	0.174138	0.177579	0.144008	0.103547	0.076268	0.093536	0.158111	0.22347	0.232685	0.201692	0.212033	0.160742	0.106658	0.114488	0.194021	0.171109	0.146783	0.081157	0.087546	0.095276
30	531	534	896	902	0.806582	283626	1.05763	3.42441	-0.00365631	47.8886	336.012	0.962158	372.155	13.6688	0.0875682	0.0234096	0.8698	0.000548008	364.426	13.5684	0.088377	0.0234574	0.872618	0.00055025	0.458821	0.567532	0.176914	0.198741	0.179817	0.213055	0.239972	0.197968	0.193147	0.177851	0.193329	0.237895	0.341035	0.374085	0.229023	0.232469	0.265034	0.306335	0.231546	0.256064	0.287593	0.279741	0.165557	0.107951	0.181432
48	250	237	377	352	0.563988	2915	1.06479	3.47945	0.028169	131.938	329.226	0.0133791	1376.5	28.8452	0.0373776	0.0103389	0.720054	0.000106893	1325.25	28.5086	0.0355166	0.010397	0.730942	0.000108098	0.363897	0.514893	0.213113	0.213372	0.209393	0.215005	0.300346	0.269425	0.170667	0.122926	0.198219	0.270325	0.308018	0.357799	0.31032	0.347422	0.362045	0.32782	0.2914	0.26411	0.315494	0.231499	0.193115	0.254498	0.431369
44	313	311	464	442	0.520846	16577	1.21408	3.69388	-0.00689655	97.4825	609.828	0.608735	726.024	20.3583	0.0521052	0.013771	0.801298	0.00018964	691.151	19.9677	0.0522272	0.0138428	0.811075	0.000191623	0.116125	0.565739	0.228969	0.272007	0.368168	0.421005	0.349768	0.18914	0.176065	0.248834	0.287029	0.226384	0.248041	0.282626	0.309909	0.323219	0.296034	0.252716	0.262654	0.305056	0.344208	0.25438	0.193189	0.183189	0.329497
35	252	251	396	394	0.439767	4833	1.02088	3.75824	-0.011236	134.948	705.043	0.163046	1331.11	28.1703	0.0380231	0.0102387	0.701533	0.000104832	1279.84	27.7687	0.039831	0.0103111	0.71289	0.000106319	0.754523	0.85513	0.243719	0.296363	0.30806	0.300767	0.274823	0.243825	0.28925	0.228314	0.191927	0.203967	0.353414	0.419548	0.326494	0.317137	0.338454	0.384055	0.268401	0.280373	0.309174	0.365375	0.284433	0.316352	0.371305
60	336	476	346	426	0.559916	4315	1.17179	5.27027	-0.0571429	89.387	591.471	0.692932	809.657	21.6086	0.0495919	0.0124522	0.873653	0.000155058	850.452	22.3642	0.0457344	0.0123255	0.867415	0.000151919	0.345904	0.0813263	0.259116	0.296259	0.249583	0.295136	0.317035	0.249724	0.194823	0.237246	0.266312	0.297972	0.33875	0.392565	0.363254	0.306789	0.29602	0.277613	0.248173	0.239081	0.337761	0.340737	0.254105	0.256287	0.39206
66	271	256	399	387	0.759051	6362.5	1.14732	3.69118	0	79.6655	569.386	0.759921	798.272	21.7	0.0502837	0.0114896	0.842522	0.000132011	815.659	22.1082	0.0464334	0.0114433	0.839057	0.000130948	0.508437	0.605107	0.340528	0.380253	0.427529	0.437118	0.369435	0.283474	0.23688	0.270548	0.315759	0.347381	0.321027	0.333498	0.315935	0.335815	0.3147	0.251272	0.241286	0.331858	0.462819	0.421424	0.330289	0.292072	0.381357
56	241	276	346	339	0.702829	5349	1.82161	3.02326	0.0731707	153.16	314.886	0.00972144	1523.99	30.532	0.0347812	0.0112889	0.651747	0.00012744	1466.67	30.0396	0.0347694	0.0113519	0.66367	0.000128866	0.432239	0.656378	0.277412	0.298856	0.319841	0.4119	0.443719	0.302354	0.17254	0.177205	0.263548	0.34473	0.385193	0.363779	0.30981	0.321646	0.32079	0.286118	0.316029	0.379437	0.447042	0.391237	0.294273	0.280526	0.388152
37	267	256	376	411	0.559237	6486	3.83479	3.51852	0.00943396	123.41	519.083	0.137373	1170.27	26.6515	0.0379804	0.010366	0.73541	0.000107453	1196.05	26.8886	0.0390789	0.0103629	0.729966	0.00010739	0.352277	0.4651	0.277218	0.344144	0.33347	0.281724	0.286257	0.284117	0.281309	0.234355	0.182337	0.221573	0.31906	0.343192	0.265944	0.252962	0.301873	0.306559	0.281256	0.252442	0.402233	0.424866	0.251136	0.120001	0.293719
57	274	273	389	389	0.779864	5734	1.11638	3.64286	0	89.2172	737.04	0.66812	536.756	17.4084	0.0612288	0.016	0.822939	0.000255999	504.281	17.0724	0.0594557	0.0160195	0.833369	0.000256625	0.481115	0.251684	0.275865	0.194275	0.263259	0.362477	0.432299	0.285331	0.129301	0.143891	0.1936	0.320695	0.369562	0.388914	0.306338	0.274664	0.197131	0.170901	0.279406	0.353852	0.372884	0.276837	0.217442	0.25209	0.361023
55	267	270	391	419	0.655089	4562	1.68387	3.73684	0.027027	112.412	706.628	0.405085	907.276	23.1226	0.0449619	0.0125717	0.724502	0.000158047	885.973	22.927	0.0462073	0.0125778	0.731358	0.000158202	0.416415	0.203219	0.281358	0.323091	0.32259	0.324126	0.316196	0.269565	0.271192	0.316117	0.330603	0.301606	0.315361	0.388704	0.436936	0.48087	0.452992	0.369305	0.354869	0.413749	0.459035	0.409741	0.318744	0.392539	0.518298
47	272	290	414	460	0.533797	13704	1.4986	3.28346	0	135.18	524.825	0.0318155	972.053	23.9008	0.0443532	0.011785	0.724417	0.000138887	931.83	23.4907	0.0436974	0.0118718	0.735986	0.000140939	0.994005	0.376967	0.18005	0.235761	0.330449	0.375345	0.386082	0.238692	0.200196	0.126404	0.194653	0.271562	0.406752	0.386411	0.343298	0.330914	0.33606	0.392547	0.36568	0.289106	0.294619	0.318351	0.260886	0.202412	0.325219
39	267	265	411	404	0.60843	9200	1.4144	3.70476	0.00970874	144.838	167.337	0	346.127	13.7008	0.0743905	0.0214788	0.560802	0.000461337	355.43	13.7503	0.0768241	0.0215128	0.549617	0.000462802	0.398138	0.625413	0.263574	0.304608	0.26351	0.279704	0.310824	0.206259	0.183707	0.194285	0.22212	0.205326	0.235715	0.289502	0.274645	0.276587	0.237715	0.251776	0.252544	0.307942	0.305	0.28444	0.235337	0.258932	0.332783
46	260	275	435	397	0.701326	4028	1.5197	3.51852	0	112.151	520.013	0.390268	938.96	23.7016	0.0448571	0.0117622	0.707208	0.00013835	909.181	23.3846	0.0438973	0.0118016	0.716479	0.000139278	0.452341	0.0175099	0.273579	0.320269	0.328893	0.344935	0.375698	0.253886	0.203866	0.134664	0.191662	0.244186	0.323608	0.37629	0.323646	0.348608	0.272439	0.234362	0.226433	0.323088	0.373033	0.366767	0.290164	0.214673	0.338681
803	263	262	412	412	0.666366	10194	1.14688	3.8125	0.0638298	132.258	317.644	0.0335491	1965.81	34.772	0.0294529	0.00852748	0.495793	7.27179e-05	1953.61	34.5489	0.0296162	0.008581	0.497391	7.36336e-05	0.193055	0.367004	0.425258	0.358932	0.342143	0.318215	0.225806	0.19095	0.310999	0.40755	0.318092	0.317347	0.295261	0.269806	0.225595	0.284973	0.335821	0.339986	0.294997	0.348903	0.422151	0.371116	0.261835	0.245456	0.302179
850	296	294	470	469	0.553467	21574.5	1.05048	3.78689	-0.00552486	138.137	342.276	0.0385177	2209.74	37.0048	0.0274349	0.00813923	0.264411	6.6247e-05	2176.3	36.745	0.0277863	0.00817844	0.274629	6.68869e-05	0.0821107	0.783102	0.208417	0.225154	0.232026	0.273149	0.220589	0.155475	0.182618	0.250433	0.232096	0.221913	0.237804	0.217141	0.224301	0.23571	0.229777	0.176691	0.15726	0.158749	0.167306	0.164052	0.141501	0.100695	0.083888
751	322	322	526	523	0.572593	32655	1.01983	3.49537	0	91.0203	604.733	0.613199	1561.19	30.498	0.0352233	0.00871621	0.538612	7.59723e-05	1574.76	30.6288	0.0338201	0.00871033	0.53438	7.58699e-05	0.82653	0.812651	0.337232	0.295683	0.327255	0.304317	0.196142	0.15468	0.25311	0.339267	0.251049	0.252874	0.318725	0.259812	0.221792	0.24106	0.390575	0.356651	0.289091	0.249068	0.341349	0.323006	0.239464	0.194201	0.239939
792	263	262	419	418	0.736243	10598.5	1	3.2069	0.0352941	122.441	318.907	0.135585	1279.42	27.8398	0.0381156	0.0100653	0.646126	0.00010131	1285.8	27.8411	0.0381453	0.010032	0.644177	0.00010064	0.645798	0.401946	0.245317	0.218998	0.241687	0.250398	0.126861	0.191077	0.327072	0.373075	0.264893	0.247735	0.257267	0.232926	0.252815	0.254055	0.293105	0.27004	0.2234	0.237929	0.310734	0.291873	0.230647	0.186484	0.238773
773	252	252	390	391	0.675305	7309	1	3.98718	-0.0131579	137.999	254.314	0	1022.82	24.754	0.0411306	0.0116438	0.479592	0.000135579	1046.04	24.9884	0.0414611	0.0116565	0.466325	0.000135874	0.49504	0.0209257	0.168788	0.159654	0.183094	0.197135	0.137125	0.121863	0.152259	0.21534	0.163558	0.162164	0.160024	0.170672	0.166896	0.182971	0.214998	0.186619	0.147651	0.162445	0.205392	0.180425	0.11739	0.073311	0.065485
877	272	271	431	429	0.645141	13491.5	2.06352	3.64384	0.0208333	127.84	315.592	0.0680428	1796.17	32.9732	0.0315484	0.00863068	0.551205	7.44887e-05	1784.43	32.9406	0.031894	0.00868587	0.553686	7.54444e-05	0.440062	0.76214	0.225761	0.235607	0.230477	0.294418	0.224265	0.145507	0.176734	0.265386	0.259213	0.214335	0.205096	0.186808	0.215236	0.264582	0.279244	0.252448	0.18864	0.186879	0.238645	0.252719	0.198852	0.185697	0.195006
816	279	280	450	448	0.699865	16393	1.03839	3.44628	-0.00840336	112.957	465.384	0.323675	1589.8	30.9689	0.0332981	0.00875351	0.590086	7.66239e-05	1579.26	30.8344	0.0337958	0.00879351	0.592774	7.73259e-05	0.669441	0.399097	0.380199	0.287839	0.264142	0.312764	0.212926	0.154275	0.238345	0.342186	0.246641	0.24994	0.297379	0.270016	0.209159	0.171994	0.202112	0.242406	0.251684	0.298979	0.313962	0.320245	0.238755	0.260383	0.199957
757	266	267	407	407	0.706296	9428	1.00479	3.80172	-0.00877193	110.894	290.694	0.346097	1378.79	28.7679	0.0367733	0.00919893	0.715122	8.46204e-05	1351.5	28.4898	0.0369755	0.00923564	0.720659	8.5297e-05	0.315162	0.957318	0.193788	0.238779	0.260125	0.259109	0.201215	0.192953	0.264183	0.317778	0.256793	0.255788	0.331832	0.344946	0.265097	0.231947	0.290431	0.323753	0.300306	0.317423	0.36385	0.374207	0.253954	0.238691	0.267802
851	255	256	396	394	0.677095	7919.5	1.66029	3.54023	-0.0117647	143.171	165.703	0	2128.23	36.2879	0.0271776	0.0087073	0.479108	7.5817e-05	2026.81	35.2969	0.0286078	0.00882351	0.503144	7.78543e-05	0.286787	0.421518	0.094669	0.112023	0.114506	0.118652	0.100056	0.081084	0.09304	0.125045	0.113171	0.095422	0.095815	0.099194	0.101704	0.114022	0.118591	0.102709	0.078712	0.101317	0.128548	0.126825	0.079986	0.067446	0.040506
834	326	311	513	490	0.587518	29115.5	2.99205	3.55838	-0.0307692	123.23	492.491	0.189349	1560.29	30.8875	0.0329146	0.00935141	0.423312	8.7449e-05	1558.01	30.9257	0.0332732	0.00933988	0.424397	8.72333e-05	0.0711944	0.496332	0.113354	0.137632	0.153299	0.199768	0.188698	0.169661	0.161456	0.199544	0.18606	0.201897	0.196068	0.170238	0.151536	0.167801	0.215754	0.223822	0.180574	0.167068	0.186944	0.192894	0.147793	0.126905	0.119317
765	242	241	366	364	0.671289	4285.5	1.65662	3.78667	-0.0136986	137.767	180.258	0	2218.49	37.0732	0.0292127	0.00902774	0.518123	8.15e-05	2128.89	36.2886	0.0267218	0.00916554	0.536351	8.40072e-05	0.146036	0.376128	0.244861	0.235228	0.201256	0.21199	0.166116	0.168599	0.185456	0.208898	0.166257	0.21505	0.262186	0.25215	0.190077	0.204233	0.298477	0.307274	0.258125	0.270462	0.331179	0.269365	0.167092	0.209973	0.258633
872	255	256	396	395	0.715128	7793.5	1.041	3.65116	0.0119048	136.992	223.957	0	2024.47	35.1204	0.0292018	0.00889049	0.55217	7.90408e-05	2046.47	35.2966	0.0283049	0.00881307	0.547152	7.76701e-05	0.221298	0.972688	0.125083	0.167383	0.18999	0.221857	0.186965	0.14949	0.158737	0.228901	0.191126	0.182696	0.169532	0.170852	0.168463	0.191132	0.182331	0.133443	0.125265	0.161205	0.209844	0.20425	0.167629	0.104517	0.067229
[truncated: 732 more columns]

## Sheet: Mixture 4
Table S4 Colony information of Mixture 4
index	x_micro	y_micro	nWidth	nHeight	Feature1	Feature2	Feature3	Feature4	Feature5	Feature6	Feature7	Feature8	Feature9	Feature10	Feature11	Feature12	Feature13	Feature14	Feature15	Feature16	Feature17	Feature18	Feature19	Feature20	Feature21	Feature22	Raman0	Raman1	Raman2	Raman3	Raman4	Raman5	Raman6	Raman7	Raman8	Raman9	Raman10	Raman11	Raman12	Raman13	Raman14	Raman15	Raman16	Raman17	Raman18	Raman19	Raman20	Raman21	Raman22
888	266	264	420	422	0.726209	10846	1.01629	3.28713	-0.010101	120.419	414.483	0.193528	1530.33	30.2978	0.0342246	0.00892135	0.634143	7.95905e-05	1495.63	29.9426	0.0344859	0.00895089	0.64209	8.01184e-05	0.392118	0.296463	0.181748	0.179246	0.177306	0.194729	0.183521	0.171817	0.178331	0.20291	0.177819	0.180605	0.213618	0.266259	0.215583	0.203807	0.205077	0.207399	0.180453	0.196321	0.221255	0.195442	0.180378	0.230302	0.254309
1076	262	261	415	416	0.736233	9997	1.01414	3.7963	-0.00943396	114.178	409.872	0.306892	1426.81	29.3861	0.03476	0.00906107	0.717485	8.2103e-05	1424.23	29.4145	0.0355216	0.00907501	0.717812	8.23559e-05	0.744781	0.860543	0.132144	0.15565	0.189461	0.17946	0.15937	0.156863	0.179179	0.19819	0.183693	0.161588	0.1647	0.195818	0.181052	0.150997	0.137575	0.175436	0.186695	0.173615	0.138397	0.130511	0.126993	0.190087	0.216979
945	279	278	409	408	0.747184	8779	1.01305	3.53271	-0.0666667	124.468	380.808	0.101378	1566.03	30.5484	0.033741	0.0090624	0.625465	8.2127e-05	1514.02	30.2138	0.0338348	0.00909292	0.637308	8.26812e-05	0.763683	0.872735	0.140198	0.165545	0.19762	0.268111	0.211009	0.130352	0.117213	0.198029	0.206352	0.169485	0.166543	0.215181	0.213802	0.232148	0.299538	0.328197	0.278311	0.253895	0.283834	0.229951	0.207857	0.233124	0.270002
1070	257	255	405	408	0.753625	8432.5	1.02662	3.59223	0.00990099	118.895	365.225	0.196857	1210.11	26.8832	0.039087	0.0102347	0.720251	0.00010475	1227.95	26.9288	0.0387404	0.0102516	0.716343	0.000105096	0.717758	0.480976	0.166042	0.183416	0.179494	0.219276	0.190799	0.152638	0.138607	0.174135	0.176971	0.187737	0.203499	0.216807	0.193182	0.240531	0.336183	0.325705	0.272018	0.318243	0.340818	0.21105	0.109837	0.19316	0.268201
996	253	253	399	400	0.727859	7517	1.01371	3.31183	0.021978	124.89	352.506	0.0803512	720.026	20.6971	0.0491413	0.0123291	0.688556	0.000152008	750.407	20.8092	0.0512483	0.012434	0.675122	0.000154605	0.521533	0.00779298	0.179797	0.188686	0.185964	0.205802	0.17121	0.15224	0.166527	0.171907	0.196442	0.146042	0.201381	0.232676	0.232335	0.210029	0.318504	0.324485	0.221817	0.239656	0.309276	0.22991	0.117927	0.147897	0.20711
990	269	269	400	400	0.714852	7576	1.0495	3.56471	0.0120482	124.82	355.977	0.0807814	1368.56	28.8058	0.0348642	0.00941051	0.71585	8.85578e-05	1398.91	28.9915	0.0353807	0.00941702	0.709455	8.86803e-05	0.354265	0.593238	0.154542	0.168422	0.164306	0.168591	0.173708	0.174532	0.166208	0.171508	0.178579	0.161899	0.149161	0.189923	0.206218	0.261653	0.301568	0.28889	0.236551	0.249025	0.269991	0.209654	0.151104	0.200438	0.262111
894	276	276	444	442	0.724463	15236.5	1.01163	3.4359	0.00649351	110.412	439.563	0.380074	833.271	22.1893	0.0488858	0.0114149	0.700815	0.0001303	836.54	22.3353	0.0457822	0.0113907	0.699539	0.000129748	0.737995	0.553714	0.149513	0.140231	0.159079	0.239803	0.228874	0.185322	0.16764	0.200521	0.193827	0.169034	0.168965	0.193355	0.163935	0.217482	0.318251	0.326443	0.241082	0.273989	0.356377	0.261742	0.180534	0.205318	0.261964
965	276	276	418	418	0.760377	10191	1.01428	3.31	-0.0816327	114.761	407.627	0.291335	1144.06	26.3242	0.0385824	0.00996092	0.742513	9.922e-05	1146.5	26.2785	0.038929	0.00998093	0.742045	9.9619e-05	0.357398	0.117518	0.113123	0.12905	0.168714	0.187043	0.169055	0.152137	0.140497	0.163224	0.166247	0.178496	0.185036	0.201793	0.16456	0.205375	0.258571	0.268102	0.225886	0.231473	0.248113	0.195023	0.175915	0.176106	0.182589
954	254	254	391	392	0.768138	6267.5	1.03758	3.29333	0	124.784	375.116	0.0976466	1364.86	28.6672	0.0356567	0.00965509	0.728478	9.32207e-05	1359.73	28.5384	0.0371272	0.00962888	0.729484	9.27153e-05	0.594432	0.363028	0.174374	0.180959	0.18588	0.192257	0.154733	0.130339	0.148055	0.1917	0.217789	0.194164	0.182542	0.206544	0.234828	0.278115	0.360792	0.322114	0.283696	0.297337	0.364913	0.252987	0.205887	0.246804	0.281217
1023	249	250	396	397	0.758707	6696.5	1.00836	3.67164	0.0153846	124.928	357.791	0.0713806	1270.26	27.6904	0.0380142	0.0100154	0.732921	0.000100308	1274.7	27.6025	0.0399289	0.0100521	0.732031	0.000101044	0.457412	0.611599	0.219564	0.22162	0.214883	0.189322	0.167979	0.164601	0.200884	0.226405	0.213127	0.164094	0.15399	0.189577	0.196276	0.232254	0.267341	0.284749	0.24448	0.242052	0.239652	0.179951	0.166901	0.191181	0.23898
1061	266	265	419	419	0.755226	10584.5	1.06102	3.68085	-0.0217391	114.663	388.834	0.288252	1272.05	27.5194	0.0401619	0.0095643	0.726935	9.14759e-05	1263.5	27.4453	0.0382646	0.00956829	0.728571	9.15522e-05	0.2014	0.978697	0.229624	0.234906	0.222041	0.216164	0.200957	0.175598	0.17929	0.207617	0.19481	0.178297	0.186313	0.2079	0.200749	0.221382	0.316746	0.337219	0.305055	0.268311	0.305271	0.252962	0.192932	0.229761	0.276121
1049	258	257	407	410	0.745879	9171	1.87598	3.28283	-0.0206186	115.31	426.256	0.297787	1196.58	26.4436	0.03923	0.0103532	0.740385	0.00010719	1189.36	26.3289	0.0394743	0.0103937	0.74215	0.00010803	0.751644	0.595286	0.159128	0.222478	0.183199	0.124781	0.1164	0.138498	0.139794	0.130039	0.155584	0.174253	0.219908	0.248527	0.22597	0.194843	0.197708	0.226912	0.243447	0.248203	0.231372	0.20649	0.210628	0.231127	0.250536
1020	322	277	414	416	0.7796	9851.5	1.01158	4.02913	0.019802	115.127	450.907	0.334467	1148.23	26.0665	0.0410064	0.00983374	0.758701	9.67024e-05	1161.35	26.3719	0.0391391	0.00979446	0.756139	9.59314e-05	0.296861	0.91624	0.258957	0.27533	0.297204	0.3084	0.249273	0.206072	0.226973	0.300018	0.293977	0.224634	0.188931	0.230896	0.237392	0.298111	0.353417	0.359557	0.287256	0.388827	0.42703	0.339773	0.209592	0.266246	0.321345
952	239	237	368	369	0.736801	4073.5	1.01504	3.71429	0	138.382	283.152	0	1763.68	32.7082	0.032671	0.00934441	0.669082	8.73179e-05	1682.62	32.105	0.0330765	0.00931797	0.683879	8.68245e-05	0.723416	0.2324	0.154286	0.165094	0.185794	0.208848	0.167091	0.122497	0.138297	0.199685	0.193899	0.168446	0.174526	0.190512	0.18948	0.256046	0.311836	0.291225	0.24058	0.255282	0.286569	0.210585	0.150069	0.217558	0.263365
1057	252	252	398	400	0.728381	7476	2.43382	3.22619	-0.0853659	122.11	391.821	0.1561	1291.25	27.8296	0.036989	0.00988827	0.705693	9.77779e-05	1281.43	27.5894	0.0386319	0.00994016	0.707902	9.88069e-05	0.399379	0.727857	0.155875	0.172132	0.206308	0.232694	0.204379	0.17669	0.160922	0.170419	0.176533	0.168137	0.159729	0.16633	0.143616	0.204338	0.272231	0.280262	0.217283	0.281054	0.321412	0.233606	0.158689	0.212827	0.239368
1046	254	255	406	406	0.782349	8627	2.57114	3.82105	0.0107527	115.464	422.747	0.291527	466.276	16.4983	0.0631393	0.0158094	0.77014	0.000249939	511.659	16.7544	0.0615375	0.0158311	0.748011	0.000250624	0.927577	0.763857	0.158563	0.17546	0.200738	0.2163	0.195267	0.175786	0.186488	0.215506	0.206844	0.178771	0.171022	0.183017	0.174413	0.202718	0.293463	0.344039	0.291437	0.288316	0.351342	0.261448	0.15388	0.180955	0.255505
1069	241	241	378	378	0.766905	4572.5	1.0192	3.23457	0.0126582	125.007	365.121	0.0898852	1371.41	28.6746	0.0369154	0.0100626	0.745235	0.000101256	1282.41	27.7639	0.0387813	0.0100972	0.76164	0.000101953	0.206096	0.152456	0.181364	0.179055	0.182026	0.186072	0.180425	0.189457	0.224361	0.247074	0.21249	0.203768	0.234132	0.27403	0.214939	0.239786	0.31206	0.326203	0.269363	0.25765	0.283312	0.218483	0.155289	0.197362	0.261234
897	252	252	400	401	0.717247	7561	1.0126	3.7561	-0.0125	130.644	354.267	0.0125645	1584.12	31.1711	0.0335095	0.00907073	0.60006	8.22782e-05	1612	31.2751	0.0334374	0.00909116	0.592356	8.26491e-05	0.531551	0.957845	0.135997	0.141343	0.159877	0.186686	0.187146	0.169176	0.166884	0.189528	0.193106	0.196033	0.208595	0.220905	0.191998	0.209075	0.239691	0.255806	0.237956	0.243268	0.230662	0.186469	0.187336	0.257995	0.277268
924	232	232	361	360	0.739013	3073.5	1.01906	3.60317	0.0327869	137.788	316.346	0	1233.9	27.186	0.0379748	0.0108947	0.745233	0.000118695	1211.9	26.9198	0.0393441	0.0109412	0.749293	0.000119711	0.250455	0.974791	0.185767	0.178138	0.176009	0.18026	0.15563	0.147813	0.158712	0.175584	0.180399	0.159687	0.153055	0.186872	0.190991	0.204169	0.287361	0.311604	0.269833	0.299599	0.366452	0.288295	0.178142	0.226273	0.285645
1063	259	257	413	411	0.745958	9247.5	1	3.92857	0.0208333	118.724	377.942	0.203514	973.489	24.1298	0.0441964	0.0108042	0.711719	0.000116732	982.987	24.2412	0.0428599	0.0108084	0.708862	0.000116821	0.467988	0.808757	0.149473	0.1739	0.189347	0.203661	0.185298	0.157837	0.160787	0.231954	0.224366	0.187949	0.173283	0.240458	0.214526	0.251312	0.315587	0.331804	0.25793	0.321833	0.350281	0.257123	0.152027	0.221783	0.270968
977	266	242	421	367	0.589324	6415.5	1.02375	3.88393	-0.00909091	134.333	268.377	0	1249.81	27.2559	0.0381767	0.0102092	0.721573	0.000104227	1293.67	27.701	0.0389767	0.0101908	0.711601	0.000103852	0.240856	0.728735	0.132495	0.132911	0.130497	0.135777	0.128038	0.117371	0.122598	0.16214	0.214084	0.175499	0.124091	0.151053	0.165194	0.188741	0.293522	0.364742	0.299351	0.284408	0.298858	0.215551	0.164232	0.194065	0.206808
1088	243	242	368	369	0.762382	4048	2.57173	3.70968	-0.0166667	128.89	309.749	0.0242095	1458.11	29.6563	0.0348661	0.0101551	0.727845	0.000103127	1373.67	28.9483	0.0347807	0.0101697	0.743608	0.000103423	0.0490971	0.742209	0.170682	0.200608	0.234564	0.228341	0.171674	0.132617	0.180271	0.253276	0.220056	0.156813	0.161161	0.206951	0.213628	0.218704	0.273731	0.308805	0.275135	0.226399	0.237156	0.193328	0.174588	0.18776	0.234622
1090	244	244	388	387	0.69185	5985.5	1.02765	3.70732	-0.0375	127.373	302.257	0.0290703	1727.87	32.2642	0.0330034	0.00900807	0.643175	8.11454e-05	1770.46	32.5908	0.0321966	0.00899732	0.634388	8.09518e-05	0.518717	0.221945	0.11139	0.119794	0.125737	0.149859	0.126332	0.107743	0.112982	0.143418	0.169419	0.155548	0.138975	0.142305	0.161933	0.195869	0.244674	0.273346	0.27142	0.265989	0.250999	0.18032	0.163873	0.215961	0.254524
1074	271	271	398	400	0.792743	7247	1.05919	3.43902	0.0125	115.261	395.983	0.282462	1103.81	25.3627	0.0402104	0.0105863	0.771946	0.00011207	1109.39	25.5972	0.042831	0.0105723	0.770662	0.000111774	0.6359	0.0816847	0.149867	0.154331	0.202283	0.245303	0.161143	0.136254	0.194221	0.240394	0.202315	0.184268	0.177314	0.190832	0.209388	0.204872	0.195682	0.198997	0.216172	0.230156	0.229869	0.191473	0.177078	0.219128	0.249065
173	1119	1122	1645	1630	0.735117	1.39118e+06	1.00472	3.73718	-0.000802568	42.1608	263.858	0.976599	96.8006	7.26606	0.149052	0.0418153	0.601404	0.00174852	96.4302	7.2361	0.149506	0.0418792	0.602984	0.00175387	0.411569	0.953355	0.065868	0.085039	0.086322	0.108751	0.096127	0.093308	0.118232	0.153862	0.154372	0.124238	0.126683	0.135327	0.153039	0.147565	0.150049	0.127918	0.117244	0.121826	0.143378	0.167308	0.164334	0.167643	0.162868
174	1117	1121	1644	1629	0.723625	1389280	1.00331	3.60537	0.00158103	42.0965	264.295	0.976797	84.4977	6.78318	0.158393	0.0447442	0.600944	0.00200205	84.5284	6.75864	0.159009	0.0448105	0.600839	0.00200798	0.481026	0.30865	0.113726	0.104418	0.106268	0.154271	0.153566	0.140259	0.178429	0.225876	0.187801	0.150927	0.168505	0.208188	0.204225	0.213971	0.212561	0.143968	0.102974	0.166951	0.249999	0.229015	0.183311	0.174956	0.163791
175	957	1057	1876	1660	0.669623	1698882	2.02858	3.59797	-0.00290698	54.6115	285.201	0.965208	153.954	9.01358	0.12177	0.0352736	0.634945	0.00124423	151.64	8.9587	0.122237	0.0353243	0.640382	0.00124781	0.181629	0.548634	0.088512	0.104761	0.092881	0.108147	0.111383	0.108209	0.133726	0.160233	0.145212	0.121655	0.146295	0.147053	0.132217	0.12238	0.14385	0.115868	0.098814	0.108235	0.127349	0.12326	0.124697	0.121145	0.099713
176	963	966	1368	1378	0.713117	905234	1.01868	3.52799	-0.000967118	48.1505	322.527	0.978994	201.02	10.5312	0.105536	0.0284586	0.584	0.000809894	200.032	10.4974	0.106146	0.0285088	0.586075	0.000812752	0.321319	0.146813	0.064696	0.078335	0.086998	0.119702	0.116806	0.116129	0.128793	0.162998	0.153486	0.140967	0.157451	0.175682	0.163655	0.158151	0.165433	0.131243	0.093525	0.144574	0.189466	0.182779	0.155804	0.164686	0.142954
177	988	988	1462	1462	0.709094	1.0464e+06	1.00577	3.55795	0	43.9215	301.131	0.971667	148.706	8.99465	0.122763	0.033636	0.59317	0.00113138	146.555	8.93626	0.123471	0.0337075	0.599119	0.00113619	0.845533	0.436895	0.086996	0.090158	0.089529	0.126467	0.128045	0.114981	0.117626	0.152519	0.129577	0.11687	0.141867	0.164999	0.145015	0.130949	0.145683	0.127453	0.108298	0.121448	0.161192	0.179886	0.163686	0.142027	0.117988
178	516	524	787	763	0.654784	170600	1.05886	3.63288	-0.00226244	61.4792	708.452	0.871263	672.79	19.6186	0.0563699	0.0143053	0.573345	0.000204642	664.884	19.5253	0.0566986	0.0143141	0.578609	0.000204894	0.186904	0.261121	0.112558	0.122732	0.122535	0.120601	0.135818	0.133699	0.143387	0.172343	0.137708	0.105468	0.112883	0.155214	0.134381	0.12662	0.135366	0.111996	0.086975	0.13153	0.185362	0.190739	0.145471	0.127744	0.092815
179	1427	1459	2062	2080	0.710452	2470110	1.02183	3.56542	-0.000592768	49.3487	176.73	0.979355	204.843	10.353	0.107301	0.0312421	0.68934	0.000976068	203.458	10.309	0.107842	0.0312878	0.691468	0.000978928	0.417291	0.3488	0.066257	0.084923	0.082617	0.079758	0.087485	0.093447	0.115652	0.130735	0.10529	0.083054	0.101792	0.128591	0.123432	0.12419	0.137922	0.118283	0.082395	0.108394	0.141317	0.123611	0.105768	0.127629	0.128214
180	1212	1206	1710	1713	0.71863	1554579	3.14854	3.52889	0.00074184	44.7456	272.74	0.973598	135.679	8.54819	0.129289	0.0358403	0.592786	0.00128453	135.775	8.53496	0.129752	0.0358878	0.59251	0.00128793	0.989035	0.803366	0.11954	0.169515	0.150824	0.132826	0.132866	0.130991	0.147802	0.164624	0.142859	0.128142	0.144846	0.149809	0.15765	0.177832	0.189174	0.109623	0.068997	0.148371	0.223275	0.211679	0.1667	0.170908	0.132459
181	1091	1087	1728	1722	0.655706	1599503	1.01546	3.65199	0.000723066	48.8714	333.756	0.959672	70.8507	6.14717	0.172712	0.0503383	0.544192	0.00253395	70.2737	6.12238	0.173688	0.0504164	0.547946	0.00254182	0.2366	0.80323	0.079126	0.095573	0.076328	0.075051	0.081963	0.088803	0.101667	0.137015	0.117344	0.092279	0.084532	0.118489	0.126287	0.135636	0.130309	0.096802	0.072321	0.11022	0.157325	0.159133	0.124617	0.119283	0.107207
182	1160	1157	1649	1660	0.664951	1.43815e+06	1.04114	3.66422	-0.00220264	48.7245	357.014	0.955558	242.635	11.6423	0.0957969	0.0257427	0.469743	0.000662685	241.406	11.6044	0.096109	0.0257791	0.472419	0.00066456	0.916832	0.704506	0.072557	0.071924	0.073163	0.11436	0.118066	0.103245	0.112159	0.151674	0.132747	0.103188	0.123003	0.151805	0.14934	0.133605	0.117997	0.082513	0.076081	0.109388	0.133385	0.118721	0.118626	0.129889	0.130388
341	263	264	410	409	0.658602	9861	1.00073	3.20635	-0.0645161	142.638	252.369	0.00010141	967.981	24.3145	0.0417873	0.0118367	0.407849	0.000140108	977.689	24.3487	0.0427338	0.0118132	0.401138	0.000139552	0.980582	0.0216027	0.117236	0.098063	0.120268	0.163988	0.179977	0.158199	0.137659	0.158175	0.160387	0.127535	0.144891	0.168884	0.186562	0.160195	0.150451	0.106857	0.119293	0.148846	0.161943	0.136598	0.113843	0.091084	0.095465
367	263	262	411	410	0.702223	9616.5	1.00478	3.56989	-0.0769231	136.95	212.216	0	1940.44	34.5655	0.02884	0.00888201	0.425285	7.88901e-05	1914.56	34.3428	0.0282161	0.00892186	0.432391	7.95996e-05	0.236462	0.268314	0.176655	0.262861	0.203373	0.154933	0.128464	0.181433	0.190948	0.256553	0.239075	0.181608	0.163502	0.178647	0.199348	0.174703	0.187008	0.188871	0.161859	0.144942	0.142162	0.180997	0.147097	0.091109	0.067896
358	269	269	421	419	0.731544	10742	1.00521	3.62857	-0.00970874	134.629	294.634	0.000930925	1962.52	34.6868	0.0302928	0.00858687	0.521586	7.37343e-05	1954.93	34.5326	0.0311668	0.00862227	0.523233	7.43436e-05	0.191007	0.391699	0.184519	0.20831	0.205741	0.203631	0.164501	0.146446	0.161753	0.216264	0.2141	0.18436	0.152126	0.125972	0.152352	0.199944	0.231039	0.205483	0.190918	0.214661	0.202009	0.185999	0.141073	0.138842	0.118476
373	260	258	401	405	0.54768	9734	2.02527	3.83471	0	140.305	147.87	0	2271.33	37.4959	0.0272313	0.00884551	0.267532	7.82431e-05	2292.64	37.6782	0.0266243	0.0088497	0.25967	7.83173e-05	0.634442	0.951662	0.152544	0.180732	0.175708	0.184225	0.174134	0.18465	0.184538	0.219315	0.19988	0.148596	0.160154	0.221255	0.251716	0.214814	0.18808	0.158179	0.136755	0.1694	0.206309	0.203536	0.148662	0.110633	0.128771
345	272	273	429	429	0.636296	12738	1.00658	3.49231	0.0078125	145.209	204.806	0	1840.9	33.5823	0.0302258	0.00890752	0.440659	7.93439e-05	1830.57	33.4444	0.0308215	0.00891838	0.443487	7.95374e-05	0.484909	0.893047	0.161936	0.158287	0.112519	0.150298	0.175935	0.151053	0.118077	0.143516	0.161036	0.118887	0.141524	0.179134	0.201648	0.150505	0.141948	0.126998	0.124061	0.128089	0.134146	0.114466	0.100159	0.094059	0.108565
376	294	284	406	410	0.664147	8997	1.07077	3.48113	0	149.235	196.798	0	1548.94	30.7011	0.0336178	0.00974316	0.412341	9.49291e-05	1570.89	30.9267	0.0337356	0.00970554	0.403562	9.41976e-05	0.00594284	0.85703	0.152173	0.141343	0.137985	0.209736	0.232174	0.214534	0.190177	0.242556	0.245406	0.200218	0.187565	0.241234	0.256486	0.198331	0.161512	0.168463	0.167118	0.1646	0.170411	0.186644	0.155213	0.126691	0.126175
354	256	257	403	398	0.616957	8200.5	1.04237	4.00901	-0.00917431	156.553	192.333	0	1303.58	28.2825	0.0356247	0.0106021	0.384294	0.000112404	1265.99	27.7732	0.0376508	0.0106757	0.401304	0.000113971	0.208248	0.675941	0.182451	0.162386	0.144703	0.169269	0.186944	0.143439	0.165366	0.186836	0.237557	0.187643	0.210019	0.204757	0.228663	0.182532	0.184928	0.176181	0.195224	0.223497	0.234463	0.193556	0.135667	0.131438	0.161651
353	266	267	417	417	0.684978	10420	1.69518	4.05825	0.00990099	141.955	221.54	0	2250.3	37.104	0.0279176	0.0084072	0.418343	7.0681e-05	2269.22	37.3138	0.027904	0.00842076	0.411785	7.09093e-05	0.798846	0.693224	0.137404	0.131653	0.163976	0.192538	0.186342	0.170378	0.190618	0.193315	0.170222	0.105127	0.139011	0.142627	0.168413	0.158927	0.251547	0.248347	0.185079	0.166188	0.188718	0.17878	0.125833	0.090655	0.084337
360	283	284	422	419	0.710553	10860	1.01316	3.69298	0.0178571	129.91	312.879	0.0279926	1599.33	31.3527	0.0322456	0.00893794	0.577151	7.98867e-05	1632.28	31.6132	0.0318707	0.0088979	0.5679	7.91726e-05	0.65075	0.574674	0.15654	0.163227	0.151017	0.14614	0.133542	0.105911	0.12344	0.189837	0.17509	0.123719	0.126986	0.166148	0.187122	0.17618	0.178484	0.164651	0.1437	0.124317	0.126248	0.119453	0.110709	0.092159	0.082395
347	262	263	410	411	0.626753	9588	1.01499	3.50962	0.0588235	152.274	208.638	0	1869.59	33.8969	0.030788	0.00917231	0.400562	8.41313e-05	1873.1	34.0337	0.0297338	0.00916376	0.398067	8.39744e-05	0.375186	0.274669	0.124674	0.133988	0.135511	0.162668	0.140988	0.14221	0.144806	0.194961	0.174394	0.098295	0.123585	0.145908	0.183519	0.172755	0.258367	0.223604	0.165183	0.136031	0.155512	0.13448	0.099422	0.09518	0.113331
340	275	277	422	421	0.68518	11513.5	1.01024	3.7551	0.0208333	143.441	229.413	0	1990.16	34.9308	0.0288152	0.00872074	0.429889	7.60513e-05	1934.69	34.5408	0.0294446	0.00874365	0.44543	7.64514e-05	0.301947	0.248798	0.152893	0.157645	0.170892	0.186502	0.174282	0.163216	0.152098	0.165963	0.163983	0.167901	0.165252	0.14233	0.154373	0.193969	0.2377	0.193568	0.172565	0.159799	0.154057	0.125186	0.133947	0.159761	0.145604
332	276	274	419	420	0.636938	11097	1.85072	3.88889	0	146.498	207.36	0	1301.41	28.3154	0.0360335	0.0103378	0.461574	0.00010687	1344.64	28.6599	0.0352897	0.0103072	0.442892	0.000106239	0.313669	0.621845	0.128504	0.144857	0.1801	0.21578	0.19483	0.142341	0.156374	0.226337	0.21102	0.125228	0.137725	0.186265	0.205348	0.186528	0.274137	0.258604	0.187755	0.168588	0.174261	0.172391	0.126889	0.104288	0.078416
365	265	265	413	412	0.654101	10452	1.00575	3.51351	0	145.375	249.265	0	2123.59	36.2662	0.0273566	0.00859275	0.414132	7.38353e-05	2103.79	35.9352	0.02855	0.00860738	0.418274	7.4087e-05	0.0674486	0.956994	0.114185	0.14469	0.160825	0.172475	0.151423	0.133826	0.118936	0.146455	0.152935	0.139738	0.148785	0.170783	0.187779	0.180592	0.218037	0.186513	0.111835	0.093694	0.129319	0.157588	0.113638	0.086511	0.070608
336	275	276	418	416	0.686634	10522.5	1.00873	3.65789	0.0267857	147.711	211.887	0	2179.11	36.6205	0.0279762	0.00846265	0.439519	7.16165e-05	2206.59	36.7647	0.0285434	0.00846853	0.432173	7.17159e-05	0.23825	0.0588818	0.146241	0.168212	0.181582	0.227946	0.210189	0.167761	0.152776	0.206647	0.204567	0.140527	0.144003	0.202687	0.248638	0.223815	0.25678	0.249025	0.215423	0.182132	0.180189	0.159534	0.124169	0.084657	0.093465
331	260	260	412	414	0.629671	9673.5	1.02496	3.78	0.0204082	133.731	231.638	0.00103375	1988.52	35.0855	0.029605	0.00877087	0.385084	7.69282e-05	2028.49	35.3196	0.029169	0.00876111	0.3722	7.67571e-05	0.502216	0.452526	0.129382	0.1689	0.168992	0.159497	0.14193	0.120529	0.107068	0.153201	0.156014	0.139616	0.107344	0.102923	0.154139	0.200247	0.212567	0.17123	0.131749	0.135287	0.146338	0.148991	0.110783	0.067947	0.052977
334	270	268	416	414	0.636215	10248	1.01616	3.384	-0.0243902	150.957	206.535	0	1950.96	34.5091	0.029547	0.00897039	0.420509	8.04678e-05	1896.93	34.0681	0.0316913	0.00902161	0.435506	8.13895e-05	0.241686	0.51802	0.222368	0.246478	0.243467	0.224202	0.193664	0.163557	0.213491	0.279276	0.247119	0.153226	0.193976	0.190516	0.211485	0.20178	0.33217	0.263791	0.173175	0.157342	0.204585	0.171508	0.115972	0.116471	0.135048
369	258	259	413	408	0.67505	9939.5	1.04281	3.25758	-0.00769231	139.386	208.607	0	1898.23	34.1829	0.0293443	0.00885055	0.440152	7.83323e-05	1850.99	33.6814	0.0293525	0.00885252	0.454821	7.83672e-05	0.214012	0.242091	0.149396	0.195973	0.19425	0.197564	0.171724	0.156139	0.170621	0.212145	0.196044	0.140537	0.147409	0.18151	0.194215	0.155601	0.139309	0.137326	0.148027	0.155486	0.144057	0.123239	0.112492	0.094746	0.105816
374	269	269	420	422	0.607613	11021	1.01435	3.61468	-0.00934579	130.253	183.324	0.00244987	2305.76	37.7133	0.0269078	0.00849689	0.354138	7.21972e-05	2328.29	37.844	0.0277479	0.00848839	0.347524	7.20527e-05	0.281235	0.0898544	0.147301	0.128584	0.120851	0.161312	0.183566	0.188391	0.177234	0.17882	0.167267	0.151741	0.170187	0.168034	0.201838	0.205694	0.219912	0.176738	0.144505	0.163134	0.179642	0.168374	0.096688	0.092966	0.106506
375	269	309	419	419	0.694482	10631	1.08121	3.32184	0.0941176	148.009	195.189	0	1856.15	33.8624	0.0291534	0.00888961	0.419303	7.90253e-05	1865.29	33.9415	0.0301604	0.00891647	0.414901	7.95035e-05	0.362277	0.0640743	0.11137	0.121524	0.128829	0.109905	0.102034	0.124539	0.155509	0.165902	0.148146	0.08617	0.103442	0.100966	0.161152	0.168767	0.210888	0.174768	0.16013	0.18074	0.190593	0.146471	0.122107	0.104807	0.081142
343	281	279	419	418	0.653038	10734.5	1.00216	3.33051	-0.0172414	144.55	250.259	0	1899.61	34.2154	0.0307652	0.00891941	0.426872	7.95559e-05	1910.86	34.3122	0.0300026	0.00891679	0.422209	7.95091e-05	0.626309	0.849248	0.077448	0.087628	0.109403	0.119709	0.098366	0.08484	0.108579	0.141877	0.119661	0.092629	0.092805	0.110393	0.115184	0.115314	0.151926	0.12543	0.09809	0.095512	0.119911	0.100754	0.066071	0.047121	0.030558
337	266	265	415	415	0.672156	10390	1.01324	3.81818	-0.00925926	146.844	252.09	0	2024.03	35.2953	0.0291217	0.00870816	0.452979	7.58321e-05	2030.93	35.3118	0.0289787	0.00871595	0.449993	7.59677e-05	0.807791	0.115285	0.109504	0.112018	0.138709	0.163279	0.152518	0.136952	0.137581	0.193021	0.182043	0.114089	0.11574	0.184411	0.209907	0.17462	0.213939	0.199094	0.153474	0.116631	0.133642	0.137139	0.11713	0.091717	0.094367
344	267	266	413	413	0.663017	10057	1.01217	3.50877	0	150.516	204.791	0	2121.3	36.1199	0.0287093	0.00868776	0.400205	7.54771e-05	2087.73	35.9683	0.0278508	0.0087243	0.409245	7.61135e-05	0.00554541	0.536696	0.141073	0.163035	0.166481	0.158776	0.113476	0.109445	0.155488	0.220812	0.212316	0.137338	0.162216	0.200955	0.240589	0.202454	0.236175	0.20479	0.185016	0.177281	0.189684	0.176476	0.147225	0.134699	0.127801
352	263	265	416	413	0.630256	10152	1.05523	3.60909	0.0277778	146.873	179.514	0	2187.48	36.5211	0.0285909	0.0086733	0.384785	7.52261e-05	2162.78	36.2078	0.0294381	0.00867826	0.391232	7.53122e-05	0.798923	0.0802858	0.148305	0.191405	0.210551	0.212736	0.191855	0.151862	0.161525	0.214258	0.224469	0.145839	0.164351	0.169641	0.18368	0.215161	0.321409	0.261736	0.199165	0.177975	0.218558	0.21496	0.176163	0.104295	0.084021
362	272	274	422	422	0.684263	11483	1.00479	3.63934	0.00833333	143.483	234.17	0	1906.84	34.227	0.0299124	0.00875268	0.452518	7.66094e-05	1928.72	34.5171	0.0289889	0.00874143	0.445414	7.64125e-05	0.0252424	0.724963	0.168218	0.166618	0.163353	0.168809	0.174055	0.154097	0.17616	0.179507	0.18066	0.145948	0.158306	0.177669	0.193651	0.169117	0.173006	0.18648	0.158288	0.158228	0.144913	0.157198	0.125719	0.120298	0.115269
95	1034	1008	1257	1248	0.130013	556689	1.75538	3.66289	0.00252366	112.521	451.776	0.286666	186.441	10.5815	0.0934434	0.0297527	0.223723	0.000885223	184.34	10.5274	0.0937989	0.0297837	0.232813	0.000887066	0.721184	0.852417	0.074341	0.111562	0.126221	0.125291	0.108397	0.083486	0.068559	0.084039	0.086772	0.099199	0.110052	0.093519	0.068957	0.082244	0.103382	0.093958	0.069481	0.109284	0.115738	0.118565	0.053766	0.075468	0.082032
191	974	948	1357	1319	0.138375	661949	1.08452	3.70029	0.003544	92.8478	503.08	0.554884	658.615	20.0634	0.0511447	0.015537	0.15275	0.000241399	654.789	20.0071	0.0510863	0.0155518	0.157109	0.000241859	0.453089	0.831168	0.129484	0.140409	0.128664	0.116991	0.119598	0.123101	0.14655	0.169286	0.150199	0.123288	0.129511	0.145504	0.141029	0.14758	0.16708	0.125105	0.096742	0.121358	0.160712	0.14745	0.120719	0.111453	0.077714
94	1117	1186	1263	1253	0.154578	503289	1	3.7564	-0.0014652	111.197	385.653	0.289543	484.639	17.2632	0.0583785	0.0181791	0.130108	0.000330478	480.842	17.2047	0.058412	0.0181941	0.136808	0.000331026	0.0163925	0.0780861	0.135055	0.162704	0.177788	0.164348	0.135751	0.083205	0.095621	0.141084	0.173487	0.191414	0.203308	0.162009	0.110132	0.144841	0.160775	0.161223	0.104295	0.157766	0.182556	0.195938	0.070889	0.069937	0.110277
194	1525	1537	1876	1961	0.0607914	1.75451e+06	2.34112	3.71301	-0.00192864	110.911	679.153	0.3333	259.196	12.5731	0.0795451	0.0246928	0.168236	0.000609734	258.286	12.5473	0.0796895	0.024706	0.171026	0.000610387	0.948252	0.8047	0.052424	0.065808	0.056949	0.062013	0.083231	0.091582	0.097768	0.102004	0.079255	0.05748	0.07419	0.091968	0.089708	0.063067	0.063377	0.047951	0.035898	0.038986	0.065857	0.070759	0.064468	0.051272	0.041088
92	847	909	1096	1158	0.169478	468192	118.26	3.59323	-0.00247934	111.155	407.659	0.293937	232.667	11.9242	0.0831294	0.0264115	0.137526	0.000697567	228.904	11.8351	0.0836492	0.0264527	0.151191	0.000699743	0.123923	0.972633	0.09735	0.088572	0.123886	0.178368	0.165416	0.111525	0.105067	0.135536	0.161739	0.16353	0.150539	0.124734	0.126418	0.15072	0.157276	0.12472	0.090146	0.104659	0.132593	0.147129	0.095564	0.092025	0.114341
188	1133	1179	1553	1481	0.132227	806314	1.65172	3.70486	0.00054615	94.8505	422.487	0.519482	209.157	11.3091	0.0877521	0.0275608	0.150949	0.000759598	207.39	11.2578	0.0881165	0.0275912	0.158393	0.000761276	0.660952	0.0479301	0.108848	0.12974	0.110428	0.125333	0.124297	0.121207	0.134186	0.156868	0.136678	0.102296	0.127012	0.148066	0.156516	0.152398	0.168953	0.100748	0.040151	0.076538	0.169468	0.152716	0.093626	0.080757	0.09055
80	934	924	1130	1198	0.148174	473334	1	3.68134	0.00672646	118.611	403.932	0.20572	77.6782	6.65574	0.143359	0.0475199	0.279187	0.00225814	75.5617	6.63227	0.14334	0.047546	0.297029	0.00226062	0.971046	0.672826	0.085737	0.115799	0.128242	0.154243	0.144075	0.106039	0.102284	0.127477	0.139112	0.124192	0.122171	0.116115	0.115159	0.1198	0.118109	0.109274	0.091075	0.121232	0.133847	0.143369	0.065614	0.082295	0.108597
87	850	916	1097	1163	0.157783	453074	55.2194	3.6685	0	109.837	389.115	0.308824	229.378	11.8069	0.0841481	0.026698	0.155495	0.000712783	226.206	11.7254	0.0846945	0.026742	0.166957	0.000715132	0.929764	0.566436	0.07913	0.063233	0.070041	0.128022	0.131459	0.086007	0.076017	0.119318	0.158976	0.16087	0.164909	0.157445	0.137149	0.117719	0.086636	0.092738	0.088655	0.156603	0.175404	0.166286	0.052397	0.059121	0.115743
72	624	690	959	945	0.212526	249840	1.09109	3.66294	-0.00997506	112.732	407.903	0.286331	871.033	23.1775	0.0436567	0.0136798	0.104576	0.000187137	857.897	23.0182	0.0438386	0.0137065	0.117222	0.000187869	0.63205	0.139951	0.43986	0.340773	0.355388	0.379552	0.430753	0.258372	0.25376	0.27313	0.399637	0.345501	0.458765	0.456558	0.466806	0.37627	0.327093	0.302898	0.352109	0.345013	0.350087	0.347503	0.307556	0.225028	0.267567
93	824	809	1065	1103	0.139216	380716	1.15087	3.58814	0.00081367	123.973	411.162	0.157188	387.087	15.4569	0.0642369	0.0203675	0.119917	0.000414836	385.277	15.4132	0.0648572	0.0203838	0.123655	0.0004155	0.596487	0.918185	0.101825	0.151285	0.159793	0.154138	0.146071	0.093632	0.096327	0.114752	0.149717	0.140794	0.198581	0.194044	0.147016	0.117759	0.131422	0.128217	0.09967	0.101532	0.101898	0.096569	0.056452	0.08564	0.126088
76	855	842	1017	994	0.166552	283234	2.18137	3.69006	0.00195312	122.441	342.885	0.149918	494.187	17.443	0.0576031	0.0181214	0.124125	0.000328385	488.172	17.3401	0.0576228	0.0181493	0.134441	0.000329398	0.126958	0.088551	0.088202	0.093479	0.10432	0.13392	0.117581	0.083066	0.085621	0.114883	0.143398	0.15547	0.16005	0.148461	0.134797	0.135388	0.136866	0.14473	0.122588	0.141237	0.153204	0.147846	0.054016	0.040657	0.107612
71	749	736	953	1062	0.179248	254500	1.37236	3.70525	0.00107411	115.119	307.479	0.220432	645.13	19.9091	0.0507444	0.0159314	0.119815	0.00025381	637.054	19.7965	0.0508721	0.0159489	0.130408	0.000254368	0.293152	0.982217	0.10064	0.086758	0.093509	0.129038	0.146719	0.100312	0.098188	0.123635	0.153773	0.142781	0.14015	0.128965	0.121462	0.116609	0.117512	0.114853	0.108945	0.129217	0.137015	0.134225	0.073757	0.084192	0.119825
74	835	868	1125	1157	0.139729	388515	1.03921	3.68649	-0.00232019	116.965	337.367	0.198801	837.341	22.7115	0.0444701	0.0138898	0.119757	0.000192927	832.751	22.645	0.0448783	0.0138994	0.124261	0.000193193	0.887593	0.95818	0.125366	0.152866	0.148496	0.139185	0.145004	0.112925	0.088965	0.083821	0.124274	0.140471	0.131444	0.096547	0.099723	0.095897	0.090012	0.09198	0.08765	0.130833	0.136355	0.129769	0.044224	0.071164	0.097431
190	1295	1384	1686	1884	0.107664	1.2055e+06	1	3.73701	-0.0032	90.2794	379.577	0.612488	351.965	14.6624	0.0687799	0.0212408	0.154574	0.00045117	348.152	14.5892	0.0689704	0.0212679	0.163514	0.000452325	0.418627	0.456713	0.079302	0.075757	0.050788	0.064965	0.080269	0.092661	0.107706	0.116994	0.091258	0.06774	0.087025	0.102177	0.103966	0.103216	0.11103	0.068135	0.036283	0.059394	0.099318	0.098395	0.066398	0.055511	0.037184
184	1502	1507	1894	1854	0.130919	1348916	1	3.69534	0.00201126	88.0059	419.118	0.655429	613.7	19.3575	0.0528529	0.0160635	0.162323	0.000258038	607.678	19.2531	0.0530948	0.0160847	0.170249	0.000258716	0.53996	0.915645	0.134346	0.167955	0.154177	0.144799	0.15431	0.150877	0.182452	0.230399	0.172029	0.113862	0.134401	0.197951	0.191867	0.181163	0.176888	0.127874	0.088799	0.119998	0.173717	0.179781	0.156985	0.132865	0.09754
81	812	805	1067	1080	0.229531	373638	1.04767	3.71055	0.00906344	105.101	474.32	0.39048	293.887	13.3837	0.0746278	0.0234974	0.153071	0.000552126	292.478	13.3508	0.0747199	0.0235144	0.156686	0.000552929	0.871683	0.942056	0.157828	0.182551	0.192498	0.199693	0.175483	0.10825	0.12377	0.165256	0.200082	0.178271	0.247795	0.247817	0.222302	0.173849	0.180231	0.158232	0.126181	0.181699	0.233772	0.215579	0.076371	0.052405	0.120239
85	670	662	843	828	0.240051	147792	1.01625	3.75994	-0.00460123	108.338	339.526	0.336535	384.186	15.1568	0.0663401	0.0211044	0.219262	0.000445394	367.222	14.968	0.0666392	0.0211356	0.253497	0.000446714	0.872879	0.108338	0.108521	0.134986	0.150569	0.158473	0.130538	0.076189	0.085969	0.121308	0.156799	0.145114	0.179345	0.191345	0.173287	0.122865	0.111408	0.105966	0.09317	0.087808	0.097676	0.118884	0.063977	0.058892	0.099524
196	1012	987	1180	1164	0.228923	502621	8.38258	3.72586	0	89.5039	512.978	0.625322	212.632	11.3327	0.0879719	0.0275259	0.165161	0.000757676	210.257	11.2776	0.0884937	0.0275577	0.172982	0.000759429	0.500561	0.914414	0.091502	0.112356	0.146353	0.154466	0.146853	0.129658	0.183052	0.209105	0.187918	0.135233	0.126541	0.166637	0.172766	0.166395	0.181487	0.144179	0.09509	0.139189	0.204614	0.220188	0.154957	0.156009	0.08454
83	627	614	846	830	0.217621	147838	1	3.66132	-0.0128824	108.397	339.421	0.335104	422.062	15.9355	0.0633497	0.0200372	0.206663	0.000401491	410.782	15.852	0.062949	0.0200357	0.227789	0.000401429	0.95851	0.453684	0.165859	0.233036	0.305346	0.342552	0.272089	0.179016	0.187958	0.278451	0.291931	0.285017	0.302597	0.298475	0.275205	0.262594	0.247359	0.261637	0.246407	0.313508	0.338915	0.351888	0.160571	0.176217	0.256711
77	1015	1029	1256	1244	0.183889	605056	1.12321	3.63796	-0.00140252	110.728	421.188	0.302797	86.7785	7.12234	0.134548	0.0442549	0.28062	0.0019585	85.9549	7.08737	0.134879	0.0442971	0.284671	0.00196223	0.777162	0.589985	0.100319	0.132107	0.146285	0.16917	0.153403	0.08438	0.049187	0.095951	0.143492	0.14676	0.142262	0.136145	0.131916	0.122011	0.110333	0.110269	0.103241	0.148638	0.167212	0.158124	0.055111	0.072486	0.129514
84	826	824	1198	1175	0.131555	492207	1	3.80247	-0.000686813	117.091	398.961	0.219887	168.966	10.1505	0.0967064	0.0309059	0.149873	0.000955174	168.019	10.1253	0.0968801	0.0309208	0.154385	0.000956096	0.429813	0.543563	0.112353	0.124093	0.126415	0.138196	0.129606	0.073113	0.082527	0.121743	0.160315	0.154387	0.174356	0.161466	0.136116	0.107624	0.119024	0.117757	0.077101	0.103553	0.113793	0.12195	0.048016	0.072717	0.108907
97	569	567	800	802	0.211872	148880	1.26734	3.54648	-0.0112994	120.721	293.447	0.149845	228.24	11.8367	0.0826944	0.0267573	0.15618	0.000715955	227.107	11.8151	0.0832671	0.0267714	0.158903	0.00071671	0.0848223	0.0553195	0.089484	0.08719	0.091737	0.120686	0.123651	0.088129	0.08675	0.125886	0.162852	0.153462	0.144877	0.130907	0.122088	0.136065	0.127441	0.120175	0.098849	0.156629	0.1631	0.138055	0.046692	0.053873	0.100548
183	1317	1373	1686	1832	0.120134	1464288	1.48065	3.68692	0	92.2995	535.852	0.569342	372.785	15.0457	0.0675797	0.0205911	0.17785	0.000423994	368.433	14.9615	0.0677012	0.0206192	0.187033	0.000425151	0.363576	0.832684	0.072503	0.082191	0.08134	0.115851	0.112238	0.094425	0.112632	0.141293	0.119532	0.095072	0.110142	0.116408	0.104764	0.094074	0.101607	0.068707	0.049547	0.090106	0.137542	0.134081	0.093909	0.087615	0.061239
197	1056	957	1468	1315	0.12094	693246	2.31513	3.63552	-0.00218818	96.3485	423.469	0.501293	1232.34	27.5049	0.0373778	0.0113482	0.145226	0.000128782	1219.77	27.3663	0.0375586	0.0113629	0.153496	0.000129115	0.00353221	0.817251	0.084584	0.086884	0.077275	0.078151	0.094229	0.096389	0.107495	0.118366	0.081737	0.059247	0.065708	0.118121	0.137207	0.141082	0.118208	0.075328	0.048252	0.092317	0.143101	0.119431	0.074566	0.064257	0.034198
258	293	295	472	468	0.545496	22630.5	2.44867	3.59884	0.0352941	128.355	303.763	0.035704	1878.22	33.9643	0.0309576	0.00905564	0.207731	8.20045e-05	1863.45	33.9574	0.0297081	0.00905037	0.212561	8.19091e-05	0.422543	0.455818	0.032206	0.040681	0.070527	0.102895	0.111676	0.094415	0.091184	0.098785	0.107025	0.099157	0.095792	0.088147	0.089591	0.087614	0.108682	0.091195	0.067379	0.060567	0.076853	0.072628	0.082019	0.091129	0.070463
228	276	277	428	426	0.667171	15136.5	6.62577	3.69421	-0.0588235	133.543	279.045	0.000660655	824.33	22.4596	0.0453041	0.0125206	0.345816	0.000156766	858.57	22.9013	0.0449216	0.0124522	0.317718	0.000155056	0.927455	0.707929	0.06198	0.082287	0.085964	0.092241	0.085099	0.084527	0.080596	0.086837	0.07849	0.080122	0.084227	0.081172	0.072457	0.069597	0.082123	0.074344	0.058446	0.067578	0.078903	0.078549	0.085226	0.104322	0.071773
250	341	340	518	524	0.599296	35900.5	1.16736	3.51643	0.014218	107.967	405.953	0.390357	1938.48	34.3232	0.0305859	0.0083416	0.340914	6.95823e-05	1926.78	34.3453	0.0300619	0.00833263	0.344043	6.94326e-05	0.273842	0.888658	0.047691	0.073928	0.086046	0.087491	0.090368	0.087816	0.08495	0.084442	0.081161	0.081835	0.090634	0.090425	0.076956	0.088743	0.106181	0.086123	0.04997	0.063823	0.087619	0.086571	0.084581	0.081823	0.053894
259	320	322	509	504	0.545034	31212.5	1.46846	3.68519	0.00934579	118.774	347.142	0.197453	2089.32	35.7535	0.0283486	0.00834953	0.256324	6.97147e-05	2080.14	35.7295	0.0289777	0.00836965	0.259414	7.00511e-05	0.245033	0.768817	0.054585	0.086467	0.088039	0.079565	0.086222	0.100856	0.093687	0.085252	0.075073	0.089771	0.104588	0.109069	0.100894	0.085644	0.08275	0.070533	0.060167	0.076389	0.092268	0.083597	0.080869	0.091027	0.069244
246	326	324	458	456	0.616173	21618	1.70142	3.4	0	115.524	461.836	0.333703	2042.5	35.3291	0.0295138	0.0079655	0.350692	6.34492e-05	2085.28	35.8524	0.0286202	0.00794746	0.33576	6.31621e-05	0.937668	0.343487	0.064949	0.089441	0.091828	0.078336	0.085454	0.090808	0.09244	0.093982	0.089277	0.068406	0.073829	0.088492	0.09744	0.092069	0.113965	0.095367	0.064576	0.058094	0.08074	0.074516	0.077805	0.092313	0.073176
256	317	317	483	486	0.572295	26558	1.85896	3.68108	0.00546448	122.818	367.114	0.148204	2001.84	35.1407	0.0299655	0.00850016	0.25136	7.22527e-05	1983.6	34.9222	0.0291575	0.0085144	0.256967	7.24949e-05	0.709623	0.490369	0.048585	0.080959	0.077843	0.067668	0.077451	0.089435	0.086087	0.084993	0.090324	0.089312	0.08777	0.074121	0.071406	0.069085	0.100472	0.082066	0.052654	0.043802	0.06711	0.06023	0.072015	0.081231	0.050623
238	334	340	546	552	0.59414	45553.5	1.04266	3.34661	-0.0361446	101.626	552.613	0.478185	1566.73	30.7856	0.0336296	0.00916826	0.35668	8.4057e-05	1552.75	30.6412	0.0332845	0.00917924	0.36207	8.42585e-05	0.607529	0.037355	0.076832	0.105039	0.10549	0.11648	0.12597	0.121327	0.106588	0.112311	0.108172	0.12497	0.123901	0.11353	0.092469	0.091199	0.106779	0.097021	0.074791	0.062412	0.083841	0.084312	0.080711	0.078265	0.066616
281	299	298	480	477	0.591767	25779.5	1.84187	3.36612	-0.0331492	121.201	392.497	0.183479	1614.44	31.4501	0.0335529	0.00920186	0.344057	8.46742e-05	1614.16	31.5056	0.0329809	0.00920557	0.343622	8.47425e-05	0.200401	0.174895	0.055718	0.075648	0.093502	0.096044	0.105366	0.098451	0.101262	0.105237	0.096385	0.082833	0.093187	0.095067	0.099636	0.101124	0.11163	0.09015	0.068751	0.07583	0.095385	0.102433	0.098567	0.116136	0.085134
232	502	499	699	703	0.554027	123885	1.10664	3.72158	0	95.975	708.724	0.562578	689.795	20.3451	0.0511184	0.0146179	0.306258	0.000213682	692.766	20.3277	0.051213	0.0146205	0.303272	0.000213759	0.372396	0.499907	0.057541	0.089459	0.099188	0.103492	0.120368	0.109559	0.105199	0.100869	0.09838	0.097884	0.106068	0.105715	0.105126	0.100915	0.108318	0.08583	0.067574	0.09076	0.113802	0.094351	0.074387	0.102277	0.091592
240	314	295	445	449	0.59273	17767.5	2.98247	3.68047	0.011976	119.9	281.168	0.139356	2218.58	37.029	0.0260166	0.00799274	0.362991	6.38838e-05	2264.07	37.4988	0.0265255	0.00798192	0.348494	6.37111e-05	0.335544	0.865244	0.059792	0.082476	0.092627	0.106464	0.102403	0.105061	0.100766	0.108425	0.102798	0.109577	0.118235	0.109974	0.087998	0.103851	0.132181	0.110034	0.07168	0.080768	0.109023	0.103076	0.091647	0.087418	0.070433
277	301	300	480	483	0.575137	25114	1.14998	3.58571	0	115.386	372.232	0.270208	1895.76	33.9529	0.030881	0.00849662	0.337129	7.21926e-05	1877.69	33.8689	0.0302438	0.00849776	0.343858	7.2212e-05	0.580713	0.527617	0.033323	0.041801	0.045518	0.066391	0.074833	0.073014	0.068376	0.088492	0.085454	0.086763	0.085802	0.093603	0.085444	0.104017	0.121324	0.097187	0.055757	0.067315	0.092919	0.088286	0.08116	0.089082	0.066086
261	325	325	530	533	0.631125	41386.5	1.14342	3.60811	0.00454545	111.679	571.439	0.346417	599.621	19.0717	0.053532	0.0150582	0.357417	0.000226748	601.362	19.1094	0.0532211	0.0150488	0.355932	0.000226467	0.301053	0.680534	0.055826	0.073704	0.080079	0.094807	0.108799	0.113229	0.104479	0.099268	0.087408	0.09094	0.104575	0.113705	0.102731	0.094604	0.103572	0.088206	0.079139	0.096513	0.111092	0.097229	0.090351	0.101051	0.083772
297	418	418	604	612	0.583053	72926	1.1787	3.73968	-0.00638978	99.762	577.301	0.49989	590.649	18.8888	0.0541261	0.0156587	0.312701	0.000245196	592.314	18.8971	0.0542624	0.0156642	0.310217	0.000245367	0.346795	0.105684	0.054283	0.076745	0.085098	0.078143	0.09025	0.097425	0.096348	0.083493	0.082186	0.094849	0.093569	0.088106	0.074941	0.070466	0.082464	0.077719	0.072382	0.079567	0.100044	0.070133	0.078423	0.092495	0.079373
263	373	372	579	576	0.575546	58543	1.04813	3.75273	0	97.2554	648.625	0.526519	1255.5	27.6972	0.0373905	0.0104969	0.27197	0.000110185	1268.87	27.8206	0.0371162	0.0104949	0.26388	0.000110142	0.0921861	0.0529393	0.089498	0.116966	0.130274	0.138475	0.148023	0.138712	0.125715	0.126793	0.124483	0.124422	0.132457	0.146843	0.118382	0.130313	0.153218	0.13928	0.084569	0.09778	0.139414	0.135597	0.133624	0.141921	0.115735
298	566	563	652	918	0.378439	165360	2.35245	3.67043	0.00189036	100.23	576.664	0.599409	1201.1	27.0471	0.0382886	0.0110716	0.252248	0.000122581	1205.42	27.0879	0.0381823	0.0110674	0.249621	0.000122488	0.944366	0.27845	0.040369	0.044019	0.050706	0.070116	0.086592	0.103046	0.106765	0.099566	0.082693	0.090013	0.108992	0.103593	0.07706	0.057622	0.077043	0.063181	0.046561	0.041111	0.062526	0.055405	0.07742	0.109266	0.094612
273	501	494	703	690	0.488094	122014	2.6291	3.471	0.032634	94.6436	729.221	0.594265	1046.46	25.1546	0.0415934	0.0116032	0.294998	0.000134635	1054.67	25.211	0.0415344	0.0116026	0.289134	0.000134621	0.334836	0.702627	0.04569	0.095563	0.095694	0.094055	0.095965	0.100838	0.085968	0.078252	0.073348	0.074742	0.087344	0.098865	0.087961	0.065646	0.084303	0.083473	0.070996	0.083107	0.105234	0.090233	0.092467	0.104815	0.070528
303	444	430	679	652	0.408509	99740.5	1.08101	3.80769	-0.00241546	110.79	467.015	0.345085	1356.97	28.9739	0.035533	0.0108047	0.117949	0.000116742	1346.89	28.9017	0.0346846	0.0108209	0.123387	0.000117092	0.4212	0.633246	0.067662	0.090979	0.10979	0.112746	0.113638	0.108022	0.105957	0.102979	0.106946	0.111027	0.115145	0.112978	0.103777	0.094682	0.103697	0.087419	0.077806	0.086133	0.107326	0.095878	0.087718	0.094417	0.081105
295	544	666	1105	778	0.357952	261692	1.88439	3.77396	0	93.1264	624.649	0.585627	1405.56	29.1602	0.0357713	0.0103912	0.237829	0.000107977	1367.91	28.7826	0.0363093	0.010432	0.258094	0.000108826	0.00602789	0.566366	0.057808	0.08626	0.089864	0.094357	0.107204	0.11599	0.102276	0.095031	0.092884	0.099867	0.113623	0.102087	0.085452	0.072993	0.091002	0.067294	0.047955	0.053547	0.084528	0.083627	0.074498	0.074691	0.069027
284	341	335	541	555	0.508895	45285	3.10228	3.53992	0.00383142	100.017	456.312	0.476118	1806.5	33.1728	0.030568	0.00874507	0.325364	7.64762e-05	1792.36	33.0154	0.0314996	0.00875696	0.330165	7.66843e-05	0.779767	0.853386	0.0407	0.069486	0.072843	0.070415	0.068921	0.071405	0.078887	0.082682	0.077408	0.075223	0.076972	0.076279	0.070861	0.064747	0.07197	0.069757	0.049027	0.050889	0.067006	0.083008	0.088497	0.078223	0.043038
268	485	444	765	580	0.31807	86882	1.08152	3.68539	0.00451467	109.948	661.518	0.373633	769.851	21.6891	0.047131	0.013521	0.301151	0.000182818	763.707	21.576	0.0476238	0.0135389	0.30677	0.000183302	0.676906	0.897765	0.065529	0.092425	0.102209	0.100673	0.104335	0.096967	0.096816	0.1054	0.103635	0.103518	0.120039	0.112573	0.095452	0.081435	0.104024	0.095053	0.086816	0.095273	0.107497	0.091228	0.087847	0.093825	0.064684
237	324	326	528	527	0.588351	37319.5	1.03681	3.76744	0	108.438	445.459	0.381088	1779.38	32.8623	0.0315238	0.00868318	0.330124	7.53977e-05	1752.81	32.609	0.0319401	0.00869864	0.339388	7.56664e-05	0.904226	0.737987	0.039183	0.041116	0.064662	0.087058	0.09459	0.096741	0.084302	0.0734	0.068092	0.086895	0.097305	0.084612	0.077423	0.078339	0.087835	0.064755	0.054651	0.075539	0.094709	0.078107	0.064995	0.086121	0.067283
289	364	370	604	616	0.530127	69401.5	1.05168	3.50329	0.00662252	103.926	377.278	0.440956	1985.89	34.5919	0.0304144	0.00866294	0.248942	7.50465e-05	1991.33	34.7088	0.0305572	0.00865373	0.247022	7.4887e-05	0.772878	0.366163	0.097823	0.128261	0.141556	0.119511	0.144411	0.127562	0.126846	0.117673	0.114609	0.118808	0.120153	0.12068	0.119879	0.125491	0.148414	0.13341	0.119248	0.119189	0.12198	0.104535	0.1257	0.148632	0.098579
233	333	330	514	520	0.582219	33695.5	3.91337	3.54464	-0.0045045	111.704	396.754	0.328026	802.706	22.1346	0.0463287	0.0125756	0.399611	0.000158147	868.229	22.5045	0.0463654	0.0125706	0.35102	0.000158021	0.857153	0.782821	0.072452	0.098813	0.096317	0.093908	0.098789	0.095535	0.086776	0.088526	0.081016	0.080268	0.097659	0.104327	0.087344	0.075636	0.080877	0.074186	0.067943	0.071459	0.079134	0.073723	0.082541	0.101563	0.082002
275	349	351	527	527	0.561107	41344.5	1.01322	3.48444	0.0044843	117.156	449.136	0.264025	1100.91	25.877	0.0394446	0.0115239	0.257708	0.0001328	1084.65	25.7634	0.0392936	0.0115322	0.268253	0.000132992	0.693985	0.0429754	0.060655	0.093972	0.105469	0.104829	0.104454	0.108035	0.107822	0.128544	0.110052	0.104913	0.107103	0.123972	0.103927	0.084452	0.084836	0.076362	0.05967	0.061955	0.086748	0.089444	0.080484	0.092595	0.077715
207	455	453	800	805	0.827964	197424	1.01296	3.41649	-0.00424628	55.1316	248.308	0.96485	402.516	14.1584	0.0841528	0.0229241	0.888084	0.000525515	392.781	14.0214	0.0849217	0.0229621	0.89096	0.000527259	0.61766	0.0514655	0.107364	0.126522	0.101894	0.109074	0.117307	0.117493	0.129916	0.149378	0.119945	0.08972	0.132067	0.15926	0.156246	0.138479	0.157005	0.112942	0.082003	0.097545	0.128568	0.128678	0.099334	0.090402	0.056855
215	326	324	537	538	0.825413	43563	2.02799	3.42424	0	58.3518	361.965	0.943232	543.884	16.6897	0.0732473	0.0181399	0.902032	0.000329055	540.13	16.6214	0.0738423	0.0181774	0.902925	0.000330419	0.296902	0.542415	0.123289	0.123789	0.130313	0.181851	0.17113	0.166342	0.179173	0.24944	0.208242	0.154789	0.141453	0.178073	0.168964	0.174963	0.202545	0.163321	0.098575	0.147796	0.208862	0.208647	0.142189	0.13582	0.077239
199	373	373	543	531	0.848284	43576.5	1.06052	3.71698	-0.00952381	52.0491	414.643	0.950788	430.642	15.3355	0.0740409	0.019311	0.880548	0.000372913	418.003	15.1223	0.0749919	0.0193588	0.884262	0.000374763	0.0434181	0.938072	0.148659	0.160915	0.149475	0.174143	0.206968	0.20581	0.223625	0.252468	0.197661	0.163571	0.183914	0.25635	0.219727	0.206888	0.224306	0.179765	0.11973	0.154434	0.261671	0.243217	0.184503	0.141049	0.097706
223	315	314	521	526	0.852771	39438.5	1.04387	3.57416	0.00966184	59.0533	389.442	0.937282	487.27	15.9132	0.0746348	0.0188143	0.895163	0.000353976	470.102	15.7659	0.074122	0.0187886	0.899072	0.000353012	0.405653	0.955693	0.135969	0.144435	0.120678	0.11888	0.135085	0.152443	0.170223	0.217912	0.182279	0.150222	0.11649	0.175748	0.205947	0.215648	0.208407	0.153993	0.100679	0.151624	0.24496	0.232649	0.158594	0.143484	0.091769
210	331	335	543	534	0.849938	44933	1.0468	3.52308	0	51.3963	383.551	0.958182	477.743	15.5426	0.079835	0.0197571	0.908281	0.000390341	458.05	15.3216	0.0800195	0.01975	0.912252	0.000390064	0.206132	0.622204	0.156077	0.180741	0.145132	0.167779	0.156599	0.186801	0.183065	0.218352	0.170449	0.149368	0.174223	0.229409	0.231435	0.22287	0.220604	0.169128	0.121546	0.173876	0.222399	0.216758	0.168162	0.145144	0.105048
208	418	419	609	595	0.827304	72234.5	11.0183	3.47586	0.00694444	60.7821	308.724	0.944867	437.445	15.5696	0.0716189	0.0189402	0.840223	0.000358731	431.406	15.4581	0.0712005	0.0189652	0.842683	0.000359678	0.368875	0.214294	0.107428	0.113636	0.109601	0.14181	0.161907	0.164245	0.175271	0.173234	0.130909	0.11688	0.135842	0.158036	0.149749	0.155412	0.162226	0.141994	0.119047	0.157881	0.185852	0.167634	0.117346	0.122145	0.095355
212	315	316	517	523	0.848295	37863	1.03039	3.70283	0.00952381	56.2394	407.53	0.94076	471.738	15.9584	0.0718609	0.018367	0.888715	0.000337345	460.147	15.7923	0.072452	0.0184159	0.891667	0.000339147	0.361817	0.189203	0.138055	0.146052	0.15221	0.185017	0.179563	0.164174	0.180555	0.245469	0.202509	0.157382	0.176371	0.226615	0.209105	0.186471	0.217006	0.178917	0.132083	0.141988	0.207397	0.21188	0.173476	0.132636	0.082256
200	303	306	506	503	0.860463	32615	1.02011	3.54315	0	52.0424	390.351	0.955113	537.392	16.3983	0.077833	0.0191463	0.916121	0.000366581	510.1	16.1227	0.0770814	0.0191531	0.920555	0.000366841	0.707115	0.35536	0.156637	0.17617	0.173422	0.164989	0.147061	0.148667	0.162442	0.204153	0.152703	0.140991	0.145967	0.173439	0.189254	0.219305	0.224016	0.132447	0.093347	0.112179	0.143042	0.15114	0.135243	0.134509	0.08644
222	367	365	543	523	0.855513	42928.5	1.09375	3.53774	0	54.1473	370.952	0.953213	454.286	15.6695	0.0738593	0.0191022	0.874431	0.000364893	440.816	15.4895	0.0741303	0.0191099	0.878371	0.000365188	0.655923	0.269344	0.181653	0.217805	0.189088	0.203712	0.178711	0.177359	0.17765	0.254577	0.231536	0.204425	0.198235	0.214563	0.201689	0.211502	0.225976	0.157876	0.109044	0.140481	0.197903	0.191538	0.157281	0.152961	0.128359
204	301	305	506	502	0.858404	32242.5	1.08322	3.34615	0	52.1667	394.278	0.954268	470.746	15.9956	0.0726607	0.018741	0.876225	0.000351226	441.846	15.5586	0.0734936	0.0187958	0.884068	0.000353282	0.0406832	0.668018	0.118444	0.121203	0.114755	0.149359	0.156189	0.156498	0.161691	0.204092	0.176564	0.144596	0.142777	0.174957	0.166278	0.166469	0.161142	0.114493	0.072202	0.095058	0.15102	0.151257	0.120035	0.111907	0.090725
201	553	565	819	865	0.75078	226885	1.19351	3.70425	0.00371058	55.7428	267.639	0.965392	359.519	13.9841	0.0806689	0.0215505	0.831041	0.000464424	352.154	13.852	0.0816024	0.0215791	0.834523	0.000465656	0.483889	0.460432	0.08312	0.11756	0.103436	0.104294	0.098217	0.105418	0.103783	0.14326	0.126263	0.106433	0.105113	0.134329	0.141707	0.128956	0.138623	0.081589	0.052524	0.102944	0.16158	0.135557	0.082569	0.075321	0.043743
211	493	491	806	807	0.804821	203640	1.03527	3.4267	-0.0043956	60.4558	242.067	0.957938	482.513	16.0676	0.071193	0.0191617	0.846196	0.000367173	474.851	15.9467	0.0722377	0.0191935	0.848807	0.000368389	0.165066	0.193875	0.094177	0.085556	0.090942	0.106077	0.098009	0.097353	0.118679	0.146309	0.115607	0.094845	0.098912	0.126252	0.124437	0.156732	0.175435	0.120767	0.064486	0.110983	0.167235	0.160331	0.101999	0.079021	0.039735
214	421	424	733	730	0.831467	146666	1.00984	3.70316	0	56.1689	280.622	0.956415	344.669	13.2761	0.0891194	0.0234631	0.880494	0.000550518	335.222	13.1565	0.0889605	0.0235171	0.883859	0.000553054	0.509402	0.615297	0.100295	0.106345	0.099251	0.125325	0.152781	0.156973	0.154013	0.164789	0.145862	0.130078	0.122857	0.152482	0.163553	0.173339	0.169004	0.137919	0.105067	0.140319	0.188221	0.179653	0.102963	0.097333	0.074151
202	353	352	517	512	0.852391	36007	1.02053	3.27473	0.0111111	52.5419	388.203	0.953676	403.86	14.7981	0.0772368	0.0203341	0.882755	0.000413475	389.678	14.5612	0.0776044	0.0203971	0.887098	0.000416041	0.444221	0.0953597	0.150184	0.190763	0.15095	0.176361	0.186942	0.191848	0.173847	0.232231	0.198068	0.167398	0.158572	0.205695	0.203758	0.214709	0.199676	0.147391	0.104198	0.201372	0.271396	0.22871	0.125566	0.132128	0.094262
203	590	588	869	863	0.81991	251649	1.02849	3.46014	0.00363636	54.1816	256.513	0.966127	444.786	15.6661	0.0713115	0.0190547	0.783992	0.00036308	436.424	15.5635	0.0719617	0.0190982	0.788199	0.000364741	0.0363233	0.910235	0.074521	0.085802	0.105055	0.135407	0.117365	0.108509	0.103987	0.14301	0.114894	0.084914	0.081167	0.124385	0.143613	0.137142	0.150916	0.113019	0.073802	0.067477	0.113924	0.114122	0.088087	0.078969	0.062957
220	391	393	566	575	0.843848	57910.5	1.37834	3.56471	-0.00790514	55.2773	358.656	0.950398	411.629	14.9585	0.0755125	0.0198077	0.867169	0.000392343	401.091	14.818	0.0757738	0.0198597	0.870776	0.000394409	0.987351	0.702452	0.141637	0.163804	0.148383	0.174001	0.19365	0.185986	0.16843	0.191109	0.150851	0.136875	0.14224	0.195829	0.198367	0.206633	0.203106	0.149525	0.108965	0.172752	0.206098	0.196722	0.130564	0.134125	0.080779
216	366	373	514	552	0.820314	42782	46.4619	3.3379	-0.0138249	66.2707	357.024	0.915665	542.564	17.4967	0.0623372	0.0166419	0.84624	0.000276952	542.578	17.4817	0.063082	0.0166587	0.846461	0.000277512	0.950252	0.527035	0.146863	0.160894	0.156639	0.155438	0.163485	0.159398	0.180186	0.227254	0.197268	0.172268	0.171527	0.199381	0.196654	0.205508	0.234107	0.182831	0.145258	0.191895	0.249906	0.230632	0.171013	0.146871	0.102597
221	470	471	833	833	0.826242	221418	1.53302	3.70866	0.00197628	53.4396	256.73	0.966812	403.472	14.1806	0.0844646	0.0228912	0.885101	0.000524006	397.206	14.0879	0.0847546	0.0229045	0.887022	0.000524617	0.40866	0.39245	0.103471	0.138227	0.11707	0.115695	0.124419	0.118483	0.102525	0.116588	0.108603	0.099035	0.126823	0.161586	0.154012	0.146974	0.152834	0.116361	0.0946	0.128881	0.156457	0.14991	0.118074	0.109003	0.078416
217	349	346	520	514	0.843819	36877	1.0385	3.52406	-0.0108108	53.9328	426.109	0.944518	422.679	15.2878	0.0722133	0.0190857	0.888295	0.000364265	417.203	15.1583	0.0743469	0.0191217	0.889954	0.000365641	0.815966	0.868931	0.138985	0.158633	0.152482	0.129432	0.11359	0.146674	0.179706	0.213349	0.154138	0.111366	0.125675	0.212282	0.231725	0.217872	0.217558	0.154571	0.113928	0.166785	0.250926	0.216705	0.136189	0.114383	0.093619
224	488	484	839	847	0.826429	230362	1.01415	3.46545	-0.00204082	53.1452	232.08	0.970813	380.274	13.7146	0.0872866	0.0240304	0.885593	0.000577462	372.443	13.6126	0.0877599	0.0240554	0.888093	0.000578664	0.257348	0.045285	0.096259	0.107423	0.107334	0.105569	0.106789	0.104821	0.11228	0.133105	0.11789	0.089306	0.108437	0.147809	0.167276	0.137191	0.134392	0.098245	0.084262	0.110285	0.154707	0.137962	0.088191	0.064181	0.028731
219	369	368	531	535	0.840993	41844	1.02087	3.5567	0	51.2978	433.218	0.950172	379.612	14.4106	0.0781579	0.0201539	0.868981	0.000406179	370.368	14.2925	0.0787555	0.020162	0.872422	0.000406507	0.972098	0.845199	0.137095	0.147408	0.166598	0.19408	0.178603	0.177299	0.201417	0.232886	0.206153	0.158305	0.157715	0.176463	0.223053	0.248347	0.2669	0.195355	0.147917	0.159133	0.20394	0.214133	0.165477	0.15607	0.12856
206	272	271	436	436	0.822091	14013	1.01863	3.625	0	65.162	599.751	0.871334	591.776	18.2817	0.0608204	0.0132456	0.879903	0.000175445	582.503	18.167	0.0602934	0.0132004	0.881963	0.000174252	0.94712	0.431266	0.10826	0.128944	0.116274	0.136302	0.130803	0.126261	0.141902	0.183093	0.146739	0.106657	0.115405	0.169296	0.178065	0.165894	0.167086	0.128094	0.108705	0.132155	0.157932	0.14219	0.129918	0.125446	0.08845
209	347	346	508	513	0.842419	34479.5	1.0262	3.58373	0	54.6709	442.918	0.940037	443.801	15.6112	0.0724732	0.0188519	0.886318	0.000355395	433.073	15.4151	0.072417	0.0188912	0.88929	0.000356876	0.611977	0.856079	0.067006	0.070053	0.095239	0.149868	0.143463	0.149085	0.171404	0.232452	0.171679	0.128545	0.158402	0.219202	0.212413	0.184592	0.185173	0.135118	0.114551	0.142187	0.192361	0.17698	0.138048	0.114683	0.079648
213	339	344	546	531	0.843658	45583.5	1.55046	3.69271	0	61.3242	376.333	0.931258	529.681	16.8358	0.0697664	0.0174863	0.880358	0.000305771	507.425	16.5693	0.0694347	0.0175081	0.885596	0.000306534	0.863353	0.350126	0.170912	0.205577	0.193196	0.190038	0.168308	0.17929	0.190563	0.242854	0.211113	0.199798	0.19978	0.23602	0.238503	0.233603	0.215881	0.168434	0.137216	0.155891	0.207491	0.218601	0.192075	0.161065	0.126266
717	2570	2564	952	859	0.524533	284880	3.26105	3.80775	0.00972447	89.0853	805.382	0.685631	339.781	14.0272	0.0758512	0.0206188	0.433846	0.000425136	331.65	13.8294	0.0767073	0.0207079	0.446875	0.000428817	0.248624	0.774779	0.083001	0.105122	0.109643	0.102179	0.088974	0.07439	0.078956	0.102879	0.114868	0.110547	0.109369	0.095489	0.082721	0.07816	0.09733	0.111016	0.101531	0.090889	0.09677	0.096002	0.081889	0.068616	0.074628
511	373	375	575	573	0.654929	49112.5	1.91087	3.58796	0	70.631	677.321	0.816228	1891.11	33.5019	0.0323904	0.00804589	0.38854	6.47364e-05	1889.52	33.4238	0.0331644	0.00805791	0.388783	6.49299e-05	0.645823	0.688207	0.101927	0.107875	0.156005	0.195421	0.175603	0.146069	0.159792	0.167842	0.12555	0.130824	0.188184	0.194864	0.18439	0.177543	0.249582	0.216462	0.175484	0.150302	0.224191	0.205661	0.152698	0.147494	0.145615
723	2587	2579	864	881	0.407917	231372	1.15105	3.70787	0.00161031	75.3503	1100.36	0.839421	620.128	19.0011	0.0569823	0.0151654	0.401333	0.000229989	605.49	18.8262	0.0569124	0.0152014	0.415489	0.000231083	0.520718	0.3161	0.125616	0.140206	0.138302	0.147399	0.122523	0.105543	0.106462	0.132825	0.105255	0.11431	0.133877	0.138773	0.115696	0.121421	0.13654	0.14388	0.134343	0.137779	0.164084	0.172043	0.128736	0.085699	0.079635
745	2520	2596	894	848	0.374924	231986	2.94732	3.71609	0	76.0817	1173.17	0.68623	587.067	18.5146	0.0587157	0.0155766	0.40398	0.00024263	575.929	18.3591	0.0587681	0.0156162	0.41532	0.000243866	0.516111	0.737467	0.115982	0.12892	0.146524	0.146019	0.11194	0.065673	0.099968	0.137397	0.118164	0.109831	0.133795	0.139284	0.129019	0.117988	0.114791	0.12225	0.124827	0.112794	0.101827	0.104912	0.090791	0.077215	0.073576
556	795	764	896	1294	0.242321	426720	1.32781	3.73304	0.00626118	85.0415	1140.01	0.619475	133.532	8.84895	0.113606	0.0337141	0.296347	0.00113664	132.65	8.85606	0.112903	0.0337029	0.300913	0.00113588	0.404739	0.245499	0.09824	0.112866	0.108435	0.111108	0.109619	0.085222	0.093826	0.088751	0.07459	0.083581	0.108084	0.12293	0.132179	0.15914	0.15664	0.140015	0.121973	0.114121	0.128622	0.132079	0.121779	0.110546	0.09899
495	453	446	669	653	0.554437	77347	2.40162	3.54434	0	71.907	900.442	0.764645	405.224	15.5236	0.0686621	0.018053	0.329085	0.000325912	403.229	15.5009	0.0676427	0.0180582	0.332324	0.000326099	0.46733	0.183975	0.172825	0.204113	0.216992	0.19625	0.176042	0.160604	0.202302	0.215899	0.178834	0.170293	0.219403	0.242107	0.233984	0.226	0.264227	0.242708	0.238258	0.225955	0.285253	0.244377	0.201371	0.20456	0.207587
562	779	850	1343	1034	0.508756	586651	1.50586	3.74947	-0.00211864	76.5887	804.372	0.760677	217.462	11.2826	0.0928127	0.0264699	0.327675	0.000700656	212.133	11.1401	0.093791	0.0265704	0.344109	0.000705984	0.284219	0.459717	0.07403	0.09209	0.088308	0.098942	0.112578	0.095196	0.096944	0.091717	0.07194	0.079806	0.112679	0.137188	0.137259	0.131021	0.134293	0.128616	0.113546	0.087393	0.108397	0.131646	0.119446	0.11846	0.092663
564	540	585	760	792	0.405615	150144	1.21141	3.6531	-0.0107527	81.9345	976.507	0.72173	1172.82	26.3718	0.0408483	0.0110101	0.334154	0.000121222	1178.18	26.4798	0.0407143	0.0109941	0.331374	0.00012087	0.522892	0.71951	0.070044	0.106355	0.121856	0.104408	0.090536	0.070979	0.08097	0.070163	0.068595	0.092753	0.133171	0.128703	0.12221	0.129978	0.144711	0.128193	0.109433	0.103397	0.128012	0.129136	0.092182	0.09434	0.093907
561	690	687	1001	1004	0.596425	379382	1.00692	3.6516	0.0102339	72.6978	825.42	0.784685	255.85	12.2433	0.0853116	0.0241606	0.361861	0.000583734	252.629	12.181	0.0858873	0.0242044	0.369785	0.000585854	0.147723	0.730335	0.114402	0.142776	0.144962	0.132567	0.107856	0.090322	0.109532	0.10617	0.09188	0.090473	0.126649	0.14057	0.14801	0.144799	0.137796	0.108133	0.098353	0.100815	0.135591	0.147141	0.127723	0.100319	0.09094
729	2520	2592	794	836	0.420308	179692	2.6221	3.61307	-0.00531915	71.4274	1100.93	0.751274	396.787	15.1331	0.0718354	0.0186505	0.436374	0.00034784	397.812	15.1341	0.0717812	0.0186605	0.435016	0.000348214	0.318435	0.971325	0.11855	0.140842	0.151577	0.157061	0.134764	0.094689	0.112132	0.141447	0.109411	0.088737	0.13223	0.162506	0.134397	0.108901	0.130498	0.13996	0.137347	0.141991	0.151851	0.154128	0.109364	0.099839	0.079763
485	419	573	738	809	0.401674	127244	1.49354	3.71224	-0.0122951	76.892	978.99	0.743288	770.29	21.3565	0.0499551	0.0132767	0.339157	0.000176271	761.376	21.2254	0.050421	0.0133121	0.346797	0.000177211	0.0934271	0.865493	0.135218	0.154259	0.149175	0.157464	0.12828	0.09732	0.138385	0.201	0.144534	0.120886	0.15825	0.185728	0.154592	0.173585	0.18844	0.175947	0.144641	0.167192	0.21829	0.231364	0.169571	0.175521	0.134586
522	424	442	682	636	0.598665	70544	1.20693	3.62791	0	57.9498	621.099	0.921524	1548.35	29.9408	0.0377559	0.00921984	0.356144	8.50055e-05	1526.74	29.7645	0.0383378	0.00922439	0.36519	8.50894e-05	0.287103	0.216368	0.182044	0.196892	0.171574	0.189122	0.203424	0.152124	0.188839	0.201329	0.150726	0.100081	0.179553	0.223462	0.21988	0.212183	0.200177	0.148013	0.142308	0.182871	0.240433	0.224511	0.178297	0.14843	0.139584
481	386	384	551	556	0.693758	44385	1.02944	3.65417	-0.0294118	75.3737	728.932	0.770508	2004.39	34.6881	0.0313667	0.0077963	0.396702	6.07822e-05	1998.49	34.6697	0.0306814	0.00780427	0.398367	6.09066e-05	0.86448	0.250701	0.246414	0.2676	0.248867	0.267058	0.261134	0.222329	0.23978	0.259745	0.198562	0.18145	0.207533	0.243479	0.239858	0.267038	0.2597	0.232399	0.236962	0.260465	0.287837	0.26319	0.243225	0.245796	0.228307
535	467	467	644	644	0.576845	78164.5	1.02919	3.81126	0.00333333	71.1969	895.683	0.776286	1157.8	26.2743	0.0413947	0.0107359	0.309709	0.000115259	1144.36	26.1493	0.0411579	0.0107536	0.317362	0.00011564	0.212831	0.873098	0.203015	0.232422	0.197998	0.210062	0.236503	0.199971	0.197793	0.185164	0.145578	0.129848	0.217969	0.24072	0.209788	0.181245	0.203276	0.20407	0.191521	0.187635	0.208569	0.21202	0.180545	0.164532	0.119739
490	409	413	686	679	0.553896	87154.5	1.04028	3.6806	-0.00900901	64.9023	797.261	0.832281	1466	29.364	0.0381227	0.00945409	0.358926	8.93799e-05	1444.83	29.1637	0.0383996	0.00946628	0.367984	8.96105e-05	0.245131	0.0618076	0.126417	0.116251	0.122138	0.178198	0.188924	0.120182	0.138986	0.177909	0.11204	0.058928	0.089192	0.113978	0.115183	0.134685	0.152802	0.113855	0.105764	0.139519	0.171654	0.172206	0.155048	0.136608	0.102628
496	447	453	625	625	0.629071	67280.5	1.00855	3.811	0.00346021	67.9919	764.3	0.818484	1695.64	31.6796	0.0347678	0.0086866	0.335781	7.5457e-05	1682.71	31.4863	0.0354298	0.00870925	0.340649	7.5851e-05	0.375109	0.300901	0.164536	0.171707	0.129251	0.117849	0.125112	0.111131	0.145748	0.156716	0.135393	0.132849	0.197392	0.217077	0.211622	0.232486	0.258343	0.213663	0.173353	0.185409	0.2565	0.23214	0.158714	0.145097	0.123863
711	2535	2566	724	705	0.561873	103240	1.8476	3.63743	0	60.5048	747.456	0.873049	1079.54	24.9321	0.0453272	0.0108982	0.43287	0.00011877	1071.11	24.8503	0.0456891	0.0109136	0.43734	0.000119107	0.756946	0.764466	0.070058	0.072092	0.080325	0.110849	0.098962	0.056394	0.055848	0.100099	0.110615	0.119534	0.139735	0.126488	0.087472	0.058206	0.105397	0.123785	0.137943	0.118353	0.145342	0.145119	0.102705	0.076084	0.065335
698	2547	2605	888	861	0.380565	193225	1.17692	3.52189	-0.00168919	70.9815	910.749	0.772436	232.675	11.3499	0.0947457	0.0255879	0.424105	0.000654741	224.608	11.3018	0.094604	0.0255873	0.444163	0.000654711	0.247513	0.58339	0.083895	0.102271	0.108813	0.095198	0.080712	0.07282	0.075449	0.087749	0.095487	0.097054	0.094925	0.095053	0.091963	0.082779	0.104315	0.117315	0.115694	0.096761	0.104055	0.111531	0.095739	0.0776	0.065803
559	779	849	1343	1032	0.501504	585102	1.50457	3.80456	0.00108814	76.2397	789.446	0.766191	169.476	9.95784	0.103917	0.0300038	0.331932	0.000900225	165.019	9.82181	0.105087	0.0301289	0.349489	0.000907751	0.220603	0.157371	0.111409	0.138747	0.134031	0.126181	0.149138	0.129434	0.119133	0.090065	0.091854	0.082877	0.128457	0.155092	0.169015	0.154421	0.144636	0.126896	0.128514	0.133211	0.148417	0.147411	0.129842	0.114456	0.105358
531	432	427	595	596	0.661605	65788	11.6131	3.62324	0.0141844	67.9552	744.151	0.830091	691.701	20.0684	0.0535124	0.0137398	0.497004	0.000188782	689.149	20.0759	0.0540075	0.0137466	0.498758	0.000188969	0.882713	0.0921142	0.185744	0.199784	0.190349	0.185549	0.168855	0.135777	0.130505	0.127314	0.070294	0.09079	0.167271	0.188915	0.147273	0.138493	0.19715	0.189402	0.182557	0.17445	0.219906	0.196404	0.15473	0.116094	0.106228
739	2530	2596	860	877	0.357277	216412	1.6417	3.64632	0.00313972	74.2802	1132.34	0.710643	116.066	8.10195	0.128028	0.0354105	0.446347	0.00125391	117.578	8.1491	0.12715	0.0353235	0.435754	0.00124775	0.805397	0.133469	0.156626	0.16508	0.178298	0.189319	0.180141	0.155517	0.156015	0.161281	0.154576	0.16722	0.177548	0.179158	0.143505	0.138422	0.153791	0.188314	0.175434	0.160507	0.172043	0.199357	0.176839	0.140159	0.133762
484	338	337	530	529	0.69399	34826.5	1.06227	3.79006	-0.00558659	76.0903	550.824	0.795515	858.479	22.5672	0.0470562	0.0113328	0.45245	0.000128432	859.688	22.5671	0.0477464	0.0113284	0.451008	0.000128333	0.109088	0.277886	0.140728	0.167553	0.165092	0.194549	0.183762	0.148331	0.110954	0.099491	0.089307	0.138471	0.221767	0.213199	0.162589	0.153888	0.19084	0.17491	0.148706	0.1914	0.219024	0.196323	0.138585	0.17686	0.14798
478	359	363	555	558	0.672909	44510.5	1.02428	3.46701	0	72.9553	644.817	0.802754	1221.54	26.8734	0.0408184	0.00981753	0.409425	9.63839e-05	1244.65	27.082	0.040486	0.0097991	0.398603	9.60224e-05	0.280477	0.572545	0.152499	0.195765	0.191638	0.210724	0.190904	0.129115	0.145973	0.177531	0.142009	0.126497	0.199783	0.228237	0.182642	0.168336	0.211563	0.201341	0.161793	0.160822	0.201351	0.206757	0.153481	0.154248	0.116116
475	346	346	529	528	0.665818	37747.5	1.02943	3.723	-0.00473934	79.163	670.113	0.748023	585.604	18.5271	0.05833	0.0139801	0.419864	0.000195442	573.388	18.3725	0.0581806	0.0140048	0.431447	0.000196135	0.423518	0.188477	0.134251	0.185786	0.187397	0.195528	0.159038	0.138247	0.152432	0.176655	0.140972	0.141056	0.175144	0.192551	0.183195	0.169261	0.166721	0.156675	0.155163	0.152522	0.191423	0.189277	0.167097	0.170275	0.160762
0	1051	1090	1566	1525	0.158344	1044236	1.02618	3.69227	0.00104603	64.1701	201.635	1.25599	767.923	21.5184	0.0480158	0.0145187	0.188529	0.000210794	761.047	21.4169	0.0484319	0.0145371	0.195535	0.000211327	0.242962	0.490575	0.099481	0.103026	0.103594	0.10334	0.10319	0.093415	0.079446	0.062334	0.101152	0.171387	0.238868	0.239952	0.169	0.126621	0.139962	0.151244	0.111571	0.095259	0.109363	0.145592	0.116978	0.071596	0.06074
1	636	633	1170	1207	0.190914	354150	1.05969	3.75619	0.0019084	59.6887	156.23	1.93476	1131.81	26.2236	0.0395833	0.0121207	0.141525	0.000146913	1105.16	25.8916	0.0401393	0.0121587	0.161	0.000147834	0.465148	0.253557	0.150008	0.157544	0.150398	0.185996	0.230422	0.178416	0.144337	0.117125	0.132993	0.136076	0.158844	0.176265	0.177963	0.162319	0.134396	0.12854	0.148239	0.15753	0.136497	0.101977	0.058876	0.055169	0.09098
2	1126	1106	1423	1429	0.0986652	730284	5.51863	3.72858	0.000495786	75.6042	121.991	1.2157	679.636	20.4668	0.0492618	0.0153524	0.128627	0.000235696	670.394	20.316	0.0497174	0.0153783	0.140145	0.000236491	0.434986	0.540838	0.123949	0.132385	0.149441	0.176698	0.213697	0.182191	0.133725	0.105069	0.122831	0.180441	0.257378	0.290545	0.19977	0.187452	0.192117	0.207792	0.15247	0.143297	0.182537	0.233424	0.142568	0.08627	0.097883
3	442	470	1558	995	0.148433	622657	1.5502	3.40476	-0.00216763	72.295	191.464	1.08247	411.876	15.8634	0.0635975	0.0197661	0.154214	0.0003907	408.506	15.7933	0.0637941	0.019782	0.161073	0.000391329	0.402787	0.127207	0.103475	0.110661	0.091783	0.105329	0.169901	0.163613	0.138613	0.100316	0.096932	0.149966	0.22978	0.257458	0.197351	0.213539	0.206361	0.172859	0.155921	0.216463	0.271201	0.238755	0.115256	0.055812	0.072809
4	1256	1218	1999	1765	0.0937998	1.91238e+06	3.4235	3.73608	0.000592768	81.4971	224.022	0.898459	319.377	13.968	0.0716861	0.0223326	0.155389	0.000498745	315.91	13.897	0.0719551	0.0223608	0.164265	0.000500005	0.12184	0.16355	0.22674	0.230862	0.198668	0.257167	0.317097	0.223427	0.159661	0.191241	0.21852	0.197306	0.187038	0.174921	0.154438	0.18243	0.203534	0.171034	0.10358	0.152592	0.240172	0.279627	0.199045	0.158298	0.182733
5	619	605	955	992	0.208722	253048	1	3.77053	0.0011274	61.6165	221.101	1.53071	1498.3	30.2145	0.0337676	0.0104873	0.146892	0.000109984	1482.82	30.0622	0.0344197	0.0105024	0.15496	0.000110301	0.525712	0.817644	0.123641	0.142992	0.154064	0.174921	0.172259	0.128237	0.08523	0.062717	0.073633	0.094276	0.124434	0.177881	0.138722	0.153544	0.128174	0.143577	0.109057	0.143469	0.14794	0.136184	0.059358	0	0.055856
6	1190	1355	2194	2539	0.529492	3250160	1.17437	3.56199	-0.00136861	59.577	246.879	0.956082	131.214	8.36623	0.127432	0.0382738	0.521214	0.00146489	129.32	8.31878	0.128071	0.038331	0.528049	0.00146927	0.446248	0.0274294	0.093223	0.102087	0.113445	0.132008	0.135503	0.07949	0.035805	0.063501	0.111282	0.163047	0.179052	0.18147	0.153372	0.145446	0.111506	0.063891	0.046576	0.073966	0.090167	0.086332	0.06356	0.05875	0.072859
7	1781	1830	2445	2744	0.381136	4.18311e+06	1.11091	3.58141	0.000366166	98.5188	187.227	0.729168	111.486	8.15896	0.120041	0.0379414	0.238778	0.00143955	110.453	8.12443	0.120475	0.0379767	0.245849	0.00144223	0.663393	0.916014	0.066056	0.090333	0.113495	0.156608	0.154606	0.106474	0.033771	0.04754	0.092965	0.122328	0.109787	0.112678	0.120873	0.127477	0.098446	0.062964	0.060427	0.106396	0.136863	0.129135	0.070399	0.05812	0.098666
8	1922	2148	3021	2555	0.337819	4691419	2.65519	3.62892	0.0015868	63.4903	670.479	0.816672	123.829	8.4016	0.124313	0.0360099	0.371509	0.00129671	122.006	8.35182	0.124821	0.0360719	0.380758	0.00130118	0.549413	0.338188	0.098961	0.116376	0.115085	0.116999	0.111244	0.077984	0.066213	0.077417	0.110596	0.121394	0.128084	0.134458	0.105326	0.104702	0.100712	0.110596	0.110023	0.135044	0.139721	0.101889	0.042274	0.028477	0.0482
126	266	247	553	553	0.591081	46315	1.87828	3.56757	-0.00389105	87.3491	604.074	0.712879	1514.1	30.1258	0.0357313	0.00899766	0.356556	8.09579e-05	1513.8	30.1533	0.0355459	0.00899358	0.356114	8.08845e-05	0.880607	0.406818	0.088626	0.09971	0.11643	0.15211	0.130704	0.094477	0.082699	0.110107	0.129749	0.152828	0.167363	0.186538	0.160367	0.145367	0.119866	0.163966	0.137311	0.168843	0.164041	0.180585	0.066809	0.072743	0.103799
416	329	330	524	529	0.632105	36641.5	2.25041	3.56332	-0.0396476	88.2868	677.901	0.689437	1729.09	32.2613	0.0321843	0.00840324	0.391244	7.06145e-05	1729.89	32.2323	0.0329918	0.00841507	0.390604	7.08135e-05	0.209334	0.17566	0.097581	0.100934	0.090205	0.073449	0.067239	0.063991	0.065567	0.07248	0.080681	0.074269	0.079557	0.101428	0.120083	0.118589	0.125471	0.12503	0.117598	0.097306	0.100384	0.098123	0.103683	0.068201	0.0477
386	367	364	520	529	0.675869	37376.5	1.15041	3.78392	-0.0101523	80.3764	586.898	0.74892	1702.54	31.997	0.0335907	0.00848843	0.423308	7.20535e-05	1706.45	32.013	0.0327421	0.00849549	0.42147	7.21733e-05	0.440462	0.936666	0.10855	0.107897	0.086436	0.086154	0.086753	0.087004	0.106215	0.118393	0.090617	0.057252	0.084775	0.115388	0.12633	0.111421	0.113303	0.090005	0.100459	0.116868	0.118046	0.081781	0.067472	0.06972	0.076388
155	379	379	546	525	0.600221	40193	1.30969	3.37131	0	93.4628	666.585	0.782475	1814.67	33.0413	0.0318807	0.00831894	0.388284	6.92048e-05	1784.69	32.7825	0.0321293	0.00835078	0.39842	6.97356e-05	0.952603	0.866853	0.164956	0.239309	0.291709	0.36846	0.337503	0.238535	0.25737	0.329455	0.335082	0.278341	0.303067	0.300779	0.304594	0.341075	0.315582	0.301389	0.250132	0.31467	0.309437	0.369952	0.276752	0.302549	0.329698
144	331	330	457	456	0.571632	22719.5	1.36075	3.17877	0.0169492	123.818	279.895	0.0595964	1917.32	34.5035	0.0289692	0.00885936	0.222986	7.84882e-05	1848.81	33.9368	0.0294198	0.00888949	0.250618	7.90231e-05	0.944778	0.115151	0.366414	0.384882	0.402693	0.433412	0.416614	0.36822	0.35996	0.432708	0.4536	0.457119	0.4874	0.511107	0.490899	0.455857	0.425976	0.42714	0.42034	0.464484	0.455797	0.449254	0.337757	0.39478	0.505046
401	445	444	724	728	0.561487	125064	1.04534	3.41748	0.00243902	69.7007	597.192	0.844931	522.304	17.2889	0.0634289	0.0161735	0.478047	0.000261583	522.153	17.3185	0.0630088	0.0161683	0.478337	0.000261415	0.476027	0.0245106	0.14567	0.141729	0.124056	0.11144	0.125257	0.117053	0.116528	0.114388	0.105787	0.085354	0.076311	0.082373	0.112807	0.142325	0.175285	0.149857	0.127962	0.117882	0.130044	0.099405	0.083186	0.070229	0.072731
385	320	310	462	476	0.657328	20902	1.15359	3.60112	0.0340909	100.596	520.403	0.530763	1045.42	25.2898	0.0405046	0.0106953	0.365978	0.00011439	1113.15	25.9481	0.0402832	0.0106633	0.324612	0.000113705	0.770169	0.218931	0.084962	0.096786	0.105273	0.119895	0.114114	0.10173	0.095374	0.125914	0.11729	0.07579	0.081938	0.122142	0.134043	0.10917	0.107327	0.111073	0.098999	0.12261	0.121884	0.11878	0.064445	0.053037	0.062774
430	363	366	502	501	0.615093	29503.5	2.80101	3.63529	-0.0119048	90.4023	514.633	0.666294	1772.38	32.7879	0.0318738	0.00832185	0.370282	6.92531e-05	1827.8	33.2646	0.0318793	0.00828673	0.349861	6.86699e-05	0.103521	0.267234	0.14916	0.170378	0.166946	0.173599	0.159143	0.156612	0.148036	0.162846	0.161218	0.152338	0.130495	0.120515	0.133211	0.152932	0.187604	0.188064	0.187637	0.185052	0.189288	0.165799	0.165188	0.141795	0.120714
419	351	349	511	516	0.605159	35392.5	1.17504	3.60526	0	94.9081	732.254	0.565996	1077.41	25.4819	0.0414698	0.0105979	0.414908	0.000112315	1083.89	25.5538	0.0410547	0.0105899	0.411161	0.000112146	0.668073	0.231778	0.089169	0.118794	0.113671	0.099051	0.103697	0.10506	0.110826	0.126719	0.115018	0.103808	0.09589	0.097936	0.093137	0.090578	0.088841	0.084692	0.091403	0.102849	0.112451	0.100778	0.068851	0.049128	0.053795
162	433	430	649	643	0.55658	88700	1.14137	3.72	-0.00928793	82.8047	779.919	0.689831	565.911	18.344	0.0569917	0.0152993	0.363894	0.000234067	563.328	18.3372	0.0570891	0.0153082	0.366699	0.000234342	0.163338	0.82456	0.143255	0.148429	0.212143	0.243446	0.183019	0.120249	0.141634	0.206517	0.227764	0.237427	0.229707	0.236489	0.253824	0.267466	0.264034	0.218577	0.182318	0.259717	0.315218	0.352388	0.19179	0.225894	0.305599
145	329	319	751	750	0.375204	139756	1.13614	4.14214	0	73.8463	556.128	0.822824	1046.18	24.5236	0.045045	0.0116146	0.438931	0.0001349	1025.72	24.3992	0.0446421	0.0116075	0.450279	0.000134734	0.621328	0.100919	0.0923	0.121555	0.117493	0.118578	0.120982	0.092913	0.107331	0.115635	0.123972	0.107218	0.143851	0.144682	0.132673	0.131135	0.138358	0.131604	0.12022	0.142492	0.136053	0.11007	0.067347	0.080949	0.103407
104	324	326	497	498	0.607859	28649	1.81906	3.60638	-0.016129	97.0307	575.048	0.54501	1508.03	30.3411	0.0336029	0.00921549	0.318055	8.49253e-05	1534.97	30.5256	0.0352972	0.00919708	0.305155	8.45863e-05	0.959939	0.937805	0.241264	0.259353	0.246888	0.176728	0.132702	0.166152	0.204604	0.247289	0.214182	0.226513	0.222782	0.240035	0.197775	0.231857	0.268878	0.280309	0.258071	0.288925	0.281688	0.302604	0.225707	0.278976	0.345489
118	337	334	473	468	0.633668	21747.5	1.62264	3.59659	-0.0402299	106.471	523.998	0.41991	2044.92	35.605	0.0286623	0.00822278	0.260891	6.76142e-05	2026.13	35.3689	0.0290064	0.00825061	0.26676	6.80726e-05	0.298579	0.0132519	0.091025	0.109732	0.126424	0.147918	0.13567	0.106176	0.100665	0.118002	0.126551	0.129596	0.137818	0.131398	0.131374	0.14479	0.136335	0.132706	0.117949	0.15161	0.136134	0.138192	0.084476	0.097391	0.109395
400	436	430	645	631	0.558764	86191	1.55758	3.64943	-0.00289017	78.9412	813.698	0.722836	500.742	17.2013	0.0612582	0.0161745	0.399359	0.000261615	493.964	17.0902	0.0625879	0.0162082	0.407491	0.000262706	0.774136	0.158512	0.056787	0.083553	0.081507	0.096085	0.095654	0.1105	0.100729	0.11053	0.105488	0.100932	0.104318	0.098879	0.095717	0.088414	0.10544	0.115534	0.125879	0.123545	0.116716	0.107544	0.089851	0.089738	0.083394
136	285	281	436	443	0.653436	14293.5	1.31168	3.75758	-0.0615385	105.821	377.957	0.428446	2308.03	37.7598	0.0266298	0.00779476	0.372532	6.07583e-05	2417.28	38.4812	0.0270593	0.0077765	0.340239	6.0474e-05	0.461138	0.8252	0.175763	0.180132	0.166191	0.152566	0.133129	0.123926	0.198317	0.210656	0.226755	0.239968	0.336936	0.318259	0.267732	0.263405	0.268601	0.274045	0.246194	0.249098	0.202294	0.232377	0.203847	0.273305	0.324135
399	366	361	587	586	0.593562	61111.5	1.12291	3.66914	0	84.9613	789.467	0.668941	314.612	13.6484	0.0752372	0.0201889	0.405731	0.000407593	315.107	13.6714	0.0752506	0.0201791	0.404523	0.000407195	0.338377	0.611781	0.07877	0.083626	0.082323	0.082149	0.07831	0.094048	0.110689	0.113368	0.095923	0.07419	0.08365	0.093755	0.098126	0.077098	0.073398	0.063393	0.066634	0.116263	0.131798	0.120317	0.111582	0.112756	0.10024
119	104	205	516	509	0.503209	30690	2.67071	3.28495	0.0326087	97.1874	419.438	0.579537	1712.5	32.2668	0.0325284	0.00861074	0.367176	7.41448e-05	1863.4	33.6213	0.030766	0.00852013	0.310132	7.25926e-05	0.941807	0.74962	0.259095	0.291996	0.269364	0.33636	0.306299	0.196791	0.143736	0.228408	0.28769	0.318353	0.333818	0.262122	0.202392	0.231917	0.277356	0.250916	0.234747	0.246326	0.255416	0.296071	0.244463	0.293408	0.35812
425	354	358	533	512	0.662198	34140	1.45428	3.53731	0.00502513	75.0065	463.964	0.832425	1885.29	33.5217	0.0325876	0.00801817	0.443208	6.42911e-05	1839.95	33.1554	0.0320792	0.00804639	0.455746	6.47444e-05	0.196084	0.22888	0.107612	0.092794	0.092347	0.10214	0.108296	0.106993	0.101858	0.098663	0.098515	0.09791	0.097131	0.092969	0.10264	0.121521	0.157721	0.143926	0.128233	0.121074	0.152064	0.146481	0.145992	0.119758	0.106203
110	287	286	446	445	0.639222	15371	1.0586	3.34454	0	107.226	402.2	0.404073	2598.58	40.1021	0.0255422	0.00750264	0.321828	5.62896e-05	2643.26	40.3417	0.0256471	0.0075147	0.307294	5.64707e-05	0.376677	0.321083	0.215297	0.232745	0.222978	0.229874	0.203842	0.131832	0.110481	0.192836	0.222702	0.220795	0.203613	0.154943	0.163584	0.222985	0.228112	0.227282	0.248451	0.309122	0.298411	0.292127	0.173505	0.218407	0.315499
140	152	161	517	442	0.469686	21924.5	1.74427	4.16766	0	116.781	432.684	0.261215	986.435	24.53	0.0422675	0.0114916	0.342198	0.000132058	923.287	23.7103	0.0438036	0.0116043	0.384211	0.00013466	0.658768	0.394075	0.318449	0.300014	0.302626	0.329706	0.317189	0.225854	0.19133	0.292446	0.316124	0.331383	0.315784	0.309106	0.25362	0.251382	0.268379	0.313654	0.273852	0.26516	0.279611	0.312418	0.225306	0.228819	0.307245
111	280	286	434	439	0.59411	17239	1.05201	3.67568	-0.0136986	132.726	267.078	0.000174024	1778.14	33.2236	0.0307107	0.00936432	0.201623	8.76906e-05	1761.11	33.0913	0.0309091	0.00937423	0.208197	8.78762e-05	0.103884	0.360188	0.19168	0.192036	0.214492	0.239356	0.205723	0.125771	0.157775	0.22657	0.2427	0.216694	0.223064	0.221535	0.229057	0.2615	0.228543	0.19252	0.159054	0.234221	0.258369	0.247108	0.128364	0.174126	0.269531
403	382	379	544	553	0.605407	45800.5	1.08524	3.56274	0	90.1741	794.152	0.648967	875.906	23.0041	0.0446608	0.0116894	0.404089	0.000136643	889.32	23.1138	0.0451013	0.0116782	0.394765	0.00013638	0.995782	0.650948	0.089508	0.096328	0.087433	0.096605	0.085892	0.079488	0.072633	0.080065	0.094873	0.100841	0.114277	0.091279	0.112474	0.128516	0.150172	0.12975	0.119875	0.12475	0.11548	0.123953	0.101351	0.084261	0.060428
409	391	384	587	596	0.623515	63433.5	3.95987	3.62676	0.0035461	83.1849	785.494	0.692852	518.253	17.5315	0.0602121	0.0155115	0.441921	0.000240608	513.156	17.4719	0.0593527	0.0155309	0.447401	0.000241209	0.727043	0.383583	0.07037	0.088874	0.086182	0.098706	0.094338	0.088629	0.075903	0.082319	0.08586	0.082124	0.082775	0.095722	0.113827	0.111298	0.103329	0.09641	0.095789	0.09811	0.101552	0.087799	0.066069	0.076249	0.095518
382	352	355	538	542	0.66088	39269.5	1.64945	3.59361	-0.0368664	77.6232	521.156	0.784477	1291.36	27.6468	0.0385888	0.00963471	0.404309	9.28277e-05	1279.61	27.5624	0.0386503	0.00965325	0.409348	9.31852e-05	0.368053	0.0747682	0.091986	0.115464	0.132638	0.130607	0.10909	0.093645	0.098897	0.109839	0.113262	0.083306	0.101874	0.106038	0.116173	0.127012	0.179136	0.156036	0.122256	0.122614	0.126303	0.121585	0.117337	0.106683	0.081453
458	733	749	1193	1226	0.575973	649848	1.85161	3.64465	0.00114155	56.3236	488.767	0.934218	94.471	7.22253	0.146441	0.0421648	0.375222	0.00177787	94.0206	7.21531	0.146757	0.0421869	0.378064	0.00177974	0.205838	0.571147	0.094407	0.084168	0.104309	0.143438	0.15227	0.138498	0.14834	0.186216	0.186331	0.152881	0.152661	0.146314	0.116483	0.069526	0.071478	0.077837	0.079326	0.077246	0.07005	0.077471	0.083046	0.087776	0.08709
455	987	985	1454	1436	0.555146	989810	1.02556	3.67535	0	49.1294	490.518	0.944282	184.54	10.0305	0.112187	0.0303171	0.447905	0.000919129	183.023	9.99066	0.112621	0.0303602	0.452478	0.000921741	0.544813	0.16243	0.127467	0.130259	0.148487	0.190704	0.186115	0.155824	0.159067	0.17069	0.164341	0.128963	0.13949	0.132451	0.149964	0.141602	0.193094	0.20132	0.162557	0.17158	0.194582	0.16643	0.080625	0.058912	0.058812
461	754	743	1324	1341	0.555332	791628	14.2254	3.55556	0.00202429	54.0317	346.671	0.988076	90.4047	6.29305	0.174177	0.0532001	0.697686	0.00283025	110.892	6.46227	0.174914	0.0532438	0.629268	0.0028349	0.22358	0.570231	0.157302	0.186129	0.232293	0.244464	0.23057	0.210023	0.212146	0.236363	0.23977	0.193187	0.190113	0.185741	0.212532	0.210399	0.238196	0.205447	0.162175	0.193373	0.21999	0.237331	0.183473	0.135586	0.088278
323	1060	1050	1471	1543	0.485289	1098700	1.39242	3.63158	0	53.1444	560.529	1.06042	185.851	10.2062	0.107596	0.029688	0.353612	0.00088138	186.775	10.2337	0.107219	0.0296639	0.350279	0.000879949	0.209592	0.147145	0.090018	0.118396	0.148308	0.172011	0.169744	0.147403	0.119547	0.118046	0.125919	0.137744	0.153668	0.152072	0.142336	0.137203	0.169743	0.132499	0.139448	0.213163	0.272552	0.188354	0.054562	0.066374	0.116527
439	787	786	1192	1192	0.525648	603454	1.23629	3.64706	0.00764192	59.2976	643.004	0.914491	668.795	19.5957	0.05705	0.0152206	0.3167	0.000231667	668.775	19.5833	0.0571602	0.015227	0.316698	0.000231861	0.754518	0.125261	0.185436	0.224008	0.227505	0.203263	0.186632	0.173427	0.211561	0.234895	0.217884	0.163566	0.169979	0.141826	0.156579	0.149439	0.173393	0.119328	0.10548	0.147845	0.185587	0.14413	0.090937	0.081623	0.097887
446	559	792	1334	1470	0.357566	901026	1.17621	3.60088	0	52.4173	401.934	0.971734	224.408	11.1231	0.0986916	0.0281736	0.39268	0.000793753	225.635	11.1133	0.0998135	0.0282265	0.389036	0.000796733	0.113509	0.930348	0.202139	0.200723	0.240981	0.291236	0.277688	0.222772	0.240442	0.289882	0.292967	0.239569	0.230296	0.242041	0.261584	0.244241	0.229482	0.204536	0.219027	0.285139	0.335446	0.279131	0.201038	0.144274	0.170567
432	1017	1012	1400	1427	0.449422	916703	1	3.57309	-0.00499168	53.6902	532.977	0.998057	160.269	9.24861	0.117985	0.0329045	0.714236	0.00108271	165.871	9.36246	0.117812	0.0329205	0.704139	0.00108376	0.501324	0.944732	0.254374	0.249376	0.285205	0.285312	0.284576	0.265262	0.285972	0.308826	0.277949	0.235945	0.22431	0.242505	0.250016	0.23718	0.23748	0.239976	0.247185	0.263089	0.292231	0.295238	0.241365	0.187582	0.172736
447	686	674	1145	1170	0.585855	531308	1.20567	3.70412	0.00125156	55.3116	395.261	0.961236	478.246	16.2008	0.0704371	0.0192841	0.387121	0.000371878	473.448	16.1202	0.0707356	0.0193153	0.393518	0.00037308	0.775365	0.161829	0.146175	0.20761	0.212009	0.188679	0.171762	0.192616	0.22098	0.238183	0.208216	0.155006	0.144989	0.151069	0.172873	0.181199	0.233791	0.214738	0.170688	0.142348	0.17831	0.18985	0.159155	0.123143	0.121801
314	1144	1141	1608	1593	0.401727	1.2741e+06	1.03131	3.73135	-0.000725163	51.6675	557.836	0.923586	247.04	11.8479	0.0926881	0.0254374	0.327974	0.000647062	244.759	11.7888	0.0931309	0.0254784	0.334122	0.000649149	0.278687	0.218261	0.041451	0.09758	0.156391	0.166046	0.119444	0.132805	0.144557	0.173796	0.130054	0.129395	0.136286	0.15963	0.136643	0.100264	0.091938	0.053784	0.071909	0.116783	0.162515	0.122922	0.064861	0.044752	0.058489
445	632	621	1021	999	0.527865	376652	1.08097	3.63462	0.00445104	63.8686	559.621	0.885548	705.531	20.2637	0.0544624	0.0147212	0.28549	0.000216714	705.479	20.2497	0.0545178	0.0147289	0.285371	0.00021694	0.754392	0.439606	0.195989	0.221502	0.200552	0.18186	0.199783	0.174876	0.17235	0.189102	0.188511	0.153771	0.165929	0.16166	0.193748	0.249615	0.328823	0.237333	0.179122	0.203468	0.243259	0.195649	0.156761	0.157907	0.108832
324	702	630	1561	1705	0.481243	904698	1.11872	3.49483	-0.00690846	53.4633	487.155	1.18138	226.592	11.1331	0.1	0.0279198	0.409866	0.000779513	231.41	11.2459	0.0991387	0.0278209	0.397426	0.000774002	0.251777	0.159546	0.068269	0.10447	0.146553	0.162521	0.156491	0.135876	0.135338	0.148017	0.144942	0.145696	0.152934	0.135118	0.108885	0.151827	0.196584	0.134184	0.086036	0.124009	0.204732	0.129025	0.069831	0.059738	0.101938
319	1139	1145	1650	1618	0.380926	1293406	1.02612	3.61306	0.00206469	50.6644	562.652	0.925054	195.714	10.5326	0.103594	0.0286899	0.328921	0.00082311	192.644	10.4615	0.104084	0.0287503	0.339706	0.00082658	0.338582	0.895423	0.066597	0.122032	0.161704	0.171636	0.140533	0.147282	0.139619	0.173011	0.14898	0.140401	0.153703	0.132017	0.102468	0.140066	0.198521	0.105545	0.05808	0.13747	0.230929	0.13948	0.0623	0.034168	0.078887
464	862	868	1397	1382	0.550674	905770	1.00997	3.58243	0.000907441	52.5052	498.942	0.936637	451.636	15.7493	0.0732127	0.0195652	0.398013	0.000382798	446.943	15.6777	0.0737309	0.0195914	0.404186	0.000383823	0.827655	0.653172	0.219363	0.258387	0.246529	0.218064	0.219866	0.202045	0.211302	0.250572	0.226573	0.158263	0.144412	0.204135	0.213743	0.177928	0.186564	0.181123	0.186733	0.198353	0.214359	0.2034	0.165632	0.111805	0.095162
317	1172	1161	1601	1626	0.410513	1274002	20.123	3.65554	-0.000711238	51.1857	525.774	0.94001	131.528	8.38404	0.128536	0.0365243	0.440516	0.00133402	130.386	8.35231	0.129119	0.0365757	0.445602	0.00133778	0.694315	0.633436	0.074552	0.101043	0.132147	0.15615	0.158137	0.14589	0.132793	0.151195	0.165593	0.151923	0.154097	0.138939	0.13827	0.159918	0.19917	0.101276	0.048709	0.087991	0.179739	0.139213	0.064366	0.042107	0.065185
462	854	856	1397	1379	0.573511	905600	1.01149	3.61314	0.000914077	52.0256	488.289	0.939145	214.157	10.8337	0.103625	0.0283167	0.401477	0.000801833	212.807	10.8032	0.103771	0.028335	0.405113	0.000802872	0.225924	0.868957	0.165774	0.164243	0.200067	0.228379	0.219669	0.218111	0.243445	0.248726	0.192113	0.16608	0.18081	0.188108	0.183685	0.19342	0.232337	0.227492	0.19389	0.163124	0.168501	0.202118	0.186316	0.172957	0.129563
315	1064	1023	2004	1691	0.290678	1634918	1.22768	3.85499	0.00180723	51.7699	539.398	0.929665	378.758	14.4567	0.0784445	0.0215487	0.393207	0.000464348	373.508	14.3476	0.0791075	0.0216107	0.401408	0.000467023	0.0699822	0.0746513	0.083496	0.151903	0.180377	0.183807	0.15798	0.18105	0.160594	0.172857	0.123468	0.148691	0.177377	0.179893	0.134383	0.189808	0.228314	0.158645	0.074906	0.100759	0.168957	0.155877	0.096983	0.07388	0.099426
451	718	733	1059	1120	0.540463	465190	1.67797	3.6995	0	61.2082	533.518	0.905377	410.531	15.2179	0.0734758	0.0200455	0.327341	0.000401821	404.297	15.1066	0.0739365	0.0200969	0.337725	0.000403886	0.624964	0.190621	0.163823	0.23808	0.230284	0.187151	0.134162	0.1321	0.153175	0.212095	0.204335	0.137192	0.128203	0.152505	0.198424	0.205408	0.255495	0.214285	0.167283	0.159033	0.183976	0.183248	0.122112	0.1098	0.102142
448	959	894	1532	1111	0.474194	733692	1.066	3.90687	0	55.8638	468.09	1.00983	124.284	8.31979	0.127876	0.0364802	0.379677	0.00133081	122.164	8.26323	0.12802	0.0365445	0.390108	0.0013355	0.585902	0.720008	0.178693	0.239755	0.250662	0.269104	0.232721	0.244175	0.263451	0.291491	0.23539	0.185238	0.199661	0.215887	0.225856	0.197343	0.198806	0.163255	0.149978	0.198324	0.252905	0.26155	0.185791	0.130434	0.10449
434	758	745	1078	1112	0.566161	483687	1.17136	3.60494	0.00123762	65.3916	656.408	0.976979	150.194	9.29718	0.11244	0.0319417	0.3393	0.00102027	154.596	9.40427	0.112037	0.0318444	0.320061	0.00101406	0.75606	0.870042	0.143664	0.150393	0.167194	0.194078	0.205113	0.204364	0.236713	0.268916	0.265214	0.182089	0.19191	0.180248	0.223514	0.22517	0.308589	0.263827	0.212918	0.186638	0.218178	0.227275	0.185399	0.137746	0.096863
463	866	868	1395	1381	0.572175	908051	1.01072	3.67575	0.00097561	52.8012	511.632	0.933794	338.808	13.6513	0.0836937	0.0225029	0.397475	0.00050638	336.966	13.6136	0.0839269	0.0225256	0.400636	0.000507404	0.851819	0.42152	0.162388	0.153498	0.143323	0.148805	0.145895	0.156021	0.185912	0.221539	0.2193	0.17314	0.184903	0.201742	0.217769	0.188142	0.199439	0.17534	0.160594	0.154248	0.160007	0.141669	0.118717	0.099368	0.105995
326	757	763	1541	1298	0.412063	879558	1.14496	4.15146	0	58.3293	541.188	0.94052	365.673	14.2784	0.0782888	0.0216891	0.335577	0.000470415	355.246	14.134	0.0783078	0.0217292	0.354552	0.000472158	0.768959	0.376538	0.170135	0.230452	0.333305	0.349027	0.303256	0.250779	0.239754	0.257251	0.227194	0.245346	0.249928	0.214816	0.192331	0.204446	0.244908	0.179233	0.138868	0.162802	0.298949	0.283779	0.169479	0.128072	0.17347
320	1025	1029	1607	1614	0.436206	1261617	1.01245	3.66593	-0.00294768	48.2652	469.291	0.945988	191.236	10.2887	0.10783	0.0296919	0.374583	0.000881607	188.73	10.2309	0.108266	0.0297401	0.382694	0.000884476	0.563628	0.977269	0.07867	0.118033	0.16456	0.172881	0.165316	0.164494	0.146394	0.143858	0.138749	0.138847	0.157135	0.151045	0.148368	0.198969	0.224052	0.147316	0.092661	0.168602	0.266773	0.182373	0.063625	0.031487	0.092717
327	736	654	1609	1773	0.466903	1026273	1.13908	3.69164	-0.00631912	53.115	479.038	1.1794	564.039	17.5349	0.0651518	0.0180222	0.391285	0.0003248	566.353	17.5939	0.0649308	0.0179866	0.388792	0.000323517	0.618762	0.55946	0.058322	0.097851	0.147743	0.123538	0.12696	0.105276	0.089679	0.093909	0.117485	0.127787	0.120703	0.131638	0.12646	0.162922	0.203224	0.13075	0.040135	0.101769	0.202911	0.143741	0.050773	0.047838	0.071196
441	695	709	1172	1178	0.498447	578980	1.04811	3.73829	0.00687285	58.373	612.781	0.918083	387.972	14.9557	0.0732175	0.0199767	0.296399	0.000399067	384.941	14.8853	0.0738374	0.0200043	0.301792	0.000400171	0.385271	0.235292	0.072882	0.098052	0.099618	0.083452	0.075138	0.083379	0.093997	0.094471	0.075455	0.054977	0.057314	0.078909	0.087451	0.085446	0.107605	0.104887	0.088517	0.076217	0.091579	0.082087	0.072184	0.062236	0.055856
817	192	345	370	369	0.237151	7387.5	1.56611	3.44538	0.042735	185.127	45.324	0	2502.09	39.4773	0.0256659	0.00938586	0.0744516	8.80943e-05	2447.18	38.9762	0.0253932	0.0093975	0.094589	8.83131e-05	0.265096	0.712214	0.22814	0.229989	0.229097	0.243728	0.190452	0.179621	0.225861	0.28288	0.229332	0.224675	0.248003	0.240664	0.221302	0.261294	0.301526	0.281533	0.180668	0.230811	0.322065	0.364941	0.273563	0.266271	0.285559
818	251	249	383	381	0.49353	5736	1.16637	3.57333	0.0958904	173.175	64.1661	0	1084.56	25.7927	0.0391581	0.012693	0.204037	0.000161111	1106.97	25.9555	0.03939	0.0126738	0.187744	0.000160626	0.127388	0.927755	0.339994	0.324513	0.285096	0.292295	0.234196	0.203378	0.269713	0.330745	0.280281	0.296024	0.337642	0.32913	0.26524	0.303113	0.403727	0.381088	0.236034	0.246919	0.395353	0.432993	0.357423	0.282359	0.299119
819	337	360	368	387	0.654509	4307.5	3.1407	3.53425	0.0140845	156.26	186.726	0	1650.62	31.6792	0.031354	0.0101909	0.478177	0.000103854	1686.21	31.9671	0.0328346	0.010217	0.467425	0.000104387	0.987936	0.427176	0.165858	0.229041	0.216837	0.246806	0.190599	0.192946	0.261897	0.308741	0.239717	0.218871	0.292609	0.267995	0.201485	0.165807	0.253199	0.288944	0.211582	0.197445	0.276386	0.339924	0.299056	0.296787	0.317102
820	238	243	396	386	0.541313	6192	1.29379	3.64486	0.00952381	157.027	107.018	0	2036.41	35.2527	0.030932	0.00987284	0.213135	9.74729e-05	1939.28	34.5282	0.0306753	0.00992166	0.249063	9.84394e-05	0.835343	0.64729	0.249253	0.241823	0.251112	0.250389	0.21204	0.196503	0.251855	0.293941	0.256776	0.237592	0.22058	0.24194	0.243774	0.300076	0.344591	0.291566	0.1452	0.144463	0.266645	0.302645	0.261173	0.245446	0.288881
821	244	245	383	381	0.522579	5476.5	1	3.49231	0.015873	164.86	96.7743	0	1961.31	34.7253	0.0297036	0.00977548	0.182656	9.55601e-05	1887.66	34.1295	0.030394	0.00982619	0.212739	9.65539e-05	0.899392	0.544298	0.220673	0.206732	0.216214	0.274095	0.245588	0.232672	0.280514	0.330129	0.284979	0.285283	0.2603	0.241504	0.22878	0.30196	0.306559	0.303527	0.199512	0.250631	0.345042	0.386934	0.3254	0.311788	0.321343
822	255	232	386	441	0.388234	9899	1.34669	3.28188	0	170.633	40.9824	0	1966.44	34.7534	0.0300781	0.00985128	0.149224	9.70477e-05	2042.34	35.5379	0.0291013	0.00982388	0.115186	9.65087e-05	0.513679	0.0145009	0.273725	0.268218	0.268531	0.293825	0.192089	0.148108	0.273223	0.33302	0.246329	0.22387	0.299749	0.272365	0.196549	0.256862	0.394522	0.332136	0.182732	0.236437	0.394504	0.374833	0.29147	0.303131	0.322647
823	237	239	390	390	0.484041	6392.5	1.2415	3.52273	0.0232558	157.958	114.519	0	1714.35	32.3492	0.0334833	0.010238	0.22607	0.000104817	1624.86	31.7668	0.031904	0.0103302	0.26458	0.000106712	0.114385	0.907783	0.24557	0.24585	0.246578	0.300001	0.270818	0.226526	0.241553	0.276192	0.249042	0.236991	0.274946	0.264172	0.24347	0.256994	0.295679	0.25432	0.170316	0.21297	0.341992	0.35016	0.271306	0.229921	0.30222
824	237	242	388	393	0.470143	6198.5	1.18524	3.41584	-0.010101	157.811	106.757	0	1643.25	31.8221	0.0322522	0.0104919	0.225289	0.00011008	1566.56	31.1776	0.0316338	0.0105336	0.25886	0.000110958	0.0525803	0.80929	0.240037	0.209993	0.233572	0.295929	0.220426	0.163075	0.22313	0.331438	0.244558	0.243655	0.266429	0.280754	0.231791	0.231896	0.293618	0.273684	0.225304	0.233894	0.346058	0.384436	0.323388	0.280773	0.285475
825	236	241	388	389	0.405602	6895.5	1.22715	3.70297	0.010101	168.217	44.4776	0	2814.68	41.9749	0.0230553	0.00913091	0.0634528	8.33735e-05	2779.64	41.8327	0.0246091	0.00911856	0.0708076	8.31481e-05	0.330582	0.415485	0.241055	0.263609	0.276337	0.321503	0.285607	0.226502	0.256086	0.327057	0.295876	0.287126	0.335278	0.304963	0.227031	0.253658	0.34994	0.337104	0.221038	0.209014	0.331788	0.38654	0.343898	0.258845	0.306424
826	249	258	392	432	0.397315	10104.5	1	3.54167	-0.00704225	168.461	51.7514	0	1616.11	31.5811	0.032689	0.0105072	0.131254	0.0001104	1639.61	31.7841	0.032474	0.0105302	0.118275	0.000110885	0.92033	0.0909683	0.224732	0.264644	0.256692	0.270726	0.184758	0.141422	0.23111	0.355843	0.275142	0.23005	0.258834	0.238297	0.206104	0.250544	0.404175	0.340277	0.22369	0.253291	0.400181	0.361923	0.292334	0.28036	0.303204
827	235	234	382	386	0.475722	6941.5	1.05841	3.76991	0.018018	172.215	51.9065	0	2229.89	37.38	0.0283487	0.00988161	0.0753768	9.76463e-05	2179.32	36.8888	0.0278442	0.00986526	0.095086	9.73234e-05	0.947582	0.351595	0.248365	0.280299	0.251729	0.306324	0.241836	0.17856	0.178906	0.258017	0.260296	0.287948	0.30532	0.293972	0.243821	0.247242	0.293348	0.280356	0.228087	0.215363	0.313926	0.325913	0.265879	0.229436	0.284698
828	253	255	355	356	0.320693	3373.5	1.17021	3.49398	-0.0617284	184.201	40.8013	0	1492.08	30.4486	0.0329637	0.0117217	0.141352	0.000137398	1497.54	30.4512	0.0327988	0.0117861	0.135457	0.000138911	0.841164	0.525642	0.254679	0.287128	0.243607	0.283705	0.252707	0.229003	0.243864	0.316411	0.275141	0.282509	0.325653	0.326961	0.273065	0.258002	0.301926	0.310813	0.245435	0.226854	0.293639	0.330817	0.283082	0.276547	0.334858
829	255	255	375	370	0.241007	7385	3.26829	3.67832	0.0212766	183.553	42.2021	0	1570.24	30.9654	0.0330217	0.0111425	0.189281	0.000124155	1538.38	30.6914	0.0326967	0.0111252	0.204809	0.00012377	0.158679	0.244173	0.252904	0.25731	0.257745	0.300476	0.287603	0.268186	0.308517	0.330662	0.274355	0.272326	0.34352	0.335488	0.330628	0.305252	0.39424	0.354311	0.272567	0.252074	0.357925	0.355271	0.288532	0.299699	0.369404
830	245	244	401	395	0.343866	8789	1	3.68571	-0.00724638	174.698	45.7244	0	2588.79	40.1418	0.0243474	0.00880781	0.0805947	7.75775e-05	2509.64	39.4529	0.0255044	0.00884369	0.107431	7.82109e-05	0.419923	0.832505	0.310833	0.349429	0.301087	0.281143	0.223533	0.229159	0.288615	0.361795	0.332329	0.323899	0.344282	0.358682	0.328996	0.344943	0.389504	0.340017	0.214138	0.258594	0.424021	0.470145	0.402311	0.337819	0.378903
9	626	618	887	914	0.431627	279908	1.17448	3.61215	0.0125	103.186	601.686	0.552023	336.873	14.0302	0.0742002	0.0214022	0.349974	0.000458054	335.064	13.9785	0.0744623	0.0214289	0.352578	0.000459196	0.246243	0.295477	0.098736	0.105164	0.11614	0.119779	0.108474	0.076551	0.061002	0.075384	0.087615	0.106176	0.126588	0.143893	0.116091	0.120085	0.138613	0.129527	0.105886	0.124542	0.135694	0.113693	0.064598	0.070652	0.108009
10	684	674	940	921	0.386094	312156	1.02557	3.60627	-0.00956284	107.397	627.697	0.406876	377.298	14.9913	0.06875	0.020443	0.237657	0.000417915	369.283	14.8529	0.0693409	0.0204928	0.253689	0.000419955	0.20535	0.204933	0.098111	0.097328	0.099806	0.092924	0.085742	0.080423	0.093865	0.101878	0.100421	0.115065	0.149972	0.174332	0.120896	0.113167	0.110766	0.147021	0.121722	0.124953	0.11631	0.126097	0.082031	0.053614	0.049473
11	669	679	1043	1086	0.470392	444224	1.07005	3.64646	-0.00379747	97.4022	448.711	0.559454	1208.36	26.6039	0.0409	0.0115278	0.265894	0.00013289	1202.12	26.5374	0.0409153	0.0115386	0.269641	0.000133139	0.684826	0.172864	0.079571	0.083239	0.071044	0.066098	0.073372	0.044062	0.056182	0.075579	0.084912	0.069869	0.088048	0.12789	0.106256	0.06583	0.046485	0.081458	0.102878	0.117618	0.118439	0.106936	0.064745	0.044293	0.03685
12	396	574	1047	1093	0.402198	417146	1.18195	3.93663	0	91.0023	539.822	0.63025	176.494	9.99166	0.104934	0.0309621	0.366063	0.000958652	177.685	10.0274	0.104428	0.0309227	0.361771	0.000956212	0.486112	0.72627	0.27821	0.287943	0.28953	0.321941	0.245104	0.181061	0.180907	0.243163	0.270747	0.256651	0.231712	0.236311	0.231967	0.247792	0.26824	0.290111	0.281733	0.300165	0.316032	0.323127	0.29125	0.285723	0.338608
13	1025	1003	1429	1404	0.405149	984213	1.42647	3.72058	0.00481155	84.4941	485.334	0.884477	150.573	9.35563	0.110343	0.0325021	0.316278	0.00105638	148.403	9.28245	0.110768	0.0325792	0.326083	0.0010614	0.32491	0.546623	0.125091	0.130974	0.13966	0.156552	0.15608	0.142102	0.137056	0.137479	0.117032	0.095537	0.10993	0.147952	0.142496	0.146598	0.1336	0.144711	0.141072	0.144392	0.144925	0.136587	0.104283	0.082569	0.107698
14	1004	871	1263	1590	0.388417	951012	2.15711	3.64706	0.000785546	85.7205	543.668	0.750085	143.333	8.89357	0.11724	0.0347336	0.480951	0.00120642	152.531	8.98827	0.117094	0.0347042	0.447313	0.00120438	0.100214	0.695974	0.103877	0.134348	0.131817	0.125597	0.098979	0.087682	0.088438	0.090388	0.069858	0.064631	0.068369	0.083425	0.094385	0.112648	0.138895	0.148035	0.113615	0.108349	0.132202	0.132616	0.090664	0.06971	0.099565
15	971	995	1442	1349	0.486047	963974	1.45815	3.7201	0	90.8897	447.159	0.89972	156.9	9.41702	0.110384	0.0324836	0.35943	0.00105518	153.415	9.32472	0.111151	0.0325616	0.373726	0.00106025	0.544763	0.290345	0.076687	0.079373	0.100852	0.10405	0.091157	0.086033	0.099876	0.1026	0.079887	0.055279	0.061981	0.084645	0.078232	0.106066	0.109396	0.121162	0.102831	0.138893	0.141192	0.136478	0.093563	0.099598	0.109482
16	440	294	888	1181	0.220512	273688	1.46259	2.95562	0.00278164	115.785	472.918	0.268196	375.211	14.9806	0.0684161	0.0202864	0.252218	0.000411538	366.206	14.8631	0.0685944	0.0203307	0.270023	0.000413337	0.347025	0.400003	0.079874	0.093641	0.094978	0.105576	0.109439	0.089604	0.06785	0.063049	0.059841	0.052356	0.057341	0.096183	0.0845	0.082516	0.078474	0.103056	0.091728	0.102649	0.095323	0.093111	0.062859	0.053064	0.04535
17	543	540	909	920	0.423849	276438	1.43874	3.67236	-0.0046729	112.022	414.171	0.298476	1401.27	28.8177	0.0367746	0.0106864	0.247628	0.0001142	1410.39	28.9082	0.037111	0.010683	0.242495	0.000114127	0.391096	0.895607	0.110494	0.116776	0.138778	0.14318	0.148803	0.137494	0.098608	0.079644	0.07714	0.118512	0.139326	0.16768	0.130121	0.12489	0.127699	0.127706	0.10582	0.101862	0.137173	0.13605	0.08574	0.048007	0.094058
18	627	630	903	907	0.429003	282046	1.72523	3.66294	0.00160256	110.477	518.085	0.350247	709.254	20.6624	0.0504342	0.0148825	0.200283	0.00022149	709.332	20.6913	0.0500121	0.0148828	0.199451	0.000221497	0.310509	0.330402	0.083896	0.082472	0.075544	0.078099	0.098857	0.112414	0.140246	0.12996	0.10191	0.07872	0.113784	0.166142	0.142005	0.130727	0.114644	0.141723	0.118479	0.129293	0.121628	0.124079	0.112729	0.075335	0.089634
19	604	574	1189	1026	0.2714	450358	1.11486	4	0.00754717	109.886	420.044	0.32917	1152.4	26.213	0.0405346	0.0117853	0.246796	0.000138894	1169.15	26.3935	0.0399605	0.0117612	0.23586	0.000138326	0.387195	0.902949	0.301749	0.316593	0.327186	0.322272	0.307932	0.288827	0.289479	0.282236	0.298397	0.321731	0.365569	0.407098	0.342276	0.336151	0.313851	0.319802	0.311603	0.327126	0.331634	0.316999	0.312255	0.276815	0.323958
20	421	637	1087	1142	0.254738	488949	1.16448	3.60449	0.0020429	109.866	429.592	0.316794	808.691	22.0367	0.0472712	0.0142627	0.193349	0.000203426	810.699	22.019	0.047554	0.0142626	0.191002	0.000203422	0.55586	0.966285	0.156642	0.160384	0.154634	0.147457	0.15449	0.14635	0.131709	0.127834	0.144754	0.156874	0.171741	0.196406	0.189617	0.1791	0.165552	0.175366	0.142162	0.140818	0.158014	0.190418	0.138932	0.113565	0.132906
21	782	795	1334	1372	0.4317	869900	1.03276	3.62158	0	90.615	669.576	0.65358	317.616	13.4838	0.0796027	0.0226935	0.320546	0.000514997	313.364	13.4002	0.0799912	0.0227393	0.329469	0.000517075	0.0141438	0.0195341	0.067473	0.07457	0.065925	0.062326	0.070086	0.057867	0.0518	0.044499	0.073175	0.077795	0.089343	0.079683	0.072523	0.071065	0.07933	0.08674	0.081056	0.077542	0.092752	0.106317	0.057757	0.041884	0.053585
22	804	712	1424	1174	0.407064	556685	1.28827	3.56554	0.00105932	100.628	489.595	0.611644	380.874	14.9512	0.0701367	0.0207892	0.259178	0.000432192	377.477	14.8741	0.070469	0.0208288	0.265407	0.000433839	0.847647	0.49423	0.083498	0.07598	0.066231	0.064255	0.086564	0.075341	0.073397	0.091327	0.082486	0.052893	0.056414	0.11253	0.11676	0.122182	0.112223	0.130173	0.109277	0.100899	0.086997	0.08879	0.083913	0.063789	0.066973
23	868	888	1398	1443	0.461624	977136	14.8524	3.64094	-0.000840336	88.5954	451.638	0.702698	273.573	12.5194	0.0845369	0.0248464	0.280569	0.000617345	271.648	12.5071	0.0846052	0.0248489	0.285247	0.000617466	0.92192	0.622056	0.087649	0.103157	0.095553	0.105796	0.121105	0.110658	0.073012	0.075318	0.100271	0.119414	0.138149	0.158935	0.161439	0.157818	0.144115	0.110353	0.095492	0.092651	0.123592	0.117243	0.07445	0.050593	0.085978
24	754	779	1148	1047	0.397912	511176	1.48854	3.7105	-0.0010627	105.794	509.166	0.52186	199.487	10.8367	0.0948551	0.0284106	0.232219	0.000807163	192.411	10.6698	0.0951168	0.028525	0.25942	0.000813677	0.55053	0.0125014	0.103449	0.121935	0.152328	0.164449	0.172319	0.162928	0.145872	0.141289	0.127308	0.118688	0.120711	0.141507	0.134042	0.116352	0.102646	0.125256	0.141949	0.143312	0.128832	0.123851	0.110219	0.105459	0.098983
25	799	791	1116	1091	0.409926	495982	1.05068	3.71617	0	98.666	553.951	0.533439	445.29	16.2735	0.0640223	0.0186842	0.250353	0.000349099	439.008	16.1535	0.0645963	0.0187267	0.260365	0.000350689	0.268021	0.350164	0.059468	0.076433	0.089654	0.094138	0.094657	0.088179	0.087092	0.086878	0.094451	0.097363	0.104989	0.114156	0.089636	0.098341	0.109885	0.127682	0.120679	0.145911	0.150986	0.152736	0.107095	0.082683	0.091135
26	709	704	1016	990	0.460095	392650	1.05727	3.66835	-0.00126422	100.832	624.832	0.592909	343.104	14.2238	0.0732116	0.021083	0.320427	0.000444492	339.159	14.1438	0.0736013	0.021118	0.328229	0.000445969	0.990239	0.0280436	0.107284	0.11157	0.123202	0.149813	0.156055	0.110335	0.098157	0.120951	0.133483	0.105043	0.079756	0.078604	0.06696	0.085479	0.114852	0.131547	0.124463	0.102964	0.106133	0.110291	0.092301	0.063238	0.097268
225	988	996	1426	1383	0.330415	928914	1.04297	3.66595	0.00214439	70.3979	779.459	0.797674	117.221	8.26149	0.123842	0.0367928	0.257117	0.00135371	115.487	8.20991	0.124366	0.0368548	0.267934	0.00135828	0.383194	0.616491	0.07957	0.091949	0.095642	0.112468	0.118621	0.101563	0.101569	0.115935	0.112809	0.094956	0.110817	0.126965	0.134689	0.129464	0.137944	0.105207	0.073758	0.088689	0.118073	0.108126	0.101062	0.109395	0.087373
226	1256	1256	1810	1794	0.416927	1728867	1.03702	3.72466	0.0012012	56.7951	608.7	0.906346	93.8414	7.28653	0.14367	0.0416608	0.32036	0.00173562	92.9815	7.25504	0.144183	0.0417235	0.326475	0.00174085	0.693655	0.463158	0.051804	0.066262	0.078625	0.095062	0.092483	0.080686	0.084745	0.099782	0.097312	0.08459	0.082029	0.086753	0.095408	0.100648	0.112704	0.078563	0.057182	0.080866	0.120923	0.10885	0.081733	0.071014	0.045432
227	949	963	1735	1747	0.346772	1.51607e+06	1.02272	3.64609	0.00294291	59.5874	540.754	0.906403	199.191	10.4722	0.10427	0.0303054	0.3543	0.000918417	197.993	10.4349	0.104742	0.0303415	0.358137	0.000920606	0.689953	0.262915	0.044783	0.05859	0.063234	0.060774	0.067243	0.065115	0.072716	0.076912	0.071544	0.066231	0.06792	0.073733	0.07491	0.078112	0.08036	0.062201	0.045563	0.06471	0.077699	0.078523	0.06567	0.053364	0.021481
592	379	383	595	602	0.692959	72789.5	1.91405	3.70438	0.00367647	112.979	317.689	0.236298	239.573	11.8239	0.0860072	0.0241997	0.637821	0.000585627	233.579	11.7157	0.0868782	0.024252	0.648349	0.00058816	0.91816	0.594581	0.190749	0.179777	0.190896	0.176303	0.178966	0.138794	0.165715	0.141061	0.111615	0.126566	0.208017	0.231122	0.233877	0.233837	0.262864	0.206584	0.194609	0.207328	0.259063	0.266635	0.220403	0.214879	0.175739
619	404	398	563	593	0.675833	63507	3.29401	3.61957	0.0255474	121.814	615.708	0.212906	962.964	24.0928	0.0427502	0.012117	0.553092	0.000146821	960.118	24.0118	0.0428866	0.0121388	0.554432	0.000147351	0.596404	0.597546	0.245246	0.274005	0.277749	0.283713	0.267871	0.2252	0.246653	0.243289	0.175861	0.163538	0.250338	0.286078	0.284397	0.311836	0.305607	0.266729	0.239363	0.262958	0.280337	0.29048	0.259594	0.299108	0.256276
621	418	418	611	592	0.733089	72019	1.26039	3.70111	0.00371747	121.437	251.607	0.112082	489.719	17.0268	0.0605089	0.0179	0.547181	0.000320409	479.87	16.8773	0.0607731	0.0179433	0.556604	0.000321962	0.649501	0.0926619	0.203092	0.22995	0.246955	0.243816	0.226802	0.200227	0.228281	0.181075	0.169128	0.161487	0.248916	0.287689	0.319321	0.270751	0.254154	0.226256	0.222132	0.218226	0.235514	0.239439	0.233221	0.263279	0.266873
663	378	386	563	590	0.665679	61875.5	9.40534	3.51799	-0.0289855	109.302	428.005	0.350543	897.922	23.0459	0.045288	0.012839	0.668498	0.00016484	899.442	23.0451	0.0452846	0.0128383	0.668141	0.000164823	0.896426	0.77003	0.125196	0.151796	0.177018	0.173955	0.158576	0.128674	0.123685	0.107476	0.091281	0.165429	0.220192	0.22509	0.210554	0.264323	0.267869	0.23111	0.19316	0.200595	0.209624	0.203949	0.189361	0.20903	0.175001
578	394	385	647	628	0.697307	92196.5	1.08477	3.40532	0.00334448	92.5241	978.081	0.427012	437.577	15.6064	0.0698722	0.0172468	0.752208	0.000297454	435.715	15.5735	0.0704368	0.0172683	0.753542	0.000298195	0.485149	0.975834	0.19025	0.20976	0.240619	0.242305	0.247921	0.214139	0.236947	0.221097	0.19232	0.202653	0.232625	0.259639	0.268953	0.297167	0.27189	0.214817	0.196186	0.230468	0.296119	0.30864	0.28508	0.282061	0.220196
614	347	391	545	569	0.509924	53042.5	3.56255	3.89928	-0.00362319	138.127	291.356	0.0167036	1290.61	28.0504	0.0365254	0.0108242	0.437651	0.000117163	1257.16	27.67	0.0367846	0.0108468	0.453114	0.000117653	0.812326	0.783748	0.194832	0.238744	0.240976	0.219896	0.231758	0.188355	0.23293	0.193838	0.11832	0.09452	0.20481	0.246449	0.246754	0.249771	0.269007	0.213179	0.188459	0.20971	0.273921	0.299544	0.226445	0.183096	0.139444
636	347	356	598	581	0.712175	64493.5	1.28958	3.27798	0.00363636	114.606	398.591	0.188655	834.01	22.0799	0.0483011	0.0130846	0.696326	0.000171207	812.841	21.8482	0.0476882	0.0131175	0.704274	0.00017207	0.233294	0.173324	0.151733	0.198211	0.240606	0.244627	0.233703	0.162422	0.165238	0.147466	0.147679	0.155745	0.210668	0.258602	0.276069	0.268042	0.251432	0.1786	0.159376	0.213847	0.3275	0.316009	0.234875	0.184173	0.157653
674	488	412	815	564	0.45135	93291.5	1.54446	3.63702	0.0169082	79.344	605.862	0.7808	617.06	19.1063	0.0545181	0.0132951	0.700456	0.000176759	625.56	19.246	0.0547307	0.0132678	0.696688	0.000176036	0.673928	0.67648	0.10235	0.144423	0.166274	0.139748	0.127479	0.123735	0.148785	0.135588	0.096866	0.104548	0.141153	0.160239	0.163587	0.173576	0.174651	0.162701	0.183989	0.198882	0.228659	0.215285	0.194663	0.184275	0.154513
605	393	370	637	606	0.683715	89092	2.80334	3.30519	0.00326797	138.018	435.905	0.0564248	130.241	8.73645	0.112615	0.034221	0.509014	0.00117107	132.437	8.69723	0.113448	0.0342731	0.50506	0.00117465	0.58754	0.902114	0.159597	0.172007	0.203411	0.185466	0.191123	0.139611	0.177625	0.134492	0.125868	0.130149	0.200268	0.222709	0.255694	0.254532	0.210951	0.174838	0.198451	0.212637	0.222264	0.232764	0.220821	0.209142	0.171319
629	425	438	610	666	0.699658	92218	1.12534	3.36254	0	110.592	258.285	0.226116	691.66	20.222	0.0513383	0.0149383	0.597421	0.000223154	680.484	20.0857	0.0516199	0.0149681	0.604057	0.000224045	0.654753	0.0833692	0.252458	0.280731	0.293519	0.303469	0.278453	0.25339	0.275567	0.267347	0.215494	0.19945	0.266623	0.288323	0.307702	0.34833	0.355326	0.272566	0.229741	0.269085	0.326272	0.340682	0.300462	0.275641	0.24088
627	332	310	661	669	0.678323	105534	1.15358	3.71547	0.00555556	101.539	504.54	0.481966	414.81	15.1992	0.0693776	0.0196945	0.559644	0.000387875	425.096	15.2945	0.0695331	0.019681	0.548871	0.000387343	0.0450396	0.595567	0.186839	0.244827	0.240311	0.232905	0.255752	0.204817	0.208017	0.163852	0.150012	0.142172	0.226547	0.242874	0.248977	0.255633	0.257045	0.226784	0.213588	0.191212	0.188603	0.190485	0.196208	0.201695	0.195464
650	386	390	634	643	0.669594	89978.5	1.94317	3.54952	0.022508	107.914	374.794	0.336336	1127.32	25.8496	0.0407945	0.0110908	0.607438	0.000123006	1109.84	25.6626	0.0408106	0.0111297	0.613622	0.000123871	0.369039	0.395548	0.260275	0.299404	0.311217	0.308447	0.315359	0.287099	0.280589	0.249068	0.239713	0.267378	0.328053	0.334872	0.354627	0.340122	0.34047	0.284528	0.287957	0.268668	0.306512	0.304266	0.285562	0.27519	0.252099
584	432	430	713	720	0.686921	136222	1.0998	3.50131	-0.00263852	93.4445	526.927	0.551568	845.929	22.2453	0.0480358	0.0132217	0.631405	0.000174814	849.541	22.3442	0.0472305	0.0132058	0.630189	0.000174394	0.196309	0.0466077	0.180205	0.218377	0.224758	0.202864	0.194197	0.201085	0.210625	0.185512	0.133404	0.12867	0.183185	0.233545	0.229854	0.238363	0.235722	0.18816	0.142413	0.184475	0.255286	0.244823	0.180807	0.177868	0.144728
665	423	421	598	588	0.674982	64295.5	1.10488	3.57096	0	72.7952	678.104	0.817102	943.181	23.6964	0.0446141	0.0115994	0.651343	0.000134547	938.351	23.6211	0.0448249	0.0116102	0.653386	0.000134797	0.268124	0.193012	0.184082	0.204599	0.224366	0.221894	0.198266	0.145305	0.181214	0.172494	0.131999	0.151271	0.198168	0.218474	0.21814	0.255485	0.25968	0.206123	0.152312	0.160888	0.271127	0.267959	0.219138	0.175372	0.183702
667	349	364	569	599	0.674676	63693.5	1.13643	3.7053	0.00333333	101.35	499.29	0.49768	693.983	20.073	0.052997	0.0142426	0.766082	0.000202852	676.755	19.8685	0.0538769	0.0142634	0.772107	0.000203444	0.967501	0.274711	0.209938	0.230533	0.249066	0.235005	0.231921	0.197866	0.215316	0.187345	0.115211	0.135054	0.205155	0.258877	0.240913	0.255609	0.245513	0.21676	0.193254	0.232039	0.305957	0.313218	0.22487	0.215356	0.176561
585	346	375	582	564	0.446994	71156.5	1.34065	3.02606	0.00655738	134.323	356.369	0.0549071	1118.78	25.9807	0.0394601	0.0115082	0.532782	0.000132438	1121.51	25.9005	0.0405969	0.0115572	0.531578	0.00013357	0.860373	0.0125851	0.184744	0.218266	0.25108	0.242909	0.199559	0.159161	0.166689	0.155834	0.138485	0.159677	0.230578	0.261965	0.233934	0.212514	0.204941	0.168214	0.177302	0.221914	0.315982	0.297209	0.250323	0.233485	0.208156
651	361	366	573	557	0.734934	57789	1.10569	3.46209	-0.00363636	119.143	211.225	0.103861	152.65	9.04947	0.112446	0.0322716	0.708258	0.00104146	147.903	9.06204	0.111109	0.03225	0.717573	0.00104006	0.428663	0.750789	0.177376	0.246378	0.250365	0.227848	0.196434	0.16935	0.184933	0.170061	0.146006	0.178277	0.251995	0.266295	0.255079	0.261112	0.266594	0.22903	0.217629	0.210433	0.224714	0.202482	0.193253	0.223209	0.194001
630	376	391	572	610	0.720866	66745	1.11883	3.82101	0.00392157	102.158	827.754	0.390037	844.308	22.3094	0.0474443	0.0129438	0.683505	0.000167542	823.505	22.0858	0.047445	0.0129642	0.691527	0.00016807	0.101746	0.413089	0.17901	0.20064	0.19602	0.197505	0.190891	0.161196	0.140316	0.118566	0.114153	0.15741	0.214009	0.252072	0.264637	0.240413	0.242477	0.199081	0.199829	0.197494	0.298449	0.311506	0.260939	0.220153	0.185158
690	392	369	525	534	0.784361	40986.5	1.43568	3.47934	-0.00416667	61.8036	555.209	1.02124	326.861	13.4391	0.0836281	0.0205355	0.828411	0.000421705	313.991	13.1296	0.0848265	0.0206493	0.835538	0.000426395	0.0399131	0.936615	0.209388	0.212745	0.220981	0.207427	0.201653	0.175482	0.224319	0.204666	0.153384	0.16405	0.245776	0.274177	0.257463	0.2444	0.25729	0.241206	0.233581	0.238715	0.296768	0.316673	0.274816	0.222957	0.175117
574	549	536	842	794	0.679126	206670	1.69421	3.49416	-0.015625	97.1935	376.956	0.547572	162.733	9.71564	0.103735	0.0308422	0.618004	0.000951238	162.734	9.71908	0.103687	0.0308424	0.618433	0.000951251	0.434309	0.77759	0.136022	0.184631	0.198928	0.184776	0.156552	0.124056	0.146209	0.147449	0.136773	0.139432	0.220024	0.264704	0.256784	0.230287	0.238998	0.225694	0.197994	0.183449	0.193946	0.198986	0.21835	0.227933	0.21603
600	482	470	677	705	0.738217	119879	1.06118	3.28205	-0.00515464	98.2685	535.922	0.465286	312.761	13.6238	0.0747533	0.0221348	0.630843	0.000489948	316.939	13.6169	0.0748926	0.0221692	0.62615	0.000491474	0.196346	0.614536	0.191599	0.227036	0.240786	0.225269	0.217918	0.153554	0.193745	0.175085	0.152751	0.174183	0.258912	0.254048	0.237486	0.237335	0.234745	0.214096	0.216433	0.210873	0.202189	0.188889	0.199188	0.215267	0.211481
618	388	394	580	566	0.665212	62599.5	2.45097	3.81538	-0.00387597	137.296	201.768	0.00017572	1144.4	26.3416	0.0383063	0.0117644	0.393799	0.000138401	1121.78	26.0245	0.0396289	0.0118001	0.406369	0.000139242	0.527457	0.664815	0.145697	0.196066	0.226694	0.212985	0.18608	0.157731	0.21138	0.185648	0.123768	0.142973	0.226009	0.238343	0.216078	0.236039	0.241474	0.205141	0.160695	0.173791	0.214665	0.214243	0.169475	0.163303	0.171646
640	479	478	674	692	0.498465	107908	1.08469	3.62648	-0.00475059	142.5	505.581	0.0690122	653.993	19.9041	0.0508315	0.0150264	0.467601	0.000225794	650.3	19.8392	0.0514495	0.0150453	0.470222	0.000226362	0.329279	0.108247	0.201967	0.20991	0.200363	0.172035	0.165468	0.151217	0.142847	0.147045	0.145188	0.157947	0.197067	0.216132	0.234288	0.230486	0.226099	0.1969	0.197472	0.198661	0.202463	0.207616	0.200676	0.202481	0.191711
682	487	486	703	687	0.748482	121622	1.30495	3.66011	0.00564972	83.6046	449.93	0.856559	714.379	20.4271	0.051565	0.0145676	0.70445	0.000212214	692.386	20.1352	0.0521677	0.0146083	0.713716	0.000213402	0.498688	0.643685	0.167507	0.197574	0.226322	0.209447	0.217762	0.162452	0.199551	0.154956	0.10265	0.096643	0.177874	0.237376	0.242646	0.261497	0.240281	0.229729	0.187168	0.20539	0.268124	0.311808	0.265762	0.248212	0.183414
27	580	576	875	867	0.793918	258318	1.02548	3.73663	0.00596421	50.3476	367.77	0.953443	174.645	9.67462	0.115372	0.0306432	0.792908	0.000939007	173.908	9.64476	0.115794	0.0306804	0.793938	0.000941286	0.0300936	0.475249	0.140399	0.162566	0.189966	0.214539	0.226221	0.160201	0.130587	0.139197	0.151582	0.121019	0.122989	0.170043	0.170411	0.149441	0.13095	0.140579	0.158493	0.188098	0.236491	0.208341	0.110647	0.073037	0.135546
28	592	592	864	858	0.797186	250375	1.00904	3.51663	0	50.4352	358.919	0.954209	554.62	17.5035	0.0654	0.0167728	0.780285	0.000281327	548.486	17.4076	0.0657604	0.0167959	0.782833	0.000282101	0.339099	0.23536	0.134377	0.136442	0.113462	0.106988	0.09903	0.082984	0.094394	0.107573	0.121058	0.113372	0.109966	0.100751	0.100286	0.120768	0.11362	0.119278	0.11384	0.132856	0.125463	0.119477	0.089691	0.087987	0.096162
29	546	535	885	910	0.81727	281663	1.0437	3.58094	0.00361011	47.0453	341.469	0.964916	205.605	10.1019	0.115831	0.0314636	0.866436	0.000989958	205.339	10.0909	0.116771	0.0314843	0.86676	0.000991262	0.820969	0.56423	0.096812	0.143493	0.165688	0.174138	0.177579	0.144008	0.103547	0.076268	0.093536	0.158111	0.22347	0.232685	0.201692	0.212033	0.160742	0.106658	0.114488	0.194021	0.171109	0.146783	0.081157	0.087546	0.095276
30	531	534	896	902	0.806582	283626	1.05763	3.42441	-0.00365631	47.8886	336.012	0.962158	372.155	13.6688	0.0875682	0.0234096	0.8698	0.000548008	364.426	13.5684	0.088377	0.0234574	0.872618	0.00055025	0.458821	0.567532	0.176914	0.198741	0.179817	0.213055	0.239972	0.197968	0.193147	0.177851	0.193329	0.237895	0.341035	0.374085	0.229023	0.232469	0.265034	0.306335	0.231546	0.256064	0.287593	0.279741	0.165557	0.107951	0.181432
48	250	237	377	352	0.563988	2915	1.06479	3.47945	0.028169	131.938	329.226	0.0133791	1376.5	28.8452	0.0373776	0.0103389	0.720054	0.000106893	1325.25	28.5086	0.0355166	0.010397	0.730942	0.000108098	0.363897	0.514893	0.213113	0.213372	0.209393	0.215005	0.300346	0.269425	0.170667	0.122926	0.198219	0.270325	0.308018	0.357799	0.31032	0.347422	0.362045	0.32782	0.2914	0.26411	0.315494	0.231499	0.193115	0.254498	0.431369
44	313	311	464	442	0.520846	16577	1.21408	3.69388	-0.00689655	97.4825	609.828	0.608735	726.024	20.3583	0.0521052	0.013771	0.801298	0.00018964	691.151	19.9677	0.0522272	0.0138428	0.811075	0.000191623	0.116125	0.565739	0.228969	0.272007	0.368168	0.421005	0.349768	0.18914	0.176065	0.248834	0.287029	0.226384	0.248041	0.282626	0.309909	0.323219	0.296034	0.252716	0.262654	0.305056	0.344208	0.25438	0.193189	0.183189	0.329497
35	252	251	396	394	0.439767	4833	1.02088	3.75824	-0.011236	134.948	705.043	0.163046	1331.11	28.1703	0.0380231	0.0102387	0.701533	0.000104832	1279.84	27.7687	0.039831	0.0103111	0.71289	0.000106319	0.754523	0.85513	0.243719	0.296363	0.30806	0.300767	0.274823	0.243825	0.28925	0.228314	0.191927	0.203967	0.353414	0.419548	0.326494	0.317137	0.338454	0.384055	0.268401	0.280373	0.309174	0.365375	0.284433	0.316352	0.371305
60	336	476	346	426	0.559916	4315	1.17179	5.27027	-0.0571429	89.387	591.471	0.692932	809.657	21.6086	0.0495919	0.0124522	0.873653	0.000155058	850.452	22.3642	0.0457344	0.0123255	0.867415	0.000151919	0.345904	0.0813263	0.259116	0.296259	0.249583	0.295136	0.317035	0.249724	0.194823	0.237246	0.266312	0.297972	0.33875	0.392565	0.363254	0.306789	0.29602	0.277613	0.248173	0.239081	0.337761	0.340737	0.254105	0.256287	0.39206
66	271	256	399	387	0.759051	6362.5	1.14732	3.69118	0	79.6655	569.386	0.759921	798.272	21.7	0.0502837	0.0114896	0.842522	0.000132011	815.659	22.1082	0.0464334	0.0114433	0.839057	0.000130948	0.508437	0.605107	0.340528	0.380253	0.427529	0.437118	0.369435	0.283474	0.23688	0.270548	0.315759	0.347381	0.321027	0.333498	0.315935	0.335815	0.3147	0.251272	0.241286	0.331858	0.462819	0.421424	0.330289	0.292072	0.381357
56	241	276	346	339	0.702829	5349	1.82161	3.02326	0.0731707	153.16	314.886	0.00972144	1523.99	30.532	0.0347812	0.0112889	0.651747	0.00012744	1466.67	30.0396	0.0347694	0.0113519	0.66367	0.000128866	0.432239	0.656378	0.277412	0.298856	0.319841	0.4119	0.443719	0.302354	0.17254	0.177205	0.263548	0.34473	0.385193	0.363779	0.30981	0.321646	0.32079	0.286118	0.316029	0.379437	0.447042	0.391237	0.294273	0.280526	0.388152
37	267	256	376	411	0.559237	6486	3.83479	3.51852	0.00943396	123.41	519.083	0.137373	1170.27	26.6515	0.0379804	0.010366	0.73541	0.000107453	1196.05	26.8886	0.0390789	0.0103629	0.729966	0.00010739	0.352277	0.4651	0.277218	0.344144	0.33347	0.281724	0.286257	0.284117	0.281309	0.234355	0.182337	0.221573	0.31906	0.343192	0.265944	0.252962	0.301873	0.306559	0.281256	0.252442	0.402233	0.424866	0.251136	0.120001	0.293719
57	274	273	389	389	0.779864	5734	1.11638	3.64286	0	89.2172	737.04	0.66812	536.756	17.4084	0.0612288	0.016	0.822939	0.000255999	504.281	17.0724	0.0594557	0.0160195	0.833369	0.000256625	0.481115	0.251684	0.275865	0.194275	0.263259	0.362477	0.432299	0.285331	0.129301	0.143891	0.1936	0.320695	0.369562	0.388914	0.306338	0.274664	0.197131	0.170901	0.279406	0.353852	0.372884	0.276837	0.217442	0.25209	0.361023
55	267	270	391	419	0.655089	4562	1.68387	3.73684	0.027027	112.412	706.628	0.405085	907.276	23.1226	0.0449619	0.0125717	0.724502	0.000158047	885.973	22.927	0.0462073	0.0125778	0.731358	0.000158202	0.416415	0.203219	0.281358	0.323091	0.32259	0.324126	0.316196	0.269565	0.271192	0.316117	0.330603	0.301606	0.315361	0.388704	0.436936	0.48087	0.452992	0.369305	0.354869	0.413749	0.459035	0.409741	0.318744	0.392539	0.518298
47	272	290	414	460	0.533797	13704	1.4986	3.28346	0	135.18	524.825	0.0318155	972.053	23.9008	0.0443532	0.011785	0.724417	0.000138887	931.83	23.4907	0.0436974	0.0118718	0.735986	0.000140939	0.994005	0.376967	0.18005	0.235761	0.330449	0.375345	0.386082	0.238692	0.200196	0.126404	0.194653	0.271562	0.406752	0.386411	0.343298	0.330914	0.33606	0.392547	0.36568	0.289106	0.294619	0.318351	0.260886	0.202412	0.325219
39	267	265	411	404	0.60843	9200	1.4144	3.70476	0.00970874	144.838	167.337	0	346.127	13.7008	0.0743905	0.0214788	0.560802	0.000461337	355.43	13.7503	0.0768241	0.0215128	0.549617	0.000462802	0.398138	0.625413	0.263574	0.304608	0.26351	0.279704	0.310824	0.206259	0.183707	0.194285	0.22212	0.205326	0.235715	0.289502	0.274645	0.276587	0.237715	0.251776	0.252544	0.307942	0.305	0.28444	0.235337	0.258932	0.332783
46	260	275	435	397	0.701326	4028	1.5197	3.51852	0	112.151	520.013	0.390268	938.96	23.7016	0.0448571	0.0117622	0.707208	0.00013835	909.181	23.3846	0.0438973	0.0118016	0.716479	0.000139278	0.452341	0.0175099	0.273579	0.320269	0.328893	0.344935	0.375698	0.253886	0.203866	0.134664	0.191662	0.244186	0.323608	0.37629	0.323646	0.348608	0.272439	0.234362	0.226433	0.323088	0.373033	0.366767	0.290164	0.214673	0.338681
43	250	259	386	391	0.838572	5603	1.0545	3.64865	-0.0277778	82.8855	485.698	0.769052	786.337	21.2321	0.0521365	0.0128558	0.861005	0.00016527	759.372	20.9544	0.0514951	0.0129181	0.866181	0.000166876	0.0800065	0.488262	0.033965	0.03412	0.040494	0.049543	0.052543	0.046739	0.038278	0.032863	0.039985	0.050985	0.061477	0.057819	0.042809	0.041898	0.05032	0.056057	0.045268	0.043795	0.054908	0.065089	0.052684	0.051886	0.065103
63	295	304	440	458	0.815704	16940.5	1.18085	3.48611	-0.0140845	69.3527	625.192	0.854992	435.253	15.3243	0.0732357	0.0186237	0.887366	0.000346841	433.84	15.3367	0.0734537	0.0186453	0.887961	0.000347648	0.518243	0.22112	0.245363	0.29407	0.369379	0.423237	0.363396	0.287357	0.326843	0.24729	0.235067	0.268649	0.444769	0.41758	0.389232	0.316623	0.347009	0.313418	0.342376	0.367668	0.407074	0.361967	0.327045	0.323827	0.355512
40	279	281	434	437	0.797657	14666	1	3.4359	0	74.4886	573.358	0.820878	688.841	19.6766	0.0563013	0.0131904	0.862646	0.000173987	706.435	19.8831	0.0566205	0.0131889	0.859425	0.000173948	0.727191	0.372606	0.277889	0.355628	0.349449	0.327595	0.297927	0.276068	0.295498	0.309323	0.312144	0.282769	0.319186	0.390703	0.349414	0.290269	0.234797	0.27778	0.323428	0.394942	0.422292	0.356943	0.259953	0.294037	0.377624
50	241	238	371	375	0.781193	3713.5	1.36248	3.31343	0.0153846	103.844	512.196	0.51407	1002.64	24.5704	0.042002	0.0111124	0.804927	0.000123485	970.864	24.1635	0.0437442	0.0111899	0.811043	0.000125214	0.350539	0.821943	0.258324	0.268548	0.250802	0.28143	0.303832	0.264347	0.186471	0.128936	0.149229	0.206188	0.271905	0.275901	0.277513	0.28125	0.288721	0.27071	0.26054	0.259011	0.275306	0.288902	0.20842	0.307238	0.414669
31	342	342	477	508	0.803086	28663.5	1.15071	3.66316	0.00531915	75.5781	744.275	0.809182	531.519	17.1024	0.0639044	0.0168255	0.848373	0.000283098	533.437	17.0982	0.0641213	0.0168499	0.848158	0.000283918	0.0148406	0.0831199	0.185645	0.245816	0.19936	0.216121	0.224674	0.221409	0.234404	0.221122	0.228518	0.232115	0.252666	0.23834	0.209646	0.300283	0.342434	0.300173	0.200225	0.224273	0.246922	0.250837	0.226221	0.292677	0.332127
62	258	259	408	408	0.832843	8875.5	1.12569	3.59259	0	76.4016	538.398	0.82339	550.347	17.5538	0.0631621	0.0163234	0.873026	0.000266455	524.447	17.2342	0.0620645	0.0163469	0.879309	0.000267221	0.404651	0.313964	0.331164	0.353198	0.353716	0.343796	0.365504	0.357451	0.323433	0.262721	0.316743	0.369173	0.418297	0.370207	0.363318	0.39807	0.410232	0.388338	0.365019	0.329787	0.380146	0.380174	0.34649	0.342631	0.442969
36	249	239	384	370	0.719795	3810.5	1.14636	3.61111	-0.114286	113.51	770.595	0.488387	826.954	21.9861	0.0485327	0.0125468	0.777931	0.000157423	790.515	21.7198	0.0470867	0.012597	0.787869	0.000158685	0.351669	0.248447	0.440772	0.368453	0.301206	0.348811	0.389553	0.307409	0.248812	0.267896	0.310908	0.364987	0.399982	0.391164	0.313662	0.343814	0.346097	0.373203	0.32269	0.39076	0.435001	0.435594	0.307217	0.296556	0.413799
42	275	277	431	383	0.600493	8482.5	1.68012	4.06818	-0.00769231	125.285	671.188	0.211376	668.964	19.9159	0.0518984	0.0142327	0.748816	0.000202568	640.661	19.5117	0.0526958	0.0143075	0.759843	0.000204705	0.364342	0.214575	0.229699	0.20812	0.209272	0.310247	0.334896	0.293073	0.222931	0.1296	0.133527	0.27132	0.445269	0.436133	0.329644	0.309842	0.254438	0.263624	0.249389	0.286665	0.301888	0.320134	0.303798	0.280969	0.280734
32	311	314	483	473	0.790834	24197	1.05286	3.85897	0.00649351	72.9466	672.56	0.82035	608.485	18.2211	0.0619134	0.0146667	0.861142	0.000215113	571.558	17.8173	0.0623242	0.0147269	0.869797	0.000216881	0.16322	0.632817	0.21741	0.255454	0.231071	0.230309	0.277939	0.248189	0.218039	0.139256	0.090166	0.149157	0.289524	0.351842	0.211755	0.228396	0.273228	0.334322	0.223931	0.219236	0.268314	0.340448	0.272476	0.229711	0.315207
58	240	232	357	362	0.56358	2269.5	1.26214	3.26316	0.0545455	121.884	525.544	0.248072	1052.65	25.5245	0.0398823	0.011128	0.683216	0.000123833	1091.75	25.9544	0.0372628	0.0110501	0.670166	0.000122104	0.449212	0.664569	0.266046	0.299672	0.359899	0.386713	0.343551	0.26112	0.159781	0.158727	0.235709	0.374868	0.431331	0.404524	0.242131	0.239479	0.294743	0.307877	0.247137	0.325009	0.431426	0.410402	0.380134	0.333852	0.345455
52	251	253	396	384	0.710801	5186	1.19692	4	-0.0238095	92.1678	522.232	0.673351	998.934	24.4097	0.0442786	0.0108958	0.789321	0.000118719	887.129	22.845	0.047303	0.0109722	0.812753	0.000120389	0.637357	0.932163	0.14584	0.207874	0.277473	0.281854	0.279593	0.165443	0.093806	0.122806	0.152985	0.188108	0.239047	0.314056	0.321102	0.315699	0.309473	0.18667	0.242204	0.331328	0.448107	0.291942	0.169564	0.182786	0.351138
33	259	254	403	410	0.61823	7196	1.39859	3.25664	-0.027027	108.052	857.493	0.4408	884.425	22.8323	0.0449346	0.0111176	0.772044	0.0001236	868.179	22.7731	0.0456938	0.0111328	0.776219	0.000123939	0.739923	0.0970303	0.235442	0.26564	0.26589	0.229051	0.204946	0.186339	0.207589	0.19764	0.178271	0.171662	0.227683	0.29187	0.285231	0.2954	0.244925	0.233587	0.216654	0.270117	0.320292	0.372584	0.294729	0.2413	0.343249
803	263	262	412	412	0.666366	10194	1.14688	3.8125	0.0638298	132.258	317.644	0.0335491	1965.81	34.772	0.0294529	0.00852748	0.495793	7.27179e-05	1953.61	34.5489	0.0296162	0.008581	0.497391	7.36336e-05	0.193055	0.367004	0.425258	0.358932	0.342143	0.318215	0.225806	0.19095	0.310999	0.40755	0.318092	0.317347	0.295261	0.269806	0.225595	0.284973	0.335821	0.339986	0.294997	0.348903	0.422151	0.371116	0.261835	0.245456	0.302179
850	296	294	470	469	0.553467	21574.5	1.05048	3.78689	-0.00552486	138.137	342.276	0.0385177	2209.74	37.0048	0.0274349	0.00813923	0.264411	6.6247e-05	2176.3	36.745	0.0277863	0.00817844	0.274629	6.68869e-05	0.0821107	0.783102	0.208417	0.225154	0.232026	0.273149	0.220589	0.155475	0.182618	0.250433	0.232096	0.221913	0.237804	0.217141	0.224301	0.23571	0.229777	0.176691	0.15726	0.158749	0.167306	0.164052	0.141501	0.100695	0.083888
751	322	322	526	523	0.572593	32655	1.01983	3.49537	0	91.0203	604.733	0.613199	1561.19	30.498	0.0352233	0.00871621	0.538612	7.59723e-05	1574.76	30.6288	0.0338201	0.00871033	0.53438	7.58699e-05	0.82653	0.812651	0.337232	0.295683	0.327255	0.304317	0.196142	0.15468	0.25311	0.339267	0.251049	0.252874	0.318725	0.259812	0.221792	0.24106	0.390575	0.356651	0.289091	0.249068	0.341349	0.323006	0.239464	0.194201	0.239939
792	263	262	419	418	0.736243	10598.5	1	3.2069	0.0352941	122.441	318.907	0.135585	1279.42	27.8398	0.0381156	0.0100653	0.646126	0.00010131	1285.8	27.8411	0.0381453	0.010032	0.644177	0.00010064	0.645798	0.401946	0.245317	0.218998	0.241687	0.250398	0.126861	0.191077	0.327072	0.373075	0.264893	0.247735	0.257267	0.232926	0.252815	0.254055	0.293105	0.27004	0.2234	0.237929	0.310734	0.291873	0.230647	0.186484	0.238773
773	252	252	390	391	0.675305	7309	1	3.98718	-0.0131579	137.999	254.314	0	1022.82	24.754	0.0411306	0.0116438	0.479592	0.000135579	1046.04	24.9884	0.0414611	0.0116565	0.466325	0.000135874	0.49504	0.0209257	0.168788	0.159654	0.183094	0.197135	0.137125	0.121863	0.152259	0.21534	0.163558	0.162164	0.160024	0.170672	0.166896	0.182971	0.214998	0.186619	0.147651	0.162445	0.205392	0.180425	0.11739	0.073311	0.065485
877	272	271	431	429	0.645141	13491.5	2.06352	3.64384	0.0208333	127.84	315.592	0.0680428	1796.17	32.9732	0.0315484	0.00863068	0.551205	7.44887e-05	1784.43	32.9406	0.031894	0.00868587	0.553686	7.54444e-05	0.440062	0.76214	0.225761	0.235607	0.230477	0.294418	0.224265	0.145507	0.176734	0.265386	0.259213	0.214335	0.205096	0.186808	0.215236	0.264582	0.279244	0.252448	0.18864	0.186879	0.238645	0.252719	0.198852	0.185697	0.195006
816	279	280	450	448	0.699865	16393	1.03839	3.44628	-0.00840336	112.957	465.384	0.323675	1589.8	30.9689	0.0332981	0.00875351	0.590086	7.66239e-05	1579.26	30.8344	0.0337958	0.00879351	0.592774	7.73259e-05	0.669441	0.399097	0.380199	0.287839	0.264142	0.312764	0.212926	0.154275	0.238345	0.342186	0.246641	0.24994	0.297379	0.270016	0.209159	0.171994	0.202112	0.242406	0.251684	0.298979	0.313962	0.320245	0.238755	0.260383	0.199957
757	266	267	407	407	0.706296	9428	1.00479	3.80172	-0.00877193	110.894	290.694	0.346097	1378.79	28.7679	0.0367733	0.00919893	0.715122	8.46204e-05	1351.5	28.4898	0.0369755	0.00923564	0.720659	8.5297e-05	0.315162	0.957318	0.193788	0.238779	0.260125	0.259109	0.201215	0.192953	0.264183	0.317778	0.256793	0.255788	0.331832	0.344946	0.265097	0.231947	0.290431	0.323753	0.300306	0.317423	0.36385	0.374207	0.253954	0.238691	0.267802
851	255	256	396	394	0.677095	7919.5	1.66029	3.54023	-0.0117647	143.171	165.703	0	2128.23	36.2879	0.0271776	0.0087073	0.479108	7.5817e-05	2026.81	35.2969	0.0286078	0.00882351	0.503144	7.78543e-05	0.286787	0.421518	0.094669	0.112023	0.114506	0.118652	0.100056	0.081084	0.09304	0.125045	0.113171	0.095422	0.095815	0.099194	0.101704	0.114022	0.118591	0.102709	0.078712	0.101317	0.128548	0.126825	0.079986	0.067446	0.040506
834	326	311	513	490	0.587518	29115.5	2.99205	3.55838	-0.0307692	123.23	492.491	0.189349	1560.29	30.8875	0.0329146	0.00935141	0.423312	8.7449e-05	1558.01	30.9257	0.0332732	0.00933988	0.424397	8.72333e-05	0.0711944	0.496332	0.113354	0.137632	0.153299	0.199768	0.188698	0.169661	0.161456	0.199544	0.18606	0.201897	0.196068	0.170238	0.151536	0.167801	0.215754	0.223822	0.180574	0.167068	0.186944	0.192894	0.147793	0.126905	0.119317
765	242	241	366	364	0.671289	4285.5	1.65662	3.78667	-0.0136986	137.767	180.258	0	2218.49	37.0732	0.0292127	0.00902774	0.518123	8.15e-05	2128.89	36.2886	0.0267218	0.00916554	0.536351	8.40072e-05	0.146036	0.376128	0.244861	0.235228	0.201256	0.21199	0.166116	0.168599	0.185456	0.208898	0.166257	0.21505	0.262186	0.25215	0.190077	0.204233	0.298477	0.307274	0.258125	0.270462	0.331179	0.269365	0.167092	0.209973	0.258633
872	255	256	396	395	0.715128	7793.5	1.041	3.65116	0.0119048	136.992	223.957	0	2024.47	35.1204	0.0292018	0.00889049	0.55217	7.90408e-05	2046.47	35.2966	0.0283049	0.00881307	0.547152	7.76701e-05	0.221298	0.972688	0.125083	0.167383	0.18999	0.221857	0.186965	0.14949	0.158737	0.228901	0.191126	0.182696	0.169532	0.170852	0.168463	0.191132	0.182331	0.133443	0.125265	0.161205	0.209844	0.20425	0.167629	0.104517	0.067229
758	282	281	453	454	0.69621	17328.5	1.00174	3.68362	0	105.965	468.365	0.427388	1441.99	29.3688	0.0349252	0.00896239	0.636328	8.03245e-05	1413.19	29.1317	0.0360779	0.00899507	0.643295	8.09112e-05	0.205798	0.0295221	0.27483	0.254842	0.266217	0.318014	0.225332	0.209554	0.299242	0.357913	0.222637	0.272249	0.331217	0.270819	0.159289	0.262984	0.447312	0.39013	0.262799	0.254124	0.368813	0.318029	0.203214	0.216167	0.277839
857	299	300	427	430	0.596595	13432	2.68322	3.64234	0.0148148	137.55	404.51	0.0582936	148.322	8.61538	0.114073	0.0325949	0.499934	0.00106243	145.602	8.58944	0.116454	0.032608	0.509633	0.00106328	0.109233	0.0827421	0.116878	0.159547	0.16532	0.172355	0.129363	0.112387	0.142054	0.178227	0.151603	0.148509	0.152599	0.14484	0.131354	0.134103	0.132028	0.118296	0.117588	0.125014	0.132745	0.145556	0.134118	0.090918	0.049215
789	298	299	458	458	0.587272	19063	1.00628	3.62162	0.00684932	114.833	567.835	0.31868	636.168	19.6148	0.0519869	0.0142331	0.436644	0.000202581	636.332	19.6635	0.0506239	0.0142122	0.437772	0.000201986	0.475591	0.407676	0.291901	0.20763	0.223678	0.303573	0.294571	0.276661	0.333839	0.345599	0.27008	0.243061	0.320618	0.312327	0.30294	0.300339	0.345491	0.292039	0.254705	0.292126	0.363804	0.34518	0.254311	0.224488	0.261832
778	268	268	424	424	0.690414	12076.5	1.02309	3.60902	0.00763359	124.498	357.122	0.132986	1608.82	31.3069	0.0326116	0.00905759	0.566738	8.20399e-05	1612.9	31.2841	0.0334442	0.00909049	0.565234	8.2637e-05	0.318634	0.857983	0.286964	0.286427	0.316433	0.310486	0.27518	0.187698	0.165954	0.184943	0.190506	0.195408	0.247616	0.255819	0.254959	0.262738	0.312173	0.299711	0.292374	0.32148	0.345684	0.28853	0.193181	0.145841	0.158556
849	283	284	452	451	0.680607	16848.5	1.01452	3.64	0.0337838	119.49	304.37	0.154079	1430.31	29.3132	0.0359696	0.00964756	0.569817	9.30755e-05	1425.56	29.3736	0.0358703	0.0096487	0.570817	9.30974e-05	0.70648	0.798985	0.145429	0.162575	0.182507	0.202692	0.180648	0.135751	0.139295	0.172843	0.175058	0.181653	0.184141	0.178427	0.174028	0.184701	0.191493	0.178847	0.153288	0.174256	0.199187	0.194795	0.12536	0.099807	0.090781
747	311	311	477	476	0.659478	23229	1.05697	3.48148	-0.0075188	109.69	470.999	0.331353	1418.1	29.451	0.0341949	0.00954328	0.5163	9.10741e-05	1443.55	29.6594	0.0345781	0.00953167	0.507625	9.08527e-05	0.0169483	0.217124	0.131082	0.115464	0.163211	0.218194	0.164859	0.146944	0.177516	0.235185	0.168114	0.180529	0.198803	0.214517	0.180217	0.206783	0.245512	0.23105	0.185163	0.187175	0.220624	0.199267	0.121608	0.074985	0.078211
858	254	256	389	391	0.713942	6530.5	1.01174	3.22917	-0.0106383	123.024	333.456	0.127862	771.268	19.7188	0.0575317	0.0140838	0.623441	0.000198352	588.143	18.3591	0.057744	0.0142205	0.714105	0.000202222	0.0152858	0.429565	0.104683	0.139612	0.164886	0.179208	0.142534	0.114029	0.115902	0.150845	0.139511	0.158126	0.170788	0.168229	0.138251	0.143947	0.178075	0.176614	0.15498	0.154795	0.176048	0.15237	0.114806	0.074739	0.074172
870	262	262	411	409	0.709881	9831.5	1.00158	3.50467	0.0190476	138.823	262.703	0.000305142	1703.06	32.1252	0.0314968	0.00931022	0.497031	8.66801e-05	1645.64	31.6392	0.0324222	0.00936617	0.512959	8.77251e-05	0.584525	0.34088	0.151358	0.179538	0.196354	0.210539	0.168861	0.128583	0.163636	0.230291	0.202595	0.151794	0.138801	0.166064	0.186286	0.196003	0.234067	0.216626	0.167057	0.162232	0.204604	0.180911	0.134759	0.093781	0.082321
811	345	388	473	612	0.427663	44859	1.78016	3.69076	0.00404858	121.273	476.434	0.208119	1279.59	27.92	0.0365262	0.0105201	0.353647	0.000110672	1247.55	27.5914	0.0369257	0.0105366	0.369984	0.00011102	0.235638	0.436476	0.217914	0.175066	0.161994	0.227679	0.173468	0.168892	0.216344	0.275592	0.188393	0.194162	0.208822	0.178364	0.095802	0.123143	0.239444	0.293513	0.238845	0.228681	0.265162	0.241515	0.161291	0.109655	0.105057
787	248	249	383	379	0.604412	5938.5	1.03314	3.7013	0.0533333	134.149	234.742	0	1972.95	34.924	0.0284826	0.0090122	0.500252	8.12198e-05	1850.14	33.8237	0.029426	0.00910735	0.530551	8.29438e-05	0.92977	0.229555	0.169834	0.140472	0.164577	0.232406	0.207814	0.172427	0.212902	0.24829	0.176398	0.162729	0.19514	0.190324	0.165261	0.16032	0.219	0.219947	0.201747	0.185665	0.207775	0.19675	0.145595	0.09317	0.089967
856	270	271	429	425	0.624542	11838	1.26529	3.32353	0.00746269	128.042	427.69	0.119784	1550.13	30.7836	0.0347691	0.00925075	0.485428	8.55764e-05	1530.98	30.5637	0.0325727	0.00927414	0.491701	8.60097e-05	0.0840762	0.755466	0.180167	0.209234	0.205913	0.203377	0.183633	0.174529	0.186348	0.219335	0.21708	0.216012	0.202935	0.184139	0.188621	0.196638	0.213622	0.197207	0.185217	0.188309	0.223938	0.234585	0.185125	0.147109	0.111698
800	296	297	462	458	0.542128	17300.5	1.80711	3.67939	0.0232558	110.087	489.756	0.371377	644.015	19.7182	0.0513891	0.013335	0.459661	0.000177822	638.197	19.6443	0.0518751	0.0133483	0.463528	0.000178177	0.442673	0.490586	0.326422	0.265941	0.263156	0.259498	0.196322	0.198936	0.333263	0.414824	0.288137	0.252619	0.305259	0.269872	0.180155	0.157127	0.279562	0.306282	0.254787	0.217501	0.252043	0.216961	0.163576	0.173633	0.20539
[truncated: 732 more columns]

## Sheet: Mixture 5
Table S4 Colony information of Mixture 5
index	x_micro	y_micro	nWidth	nHeight	Feature1	Feature2	Feature3	Feature4	Feature5	Feature6	Feature7	Feature8	Feature9	Feature10	Feature11	Feature12	Feature13	Feature14	Feature15	Feature16	Feature17	Feature18	Feature19	Feature20	Feature21	Feature22	Raman0	Raman1	Raman2	Raman3	Raman4	Raman5	Raman6	Raman7	Raman8	Raman9	Raman10	Raman11	Raman12	Raman13	Raman14	Raman15	Raman16	Raman17	Raman18	Raman19	Raman20	Raman21	Raman22
888	266	264	420	422	0.726209	10846	1.01629	3.28713	-0.010101	120.419	414.483	0.193528	1530.33	30.2978	0.0342246	0.00892135	0.634143	7.95905e-05	1495.63	29.9426	0.0344859	0.00895089	0.64209	8.01184e-05	0.392118	0.296463	0.181748	0.179246	0.177306	0.194729	0.183521	0.171817	0.178331	0.20291	0.177819	0.180605	0.213618	0.266259	0.215583	0.203807	0.205077	0.207399	0.180453	0.196321	0.221255	0.195442	0.180378	0.230302	0.254309
1076	262	261	415	416	0.736233	9997	1.01414	3.7963	-0.00943396	114.178	409.872	0.306892	1426.81	29.3861	0.03476	0.00906107	0.717485	8.2103e-05	1424.23	29.4145	0.0355216	0.00907501	0.717812	8.23559e-05	0.744781	0.860543	0.132144	0.15565	0.189461	0.17946	0.15937	0.156863	0.179179	0.19819	0.183693	0.161588	0.1647	0.195818	0.181052	0.150997	0.137575	0.175436	0.186695	0.173615	0.138397	0.130511	0.126993	0.190087	0.216979
945	279	278	409	408	0.747184	8779	1.01305	3.53271	-0.0666667	124.468	380.808	0.101378	1566.03	30.5484	0.033741	0.0090624	0.625465	8.2127e-05	1514.02	30.2138	0.0338348	0.00909292	0.637308	8.26812e-05	0.763683	0.872735	0.140198	0.165545	0.19762	0.268111	0.211009	0.130352	0.117213	0.198029	0.206352	0.169485	0.166543	0.215181	0.213802	0.232148	0.299538	0.328197	0.278311	0.253895	0.283834	0.229951	0.207857	0.233124	0.270002
1070	257	255	405	408	0.753625	8432.5	1.02662	3.59223	0.00990099	118.895	365.225	0.196857	1210.11	26.8832	0.039087	0.0102347	0.720251	0.00010475	1227.95	26.9288	0.0387404	0.0102516	0.716343	0.000105096	0.717758	0.480976	0.166042	0.183416	0.179494	0.219276	0.190799	0.152638	0.138607	0.174135	0.176971	0.187737	0.203499	0.216807	0.193182	0.240531	0.336183	0.325705	0.272018	0.318243	0.340818	0.21105	0.109837	0.19316	0.268201
996	253	253	399	400	0.727859	7517	1.01371	3.31183	0.021978	124.89	352.506	0.0803512	720.026	20.6971	0.0491413	0.0123291	0.688556	0.000152008	750.407	20.8092	0.0512483	0.012434	0.675122	0.000154605	0.521533	0.00779298	0.179797	0.188686	0.185964	0.205802	0.17121	0.15224	0.166527	0.171907	0.196442	0.146042	0.201381	0.232676	0.232335	0.210029	0.318504	0.324485	0.221817	0.239656	0.309276	0.22991	0.117927	0.147897	0.20711
990	269	269	400	400	0.714852	7576	1.0495	3.56471	0.0120482	124.82	355.977	0.0807814	1368.56	28.8058	0.0348642	0.00941051	0.71585	8.85578e-05	1398.91	28.9915	0.0353807	0.00941702	0.709455	8.86803e-05	0.354265	0.593238	0.154542	0.168422	0.164306	0.168591	0.173708	0.174532	0.166208	0.171508	0.178579	0.161899	0.149161	0.189923	0.206218	0.261653	0.301568	0.28889	0.236551	0.249025	0.269991	0.209654	0.151104	0.200438	0.262111
894	276	276	444	442	0.724463	15236.5	1.01163	3.4359	0.00649351	110.412	439.563	0.380074	833.271	22.1893	0.0488858	0.0114149	0.700815	0.0001303	836.54	22.3353	0.0457822	0.0113907	0.699539	0.000129748	0.737995	0.553714	0.149513	0.140231	0.159079	0.239803	0.228874	0.185322	0.16764	0.200521	0.193827	0.169034	0.168965	0.193355	0.163935	0.217482	0.318251	0.326443	0.241082	0.273989	0.356377	0.261742	0.180534	0.205318	0.261964
965	276	276	418	418	0.760377	10191	1.01428	3.31	-0.0816327	114.761	407.627	0.291335	1144.06	26.3242	0.0385824	0.00996092	0.742513	9.922e-05	1146.5	26.2785	0.038929	0.00998093	0.742045	9.9619e-05	0.357398	0.117518	0.113123	0.12905	0.168714	0.187043	0.169055	0.152137	0.140497	0.163224	0.166247	0.178496	0.185036	0.201793	0.16456	0.205375	0.258571	0.268102	0.225886	0.231473	0.248113	0.195023	0.175915	0.176106	0.182589
954	254	254	391	392	0.768138	6267.5	1.03758	3.29333	0	124.784	375.116	0.0976466	1364.86	28.6672	0.0356567	0.00965509	0.728478	9.32207e-05	1359.73	28.5384	0.0371272	0.00962888	0.729484	9.27153e-05	0.594432	0.363028	0.174374	0.180959	0.18588	0.192257	0.154733	0.130339	0.148055	0.1917	0.217789	0.194164	0.182542	0.206544	0.234828	0.278115	0.360792	0.322114	0.283696	0.297337	0.364913	0.252987	0.205887	0.246804	0.281217
1023	249	250	396	397	0.758707	6696.5	1.00836	3.67164	0.0153846	124.928	357.791	0.0713806	1270.26	27.6904	0.0380142	0.0100154	0.732921	0.000100308	1274.7	27.6025	0.0399289	0.0100521	0.732031	0.000101044	0.457412	0.611599	0.219564	0.22162	0.214883	0.189322	0.167979	0.164601	0.200884	0.226405	0.213127	0.164094	0.15399	0.189577	0.196276	0.232254	0.267341	0.284749	0.24448	0.242052	0.239652	0.179951	0.166901	0.191181	0.23898
1061	266	265	419	419	0.755226	10584.5	1.06102	3.68085	-0.0217391	114.663	388.834	0.288252	1272.05	27.5194	0.0401619	0.0095643	0.726935	9.14759e-05	1263.5	27.4453	0.0382646	0.00956829	0.728571	9.15522e-05	0.2014	0.978697	0.229624	0.234906	0.222041	0.216164	0.200957	0.175598	0.17929	0.207617	0.19481	0.178297	0.186313	0.2079	0.200749	0.221382	0.316746	0.337219	0.305055	0.268311	0.305271	0.252962	0.192932	0.229761	0.276121
1049	258	257	407	410	0.745879	9171	1.87598	3.28283	-0.0206186	115.31	426.256	0.297787	1196.58	26.4436	0.03923	0.0103532	0.740385	0.00010719	1189.36	26.3289	0.0394743	0.0103937	0.74215	0.00010803	0.751644	0.595286	0.159128	0.222478	0.183199	0.124781	0.1164	0.138498	0.139794	0.130039	0.155584	0.174253	0.219908	0.248527	0.22597	0.194843	0.197708	0.226912	0.243447	0.248203	0.231372	0.20649	0.210628	0.231127	0.250536
1020	322	277	414	416	0.7796	9851.5	1.01158	4.02913	0.019802	115.127	450.907	0.334467	1148.23	26.0665	0.0410064	0.00983374	0.758701	9.67024e-05	1161.35	26.3719	0.0391391	0.00979446	0.756139	9.59314e-05	0.296861	0.91624	0.258957	0.27533	0.297204	0.3084	0.249273	0.206072	0.226973	0.300018	0.293977	0.224634	0.188931	0.230896	0.237392	0.298111	0.353417	0.359557	0.287256	0.388827	0.42703	0.339773	0.209592	0.266246	0.321345
952	239	237	368	369	0.736801	4073.5	1.01504	3.71429	0	138.382	283.152	0	1763.68	32.7082	0.032671	0.00934441	0.669082	8.73179e-05	1682.62	32.105	0.0330765	0.00931797	0.683879	8.68245e-05	0.723416	0.2324	0.154286	0.165094	0.185794	0.208848	0.167091	0.122497	0.138297	0.199685	0.193899	0.168446	0.174526	0.190512	0.18948	0.256046	0.311836	0.291225	0.24058	0.255282	0.286569	0.210585	0.150069	0.217558	0.263365
1057	252	252	398	400	0.728381	7476	2.43382	3.22619	-0.0853659	122.11	391.821	0.1561	1291.25	27.8296	0.036989	0.00988827	0.705693	9.77779e-05	1281.43	27.5894	0.0386319	0.00994016	0.707902	9.88069e-05	0.399379	0.727857	0.155875	0.172132	0.206308	0.232694	0.204379	0.17669	0.160922	0.170419	0.176533	0.168137	0.159729	0.16633	0.143616	0.204338	0.272231	0.280262	0.217283	0.281054	0.321412	0.233606	0.158689	0.212827	0.239368
1046	254	255	406	406	0.782349	8627	2.57114	3.82105	0.0107527	115.464	422.747	0.291527	466.276	16.4983	0.0631393	0.0158094	0.77014	0.000249939	511.659	16.7544	0.0615375	0.0158311	0.748011	0.000250624	0.927577	0.763857	0.158563	0.17546	0.200738	0.2163	0.195267	0.175786	0.186488	0.215506	0.206844	0.178771	0.171022	0.183017	0.174413	0.202718	0.293463	0.344039	0.291437	0.288316	0.351342	0.261448	0.15388	0.180955	0.255505
1069	241	241	378	378	0.766905	4572.5	1.0192	3.23457	0.0126582	125.007	365.121	0.0898852	1371.41	28.6746	0.0369154	0.0100626	0.745235	0.000101256	1282.41	27.7639	0.0387813	0.0100972	0.76164	0.000101953	0.206096	0.152456	0.181364	0.179055	0.182026	0.186072	0.180425	0.189457	0.224361	0.247074	0.21249	0.203768	0.234132	0.27403	0.214939	0.239786	0.31206	0.326203	0.269363	0.25765	0.283312	0.218483	0.155289	0.197362	0.261234
897	252	252	400	401	0.717247	7561	1.0126	3.7561	-0.0125	130.644	354.267	0.0125645	1584.12	31.1711	0.0335095	0.00907073	0.60006	8.22782e-05	1612	31.2751	0.0334374	0.00909116	0.592356	8.26491e-05	0.531551	0.957845	0.135997	0.141343	0.159877	0.186686	0.187146	0.169176	0.166884	0.189528	0.193106	0.196033	0.208595	0.220905	0.191998	0.209075	0.239691	0.255806	0.237956	0.243268	0.230662	0.186469	0.187336	0.257995	0.277268
924	232	232	361	360	0.739013	3073.5	1.01906	3.60317	0.0327869	137.788	316.346	0	1233.9	27.186	0.0379748	0.0108947	0.745233	0.000118695	1211.9	26.9198	0.0393441	0.0109412	0.749293	0.000119711	0.250455	0.974791	0.185767	0.178138	0.176009	0.18026	0.15563	0.147813	0.158712	0.175584	0.180399	0.159687	0.153055	0.186872	0.190991	0.204169	0.287361	0.311604	0.269833	0.299599	0.366452	0.288295	0.178142	0.226273	0.285645
1063	259	257	413	411	0.745958	9247.5	1	3.92857	0.0208333	118.724	377.942	0.203514	973.489	24.1298	0.0441964	0.0108042	0.711719	0.000116732	982.987	24.2412	0.0428599	0.0108084	0.708862	0.000116821	0.467988	0.808757	0.149473	0.1739	0.189347	0.203661	0.185298	0.157837	0.160787	0.231954	0.224366	0.187949	0.173283	0.240458	0.214526	0.251312	0.315587	0.331804	0.25793	0.321833	0.350281	0.257123	0.152027	0.221783	0.270968
977	266	242	421	367	0.589324	6415.5	1.02375	3.88393	-0.00909091	134.333	268.377	0	1249.81	27.2559	0.0381767	0.0102092	0.721573	0.000104227	1293.67	27.701	0.0389767	0.0101908	0.711601	0.000103852	0.240856	0.728735	0.132495	0.132911	0.130497	0.135777	0.128038	0.117371	0.122598	0.16214	0.214084	0.175499	0.124091	0.151053	0.165194	0.188741	0.293522	0.364742	0.299351	0.284408	0.298858	0.215551	0.164232	0.194065	0.206808
1088	243	242	368	369	0.762382	4048	2.57173	3.70968	-0.0166667	128.89	309.749	0.0242095	1458.11	29.6563	0.0348661	0.0101551	0.727845	0.000103127	1373.67	28.9483	0.0347807	0.0101697	0.743608	0.000103423	0.0490971	0.742209	0.170682	0.200608	0.234564	0.228341	0.171674	0.132617	0.180271	0.253276	0.220056	0.156813	0.161161	0.206951	0.213628	0.218704	0.273731	0.308805	0.275135	0.226399	0.237156	0.193328	0.174588	0.18776	0.234622
1090	244	244	388	387	0.69185	5985.5	1.02765	3.70732	-0.0375	127.373	302.257	0.0290703	1727.87	32.2642	0.0330034	0.00900807	0.643175	8.11454e-05	1770.46	32.5908	0.0321966	0.00899732	0.634388	8.09518e-05	0.518717	0.221945	0.11139	0.119794	0.125737	0.149859	0.126332	0.107743	0.112982	0.143418	0.169419	0.155548	0.138975	0.142305	0.161933	0.195869	0.244674	0.273346	0.27142	0.265989	0.250999	0.18032	0.163873	0.215961	0.254524
1074	271	271	398	400	0.792743	7247	1.05919	3.43902	0.0125	115.261	395.983	0.282462	1103.81	25.3627	0.0402104	0.0105863	0.771946	0.00011207	1109.39	25.5972	0.042831	0.0105723	0.770662	0.000111774	0.6359	0.0816847	0.149867	0.154331	0.202283	0.245303	0.161143	0.136254	0.194221	0.240394	0.202315	0.184268	0.177314	0.190832	0.209388	0.204872	0.195682	0.198997	0.216172	0.230156	0.229869	0.191473	0.177078	0.219128	0.249065
1027	340	349	442	557	0.35439	20420	1.04836	3.51942	-0.00490196	123.962	393.737	0.135162	450.377	16.2052	0.0640304	0.0168639	0.715869	0.000284392	447.999	16.2001	0.0643338	0.0168584	0.716749	0.000284207	0.708697	0.750192	0.266248	0.325921	0.226117	0.194439	0.094278	0.150806	0.158131	0.192118	0.199155	0.34835	0.380022	0.335733	0.279657	0.319558	0.350351	0.368357	0.330468	0.284147	0.300126	0.284757	0.315685	0.263321	0.249102
983	258	258	410	409	0.748338	8949.5	2.18286	3.54348	0	116.929	397.267	0.252863	407.855	14.6668	0.070689	0.0173192	0.719147	0.000299956	394.965	14.5791	0.0721009	0.0173794	0.728085	0.000302043	0.321981	0.868223	0.163268	0.161472	0.138771	0.141407	0.123005	0.105989	0.120968	0.171516	0.190519	0.180609	0.181715	0.224007	0.209772	0.236673	0.268903	0.289235	0.228237	0.221687	0.250123	0.196533	0.146955	0.198457	0.261591
909	274	275	403	403	0.699774	8076.5	1.01411	3.50435	0.00884956	125.878	357.023	0.069956	1551.31	30.7511	0.0347315	0.00899716	0.644252	8.09489e-05	1561.33	30.7405	0.0343337	0.00901871	0.641609	8.13371e-05	0.0921049	0.583884	0.103684	0.112629	0.116521	0.180167	0.194459	0.167536	0.14728	0.181975	0.175204	0.162397	0.159378	0.172309	0.169541	0.216809	0.265995	0.274175	0.249543	0.293727	0.294001	0.224046	0.157295	0.219893	0.272737
904	260	262	414	414	0.789434	9776.5	1	3.8617	0	121.837	400.975	0.161203	1234.87	27.0545	0.0380361	0.00994339	0.687267	9.8871e-05	1193.49	26.7313	0.0385212	0.00994685	0.697298	9.89397e-05	0.322959	0.156783	0.12784	0.146249	0.138078	0.128867	0.132908	0.224546	0.282505	0.301282	0.217258	0.187221	0.169271	0.226132	0.21035	0.229212	0.282323	0.285839	0.218953	0.259129	0.326631	0.247995	0.155211	0.202805	0.237675
1054	262	262	418	417	0.73617	10486	1.04299	3.61864	0	116.922	387.143	0.24814	701.134	20.5024	0.0503526	0.0128139	0.695509	0.000164195	703.765	20.5828	0.0503215	0.0128284	0.694478	0.000164567	0.128631	0.242881	0.109811	0.087986	0.130743	0.173649	0.17618	0.145532	0.124997	0.154465	0.177563	0.196109	0.215021	0.242352	0.211556	0.224157	0.283178	0.290434	0.223813	0.197101	0.229354	0.177329	0.159999	0.169556	0.202818
895	242	241	361	362	0.719123	2779	1.01938	3.50909	0.0377358	147.191	242.031	0	1656.68	31.4428	0.0346334	0.0101739	0.655107	0.000103507	1670.15	31.3242	0.0347002	0.010228	0.652002	0.000104612	0.182492	0.756005	0.319137	0.296581	0.277971	0.23264	0.198271	0.192502	0.238098	0.282305	0.302526	0.291256	0.298639	0.321693	0.331967	0.37816	0.413089	0.403092	0.345421	0.415541	0.454018	0.363699	0.295856	0.379059	0.424265
934	252	253	403	401	0.777881	7845.5	1.05319	3.35106	-0.076087	114.894	430.806	0.299152	1071.85	25.3387	0.0400206	0.010464	0.798389	0.000109496	1059.95	25.1868	0.0395392	0.01048	0.80069	0.00010983	0.304121	0.0894029	0.158036	0.15732	0.182629	0.208501	0.183628	0.169815	0.18154	0.195199	0.193645	0.166338	0.161171	0.179895	0.195888	0.232093	0.295783	0.298145	0.25422	0.233781	0.256072	0.206421	0.170487	0.158374	0.169032
1017	254	256	406	403	0.75101	8307.5	1.08158	3.43023	0	121.444	383.1	0.151068	1412.89	29.369	0.0349667	0.00922033	0.707782	8.50144e-05	1419.71	29.4569	0.0350431	0.00921532	0.705804	8.49221e-05	0.450636	0.332778	0.131191	0.107861	0.102368	0.133451	0.156717	0.158212	0.165494	0.188101	0.181021	0.176903	0.191996	0.226136	0.192883	0.217446	0.255136	0.276881	0.223116	0.214913	0.229894	0.202939	0.173689	0.175116	0.227788
1037	260	259	393	393	0.773278	6605	2.39312	3.37349	-0.0987654	125.757	344.81	0.0513248	1432.2	29.1727	0.0363259	0.0096162	0.687992	9.24712e-05	1452.98	29.1949	0.0356041	0.00964586	0.683175	9.30427e-05	0.696311	0.380042	0.142694	0.169616	0.199244	0.203071	0.153107	0.110621	0.103653	0.145899	0.169061	0.154661	0.139595	0.156692	0.162169	0.199033	0.291834	0.302594	0.235892	0.195765	0.238272	0.205156	0.155275	0.163878	0.183218
972	255	254	405	404	0.752443	8135	1.00255	4.02299	0.0470588	124.193	377.588	0.107191	1410.56	29.1573	0.0359415	0.00934458	0.692296	8.73211e-05	1408.16	29.2091	0.0354662	0.0093157	0.692954	8.67824e-05	0.762548	0.0182499	0.113793	0.129507	0.150546	0.171485	0.157488	0.147654	0.155643	0.182085	0.205913	0.193124	0.181329	0.197356	0.210756	0.24437	0.302863	0.30154	0.256668	0.247291	0.28394	0.242987	0.187789	0.197895	0.200882
948	251	252	399	401	0.745784	7640	1.01418	3.71765	0.0120482	130.413	329.809	0.00589005	468.27	16.382	0.0623892	0.01643	0.636767	0.000269945	461.722	16.3453	0.0624138	0.0163875	0.641958	0.000268549	0.572457	0.470242	0.214981	0.210788	0.219858	0.239483	0.230124	0.226442	0.219494	0.246299	0.283006	0.261129	0.212039	0.219988	0.235981	0.21647	0.202942	0.232995	0.246854	0.24902	0.24941	0.213815	0.19402	0.201725	0.245162
1082	239	239	375	375	0.763039	4275	1.02132	3.70588	-0.106061	131.244	311.489	0.00210526	1588.59	30.8235	0.0341058	0.00965082	0.700001	9.31384e-05	1595.44	31.0571	0.0350301	0.00967024	0.698759	9.35135e-05	0.996086	0.860884	0.135971	0.149675	0.157252	0.212858	0.183208	0.13455	0.118516	0.177642	0.17457	0.163425	0.1689	0.210457	0.186723	0.212976	0.239422	0.230889	0.188275	0.209093	0.252299	0.213582	0.193966	0.195232	0.226511
1050	239	239	372	372	0.753257	4329.5	1.01052	3.37333	-0.0136986	137.815	261.048	0	1678.2	32.12	0.0300436	0.00945113	0.683609	8.93239e-05	1693.95	32.2756	0.0328406	0.0094044	0.680156	8.84428e-05	0.079149	0.13362	0.179448	0.178407	0.182684	0.171451	0.144331	0.138247	0.159439	0.1976	0.201829	0.195334	0.20427	0.253993	0.223814	0.25074	0.321525	0.345388	0.283167	0.257043	0.260338	0.198636	0.183932	0.190646	0.193483
1031	266	266	393	391	0.759822	6355.5	1.21676	3.19588	-0.0105263	120.111	360.926	0.168358	897.436	22.9205	0.0476602	0.0115573	0.754123	0.000133571	871.432	22.7208	0.0472968	0.0115806	0.761625	0.00013411	0.286537	0.0038272	0.19673	0.196794	0.244575	0.289677	0.217664	0.240901	0.254824	0.298811	0.226401	0.227767	0.213625	0.224145	0.217197	0.264811	0.381146	0.429666	0.376458	0.326662	0.337409	0.28543	0.214103	0.231908	0.279031
976	251	250	396	395	0.697351	6954.5	3.27326	3.23148	0	128.676	348.284	0.0188367	1091.27	25.7	0.0400494	0.0105644	0.67402	0.000111607	1084.63	25.477	0.0410638	0.0105569	0.67653	0.000111448	0.398876	0.7101	0.087476	0.126123	0.170493	0.17849	0.152921	0.152739	0.184761	0.201012	0.212717	0.163905	0.132708	0.144514	0.14162	0.179479	0.225982	0.252392	0.219511	0.280439	0.295221	0.187991	0.133479	0.203719	0.256363
963	264	265	424	423	0.752194	11221.5	1.00671	3.96748	0	111.842	436.983	0.351825	1096.28	25.4315	0.0408485	0.0101134	0.718138	0.000102282	1080.09	25.305	0.0408302	0.0101619	0.722088	0.000103263	0.925132	0.977165	0.13376	0.163572	0.171616	0.180773	0.145808	0.177844	0.194771	0.217434	0.192232	0.209795	0.205719	0.221509	0.200517	0.208257	0.267389	0.288029	0.244383	0.242798	0.305903	0.241103	0.159934	0.172312	0.209816
980	261	263	416	415	0.75747	10145	1.06321	3.55046	0.00934579	115.917	384.763	0.265352	1062.34	25.1352	0.0419829	0.0104521	0.715081	0.000109247	1024.82	24.8139	0.0411394	0.0105322	0.725069	0.000110928	0.666625	0.139009	0.083076	0.120231	0.158039	0.191468	0.131586	0.150045	0.162395	0.185475	0.132145	0.151091	0.156672	0.153951	0.146772	0.162753	0.237344	0.233295	0.228028	0.237002	0.285814	0.181871	0.124767	0.180403	0.251428
1079	237	237	373	373	0.74872	3950	1.01008	3.35366	0.0125	128.375	324.685	0.0225316	1188.02	26.6052	0.0374881	0.010853	0.76705	0.000117788	1155.92	26.3309	0.039478	0.0109578	0.773503	0.000120074	0.542636	0.0725455	0.082533	0.071203	0.092206	0.103862	0.112248	0.128791	0.160775	0.184814	0.180576	0.17413	0.183635	0.20187	0.177628	0.20952	0.27797	0.297893	0.270908	0.264458	0.274809	0.190614	0.154025	0.219789	0.272762
939	253	253	402	403	0.749814	7809	1.05483	3.64545	0.0277778	119.744	405.167	0.20041	1212.92	26.8395	0.0390215	0.0100884	0.746216	0.000101776	1188.87	26.5324	0.040066	0.0100775	0.751321	0.000101555	0.669314	0.827821	0.173005	0.185286	0.182874	0.231445	0.190639	0.138877	0.142305	0.203187	0.222915	0.174538	0.148214	0.171544	0.196999	0.243444	0.270265	0.248729	0.204047	0.230431	0.262169	0.189905	0.15244	0.150104	0.172025
958	294	294	430	427	0.772116	12661.5	1.00963	3.46099	-0.00719424	112.869	489.296	0.380603	760.078	21.3773	0.0481623	0.0125358	0.753724	0.000157146	786.325	21.5473	0.047951	0.0125587	0.745196	0.000157722	0.69553	0.686464	0.154661	0.166361	0.200631	0.230798	0.192581	0.156608	0.165272	0.197044	0.165977	0.151744	0.180835	0.211372	0.182797	0.242161	0.295393	0.264502	0.209223	0.238607	0.282193	0.205111	0.16792	0.219154	0.271555
1040	260	259	415	415	0.771269	9722.5	1.01646	3.5283	-0.0192308	111.872	408.598	0.351556	1160.85	26.2276	0.0397077	0.0102283	0.770774	0.000104618	1152.33	26.2119	0.0386574	0.0101702	0.772544	0.000103432	0.765096	0.173178	0.155699	0.188309	0.206462	0.23108	0.202773	0.148005	0.121759	0.180005	0.204421	0.223214	0.2292	0.237515	0.188304	0.236918	0.322212	0.342528	0.258247	0.299711	0.34762	0.25032	0.163014	0.240134	0.302259
988	258	259	406	404	0.781308	8069	1.02664	3.43243	-0.0277778	124.296	367.965	0.117115	1485.85	29.9041	0.0332484	0.0090694	0.707792	8.2254e-05	1412.55	29.1484	0.0337932	0.00914447	0.722114	8.36213e-05	0.384838	0.965431	0.163302	0.190058	0.190808	0.206551	0.186727	0.146426	0.111714	0.134218	0.156261	0.180856	0.191008	0.204674	0.186698	0.216598	0.252407	0.254828	0.246913	0.274911	0.29061	0.232441	0.213171	0.22908	0.247392
1006	247	248	394	391	0.709614	6401.5	1.09919	2.96739	0.0555556	128.768	348.568	0.0184332	1393.78	28.9452	0.0361159	0.00970446	0.711225	9.41766e-05	1383.68	28.7413	0.0368176	0.00970147	0.713198	9.41185e-05	0.564359	0.858339	0.171941	0.195226	0.191386	0.184881	0.161322	0.139387	0.163091	0.21573	0.187893	0.190953	0.22964	0.266608	0.202447	0.237255	0.289586	0.291864	0.238663	0.308241	0.31171	0.229561	0.149177	0.226613	0.260876
974	247	247	390	389	0.758712	6113.5	1.01834	3.36957	-0.0888889	124.102	364.055	0.0898013	1354.49	28.5742	0.0370778	0.00976764	0.751022	9.54067e-05	1378.36	28.7652	0.03854	0.00977553	0.746624	9.55609e-05	0.691702	0.825916	0.150697	0.148713	0.160158	0.206111	0.137382	0.087016	0.116451	0.214637	0.226764	0.18715	0.168948	0.189917	0.191008	0.1711	0.156977	0.166162	0.209331	0.302951	0.309981	0.228417	0.163011	0.22134	0.272996
173	1119	1122	1645	1630	0.735117	1.39118e+06	1.00472	3.73718	-0.000802568	42.1608	263.858	0.976599	96.8006	7.26606	0.149052	0.0418153	0.601404	0.00174852	96.4302	7.2361	0.149506	0.0418792	0.602984	0.00175387	0.411569	0.953355	0.065868	0.085039	0.086322	0.108751	0.096127	0.093308	0.118232	0.153862	0.154372	0.124238	0.126683	0.135327	0.153039	0.147565	0.150049	0.127918	0.117244	0.121826	0.143378	0.167308	0.164334	0.167643	0.162868
174	1117	1121	1644	1629	0.723625	1389280	1.00331	3.60537	0.00158103	42.0965	264.295	0.976797	84.4977	6.78318	0.158393	0.0447442	0.600944	0.00200205	84.5284	6.75864	0.159009	0.0448105	0.600839	0.00200798	0.481026	0.30865	0.113726	0.104418	0.106268	0.154271	0.153566	0.140259	0.178429	0.225876	0.187801	0.150927	0.168505	0.208188	0.204225	0.213971	0.212561	0.143968	0.102974	0.166951	0.249999	0.229015	0.183311	0.174956	0.163791
175	957	1057	1876	1660	0.669623	1698882	2.02858	3.59797	-0.00290698	54.6115	285.201	0.965208	153.954	9.01358	0.12177	0.0352736	0.634945	0.00124423	151.64	8.9587	0.122237	0.0353243	0.640382	0.00124781	0.181629	0.548634	0.088512	0.104761	0.092881	0.108147	0.111383	0.108209	0.133726	0.160233	0.145212	0.121655	0.146295	0.147053	0.132217	0.12238	0.14385	0.115868	0.098814	0.108235	0.127349	0.12326	0.124697	0.121145	0.099713
176	963	966	1368	1378	0.713117	905234	1.01868	3.52799	-0.000967118	48.1505	322.527	0.978994	201.02	10.5312	0.105536	0.0284586	0.584	0.000809894	200.032	10.4974	0.106146	0.0285088	0.586075	0.000812752	0.321319	0.146813	0.064696	0.078335	0.086998	0.119702	0.116806	0.116129	0.128793	0.162998	0.153486	0.140967	0.157451	0.175682	0.163655	0.158151	0.165433	0.131243	0.093525	0.144574	0.189466	0.182779	0.155804	0.164686	0.142954
177	988	988	1462	1462	0.709094	1.0464e+06	1.00577	3.55795	0	43.9215	301.131	0.971667	148.706	8.99465	0.122763	0.033636	0.59317	0.00113138	146.555	8.93626	0.123471	0.0337075	0.599119	0.00113619	0.845533	0.436895	0.086996	0.090158	0.089529	0.126467	0.128045	0.114981	0.117626	0.152519	0.129577	0.11687	0.141867	0.164999	0.145015	0.130949	0.145683	0.127453	0.108298	0.121448	0.161192	0.179886	0.163686	0.142027	0.117988
178	516	524	787	763	0.654784	170600	1.05886	3.63288	-0.00226244	61.4792	708.452	0.871263	672.79	19.6186	0.0563699	0.0143053	0.573345	0.000204642	664.884	19.5253	0.0566986	0.0143141	0.578609	0.000204894	0.186904	0.261121	0.112558	0.122732	0.122535	0.120601	0.135818	0.133699	0.143387	0.172343	0.137708	0.105468	0.112883	0.155214	0.134381	0.12662	0.135366	0.111996	0.086975	0.13153	0.185362	0.190739	0.145471	0.127744	0.092815
179	1427	1459	2062	2080	0.710452	2470110	1.02183	3.56542	-0.000592768	49.3487	176.73	0.979355	204.843	10.353	0.107301	0.0312421	0.68934	0.000976068	203.458	10.309	0.107842	0.0312878	0.691468	0.000978928	0.417291	0.3488	0.066257	0.084923	0.082617	0.079758	0.087485	0.093447	0.115652	0.130735	0.10529	0.083054	0.101792	0.128591	0.123432	0.12419	0.137922	0.118283	0.082395	0.108394	0.141317	0.123611	0.105768	0.127629	0.128214
180	1212	1206	1710	1713	0.71863	1554579	3.14854	3.52889	0.00074184	44.7456	272.74	0.973598	135.679	8.54819	0.129289	0.0358403	0.592786	0.00128453	135.775	8.53496	0.129752	0.0358878	0.59251	0.00128793	0.989035	0.803366	0.11954	0.169515	0.150824	0.132826	0.132866	0.130991	0.147802	0.164624	0.142859	0.128142	0.144846	0.149809	0.15765	0.177832	0.189174	0.109623	0.068997	0.148371	0.223275	0.211679	0.1667	0.170908	0.132459
181	1091	1087	1728	1722	0.655706	1599503	1.01546	3.65199	0.000723066	48.8714	333.756	0.959672	70.8507	6.14717	0.172712	0.0503383	0.544192	0.00253395	70.2737	6.12238	0.173688	0.0504164	0.547946	0.00254182	0.2366	0.80323	0.079126	0.095573	0.076328	0.075051	0.081963	0.088803	0.101667	0.137015	0.117344	0.092279	0.084532	0.118489	0.126287	0.135636	0.130309	0.096802	0.072321	0.11022	0.157325	0.159133	0.124617	0.119283	0.107207
182	1160	1157	1649	1660	0.664951	1.43815e+06	1.04114	3.66422	-0.00220264	48.7245	357.014	0.955558	242.635	11.6423	0.0957969	0.0257427	0.469743	0.000662685	241.406	11.6044	0.096109	0.0257791	0.472419	0.00066456	0.916832	0.704506	0.072557	0.071924	0.073163	0.11436	0.118066	0.103245	0.112159	0.151674	0.132747	0.103188	0.123003	0.151805	0.14934	0.133605	0.117997	0.082513	0.076081	0.109388	0.133385	0.118721	0.118626	0.129889	0.130388
341	263	264	410	409	0.658602	9861	1.00073	3.20635	-0.0645161	142.638	252.369	0.00010141	967.981	24.3145	0.0417873	0.0118367	0.407849	0.000140108	977.689	24.3487	0.0427338	0.0118132	0.401138	0.000139552	0.980582	0.0216027	0.117236	0.098063	0.120268	0.163988	0.179977	0.158199	0.137659	0.158175	0.160387	0.127535	0.144891	0.168884	0.186562	0.160195	0.150451	0.106857	0.119293	0.148846	0.161943	0.136598	0.113843	0.091084	0.095465
367	263	262	411	410	0.702223	9616.5	1.00478	3.56989	-0.0769231	136.95	212.216	0	1940.44	34.5655	0.02884	0.00888201	0.425285	7.88901e-05	1914.56	34.3428	0.0282161	0.00892186	0.432391	7.95996e-05	0.236462	0.268314	0.176655	0.262861	0.203373	0.154933	0.128464	0.181433	0.190948	0.256553	0.239075	0.181608	0.163502	0.178647	0.199348	0.174703	0.187008	0.188871	0.161859	0.144942	0.142162	0.180997	0.147097	0.091109	0.067896
358	269	269	421	419	0.731544	10742	1.00521	3.62857	-0.00970874	134.629	294.634	0.000930925	1962.52	34.6868	0.0302928	0.00858687	0.521586	7.37343e-05	1954.93	34.5326	0.0311668	0.00862227	0.523233	7.43436e-05	0.191007	0.391699	0.184519	0.20831	0.205741	0.203631	0.164501	0.146446	0.161753	0.216264	0.2141	0.18436	0.152126	0.125972	0.152352	0.199944	0.231039	0.205483	0.190918	0.214661	0.202009	0.185999	0.141073	0.138842	0.118476
373	260	258	401	405	0.54768	9734	2.02527	3.83471	0	140.305	147.87	0	2271.33	37.4959	0.0272313	0.00884551	0.267532	7.82431e-05	2292.64	37.6782	0.0266243	0.0088497	0.25967	7.83173e-05	0.634442	0.951662	0.152544	0.180732	0.175708	0.184225	0.174134	0.18465	0.184538	0.219315	0.19988	0.148596	0.160154	0.221255	0.251716	0.214814	0.18808	0.158179	0.136755	0.1694	0.206309	0.203536	0.148662	0.110633	0.128771
345	272	273	429	429	0.636296	12738	1.00658	3.49231	0.0078125	145.209	204.806	0	1840.9	33.5823	0.0302258	0.00890752	0.440659	7.93439e-05	1830.57	33.4444	0.0308215	0.00891838	0.443487	7.95374e-05	0.484909	0.893047	0.161936	0.158287	0.112519	0.150298	0.175935	0.151053	0.118077	0.143516	0.161036	0.118887	0.141524	0.179134	0.201648	0.150505	0.141948	0.126998	0.124061	0.128089	0.134146	0.114466	0.100159	0.094059	0.108565
376	294	284	406	410	0.664147	8997	1.07077	3.48113	0	149.235	196.798	0	1548.94	30.7011	0.0336178	0.00974316	0.412341	9.49291e-05	1570.89	30.9267	0.0337356	0.00970554	0.403562	9.41976e-05	0.00594284	0.85703	0.152173	0.141343	0.137985	0.209736	0.232174	0.214534	0.190177	0.242556	0.245406	0.200218	0.187565	0.241234	0.256486	0.198331	0.161512	0.168463	0.167118	0.1646	0.170411	0.186644	0.155213	0.126691	0.126175
354	256	257	403	398	0.616957	8200.5	1.04237	4.00901	-0.00917431	156.553	192.333	0	1303.58	28.2825	0.0356247	0.0106021	0.384294	0.000112404	1265.99	27.7732	0.0376508	0.0106757	0.401304	0.000113971	0.208248	0.675941	0.182451	0.162386	0.144703	0.169269	0.186944	0.143439	0.165366	0.186836	0.237557	0.187643	0.210019	0.204757	0.228663	0.182532	0.184928	0.176181	0.195224	0.223497	0.234463	0.193556	0.135667	0.131438	0.161651
353	266	267	417	417	0.684978	10420	1.69518	4.05825	0.00990099	141.955	221.54	0	2250.3	37.104	0.0279176	0.0084072	0.418343	7.0681e-05	2269.22	37.3138	0.027904	0.00842076	0.411785	7.09093e-05	0.798846	0.693224	0.137404	0.131653	0.163976	0.192538	0.186342	0.170378	0.190618	0.193315	0.170222	0.105127	0.139011	0.142627	0.168413	0.158927	0.251547	0.248347	0.185079	0.166188	0.188718	0.17878	0.125833	0.090655	0.084337
360	283	284	422	419	0.710553	10860	1.01316	3.69298	0.0178571	129.91	312.879	0.0279926	1599.33	31.3527	0.0322456	0.00893794	0.577151	7.98867e-05	1632.28	31.6132	0.0318707	0.0088979	0.5679	7.91726e-05	0.65075	0.574674	0.15654	0.163227	0.151017	0.14614	0.133542	0.105911	0.12344	0.189837	0.17509	0.123719	0.126986	0.166148	0.187122	0.17618	0.178484	0.164651	0.1437	0.124317	0.126248	0.119453	0.110709	0.092159	0.082395
347	262	263	410	411	0.626753	9588	1.01499	3.50962	0.0588235	152.274	208.638	0	1869.59	33.8969	0.030788	0.00917231	0.400562	8.41313e-05	1873.1	34.0337	0.0297338	0.00916376	0.398067	8.39744e-05	0.375186	0.274669	0.124674	0.133988	0.135511	0.162668	0.140988	0.14221	0.144806	0.194961	0.174394	0.098295	0.123585	0.145908	0.183519	0.172755	0.258367	0.223604	0.165183	0.136031	0.155512	0.13448	0.099422	0.09518	0.113331
340	275	277	422	421	0.68518	11513.5	1.01024	3.7551	0.0208333	143.441	229.413	0	1990.16	34.9308	0.0288152	0.00872074	0.429889	7.60513e-05	1934.69	34.5408	0.0294446	0.00874365	0.44543	7.64514e-05	0.301947	0.248798	0.152893	0.157645	0.170892	0.186502	0.174282	0.163216	0.152098	0.165963	0.163983	0.167901	0.165252	0.14233	0.154373	0.193969	0.2377	0.193568	0.172565	0.159799	0.154057	0.125186	0.133947	0.159761	0.145604
332	276	274	419	420	0.636938	11097	1.85072	3.88889	0	146.498	207.36	0	1301.41	28.3154	0.0360335	0.0103378	0.461574	0.00010687	1344.64	28.6599	0.0352897	0.0103072	0.442892	0.000106239	0.313669	0.621845	0.128504	0.144857	0.1801	0.21578	0.19483	0.142341	0.156374	0.226337	0.21102	0.125228	0.137725	0.186265	0.205348	0.186528	0.274137	0.258604	0.187755	0.168588	0.174261	0.172391	0.126889	0.104288	0.078416
365	265	265	413	412	0.654101	10452	1.00575	3.51351	0	145.375	249.265	0	2123.59	36.2662	0.0273566	0.00859275	0.414132	7.38353e-05	2103.79	35.9352	0.02855	0.00860738	0.418274	7.4087e-05	0.0674486	0.956994	0.114185	0.14469	0.160825	0.172475	0.151423	0.133826	0.118936	0.146455	0.152935	0.139738	0.148785	0.170783	0.187779	0.180592	0.218037	0.186513	0.111835	0.093694	0.129319	0.157588	0.113638	0.086511	0.070608
336	275	276	418	416	0.686634	10522.5	1.00873	3.65789	0.0267857	147.711	211.887	0	2179.11	36.6205	0.0279762	0.00846265	0.439519	7.16165e-05	2206.59	36.7647	0.0285434	0.00846853	0.432173	7.17159e-05	0.23825	0.0588818	0.146241	0.168212	0.181582	0.227946	0.210189	0.167761	0.152776	0.206647	0.204567	0.140527	0.144003	0.202687	0.248638	0.223815	0.25678	0.249025	0.215423	0.182132	0.180189	0.159534	0.124169	0.084657	0.093465
331	260	260	412	414	0.629671	9673.5	1.02496	3.78	0.0204082	133.731	231.638	0.00103375	1988.52	35.0855	0.029605	0.00877087	0.385084	7.69282e-05	2028.49	35.3196	0.029169	0.00876111	0.3722	7.67571e-05	0.502216	0.452526	0.129382	0.1689	0.168992	0.159497	0.14193	0.120529	0.107068	0.153201	0.156014	0.139616	0.107344	0.102923	0.154139	0.200247	0.212567	0.17123	0.131749	0.135287	0.146338	0.148991	0.110783	0.067947	0.052977
334	270	268	416	414	0.636215	10248	1.01616	3.384	-0.0243902	150.957	206.535	0	1950.96	34.5091	0.029547	0.00897039	0.420509	8.04678e-05	1896.93	34.0681	0.0316913	0.00902161	0.435506	8.13895e-05	0.241686	0.51802	0.222368	0.246478	0.243467	0.224202	0.193664	0.163557	0.213491	0.279276	0.247119	0.153226	0.193976	0.190516	0.211485	0.20178	0.33217	0.263791	0.173175	0.157342	0.204585	0.171508	0.115972	0.116471	0.135048
369	258	259	413	408	0.67505	9939.5	1.04281	3.25758	-0.00769231	139.386	208.607	0	1898.23	34.1829	0.0293443	0.00885055	0.440152	7.83323e-05	1850.99	33.6814	0.0293525	0.00885252	0.454821	7.83672e-05	0.214012	0.242091	0.149396	0.195973	0.19425	0.197564	0.171724	0.156139	0.170621	0.212145	0.196044	0.140537	0.147409	0.18151	0.194215	0.155601	0.139309	0.137326	0.148027	0.155486	0.144057	0.123239	0.112492	0.094746	0.105816
374	269	269	420	422	0.607613	11021	1.01435	3.61468	-0.00934579	130.253	183.324	0.00244987	2305.76	37.7133	0.0269078	0.00849689	0.354138	7.21972e-05	2328.29	37.844	0.0277479	0.00848839	0.347524	7.20527e-05	0.281235	0.0898544	0.147301	0.128584	0.120851	0.161312	0.183566	0.188391	0.177234	0.17882	0.167267	0.151741	0.170187	0.168034	0.201838	0.205694	0.219912	0.176738	0.144505	0.163134	0.179642	0.168374	0.096688	0.092966	0.106506
375	269	309	419	419	0.694482	10631	1.08121	3.32184	0.0941176	148.009	195.189	0	1856.15	33.8624	0.0291534	0.00888961	0.419303	7.90253e-05	1865.29	33.9415	0.0301604	0.00891647	0.414901	7.95035e-05	0.362277	0.0640743	0.11137	0.121524	0.128829	0.109905	0.102034	0.124539	0.155509	0.165902	0.148146	0.08617	0.103442	0.100966	0.161152	0.168767	0.210888	0.174768	0.16013	0.18074	0.190593	0.146471	0.122107	0.104807	0.081142
343	281	279	419	418	0.653038	10734.5	1.00216	3.33051	-0.0172414	144.55	250.259	0	1899.61	34.2154	0.0307652	0.00891941	0.426872	7.95559e-05	1910.86	34.3122	0.0300026	0.00891679	0.422209	7.95091e-05	0.626309	0.849248	0.077448	0.087628	0.109403	0.119709	0.098366	0.08484	0.108579	0.141877	0.119661	0.092629	0.092805	0.110393	0.115184	0.115314	0.151926	0.12543	0.09809	0.095512	0.119911	0.100754	0.066071	0.047121	0.030558
337	266	265	415	415	0.672156	10390	1.01324	3.81818	-0.00925926	146.844	252.09	0	2024.03	35.2953	0.0291217	0.00870816	0.452979	7.58321e-05	2030.93	35.3118	0.0289787	0.00871595	0.449993	7.59677e-05	0.807791	0.115285	0.109504	0.112018	0.138709	0.163279	0.152518	0.136952	0.137581	0.193021	0.182043	0.114089	0.11574	0.184411	0.209907	0.17462	0.213939	0.199094	0.153474	0.116631	0.133642	0.137139	0.11713	0.091717	0.094367
344	267	266	413	413	0.663017	10057	1.01217	3.50877	0	150.516	204.791	0	2121.3	36.1199	0.0287093	0.00868776	0.400205	7.54771e-05	2087.73	35.9683	0.0278508	0.0087243	0.409245	7.61135e-05	0.00554541	0.536696	0.141073	0.163035	0.166481	0.158776	0.113476	0.109445	0.155488	0.220812	0.212316	0.137338	0.162216	0.200955	0.240589	0.202454	0.236175	0.20479	0.185016	0.177281	0.189684	0.176476	0.147225	0.134699	0.127801
352	263	265	416	413	0.630256	10152	1.05523	3.60909	0.0277778	146.873	179.514	0	2187.48	36.5211	0.0285909	0.0086733	0.384785	7.52261e-05	2162.78	36.2078	0.0294381	0.00867826	0.391232	7.53122e-05	0.798923	0.0802858	0.148305	0.191405	0.210551	0.212736	0.191855	0.151862	0.161525	0.214258	0.224469	0.145839	0.164351	0.169641	0.18368	0.215161	0.321409	0.261736	0.199165	0.177975	0.218558	0.21496	0.176163	0.104295	0.084021
362	272	274	422	422	0.684263	11483	1.00479	3.63934	0.00833333	143.483	234.17	0	1906.84	34.227	0.0299124	0.00875268	0.452518	7.66094e-05	1928.72	34.5171	0.0289889	0.00874143	0.445414	7.64125e-05	0.0252424	0.724963	0.168218	0.166618	0.163353	0.168809	0.174055	0.154097	0.17616	0.179507	0.18066	0.145948	0.158306	0.177669	0.193651	0.169117	0.173006	0.18648	0.158288	0.158228	0.144913	0.157198	0.125719	0.120298	0.115269
359	259	261	406	403	0.617693	8974	1.04353	3.55556	-0.00943396	152.731	205.199	0	2004.58	35.2168	0.0295465	0.00897995	0.397182	8.06396e-05	2000.64	35.1361	0.0293282	0.00899732	0.396522	8.09517e-05	0.967494	0.308764	0.169809	0.177778	0.186519	0.204411	0.170037	0.160091	0.177718	0.189447	0.161487	0.129666	0.125259	0.124655	0.175433	0.20381	0.20692	0.190461	0.150082	0.182731	0.182865	0.194392	0.139954	0.149375	0.16722
328	285	286	418	417	0.712663	10665.5	1.01994	3.69	0.0102041	134.061	290.636	0.000562562	1470.54	30.0126	0.0345047	0.00959913	0.541767	9.21432e-05	1435.24	29.5186	0.0354164	0.00963941	0.552767	9.29182e-05	0.918397	0.123639	0.159707	0.184432	0.166804	0.177863	0.192809	0.20127	0.189372	0.189362	0.181773	0.170467	0.160106	0.167545	0.175985	0.179392	0.180724	0.189301	0.168853	0.137577	0.111533	0.129467	0.143087	0.138936	0.121105
372	255	253	401	405	0.636296	8001.5	1.04631	3.49515	0.0594059	136.698	190.225	0	1908.15	34.4801	0.0297544	0.0091688	0.349375	8.4067e-05	1953.51	34.7715	0.0291579	0.00914397	0.333839	8.36121e-05	0.30061	0.934502	0.096943	0.118073	0.121121	0.137275	0.129686	0.117069	0.120973	0.161046	0.174341	0.150297	0.169477	0.145136	0.15096	0.175677	0.260845	0.192468	0.134109	0.147551	0.195213	0.164288	0.099596	0.086124	0.069913
355	259	261	408	406	0.618844	8784.5	1.12797	3.35789	-0.0430108	152.424	220.743	0	1724.92	32.5918	0.0298353	0.00948887	0.378635	9.00387e-05	1731.44	32.6949	0.0315826	0.00949881	0.375009	9.02274e-05	0.443368	0.166744	0.116946	0.163352	0.145489	0.140799	0.125982	0.1646	0.181685	0.214188	0.198347	0.133397	0.129312	0.131528	0.161859	0.146309	0.164512	0.144733	0.134659	0.151877	0.165241	0.121908	0.089515	0.073896	0.072006
361	268	268	420	420	0.66974	11419	1.01036	3.69106	0.0578512	146.2	234.927	0	961.912	23.9398	0.0431143	0.0119378	0.475388	0.000142512	954.574	23.9095	0.0429514	0.0119524	0.479881	0.000142859	0.86546	0.972517	0.115245	0.114702	0.12701	0.124506	0.125991	0.121043	0.113127	0.170544	0.169864	0.155462	0.116231	0.12548	0.146469	0.160617	0.159994	0.139981	0.1271	0.151139	0.165198	0.138087	0.102945	0.078878	0.079479
333	273	272	423	424	0.617761	11551	1.0081	3.728	0.00813008	144.253	214.658	0	1759.38	32.8247	0.0312765	0.00919043	0.440217	8.4464e-05	1742.96	32.7207	0.030523	0.00918399	0.444626	8.43456e-05	0.0473395	0.0183091	0.152871	0.190495	0.158474	0.145499	0.11424	0.130615	0.137444	0.159282	0.136009	0.116404	0.152289	0.18238	0.18784	0.152256	0.180894	0.148235	0.137725	0.136606	0.156691	0.155712	0.136876	0.10476	0.073527
357	268	266	415	412	0.654861	9805	1.04638	3.62745	0	145.073	267.117	0	1602.92	31.5475	0.0334084	0.00929336	0.479054	8.63666e-05	1609.29	31.5578	0.0326221	0.00929659	0.475888	8.64266e-05	0.41052	0.91239	0.12751	0.183085	0.210455	0.163425	0.159543	0.16349	0.146589	0.146889	0.143887	0.143899	0.130277	0.146392	0.165263	0.173108	0.168984	0.152799	0.165406	0.179466	0.182994	0.175259	0.131707	0.092774	0.055012
339	261	263	433	434	0.645733	13671.5	1.00476	3.64912	0.0535714	135.849	229.359	0	1525.79	30.4638	0.0331324	0.00945648	0.477336	8.94249e-05	1501.18	30.3042	0.0333421	0.00948225	0.485303	8.99131e-05	0.0432229	0.944459	0.345135	0.368101	0.360888	0.357074	0.349797	0.320104	0.315397	0.380382	0.33304	0.244081	0.271621	0.304185	0.341333	0.308784	0.341855	0.258935	0.23007	0.284627	0.313492	0.292185	0.202534	0.210378	0.23285
364	265	266	418	418	0.677042	10621.5	1.00974	3.93069	0	143.738	267.245	0	1758.03	32.7374	0.0308863	0.00916217	0.467844	8.39454e-05	1728.07	32.5217	0.0314485	0.00915358	0.475855	8.3788e-05	0.502071	0.768583	0.107097	0.147357	0.162037	0.156338	0.130608	0.116907	0.121812	0.168867	0.159102	0.122616	0.132191	0.157026	0.183539	0.153377	0.153483	0.125498	0.112202	0.117209	0.134365	0.13486	0.098391	0.075629	0.080118
329	271	270	422	422	0.65998	11388.5	1.00432	3.51587	0.00806452	141.194	219.36	0	1952.05	34.4463	0.0298213	0.00870927	0.502822	7.58514e-05	1943.17	34.4889	0.030215	0.00875121	0.504763	7.65837e-05	0.0912963	0.284025	0.172618	0.197045	0.168254	0.151803	0.179497	0.176708	0.164603	0.175146	0.167427	0.143248	0.133325	0.122288	0.163194	0.224967	0.29218	0.226051	0.171038	0.185478	0.243972	0.213136	0.124549	0.115574	0.120929
349	265	265	415	416	0.63038	10351	1.02033	3.54478	0.00757576	145.498	206.384	0	1978.37	34.905	0.029458	0.00875853	0.446478	7.67118e-05	1990.82	35.0595	0.0305674	0.00876548	0.442416	7.68337e-05	0.461909	0.583432	0.154626	0.178961	0.174267	0.187886	0.155539	0.136471	0.141589	0.185153	0.170786	0.129393	0.096189	0.092981	0.146433	0.214904	0.302819	0.256882	0.180891	0.148817	0.167609	0.159283	0.124747	0.117986	0.106327
330	261	260	415	414	0.635204	9678	1.01705	3.77686	-0.0168067	134.001	224.338	0.00134325	1891.14	34.2138	0.0302063	0.00888072	0.384728	7.88672e-05	1942.87	34.828	0.029058	0.00884465	0.365762	7.82279e-05	0.463653	0.939296	0.092475	0.098472	0.098747	0.10426	0.101962	0.09816	0.112936	0.11877	0.129449	0.10776	0.133286	0.138946	0.161842	0.134083	0.119896	0.068327	0.072692	0.098266	0.110245	0.084062	0.062138	0.04808	0.047907
371	262	261	409	411	0.613983	9539.5	1.09395	3.59459	0.0733945	140.631	156.007	0	2022.99	35.351	0.0290869	0.00910073	0.298302	8.28233e-05	2022.81	35.4362	0.0287332	0.00916001	0.294829	8.39058e-05	0.23248	0.208263	0.124306	0.131079	0.130122	0.150747	0.137143	0.142276	0.143066	0.200396	0.19691	0.136966	0.124909	0.136489	0.190062	0.199033	0.248593	0.184451	0.132907	0.137437	0.169921	0.161957	0.110942	0.120998	0.092457
363	271	270	424	424	0.661322	11902	1.00991	4.00794	0.00806452	145.069	226.167	0	1922.79	34.2931	0.0290614	0.00869916	0.477708	7.56754e-05	1933.87	34.5473	0.0296682	0.00867258	0.474172	7.52137e-05	0.266906	0.790063	0.130922	0.146294	0.167377	0.196359	0.190919	0.170956	0.173434	0.211734	0.204776	0.163618	0.178942	0.200575	0.228771	0.234602	0.295902	0.224179	0.196718	0.160282	0.203962	0.188828	0.186971	0.162511	0.1441
351	266	268	416	414	0.625447	10270	1.01076	3.56522	-0.00884956	145.038	247.164	0	1785.9	33.2957	0.0302326	0.00896957	0.484085	8.04531e-05	1781.95	33.2195	0.0305332	0.00897596	0.484193	8.05678e-05	0.341831	0.606401	0.147213	0.152889	0.135937	0.119095	0.122756	0.133812	0.184372	0.243175	0.213277	0.127806	0.156471	0.209686	0.230567	0.178331	0.171941	0.119708	0.1139	0.130496	0.143475	0.130468	0.114976	0.085688	0.0776
368	259	262	414	411	0.724448	9421	1.04356	3.80851	-0.0652174	129.526	263.34	0.0143297	2077.81	35.534	0.0292778	0.00838498	0.504608	7.0308e-05	2002.16	34.9215	0.0289755	0.00842738	0.522025	7.10208e-05	0.374292	0.231301	0.097597	0.110873	0.141676	0.14176	0.104627	0.090915	0.145056	0.217227	0.220947	0.132802	0.11678	0.136963	0.171384	0.159755	0.246349	0.225234	0.159751	0.139184	0.159661	0.161494	0.120731	0.109158	0.102501
338	268	266	419	418	0.617768	10916	1.01193	3.33858	0.064	149.641	198.8	0	2051.19	35.4137	0.0312778	0.00878729	0.413049	7.72165e-05	2023.65	35.21	0.0285503	0.0087821	0.420532	7.71253e-05	0.894978	0.368369	0.190894	0.216019	0.194592	0.168555	0.169871	0.171674	0.16916	0.191863	0.193362	0.164123	0.17568	0.191311	0.210345	0.182145	0.163008	0.113424	0.115456	0.155629	0.177884	0.16441	0.13144	0.080621	0.062739
350	260	262	408	403	0.692201	8201.5	1.05215	3.39091	0.0648148	137.492	258.075	0.000121929	1797.49	33.1785	0.0317761	0.00895872	0.501476	8.02587e-05	1760.66	32.9654	0.0309626	0.00898741	0.511393	8.07735e-05	0.963004	0.887389	0.191691	0.206324	0.216926	0.210313	0.215829	0.194887	0.199781	0.234371	0.236262	0.174678	0.188615	0.180893	0.212046	0.190557	0.214415	0.12742	0.13664	0.191977	0.223195	0.178093	0.136043	0.106247	0.087322
346	269	270	402	403	0.640858	8636.5	1.03697	3.72115	-0.00980392	147.517	201.747	0	1896.1	34.1885	0.030323	0.00911302	0.418089	8.30471e-05	1903.45	34.1512	0.0309581	0.0091308	0.414372	8.33716e-05	0.988329	0.179034	0.1343	0.134253	0.136215	0.181647	0.183614	0.159808	0.146261	0.160873	0.139494	0.12717	0.173977	0.199794	0.210051	0.185863	0.185059	0.137948	0.166479	0.192995	0.196852	0.164215	0.146243	0.101355	0.05978
377	269	268	424	423	0.65995	11748.5	1.0025	3.70536	0	147.481	212.429	0	1974.32	34.8021	0.0285071	0.0087535	0.437831	7.66238e-05	1950.09	34.5484	0.0302137	0.00877552	0.44405	7.70098e-05	0.365719	0.563742	0.191951	0.190366	0.162834	0.174486	0.160601	0.163386	0.190402	0.23488	0.210983	0.136312	0.157988	0.206279	0.229288	0.193104	0.251527	0.217729	0.162381	0.145837	0.207358	0.189304	0.161655	0.13718	0.13295
348	269	268	408	407	0.701226	9029	1.21859	3.23077	-0.011236	153.108	193.106	0	1551.41	30.7911	0.0327855	0.00991535	0.437278	9.83141e-05	1539.58	30.7846	0.032074	0.00993886	0.441046	9.8781e-05	0.0970382	0.0204497	0.156308	0.129615	0.174549	0.230026	0.222377	0.175802	0.182936	0.219687	0.207505	0.13186	0.158056	0.175943	0.198092	0.177628	0.298825	0.262987	0.208625	0.174232	0.224243	0.19209	0.157304	0.123434	0.103089
335	265	264	414	414	0.604949	10419	1.09788	3.52632	0	151.457	198.771	0	2225.74	36.9569	0.0284456	0.00854891	0.408701	7.30839e-05	2219.94	36.8923	0.0274146	0.00854492	0.409067	7.30156e-05	0.0955296	0.689143	0.14962	0.16479	0.156029	0.190296	0.194475	0.200307	0.205056	0.183214	0.169571	0.136177	0.192343	0.186328	0.230042	0.198027	0.208206	0.157862	0.144806	0.15062	0.16122	0.13437	0.126176	0.132098	0.12471
370	263	263	419	419	0.680989	10865	1.58227	4.19792	0.0212766	136.85	194.869	0	1625.81	31.6466	0.0318392	0.0094502	0.432636	8.93063e-05	1706.99	32.3937	0.0312341	0.00940317	0.403444	8.84197e-05	0.105446	0.212935	0.1866	0.228985	0.21756	0.208669	0.193503	0.203989	0.219322	0.240952	0.195448	0.14515	0.162844	0.216116	0.244805	0.240829	0.279713	0.267433	0.203181	0.172808	0.185146	0.175355	0.158857	0.14025	0.126212
342	271	272	418	417	0.648808	10374	1.41384	3.30508	0	130.921	306.768	0.0108926	1622.24	31.5857	0.0321883	0.00912819	0.532206	8.33238e-05	1606.07	31.4356	0.033229	0.00911236	0.536319	8.30351e-05	0.539505	0.809278	0.153482	0.169464	0.15578	0.143322	0.150786	0.157757	0.17296	0.215347	0.184681	0.130549	0.141283	0.158367	0.176243	0.158108	0.165441	0.110758	0.122473	0.161583	0.166329	0.132534	0.098365	0.077872	0.054688
95	1034	1008	1257	1248	0.130013	556689	1.75538	3.66289	0.00252366	112.521	451.776	0.286666	186.441	10.5815	0.0934434	0.0297527	0.223723	0.000885223	184.34	10.5274	0.0937989	0.0297837	0.232813	0.000887066	0.721184	0.852417	0.074341	0.111562	0.126221	0.125291	0.108397	0.083486	0.068559	0.084039	0.086772	0.099199	0.110052	0.093519	0.068957	0.082244	0.103382	0.093958	0.069481	0.109284	0.115738	0.118565	0.053766	0.075468	0.082032
191	974	948	1357	1319	0.138375	661949	1.08452	3.70029	0.003544	92.8478	503.08	0.554884	658.615	20.0634	0.0511447	0.015537	0.15275	0.000241399	654.789	20.0071	0.0510863	0.0155518	0.157109	0.000241859	0.453089	0.831168	0.129484	0.140409	0.128664	0.116991	0.119598	0.123101	0.14655	0.169286	0.150199	0.123288	0.129511	0.145504	0.141029	0.14758	0.16708	0.125105	0.096742	0.121358	0.160712	0.14745	0.120719	0.111453	0.077714
94	1117	1186	1263	1253	0.154578	503289	1	3.7564	-0.0014652	111.197	385.653	0.289543	484.639	17.2632	0.0583785	0.0181791	0.130108	0.000330478	480.842	17.2047	0.058412	0.0181941	0.136808	0.000331026	0.0163925	0.0780861	0.135055	0.162704	0.177788	0.164348	0.135751	0.083205	0.095621	0.141084	0.173487	0.191414	0.203308	0.162009	0.110132	0.144841	0.160775	0.161223	0.104295	0.157766	0.182556	0.195938	0.070889	0.069937	0.110277
194	1525	1537	1876	1961	0.0607914	1.75451e+06	2.34112	3.71301	-0.00192864	110.911	679.153	0.3333	259.196	12.5731	0.0795451	0.0246928	0.168236	0.000609734	258.286	12.5473	0.0796895	0.024706	0.171026	0.000610387	0.948252	0.8047	0.052424	0.065808	0.056949	0.062013	0.083231	0.091582	0.097768	0.102004	0.079255	0.05748	0.07419	0.091968	0.089708	0.063067	0.063377	0.047951	0.035898	0.038986	0.065857	0.070759	0.064468	0.051272	0.041088
92	847	909	1096	1158	0.169478	468192	118.26	3.59323	-0.00247934	111.155	407.659	0.293937	232.667	11.9242	0.0831294	0.0264115	0.137526	0.000697567	228.904	11.8351	0.0836492	0.0264527	0.151191	0.000699743	0.123923	0.972633	0.09735	0.088572	0.123886	0.178368	0.165416	0.111525	0.105067	0.135536	0.161739	0.16353	0.150539	0.124734	0.126418	0.15072	0.157276	0.12472	0.090146	0.104659	0.132593	0.147129	0.095564	0.092025	0.114341
188	1133	1179	1553	1481	0.132227	806314	1.65172	3.70486	0.00054615	94.8505	422.487	0.519482	209.157	11.3091	0.0877521	0.0275608	0.150949	0.000759598	207.39	11.2578	0.0881165	0.0275912	0.158393	0.000761276	0.660952	0.0479301	0.108848	0.12974	0.110428	0.125333	0.124297	0.121207	0.134186	0.156868	0.136678	0.102296	0.127012	0.148066	0.156516	0.152398	0.168953	0.100748	0.040151	0.076538	0.169468	0.152716	0.093626	0.080757	0.09055
80	934	924	1130	1198	0.148174	473334	1	3.68134	0.00672646	118.611	403.932	0.20572	77.6782	6.65574	0.143359	0.0475199	0.279187	0.00225814	75.5617	6.63227	0.14334	0.047546	0.297029	0.00226062	0.971046	0.672826	0.085737	0.115799	0.128242	0.154243	0.144075	0.106039	0.102284	0.127477	0.139112	0.124192	0.122171	0.116115	0.115159	0.1198	0.118109	0.109274	0.091075	0.121232	0.133847	0.143369	0.065614	0.082295	0.108597
87	850	916	1097	1163	0.157783	453074	55.2194	3.6685	0	109.837	389.115	0.308824	229.378	11.8069	0.0841481	0.026698	0.155495	0.000712783	226.206	11.7254	0.0846945	0.026742	0.166957	0.000715132	0.929764	0.566436	0.07913	0.063233	0.070041	0.128022	0.131459	0.086007	0.076017	0.119318	0.158976	0.16087	0.164909	0.157445	0.137149	0.117719	0.086636	0.092738	0.088655	0.156603	0.175404	0.166286	0.052397	0.059121	0.115743
72	624	690	959	945	0.212526	249840	1.09109	3.66294	-0.00997506	112.732	407.903	0.286331	871.033	23.1775	0.0436567	0.0136798	0.104576	0.000187137	857.897	23.0182	0.0438386	0.0137065	0.117222	0.000187869	0.63205	0.139951	0.43986	0.340773	0.355388	0.379552	0.430753	0.258372	0.25376	0.27313	0.399637	0.345501	0.458765	0.456558	0.466806	0.37627	0.327093	0.302898	0.352109	0.345013	0.350087	0.347503	0.307556	0.225028	0.267567
93	824	809	1065	1103	0.139216	380716	1.15087	3.58814	0.00081367	123.973	411.162	0.157188	387.087	15.4569	0.0642369	0.0203675	0.119917	0.000414836	385.277	15.4132	0.0648572	0.0203838	0.123655	0.0004155	0.596487	0.918185	0.101825	0.151285	0.159793	0.154138	0.146071	0.093632	0.096327	0.114752	0.149717	0.140794	0.198581	0.194044	0.147016	0.117759	0.131422	0.128217	0.09967	0.101532	0.101898	0.096569	0.056452	0.08564	0.126088
76	855	842	1017	994	0.166552	283234	2.18137	3.69006	0.00195312	122.441	342.885	0.149918	494.187	17.443	0.0576031	0.0181214	0.124125	0.000328385	488.172	17.3401	0.0576228	0.0181493	0.134441	0.000329398	0.126958	0.088551	0.088202	0.093479	0.10432	0.13392	0.117581	0.083066	0.085621	0.114883	0.143398	0.15547	0.16005	0.148461	0.134797	0.135388	0.136866	0.14473	0.122588	0.141237	0.153204	0.147846	0.054016	0.040657	0.107612
71	749	736	953	1062	0.179248	254500	1.37236	3.70525	0.00107411	115.119	307.479	0.220432	645.13	19.9091	0.0507444	0.0159314	0.119815	0.00025381	637.054	19.7965	0.0508721	0.0159489	0.130408	0.000254368	0.293152	0.982217	0.10064	0.086758	0.093509	0.129038	0.146719	0.100312	0.098188	0.123635	0.153773	0.142781	0.14015	0.128965	0.121462	0.116609	0.117512	0.114853	0.108945	0.129217	0.137015	0.134225	0.073757	0.084192	0.119825
74	835	868	1125	1157	0.139729	388515	1.03921	3.68649	-0.00232019	116.965	337.367	0.198801	837.341	22.7115	0.0444701	0.0138898	0.119757	0.000192927	832.751	22.645	0.0448783	0.0138994	0.124261	0.000193193	0.887593	0.95818	0.125366	0.152866	0.148496	0.139185	0.145004	0.112925	0.088965	0.083821	0.124274	0.140471	0.131444	0.096547	0.099723	0.095897	0.090012	0.09198	0.08765	0.130833	0.136355	0.129769	0.044224	0.071164	0.097431
190	1295	1384	1686	1884	0.107664	1.2055e+06	1	3.73701	-0.0032	90.2794	379.577	0.612488	351.965	14.6624	0.0687799	0.0212408	0.154574	0.00045117	348.152	14.5892	0.0689704	0.0212679	0.163514	0.000452325	0.418627	0.456713	0.079302	0.075757	0.050788	0.064965	0.080269	0.092661	0.107706	0.116994	0.091258	0.06774	0.087025	0.102177	0.103966	0.103216	0.11103	0.068135	0.036283	0.059394	0.099318	0.098395	0.066398	0.055511	0.037184
184	1502	1507	1894	1854	0.130919	1348916	1	3.69534	0.00201126	88.0059	419.118	0.655429	613.7	19.3575	0.0528529	0.0160635	0.162323	0.000258038	607.678	19.2531	0.0530948	0.0160847	0.170249	0.000258716	0.53996	0.915645	0.134346	0.167955	0.154177	0.144799	0.15431	0.150877	0.182452	0.230399	0.172029	0.113862	0.134401	0.197951	0.191867	0.181163	0.176888	0.127874	0.088799	0.119998	0.173717	0.179781	0.156985	0.132865	0.09754
81	812	805	1067	1080	0.229531	373638	1.04767	3.71055	0.00906344	105.101	474.32	0.39048	293.887	13.3837	0.0746278	0.0234974	0.153071	0.000552126	292.478	13.3508	0.0747199	0.0235144	0.156686	0.000552929	0.871683	0.942056	0.157828	0.182551	0.192498	0.199693	0.175483	0.10825	0.12377	0.165256	0.200082	0.178271	0.247795	0.247817	0.222302	0.173849	0.180231	0.158232	0.126181	0.181699	0.233772	0.215579	0.076371	0.052405	0.120239
85	670	662	843	828	0.240051	147792	1.01625	3.75994	-0.00460123	108.338	339.526	0.336535	384.186	15.1568	0.0663401	0.0211044	0.219262	0.000445394	367.222	14.968	0.0666392	0.0211356	0.253497	0.000446714	0.872879	0.108338	0.108521	0.134986	0.150569	0.158473	0.130538	0.076189	0.085969	0.121308	0.156799	0.145114	0.179345	0.191345	0.173287	0.122865	0.111408	0.105966	0.09317	0.087808	0.097676	0.118884	0.063977	0.058892	0.099524
196	1012	987	1180	1164	0.228923	502621	8.38258	3.72586	0	89.5039	512.978	0.625322	212.632	11.3327	0.0879719	0.0275259	0.165161	0.000757676	210.257	11.2776	0.0884937	0.0275577	0.172982	0.000759429	0.500561	0.914414	0.091502	0.112356	0.146353	0.154466	0.146853	0.129658	0.183052	0.209105	0.187918	0.135233	0.126541	0.166637	0.172766	0.166395	0.181487	0.144179	0.09509	0.139189	0.204614	0.220188	0.154957	0.156009	0.08454
83	627	614	846	830	0.217621	147838	1	3.66132	-0.0128824	108.397	339.421	0.335104	422.062	15.9355	0.0633497	0.0200372	0.206663	0.000401491	410.782	15.852	0.062949	0.0200357	0.227789	0.000401429	0.95851	0.453684	0.165859	0.233036	0.305346	0.342552	0.272089	0.179016	0.187958	0.278451	0.291931	0.285017	0.302597	0.298475	0.275205	0.262594	0.247359	0.261637	0.246407	0.313508	0.338915	0.351888	0.160571	0.176217	0.256711
77	1015	1029	1256	1244	0.183889	605056	1.12321	3.63796	-0.00140252	110.728	421.188	0.302797	86.7785	7.12234	0.134548	0.0442549	0.28062	0.0019585	85.9549	7.08737	0.134879	0.0442971	0.284671	0.00196223	0.777162	0.589985	0.100319	0.132107	0.146285	0.16917	0.153403	0.08438	0.049187	0.095951	0.143492	0.14676	0.142262	0.136145	0.131916	0.122011	0.110333	0.110269	0.103241	0.148638	0.167212	0.158124	0.055111	0.072486	0.129514
84	826	824	1198	1175	0.131555	492207	1	3.80247	-0.000686813	117.091	398.961	0.219887	168.966	10.1505	0.0967064	0.0309059	0.149873	0.000955174	168.019	10.1253	0.0968801	0.0309208	0.154385	0.000956096	0.429813	0.543563	0.112353	0.124093	0.126415	0.138196	0.129606	0.073113	0.082527	0.121743	0.160315	0.154387	0.174356	0.161466	0.136116	0.107624	0.119024	0.117757	0.077101	0.103553	0.113793	0.12195	0.048016	0.072717	0.108907
97	569	567	800	802	0.211872	148880	1.26734	3.54648	-0.0112994	120.721	293.447	0.149845	228.24	11.8367	0.0826944	0.0267573	0.15618	0.000715955	227.107	11.8151	0.0832671	0.0267714	0.158903	0.00071671	0.0848223	0.0553195	0.089484	0.08719	0.091737	0.120686	0.123651	0.088129	0.08675	0.125886	0.162852	0.153462	0.144877	0.130907	0.122088	0.136065	0.127441	0.120175	0.098849	0.156629	0.1631	0.138055	0.046692	0.053873	0.100548
183	1317	1373	1686	1832	0.120134	1464288	1.48065	3.68692	0	92.2995	535.852	0.569342	372.785	15.0457	0.0675797	0.0205911	0.17785	0.000423994	368.433	14.9615	0.0677012	0.0206192	0.187033	0.000425151	0.363576	0.832684	0.072503	0.082191	0.08134	0.115851	0.112238	0.094425	0.112632	0.141293	0.119532	0.095072	0.110142	0.116408	0.104764	0.094074	0.101607	0.068707	0.049547	0.090106	0.137542	0.134081	0.093909	0.087615	0.061239
197	1056	957	1468	1315	0.12094	693246	2.31513	3.63552	-0.00218818	96.3485	423.469	0.501293	1232.34	27.5049	0.0373778	0.0113482	0.145226	0.000128782	1219.77	27.3663	0.0375586	0.0113629	0.153496	0.000129115	0.00353221	0.817251	0.084584	0.086884	0.077275	0.078151	0.094229	0.096389	0.107495	0.118366	0.081737	0.059247	0.065708	0.118121	0.137207	0.141082	0.118208	0.075328	0.048252	0.092317	0.143101	0.119431	0.074566	0.064257	0.034198
68	927	945	1057	1131	0.188519	401992	1.56198	3.70758	0	107.389	491.345	0.369757	810.925	22.3573	0.0454685	0.01409	0.125482	0.000198527	805.896	22.2684	0.045712	0.0141039	0.130402	0.000198921	0.533886	0.211566	0.107101	0.115068	0.126216	0.131527	0.100831	0.060518	0.075253	0.119224	0.173415	0.18704	0.176198	0.159188	0.145517	0.153605	0.17076	0.181118	0.127985	0.16683	0.182317	0.196761	0.057316	0.08694	0.126875
99	922	936	1052	1127	0.194991	407506	1.27153	3.61639	0.00373134	108.157	493.211	0.361433	662.166	20.1811	0.0500244	0.0155869	0.127163	0.000242951	658.312	20.1134	0.0504508	0.0155974	0.13191	0.000243279	0.875125	0.833487	0.171315	0.180803	0.187333	0.191428	0.160664	0.110302	0.136393	0.170625	0.185447	0.173026	0.183827	0.187954	0.1682	0.156251	0.164883	0.16593	0.12827	0.17378	0.200363	0.196424	0.059757	0.102646	0.162033
98	1113	1105	1364	1245	0.0898514	619967	1	3.69602	0	125.616	492.913	0.161526	211.473	11.3535	0.0867369	0.0276962	0.159159	0.000767081	208.551	11.2831	0.0873878	0.0277269	0.170532	0.000768782	0.225498	0.955366	0.074018	0.08257	0.105055	0.140079	0.130861	0.075892	0.069399	0.101127	0.129838	0.115178	0.143175	0.152089	0.136674	0.107791	0.101738	0.095868	0.081566	0.086576	0.100476	0.107782	0.04528	0.038486	0.068032
73	616	682	966	931	0.210828	232963	1.77636	3.72739	0	111.974	375.758	0.291961	1030.79	25.253	0.0399981	0.0125735	0.101021	0.000158093	1019.51	25.1034	0.0402479	0.012589	0.110383	0.000158484	0.0261966	0.806553	0.33205	0.258459	0.276174	0.364809	0.405146	0.376752	0.330068	0.331744	0.377419	0.388327	0.367675	0.3414	0.314344	0.356781	0.420726	0.442648	0.37503	0.436921	0.474287	0.396046	0.187329	0.275281	0.430415
79	1045	1059	1262	1242	0.148538	622474	1.03011	3.64389	0.000627746	111.006	432.305	0.300628	80.9188	6.74231	0.142147	0.0469494	0.346686	0.00220425	78.8896	6.69011	0.142799	0.0470188	0.360048	0.00221076	0.710999	0.86695	0.110278	0.156618	0.172182	0.162482	0.129073	0.09075	0.10676	0.143554	0.151713	0.154952	0.161997	0.150486	0.135163	0.152717	0.161886	0.136877	0.092623	0.139335	0.160547	0.146287	0.043802	0.065253	0.112836
185	1005	1012	1255	1239	0.201225	616418	1.27153	3.58771	0	98.6243	539.307	0.517888	577.813	18.7936	0.0542002	0.0165928	0.151755	0.000275321	576.744	18.7847	0.0540716	0.0165959	0.152943	0.000275423	0.568103	0.921084	0.097054	0.103648	0.087469	0.103995	0.112141	0.123683	0.136665	0.143942	0.123906	0.101364	0.114487	0.132672	0.135387	0.126609	0.131021	0.103213	0.066946	0.086261	0.135895	0.141462	0.0948	0.091924	0.079105
69	914	907	1061	1074	0.193203	378064	1.16125	3.75658	0.00181984	111.077	479.085	0.307477	301.434	13.5637	0.0738124	0.0231849	0.146158	0.000537538	299.635	13.5298	0.0738993	0.0232034	0.150719	0.000538397	0.162016	0.461817	0.319139	0.290669	0.359396	0.312984	0.299748	0.210739	0.221165	0.253779	0.204461	0.246433	0.595872	0.647853	0.339955	0.244603	0.480354	0.699937	0.630764	0.658386	0.497021	0.574305	0.37904	0.407171	0.328753
195	1249	1014	1824	1696	0.114352	1.17022e+06	1	3.68682	0.000801603	100.923	416.602	0.429826	174.938	10.2441	0.0964437	0.030468	0.172612	0.000928297	173.605	10.2156	0.096488	0.0304894	0.178205	0.000929604	0.556035	0.0809374	0.098181	0.111119	0.095599	0.114419	0.10996	0.113951	0.123484	0.167278	0.141097	0.111901	0.123298	0.145712	0.142716	0.130208	0.137012	0.089712	0.052996	0.069375	0.120322	0.133546	0.118417	0.087305	0.068379
89	781	780	1000	1003	0.195101	220758	1.75303	3.77497	0.00887199	113.352	297.294	0.240798	591.758	19.1062	0.0525877	0.0165321	0.120608	0.00027331	585.627	19.0107	0.0527648	0.0165501	0.129403	0.000273905	0.940029	0.412917	0.077826	0.100134	0.127285	0.137848	0.115075	0.054242	0.063397	0.112707	0.125341	0.122353	0.131218	0.134382	0.123901	0.116724	0.10633	0.09279	0.075694	0.119005	0.139381	0.131771	0.029054	0.033226	0.074485
70	576	768	1019	1106	0.196767	383312	1.68541	3.63983	-0.00173461	109.262	434.595	0.326619	358.626	14.8256	0.0675038	0.0213013	0.154165	0.000453744	353.615	14.7262	0.0677697	0.021335	0.165884	0.000455183	0.597433	0.0737463	0.155419	0.170659	0.176503	0.194327	0.165055	0.103397	0.108861	0.170403	0.186855	0.205151	0.23027	0.197744	0.136368	0.127263	0.158298	0.161756	0.165049	0.230051	0.248873	0.202844	0.060823	0.074341	0.117277
187	1022	966	1223	1168	0.20347	481136	1.29915	3.52421	0	93.0155	510.239	0.570454	496.828	17.4514	0.057965	0.0178703	0.140435	0.000319348	491.545	17.3684	0.0580891	0.0178887	0.14931	0.000320006	0.572147	0.937363	0.15348	0.173	0.179347	0.168737	0.171229	0.16924	0.208154	0.243148	0.190986	0.134436	0.147741	0.188638	0.193986	0.202319	0.208913	0.126802	0.07158	0.140813	0.201546	0.189004	0.130003	0.134832	0.09765
186	1079	1015	1181	1328	0.178508	619382	1.24864	3.70737	-0.00562193	97.549	548.522	0.503903	607.759	19.3047	0.0524167	0.0161579	0.141952	0.000261077	606.19	19.2913	0.0527486	0.0161605	0.143811	0.000261161	0.225463	0.21908	0.137695	0.15285	0.138899	0.154425	0.15941	0.171518	0.190583	0.233344	0.162756	0.123754	0.157141	0.188108	0.178904	0.143927	0.164346	0.120865	0.101967	0.116999	0.186609	0.195813	0.16475	0.148803	0.111234
91	853	918	1098	1159	0.146989	450501	24.8965	3.70177	-0.000737463	109.85	389.917	0.309051	192.619	10.8413	0.0906151	0.0291012	0.145526	0.000846877	189.87	10.7691	0.0913043	0.029145	0.157351	0.000849432	0.846055	0.356413	0.13083	0.150214	0.149983	0.162588	0.157412	0.105004	0.103353	0.146594	0.17466	0.160713	0.202384	0.213117	0.182135	0.154188	0.156536	0.146841	0.108504	0.099223	0.101779	0.113301	0.067192	0.084217	0.129274
192	1190	1259	1639	1525	0.161109	1068020	1	3.73188	0.000497018	89.9603	464.252	0.614121	239.667	12.0728	0.0827694	0.0257629	0.165564	0.000663728	236.162	11.9984	0.0832654	0.0257981	0.177098	0.000665544	0.932351	0.273041	0.157107	0.175139	0.157024	0.160249	0.183878	0.181026	0.183305	0.213789	0.174772	0.133155	0.151739	0.211852	0.201881	0.196792	0.1922	0.132736	0.082874	0.127932	0.20596	0.206065	0.17008	0.120894	0.089412
78	790	819	1227	1215	0.173674	590379	1.11506	3.65911	-0.00141945	109.795	409.519	0.312206	92.4041	7.45889	0.128546	0.0420438	0.231179	0.00176768	93.1817	7.44666	0.128715	0.0420761	0.220374	0.0017704	0.0458952	0.129216	0.115352	0.131446	0.158355	0.17666	0.150002	0.103183	0.106203	0.150057	0.182284	0.175833	0.164318	0.174007	0.171855	0.150644	0.136124	0.150694	0.130677	0.150109	0.158102	0.165254	0.089535	0.106287	0.146847
90	870	893	1043	1007	0.169552	346684	1	3.75043	0.00260417	125.054	398.447	0.147148	134.106	8.99425	0.107461	0.0351358	0.20529	0.00123453	133.296	8.96132	0.108021	0.0351645	0.209999	0.00123654	0.832716	0.796229	0.134563	0.126723	0.113724	0.08899	0.099309	0.094476	0.105523	0.113202	0.117323	0.124601	0.128395	0.132408	0.128524	0.122283	0.124002	0.136532	0.109734	0.118453	0.140763	0.146493	0.054021	0.069131	0.118382
86	735	731	926	942	0.218616	263190	1	3.70401	0.00472813	116.574	501.254	0.257194	257.23	12.5715	0.0784713	0.0250601	0.127166	0.00062801	254.692	12.4969	0.0791818	0.0250878	0.136246	0.000629396	0.355958	0.676906	0.202629	0.22349	0.21784	0.212504	0.17944	0.145254	0.142739	0.204162	0.233308	0.264775	0.266033	0.231213	0.218913	0.248431	0.248946	0.196186	0.147309	0.204524	0.246532	0.247881	0.126764	0.127399	0.193817
198	932	929	1152	1182	0.219095	499376	1.38181	3.64394	-0.00337268	92.8275	501.077	0.605222	236.649	12.0436	0.0824143	0.0258909	0.144322	0.000670341	236.718	12.0411	0.0825242	0.0258932	0.144094	0.000670456	0.480889	0.595462	0.118709	0.126786	0.141447	0.195379	0.190202	0.173156	0.196275	0.260697	0.216592	0.181289	0.181942	0.210395	0.169951	0.186706	0.203843	0.159732	0.113112	0.152025	0.193967	0.196036	0.162298	0.13877	0.098012
88	926	862	1075	1049	0.151594	381286	1	3.65728	-0.00564061	122.556	413.05	0.175357	115.803	8.38643	0.114788	0.0375129	0.177059	0.00140722	115.178	8.35887	0.115588	0.0375423	0.181121	0.00140942	0.148778	0.348042	0.067662	0.073185	0.095214	0.105265	0.084394	0.062058	0.073519	0.094185	0.117499	0.121933	0.115262	0.104084	0.111957	0.104135	0.084516	0.077415	0.077617	0.120675	0.125498	0.11928	0.045176	0.058006	0.082262
75	875	915	1130	1151	0.146244	383034	1.02179	3.74773	0	116.908	338.473	0.199969	1100.94	26.0889	0.0388792	0.0121155	0.107552	0.000146785	1092.63	25.9808	0.0390598	0.0121259	0.113592	0.000147038	0.0161186	0.711011	0.245972	0.274349	0.298732	0.294244	0.301439	0.276586	0.258704	0.266458	0.326299	0.354395	0.350242	0.310758	0.299424	0.323795	0.347392	0.336665	0.316843	0.31044	0.30452	0.286579	0.236019	0.320304	0.416296
193	1401	1438	1563	1752	0.152505	1130934	1.70798	3.74113	0.00236855	94.2137	519.253	0.536726	594.954	19.0744	0.0533749	0.0162826	0.157327	0.000265123	590.092	19.0013	0.0536992	0.0162966	0.163956	0.000265579	0.587494	0.754863	0.13995	0.168802	0.170151	0.205895	0.176401	0.14477	0.158313	0.223908	0.198447	0.149301	0.159171	0.200423	0.198535	0.201254	0.215839	0.143065	0.065761	0.114651	0.207718	0.208319	0.162983	0.146168	0.109842
82	669	673	849	840	0.202516	185472	1.0167	3.74251	0.00546448	113.841	434.127	0.278878	304.013	13.4397	0.0744223	0.0237648	0.215413	0.000564766	291.593	13.3131	0.0744363	0.0237838	0.24801	0.000565667	0.710162	0.145886	0.102268	0.140841	0.175828	0.213987	0.162201	0.107958	0.113386	0.171101	0.191477	0.180061	0.227888	0.216033	0.182699	0.151806	0.171466	0.164675	0.128855	0.182886	0.217799	0.190637	0.056239	0.096014	0.170194
96	754	743	1042	1029	0.144336	250640	5.34814	3.63148	0.00185529	112.919	295.152	0.253121	767.103	21.7474	0.0464485	0.0144994	0.11999	0.000210232	768.589	21.7708	0.0464892	0.0144996	0.117555	0.000210238	0.00773751	0.673779	0.079718	0.078571	0.090348	0.128689	0.131401	0.096677	0.099477	0.129304	0.157164	0.157468	0.167221	0.165375	0.135745	0.121441	0.108259	0.125526	0.093314	0.134435	0.149439	0.14758	0.045053	0.064797	0.106624
189	977	969	1091	1259	0.161815	534008	1.73808	3.57163	0.00071736	102.714	528.893	0.440134	594.59	19.0982	0.0531142	0.0163912	0.140176	0.000268672	595.422	19.1112	0.0530973	0.0163938	0.138682	0.000268758	0.298245	0.881432	0.091162	0.093766	0.099344	0.13428	0.127183	0.105576	0.111663	0.146604	0.127967	0.096591	0.121024	0.157535	0.149015	0.126993	0.131665	0.097929	0.076589	0.097841	0.126281	0.110059	0.073162	0.080115	0.069099
258	293	295	472	468	0.545496	22630.5	2.44867	3.59884	0.0352941	128.355	303.763	0.035704	1878.22	33.9643	0.0309576	0.00905564	0.207731	8.20045e-05	1863.45	33.9574	0.0297081	0.00905037	0.212561	8.19091e-05	0.422543	0.455818	0.032206	0.040681	0.070527	0.102895	0.111676	0.094415	0.091184	0.098785	0.107025	0.099157	0.095792	0.088147	0.089591	0.087614	0.108682	0.091195	0.067379	0.060567	0.076853	0.072628	0.082019	0.091129	0.070463
228	276	277	428	426	0.667171	15136.5	6.62577	3.69421	-0.0588235	133.543	279.045	0.000660655	824.33	22.4596	0.0453041	0.0125206	0.345816	0.000156766	858.57	22.9013	0.0449216	0.0124522	0.317718	0.000155056	0.927455	0.707929	0.06198	0.082287	0.085964	0.092241	0.085099	0.084527	0.080596	0.086837	0.07849	0.080122	0.084227	0.081172	0.072457	0.069597	0.082123	0.074344	0.058446	0.067578	0.078903	0.078549	0.085226	0.104322	0.071773
250	341	340	518	524	0.599296	35900.5	1.16736	3.51643	0.014218	107.967	405.953	0.390357	1938.48	34.3232	0.0305859	0.0083416	0.340914	6.95823e-05	1926.78	34.3453	0.0300619	0.00833263	0.344043	6.94326e-05	0.273842	0.888658	0.047691	0.073928	0.086046	0.087491	0.090368	0.087816	0.08495	0.084442	0.081161	0.081835	0.090634	0.090425	0.076956	0.088743	0.106181	0.086123	0.04997	0.063823	0.087619	0.086571	0.084581	0.081823	0.053894
259	320	322	509	504	0.545034	31212.5	1.46846	3.68519	0.00934579	118.774	347.142	0.197453	2089.32	35.7535	0.0283486	0.00834953	0.256324	6.97147e-05	2080.14	35.7295	0.0289777	0.00836965	0.259414	7.00511e-05	0.245033	0.768817	0.054585	0.086467	0.088039	0.079565	0.086222	0.100856	0.093687	0.085252	0.075073	0.089771	0.104588	0.109069	0.100894	0.085644	0.08275	0.070533	0.060167	0.076389	0.092268	0.083597	0.080869	0.091027	0.069244
246	326	324	458	456	0.616173	21618	1.70142	3.4	0	115.524	461.836	0.333703	2042.5	35.3291	0.0295138	0.0079655	0.350692	6.34492e-05	2085.28	35.8524	0.0286202	0.00794746	0.33576	6.31621e-05	0.937668	0.343487	0.064949	0.089441	0.091828	0.078336	0.085454	0.090808	0.09244	0.093982	0.089277	0.068406	0.073829	0.088492	0.09744	0.092069	0.113965	0.095367	0.064576	0.058094	0.08074	0.074516	0.077805	0.092313	0.073176
256	317	317	483	486	0.572295	26558	1.85896	3.68108	0.00546448	122.818	367.114	0.148204	2001.84	35.1407	0.0299655	0.00850016	0.25136	7.22527e-05	1983.6	34.9222	0.0291575	0.0085144	0.256967	7.24949e-05	0.709623	0.490369	0.048585	0.080959	0.077843	0.067668	0.077451	0.089435	0.086087	0.084993	0.090324	0.089312	0.08777	0.074121	0.071406	0.069085	0.100472	0.082066	0.052654	0.043802	0.06711	0.06023	0.072015	0.081231	0.050623
238	334	340	546	552	0.59414	45553.5	1.04266	3.34661	-0.0361446	101.626	552.613	0.478185	1566.73	30.7856	0.0336296	0.00916826	0.35668	8.4057e-05	1552.75	30.6412	0.0332845	0.00917924	0.36207	8.42585e-05	0.607529	0.037355	0.076832	0.105039	0.10549	0.11648	0.12597	0.121327	0.106588	0.112311	0.108172	0.12497	0.123901	0.11353	0.092469	0.091199	0.106779	0.097021	0.074791	0.062412	0.083841	0.084312	0.080711	0.078265	0.066616
281	299	298	480	477	0.591767	25779.5	1.84187	3.36612	-0.0331492	121.201	392.497	0.183479	1614.44	31.4501	0.0335529	0.00920186	0.344057	8.46742e-05	1614.16	31.5056	0.0329809	0.00920557	0.343622	8.47425e-05	0.200401	0.174895	0.055718	0.075648	0.093502	0.096044	0.105366	0.098451	0.101262	0.105237	0.096385	0.082833	0.093187	0.095067	0.099636	0.101124	0.11163	0.09015	0.068751	0.07583	0.095385	0.102433	0.098567	0.116136	0.085134
232	502	499	699	703	0.554027	123885	1.10664	3.72158	0	95.975	708.724	0.562578	689.795	20.3451	0.0511184	0.0146179	0.306258	0.000213682	692.766	20.3277	0.051213	0.0146205	0.303272	0.000213759	0.372396	0.499907	0.057541	0.089459	0.099188	0.103492	0.120368	0.109559	0.105199	0.100869	0.09838	0.097884	0.106068	0.105715	0.105126	0.100915	0.108318	0.08583	0.067574	0.09076	0.113802	0.094351	0.074387	0.102277	0.091592
240	314	295	445	449	0.59273	17767.5	2.98247	3.68047	0.011976	119.9	281.168	0.139356	2218.58	37.029	0.0260166	0.00799274	0.362991	6.38838e-05	2264.07	37.4988	0.0265255	0.00798192	0.348494	6.37111e-05	0.335544	0.865244	0.059792	0.082476	0.092627	0.106464	0.102403	0.105061	0.100766	0.108425	0.102798	0.109577	0.118235	0.109974	0.087998	0.103851	0.132181	0.110034	0.07168	0.080768	0.109023	0.103076	0.091647	0.087418	0.070433
277	301	300	480	483	0.575137	25114	1.14998	3.58571	0	115.386	372.232	0.270208	1895.76	33.9529	0.030881	0.00849662	0.337129	7.21926e-05	1877.69	33.8689	0.0302438	0.00849776	0.343858	7.2212e-05	0.580713	0.527617	0.033323	0.041801	0.045518	0.066391	0.074833	0.073014	0.068376	0.088492	0.085454	0.086763	0.085802	0.093603	0.085444	0.104017	0.121324	0.097187	0.055757	0.067315	0.092919	0.088286	0.08116	0.089082	0.066086
261	325	325	530	533	0.631125	41386.5	1.14342	3.60811	0.00454545	111.679	571.439	0.346417	599.621	19.0717	0.053532	0.0150582	0.357417	0.000226748	601.362	19.1094	0.0532211	0.0150488	0.355932	0.000226467	0.301053	0.680534	0.055826	0.073704	0.080079	0.094807	0.108799	0.113229	0.104479	0.099268	0.087408	0.09094	0.104575	0.113705	0.102731	0.094604	0.103572	0.088206	0.079139	0.096513	0.111092	0.097229	0.090351	0.101051	0.083772
297	418	418	604	612	0.583053	72926	1.1787	3.73968	-0.00638978	99.762	577.301	0.49989	590.649	18.8888	0.0541261	0.0156587	0.312701	0.000245196	592.314	18.8971	0.0542624	0.0156642	0.310217	0.000245367	0.346795	0.105684	0.054283	0.076745	0.085098	0.078143	0.09025	0.097425	0.096348	0.083493	0.082186	0.094849	0.093569	0.088106	0.074941	0.070466	0.082464	0.077719	0.072382	0.079567	0.100044	0.070133	0.078423	0.092495	0.079373
263	373	372	579	576	0.575546	58543	1.04813	3.75273	0	97.2554	648.625	0.526519	1255.5	27.6972	0.0373905	0.0104969	0.27197	0.000110185	1268.87	27.8206	0.0371162	0.0104949	0.26388	0.000110142	0.0921861	0.0529393	0.089498	0.116966	0.130274	0.138475	0.148023	0.138712	0.125715	0.126793	0.124483	0.124422	0.132457	0.146843	0.118382	0.130313	0.153218	0.13928	0.084569	0.09778	0.139414	0.135597	0.133624	0.141921	0.115735
298	566	563	652	918	0.378439	165360	2.35245	3.67043	0.00189036	100.23	576.664	0.599409	1201.1	27.0471	0.0382886	0.0110716	0.252248	0.000122581	1205.42	27.0879	0.0381823	0.0110674	0.249621	0.000122488	0.944366	0.27845	0.040369	0.044019	0.050706	0.070116	0.086592	0.103046	0.106765	0.099566	0.082693	0.090013	0.108992	0.103593	0.07706	0.057622	0.077043	0.063181	0.046561	0.041111	0.062526	0.055405	0.07742	0.109266	0.094612
273	501	494	703	690	0.488094	122014	2.6291	3.471	0.032634	94.6436	729.221	0.594265	1046.46	25.1546	0.0415934	0.0116032	0.294998	0.000134635	1054.67	25.211	0.0415344	0.0116026	0.289134	0.000134621	0.334836	0.702627	0.04569	0.095563	0.095694	0.094055	0.095965	0.100838	0.085968	0.078252	0.073348	0.074742	0.087344	0.098865	0.087961	0.065646	0.084303	0.083473	0.070996	0.083107	0.105234	0.090233	0.092467	0.104815	0.070528
303	444	430	679	652	0.408509	99740.5	1.08101	3.80769	-0.00241546	110.79	467.015	0.345085	1356.97	28.9739	0.035533	0.0108047	0.117949	0.000116742	1346.89	28.9017	0.0346846	0.0108209	0.123387	0.000117092	0.4212	0.633246	0.067662	0.090979	0.10979	0.112746	0.113638	0.108022	0.105957	0.102979	0.106946	0.111027	0.115145	0.112978	0.103777	0.094682	0.103697	0.087419	0.077806	0.086133	0.107326	0.095878	0.087718	0.094417	0.081105
295	544	666	1105	778	0.357952	261692	1.88439	3.77396	0	93.1264	624.649	0.585627	1405.56	29.1602	0.0357713	0.0103912	0.237829	0.000107977	1367.91	28.7826	0.0363093	0.010432	0.258094	0.000108826	0.00602789	0.566366	0.057808	0.08626	0.089864	0.094357	0.107204	0.11599	0.102276	0.095031	0.092884	0.099867	0.113623	0.102087	0.085452	0.072993	0.091002	0.067294	0.047955	0.053547	0.084528	0.083627	0.074498	0.074691	0.069027
284	341	335	541	555	0.508895	45285	3.10228	3.53992	0.00383142	100.017	456.312	0.476118	1806.5	33.1728	0.030568	0.00874507	0.325364	7.64762e-05	1792.36	33.0154	0.0314996	0.00875696	0.330165	7.66843e-05	0.779767	0.853386	0.0407	0.069486	0.072843	0.070415	0.068921	0.071405	0.078887	0.082682	0.077408	0.075223	0.076972	0.076279	0.070861	0.064747	0.07197	0.069757	0.049027	0.050889	0.067006	0.083008	0.088497	0.078223	0.043038
268	485	444	765	580	0.31807	86882	1.08152	3.68539	0.00451467	109.948	661.518	0.373633	769.851	21.6891	0.047131	0.013521	0.301151	0.000182818	763.707	21.576	0.0476238	0.0135389	0.30677	0.000183302	0.676906	0.897765	0.065529	0.092425	0.102209	0.100673	0.104335	0.096967	0.096816	0.1054	0.103635	0.103518	0.120039	0.112573	0.095452	0.081435	0.104024	0.095053	0.086816	0.095273	0.107497	0.091228	0.087847	0.093825	0.064684
237	324	326	528	527	0.588351	37319.5	1.03681	3.76744	0	108.438	445.459	0.381088	1779.38	32.8623	0.0315238	0.00868318	0.330124	7.53977e-05	1752.81	32.609	0.0319401	0.00869864	0.339388	7.56664e-05	0.904226	0.737987	0.039183	0.041116	0.064662	0.087058	0.09459	0.096741	0.084302	0.0734	0.068092	0.086895	0.097305	0.084612	0.077423	0.078339	0.087835	0.064755	0.054651	0.075539	0.094709	0.078107	0.064995	0.086121	0.067283
289	364	370	604	616	0.530127	69401.5	1.05168	3.50329	0.00662252	103.926	377.278	0.440956	1985.89	34.5919	0.0304144	0.00866294	0.248942	7.50465e-05	1991.33	34.7088	0.0305572	0.00865373	0.247022	7.4887e-05	0.772878	0.366163	0.097823	0.128261	0.141556	0.119511	0.144411	0.127562	0.126846	0.117673	0.114609	0.118808	0.120153	0.12068	0.119879	0.125491	0.148414	0.13341	0.119248	0.119189	0.12198	0.104535	0.1257	0.148632	0.098579
233	333	330	514	520	0.582219	33695.5	3.91337	3.54464	-0.0045045	111.704	396.754	0.328026	802.706	22.1346	0.0463287	0.0125756	0.399611	0.000158147	868.229	22.5045	0.0463654	0.0125706	0.35102	0.000158021	0.857153	0.782821	0.072452	0.098813	0.096317	0.093908	0.098789	0.095535	0.086776	0.088526	0.081016	0.080268	0.097659	0.104327	0.087344	0.075636	0.080877	0.074186	0.067943	0.071459	0.079134	0.073723	0.082541	0.101563	0.082002
275	349	351	527	527	0.561107	41344.5	1.01322	3.48444	0.0044843	117.156	449.136	0.264025	1100.91	25.877	0.0394446	0.0115239	0.257708	0.0001328	1084.65	25.7634	0.0392936	0.0115322	0.268253	0.000132992	0.693985	0.0429754	0.060655	0.093972	0.105469	0.104829	0.104454	0.108035	0.107822	0.128544	0.110052	0.104913	0.107103	0.123972	0.103927	0.084452	0.084836	0.076362	0.05967	0.061955	0.086748	0.089444	0.080484	0.092595	0.077715
262	488	484	684	695	0.513513	117495	1.03807	3.78261	-0.0205656	94.4296	747.683	0.546449	1198.65	26.9798	0.038723	0.0111135	0.266161	0.00012351	1195.02	26.9249	0.0384726	0.0111268	0.268136	0.000123806	0.145264	0.892217	0.055579	0.083966	0.099107	0.101455	0.101048	0.10313	0.099439	0.102823	0.10584	0.117221	0.124117	0.109391	0.105389	0.107016	0.120214	0.089212	0.082015	0.0798	0.092455	0.083849	0.092837	0.103176	0.091325
292	361	363	604	603	0.560644	68917	1.03205	3.65176	0.0096463	99.8474	485.303	0.512573	1765.47	32.6564	0.032257	0.00902143	0.280743	8.13862e-05	1747.03	32.524	0.031932	0.00903504	0.288004	8.16319e-05	0.470689	0.465235	0.051365	0.058426	0.073532	0.09871	0.109245	0.107254	0.10154	0.104934	0.103527	0.113673	0.11484	0.111474	0.095475	0.089907	0.095033	0.095109	0.092378	0.097066	0.103188	0.090081	0.086713	0.100458	0.081302
270	337	337	532	531	0.606155	40306.5	1.12745	3.70673	-0.00485437	108.335	525.065	0.395246	133.182	8.47394	0.11702	0.0332205	0.45563	0.0011036	126.418	8.42381	0.116761	0.0332616	0.483503	0.00110633	0.278024	0.933117	0.025992	0.060942	0.083214	0.076127	0.06208	0.054796	0.070178	0.083275	0.068587	0.073215	0.082068	0.072133	0.051654	0.052101	0.059346	0.048247	0.040912	0.05477	0.06911	0.075085	0.076934	0.089004	0.054174
283	320	317	510	514	0.627275	30966.5	3.70849	3.50725	0.0097561	110.311	393.166	0.347214	556.199	18.2805	0.0559979	0.0150086	0.346884	0.000225258	550.727	18.2571	0.0551349	0.0150278	0.35201	0.000225835	0.464935	0.244662	0.032134	0.063291	0.088522	0.0893	0.085949	0.076591	0.073272	0.074106	0.07119	0.071879	0.090643	0.099662	0.076756	0.076235	0.098183	0.08271	0.054031	0.067182	0.089874	0.083935	0.08479	0.093464	0.065899
244	329	325	513	519	0.606411	33846.5	1.04419	3.9	0.00561798	107.09	395.767	0.398653	1886.57	33.7693	0.030815	0.00845451	0.338963	7.14788e-05	1885.27	33.728	0.0305391	0.00849218	0.338944	7.21171e-05	0.369291	0.828276	0.07403	0.099852	0.103974	0.100579	0.118994	0.110991	0.096919	0.091036	0.090576	0.092442	0.103521	0.09447	0.08335	0.080125	0.113893	0.107926	0.090626	0.094578	0.118813	0.104787	0.08771	0.090979	0.068003
267	294	294	461	460	0.534938	21816.5	1.25347	3.54396	-0.0444444	131.334	308.548	0.00362111	1515.03	30.4514	0.0343757	0.00970119	0.29811	9.4113e-05	1490.43	30.2717	0.0340552	0.00972335	0.308776	9.45436e-05	0.191336	0.650213	0.036722	0.069165	0.089258	0.080468	0.073792	0.076509	0.081197	0.082904	0.073572	0.087375	0.104603	0.099311	0.082251	0.086154	0.110208	0.087685	0.048726	0.064484	0.093036	0.086727	0.07855	0.08246	0.056752
290	452	441	754	741	0.452642	158704	1.04403	3.59963	0.00186916	103.258	556.905	0.507809	186.288	10.5577	0.0942989	0.02845	0.330347	0.000809401	191.717	10.6661	0.0944513	0.0283838	0.310698	0.000805638	0.688374	0.999644	0.049693	0.074574	0.088246	0.089729	0.088933	0.083424	0.084703	0.094833	0.102632	0.100948	0.120897	0.127546	0.111051	0.078833	0.083962	0.071028	0.063009	0.081584	0.093918	0.080196	0.082763	0.105802	0.07343
300	431	414	674	657	0.481657	96651.5	1.14851	3.74022	0	100.521	396.096	0.495429	1725.75	32.4144	0.0325263	0.00939715	0.220258	8.83065e-05	1706.8	32.2366	0.0323829	0.00941155	0.228243	8.85772e-05	0.270176	0.744879	0.061217	0.085603	0.095725	0.103198	0.11149	0.112923	0.105741	0.10166	0.092741	0.099368	0.099189	0.085972	0.087358	0.098367	0.111019	0.084527	0.070055	0.088192	0.095652	0.077402	0.062389	0.08305	0.070482
235	408	502	638	852	0.426972	135422	1.2411	3.53542	0.0146444	96.9076	598.19	0.548255	762.1	21.3658	0.048682	0.0136988	0.308031	0.000187658	735.05	21.0449	0.0492819	0.013754	0.332429	0.000189172	0.920149	0.133484	0.055233	0.088365	0.090299	0.088235	0.107675	0.108762	0.087747	0.095755	0.09636	0.112853	0.091962	0.097545	0.092215	0.099102	0.105513	0.084831	0.066617	0.083489	0.104887	0.093913	0.094276	0.117023	0.075806
310	356	271	611	600	0.575279	69011.5	1.05258	3.58824	0	103.22	375.934	0.452359	1787.7	32.8872	0.0319059	0.00902592	0.263564	8.14673e-05	1807.64	33.1374	0.03161	0.00899775	0.254851	8.09596e-05	0.909715	0.132896	0.114224	0.124313	0.129201	0.133012	0.150364	0.155016	0.137176	0.127183	0.118102	0.142889	0.152801	0.149739	0.143358	0.130578	0.137051	0.116262	0.089588	0.113782	0.137	0.1395	0.121479	0.130184	0.079627
282	539	482	587	878	0.305974	128274	2.06853	3.65341	0.00380228	104.378	601.804	0.54201	1176.59	26.8512	0.038053	0.0107812	0.288015	0.000116234	1185.35	26.9139	0.0379355	0.0107761	0.282452	0.000116124	0.820574	0.948505	0.050564	0.086919	0.093244	0.105345	0.108864	0.097848	0.083773	0.094493	0.097457	0.084591	0.087487	0.097406	0.102085	0.090859	0.08818	0.070789	0.058266	0.055513	0.065712	0.064159	0.065049	0.06629	0.050915
247	340	345	564	553	0.552233	48486.5	2.73093	3.68266	0.00371747	103.78	498.936	0.45357	271.417	12.6004	0.0812827	0.0224583	0.346808	0.000504376	270.553	12.5896	0.08023	0.0224621	0.353285	0.000504547	0.908011	0.327735	0.028338	0.036667	0.063904	0.088715	0.092882	0.087026	0.095375	0.098187	0.081299	0.070364	0.085147	0.094517	0.095575	0.085569	0.088272	0.064313	0.053814	0.076391	0.103776	0.099794	0.089011	0.095854	0.065278
296	683	678	903	929	0.364353	261663	4.85584	3.75556	0	70.3134	909.516	0.943729	247.068	11.733	0.090565	0.0262767	0.480792	0.000690467	219.085	11.3424	0.0921742	0.0263893	0.5399	0.000696397	0.0874077	0.72832	0.059347	0.062194	0.064075	0.088535	0.104492	0.111582	0.101155	0.097242	0.091585	0.098015	0.114008	0.114515	0.10269	0.08698	0.103772	0.079709	0.065687	0.083408	0.114025	0.082718	0.078806	0.103499	0.097875
253	297	298	468	470	0.556407	23497	3.1181	3.55621	-0.0359281	126.575	286.425	0.0361748	2436.4	38.8017	0.025736	0.00798757	0.225261	6.38013e-05	2449.42	38.859	0.0264986	0.00799999	0.220254	6.39998e-05	0.3271	0.612378	0.061568	0.068432	0.07026	0.075497	0.09789	0.094751	0.081944	0.07787	0.08004	0.094009	0.098925	0.091919	0.085544	0.087237	0.103533	0.089185	0.056308	0.060989	0.088115	0.078616	0.070587	0.085921	0.073846
272	357	359	563	565	0.529394	54852	1.01308	3.54817	0.0234114	113.4	517.874	0.327135	275.57	12.7453	0.0796878	0.0231171	0.284721	0.000534399	271.01	12.6992	0.0793698	0.0231381	0.296564	0.000535371	0.559738	0.756629	0.052419	0.07741	0.084089	0.079348	0.090578	0.079878	0.082389	0.086199	0.075975	0.060449	0.071832	0.078441	0.069476	0.060659	0.075512	0.074365	0.053919	0.052071	0.075957	0.077945	0.07135	0.072062	0.061048
241	326	325	463	461	0.586713	21940	2.87689	3.72667	0.0472973	133.492	323.85	0.00200547	1062.04	25.5095	0.0396606	0.0116426	0.258988	0.00013555	1066.67	25.5575	0.0394603	0.0116228	0.255766	0.000135089	0.349566	0.51238	0.037621	0.061033	0.071381	0.074722	0.090529	0.078114	0.072023	0.077794	0.074674	0.068087	0.084225	0.089195	0.080354	0.071149	0.082997	0.06798	0.052493	0.052243	0.07081	0.063387	0.051206	0.05462	0.046186
286	409	411	610	594	0.507181	69979.5	1.03761	3.82468	-0.0261438	100.632	646.037	0.536571	1025.95	24.924	0.0411792	0.0116274	0.26579	0.000135197	989.956	24.511	0.0423917	0.0116759	0.290946	0.000136327	0.33258	0.521297	0.056688	0.092937	0.115047	0.106055	0.110605	0.100222	0.087183	0.083546	0.090633	0.099486	0.108293	0.106896	0.103674	0.109555	0.130412	0.102709	0.061164	0.081542	0.117759	0.116485	0.092345	0.088842	0.060705
231	312	313	507	507	0.605517	34580.5	1.07454	3.67464	0.0289855	115.005	457.864	0.314455	174.122	10.1271	0.0980965	0.0276779	0.389021	0.000766066	178.983	10.1897	0.0987052	0.0276534	0.377999	0.000764712	0.406779	0.147363	0.043249	0.042013	0.065027	0.104678	0.12117	0.101635	0.103197	0.109542	0.103984	0.103089	0.105742	0.103388	0.089815	0.086402	0.10655	0.098949	0.074845	0.074728	0.09686	0.090135	0.07869	0.099857	0.085474
245	308	308	481	482	0.57528	24896	1.20706	3.51724	0.0116279	117.842	355.787	0.213046	1924.2	34.3928	0.029955	0.0083527	0.357326	6.97676e-05	2000.29	34.875	0.0303531	0.00833311	0.331631	6.94407e-05	0.24222	0.00365886	0.06617	0.080863	0.093465	0.096813	0.106266	0.090977	0.096383	0.104746	0.095406	0.086476	0.089695	0.095768	0.087525	0.082644	0.094095	0.092537	0.075159	0.072869	0.086014	0.093184	0.090738	0.087852	0.066237
266	391	386	543	549	0.586442	43558.5	1.90909	3.74888	-0.00904977	102.871	466.019	0.466798	1632.82	31.4245	0.0335938	0.00894839	0.369299	8.00736e-05	1619.57	31.3149	0.0330477	0.00895836	0.374761	8.02521e-05	0.56457	0.408236	0.03918	0.045874	0.07208	0.092917	0.094588	0.086486	0.095548	0.107874	0.109609	0.093773	0.090484	0.084046	0.078824	0.06603	0.072772	0.071056	0.063024	0.075936	0.076445	0.071843	0.072098	0.095718	0.066612
236	392	397	607	616	0.545036	69788.5	1.40211	3.82034	0.0477816	100.369	602.005	0.475852	927.24	23.6465	0.0441443	0.012135	0.331915	0.000147257	904.589	23.4029	0.0439484	0.0121806	0.348534	0.000148366	0.680903	0.829552	0.067985	0.102858	0.114076	0.100455	0.10271	0.112775	0.107445	0.090212	0.084568	0.103067	0.109314	0.10433	0.097929	0.097404	0.120627	0.097718	0.056805	0.059235	0.089493	0.084504	0.059251	0.057448	0.046021
293	420	419	585	594	0.509377	57864	1.05416	3.50704	0.0212766	96.4341	385.876	0.551396	1721.77	32.3143	0.0326031	0.00918995	0.237518	8.44553e-05	1724.32	32.3801	0.0323631	0.00919091	0.236126	8.44729e-05	0.808964	0.549143	0.04754	0.070733	0.079153	0.078732	0.0887	0.094904	0.08739	0.085234	0.082817	0.09219	0.088918	0.074405	0.075899	0.076538	0.089095	0.071427	0.057977	0.05886	0.073251	0.067468	0.068074	0.082755	0.064161
234	274	269	407	414	0.645481	11698	1.42377	3.46825	0.0483871	129.436	229.097	0.002821	2203.94	36.8653	0.0275928	0.00843833	0.344786	7.12053e-05	2216.77	36.9162	0.0286027	0.00844726	0.338783	7.13563e-05	0.0266111	0.558396	0.045792	0.069591	0.073692	0.08019	0.09134	0.098875	0.084586	0.084074	0.09081	0.094942	0.092212	0.096368	0.085075	0.061715	0.070303	0.072994	0.064287	0.059624	0.075639	0.070362	0.071828	0.065854	0.057452
264	290	294	466	460	0.569312	20100.5	1.5852	3.5375	0.0379747	124.711	270.867	0.048158	2420.84	38.5622	0.0270863	0.00793594	0.262945	6.29791e-05	2397.97	38.3588	0.0275691	0.00793902	0.268572	6.3028e-05	0.602932	0.198943	0.055553	0.068687	0.075991	0.085801	0.099591	0.093167	0.083608	0.087562	0.08426	0.078702	0.080798	0.07589	0.075522	0.066248	0.067458	0.059712	0.059423	0.072345	0.087604	0.082049	0.07279	0.077968	0.060768
199	373	373	543	531	0.848284	43576.5	1.06052	3.71698	-0.00952381	52.0491	414.643	0.950788	430.642	15.3355	0.0740409	0.019311	0.880548	0.000372913	418.003	15.1223	0.0749919	0.0193588	0.884262	0.000374763	0.0434181	0.938072	0.148659	0.160915	0.149475	0.174143	0.206968	0.20581	0.223625	0.252468	0.197661	0.163571	0.183914	0.25635	0.219727	0.206888	0.224306	0.179765	0.11973	0.154434	0.261671	0.243217	0.184503	0.141049	0.097706
200	303	306	506	503	0.860463	32615	1.02011	3.54315	0	52.0424	390.351	0.955113	537.392	16.3983	0.077833	0.0191463	0.916121	0.000366581	510.1	16.1227	0.0770814	0.0191531	0.920555	0.000366841	0.707115	0.35536	0.156637	0.17617	0.173422	0.164989	0.147061	0.148667	0.162442	0.204153	0.152703	0.140991	0.145967	0.173439	0.189254	0.219305	0.224016	0.132447	0.093347	0.112179	0.143042	0.15114	0.135243	0.134509	0.08644
201	553	565	819	865	0.75078	226885	1.19351	3.70425	0.00371058	55.7428	267.639	0.965392	359.519	13.9841	0.0806689	0.0215505	0.831041	0.000464424	352.154	13.852	0.0816024	0.0215791	0.834523	0.000465656	0.483889	0.460432	0.08312	0.11756	0.103436	0.104294	0.098217	0.105418	0.103783	0.14326	0.126263	0.106433	0.105113	0.134329	0.141707	0.128956	0.138623	0.081589	0.052524	0.102944	0.16158	0.135557	0.082569	0.075321	0.043743
202	353	352	517	512	0.852391	36007	1.02053	3.27473	0.0111111	52.5419	388.203	0.953676	403.86	14.7981	0.0772368	0.0203341	0.882755	0.000413475	389.678	14.5612	0.0776044	0.0203971	0.887098	0.000416041	0.444221	0.0953597	0.150184	0.190763	0.15095	0.176361	0.186942	0.191848	0.173847	0.232231	0.198068	0.167398	0.158572	0.205695	0.203758	0.214709	0.199676	0.147391	0.104198	0.201372	0.271396	0.22871	0.125566	0.132128	0.094262
203	590	588	869	863	0.81991	251649	1.02849	3.46014	0.00363636	54.1816	256.513	0.966127	444.786	15.6661	0.0713115	0.0190547	0.783992	0.00036308	436.424	15.5635	0.0719617	0.0190982	0.788199	0.000364741	0.0363233	0.910235	0.074521	0.085802	0.105055	0.135407	0.117365	0.108509	0.103987	0.14301	0.114894	0.084914	0.081167	0.124385	0.143613	0.137142	0.150916	0.113019	0.073802	0.067477	0.113924	0.114122	0.088087	0.078969	0.062957
204	301	305	506	502	0.858404	32242.5	1.08322	3.34615	0	52.1667	394.278	0.954268	470.746	15.9956	0.0726607	0.018741	0.876225	0.000351226	441.846	15.5586	0.0734936	0.0187958	0.884068	0.000353282	0.0406832	0.668018	0.118444	0.121203	0.114755	0.149359	0.156189	0.156498	0.161691	0.204092	0.176564	0.144596	0.142777	0.174957	0.166278	0.166469	0.161142	0.114493	0.072202	0.095058	0.15102	0.151257	0.120035	0.111907	0.090725
205	533	537	826	838	0.83351	222996	1.01624	3.44351	0	53.7736	252.979	0.965885	384.558	14.3897	0.0798007	0.021052	0.828747	0.000443189	378.756	14.3212	0.0793734	0.0210779	0.831476	0.000444278	0.332754	0.509971	0.098686	0.112468	0.1115	0.100877	0.092843	0.098136	0.124701	0.155023	0.114758	0.083361	0.07874	0.12079	0.124408	0.147086	0.154551	0.100993	0.053913	0.109707	0.160895	0.136111	0.088774	0.091107	0.063726
206	272	271	436	436	0.822091	14013	1.01863	3.625	0	65.162	599.751	0.871334	591.776	18.2817	0.0608204	0.0132456	0.879903	0.000175445	582.503	18.167	0.0602934	0.0132004	0.881963	0.000174252	0.94712	0.431266	0.10826	0.128944	0.116274	0.136302	0.130803	0.126261	0.141902	0.183093	0.146739	0.106657	0.115405	0.169296	0.178065	0.165894	0.167086	0.128094	0.108705	0.132155	0.157932	0.14219	0.129918	0.125446	0.08845
207	455	453	800	805	0.827964	197424	1.01296	3.41649	-0.00424628	55.1316	248.308	0.96485	402.516	14.1584	0.0841528	0.0229241	0.888084	0.000525515	392.781	14.0214	0.0849217	0.0229621	0.89096	0.000527259	0.61766	0.0514655	0.107364	0.126522	0.101894	0.109074	0.117307	0.117493	0.129916	0.149378	0.119945	0.08972	0.132067	0.15926	0.156246	0.138479	0.157005	0.112942	0.082003	0.097545	0.128568	0.128678	0.099334	0.090402	0.056855
208	418	419	609	595	0.827304	72234.5	11.0183	3.47586	0.00694444	60.7821	308.724	0.944867	437.445	15.5696	0.0716189	0.0189402	0.840223	0.000358731	431.406	15.4581	0.0712005	0.0189652	0.842683	0.000359678	0.368875	0.214294	0.107428	0.113636	0.109601	0.14181	0.161907	0.164245	0.175271	0.173234	0.130909	0.11688	0.135842	0.158036	0.149749	0.155412	0.162226	0.141994	0.119047	0.157881	0.185852	0.167634	0.117346	0.122145	0.095355
209	347	346	508	513	0.842419	34479.5	1.0262	3.58373	0	54.6709	442.918	0.940037	443.801	15.6112	0.0724732	0.0188519	0.886318	0.000355395	433.073	15.4151	0.072417	0.0188912	0.88929	0.000356876	0.611977	0.856079	0.067006	0.070053	0.095239	0.149868	0.143463	0.149085	0.171404	0.232452	0.171679	0.128545	0.158402	0.219202	0.212413	0.184592	0.185173	0.135118	0.114551	0.142187	0.192361	0.17698	0.138048	0.114683	0.079648
210	331	335	543	534	0.849938	44933	1.0468	3.52308	0	51.3963	383.551	0.958182	477.743	15.5426	0.079835	0.0197571	0.908281	0.000390341	458.05	15.3216	0.0800195	0.01975	0.912252	0.000390064	0.206132	0.622204	0.156077	0.180741	0.145132	0.167779	0.156599	0.186801	0.183065	0.218352	0.170449	0.149368	0.174223	0.229409	0.231435	0.22287	0.220604	0.169128	0.121546	0.173876	0.222399	0.216758	0.168162	0.145144	0.105048
211	493	491	806	807	0.804821	203640	1.03527	3.4267	-0.0043956	60.4558	242.067	0.957938	482.513	16.0676	0.071193	0.0191617	0.846196	0.000367173	474.851	15.9467	0.0722377	0.0191935	0.848807	0.000368389	0.165066	0.193875	0.094177	0.085556	0.090942	0.106077	0.098009	0.097353	0.118679	0.146309	0.115607	0.094845	0.098912	0.126252	0.124437	0.156732	0.175435	0.120767	0.064486	0.110983	0.167235	0.160331	0.101999	0.079021	0.039735
212	315	316	517	523	0.848295	37863	1.03039	3.70283	0.00952381	56.2394	407.53	0.94076	471.738	15.9584	0.0718609	0.018367	0.888715	0.000337345	460.147	15.7923	0.072452	0.0184159	0.891667	0.000339147	0.361817	0.189203	0.138055	0.146052	0.15221	0.185017	0.179563	0.164174	0.180555	0.245469	0.202509	0.157382	0.176371	0.226615	0.209105	0.186471	0.217006	0.178917	0.132083	0.141988	0.207397	0.21188	0.173476	0.132636	0.082256
213	339	344	546	531	0.843658	45583.5	1.55046	3.69271	0	61.3242	376.333	0.931258	529.681	16.8358	0.0697664	0.0174863	0.880358	0.000305771	507.425	16.5693	0.0694347	0.0175081	0.885596	0.000306534	0.863353	0.350126	0.170912	0.205577	0.193196	0.190038	0.168308	0.17929	0.190563	0.242854	0.211113	0.199798	0.19978	0.23602	0.238503	0.233603	0.215881	0.168434	0.137216	0.155891	0.207491	0.218601	0.192075	0.161065	0.126266
214	421	424	733	730	0.831467	146666	1.00984	3.70316	0	56.1689	280.622	0.956415	344.669	13.2761	0.0891194	0.0234631	0.880494	0.000550518	335.222	13.1565	0.0889605	0.0235171	0.883859	0.000553054	0.509402	0.615297	0.100295	0.106345	0.099251	0.125325	0.152781	0.156973	0.154013	0.164789	0.145862	0.130078	0.122857	0.152482	0.163553	0.173339	0.169004	0.137919	0.105067	0.140319	0.188221	0.179653	0.102963	0.097333	0.074151
215	326	324	537	538	0.825413	43563	2.02799	3.42424	0	58.3518	361.965	0.943232	543.884	16.6897	0.0732473	0.0181399	0.902032	0.000329055	540.13	16.6214	0.0738423	0.0181774	0.902925	0.000330419	0.296902	0.542415	0.123289	0.123789	0.130313	0.181851	0.17113	0.166342	0.179173	0.24944	0.208242	0.154789	0.141453	0.178073	0.168964	0.174963	0.202545	0.163321	0.098575	0.147796	0.208862	0.208647	0.142189	0.13582	0.077239
216	366	373	514	552	0.820314	42782	46.4619	3.3379	-0.0138249	66.2707	357.024	0.915665	542.564	17.4967	0.0623372	0.0166419	0.84624	0.000276952	542.578	17.4817	0.063082	0.0166587	0.846461	0.000277512	0.950252	0.527035	0.146863	0.160894	0.156639	0.155438	0.163485	0.159398	0.180186	0.227254	0.197268	0.172268	0.171527	0.199381	0.196654	0.205508	0.234107	0.182831	0.145258	0.191895	0.249906	0.230632	0.171013	0.146871	0.102597
217	349	346	520	514	0.843819	36877	1.0385	3.52406	-0.0108108	53.9328	426.109	0.944518	422.679	15.2878	0.0722133	0.0190857	0.888295	0.000364265	417.203	15.1583	0.0743469	0.0191217	0.889954	0.000365641	0.815966	0.868931	0.138985	0.158633	0.152482	0.129432	0.11359	0.146674	0.179706	0.213349	0.154138	0.111366	0.125675	0.212282	0.231725	0.217872	0.217558	0.154571	0.113928	0.166785	0.250926	0.216705	0.136189	0.114383	0.093619
218	369	367	526	540	0.841594	42402	1.06128	3.39669	0.00833333	53.8883	415.459	0.945757	425.667	15.3293	0.0725259	0.0191887	0.875268	0.000368207	421.857	15.2515	0.0732763	0.0191962	0.876605	0.000368494	0.322974	0.861251	0.171175	0.19216	0.160775	0.173204	0.198523	0.204155	0.199092	0.222113	0.199109	0.151604	0.154124	0.187586	0.227016	0.250846	0.261283	0.148806	0.10416	0.187711	0.276693	0.220219	0.148529	0.149417	0.124631
219	369	368	531	535	0.840993	41844	1.02087	3.5567	0	51.2978	433.218	0.950172	379.612	14.4106	0.0781579	0.0201539	0.868981	0.000406179	370.368	14.2925	0.0787555	0.020162	0.872422	0.000406507	0.972098	0.845199	0.137095	0.147408	0.166598	0.19408	0.178603	0.177299	0.201417	0.232886	0.206153	0.158305	0.157715	0.176463	0.223053	0.248347	0.2669	0.195355	0.147917	0.159133	0.20394	0.214133	0.165477	0.15607	0.12856
220	391	393	566	575	0.843848	57910.5	1.37834	3.56471	-0.00790514	55.2773	358.656	0.950398	411.629	14.9585	0.0755125	0.0198077	0.867169	0.000392343	401.091	14.818	0.0757738	0.0198597	0.870776	0.000394409	0.987351	0.702452	0.141637	0.163804	0.148383	0.174001	0.19365	0.185986	0.16843	0.191109	0.150851	0.136875	0.14224	0.195829	0.198367	0.206633	0.203106	0.149525	0.108965	0.172752	0.206098	0.196722	0.130564	0.134125	0.080779
221	470	471	833	833	0.826242	221418	1.53302	3.70866	0.00197628	53.4396	256.73	0.966812	403.472	14.1806	0.0844646	0.0228912	0.885101	0.000524006	397.206	14.0879	0.0847546	0.0229045	0.887022	0.000524617	0.40866	0.39245	0.103471	0.138227	0.11707	0.115695	0.124419	0.118483	0.102525	0.116588	0.108603	0.099035	0.126823	0.161586	0.154012	0.146974	0.152834	0.116361	0.0946	0.128881	0.156457	0.14991	0.118074	0.109003	0.078416
222	367	365	543	523	0.855513	42928.5	1.09375	3.53774	0	54.1473	370.952	0.953213	454.286	15.6695	0.0738593	0.0191022	0.874431	0.000364893	440.816	15.4895	0.0741303	0.0191099	0.878371	0.000365188	0.655923	0.269344	0.181653	0.217805	0.189088	0.203712	0.178711	0.177359	0.17765	0.254577	0.231536	0.204425	0.198235	0.214563	0.201689	0.211502	0.225976	0.157876	0.109044	0.140481	0.197903	0.191538	0.157281	0.152961	0.128359
223	315	314	521	526	0.852771	39438.5	1.04387	3.57416	0.00966184	59.0533	389.442	0.937282	487.27	15.9132	0.0746348	0.0188143	0.895163	0.000353976	470.102	15.7659	0.074122	0.0187886	0.899072	0.000353012	0.405653	0.955693	0.135969	0.144435	0.120678	0.11888	0.135085	0.152443	0.170223	0.217912	0.182279	0.150222	0.11649	0.175748	0.205947	0.215648	0.208407	0.153993	0.100679	0.151624	0.24496	0.232649	0.158594	0.143484	0.091769
224	488	484	839	847	0.826429	230362	1.01415	3.46545	-0.00204082	53.1452	232.08	0.970813	380.274	13.7146	0.0872866	0.0240304	0.885593	0.000577462	372.443	13.6126	0.0877599	0.0240554	0.888093	0.000578664	0.257348	0.045285	0.096259	0.107423	0.107334	0.105569	0.106789	0.104821	0.11228	0.133105	0.11789	0.089306	0.108437	0.147809	0.167276	0.137191	0.134392	0.098245	0.084262	0.110285	0.154707	0.137962	0.088191	0.064181	0.028731
717	2570	2564	952	859	0.524533	284880	3.26105	3.80775	0.00972447	89.0853	805.382	0.685631	339.781	14.0272	0.0758512	0.0206188	0.433846	0.000425136	331.65	13.8294	0.0767073	0.0207079	0.446875	0.000428817	0.248624	0.774779	0.083001	0.105122	0.109643	0.102179	0.088974	0.07439	0.078956	0.102879	0.114868	0.110547	0.109369	0.095489	0.082721	0.07816	0.09733	0.111016	0.101531	0.090889	0.09677	0.096002	0.081889	0.068616	0.074628
511	373	375	575	573	0.654929	49112.5	1.91087	3.58796	0	70.631	677.321	0.816228	1891.11	33.5019	0.0323904	0.00804589	0.38854	6.47364e-05	1889.52	33.4238	0.0331644	0.00805791	0.388783	6.49299e-05	0.645823	0.688207	0.101927	0.107875	0.156005	0.195421	0.175603	0.146069	0.159792	0.167842	0.12555	0.130824	0.188184	0.194864	0.18439	0.177543	0.249582	0.216462	0.175484	0.150302	0.224191	0.205661	0.152698	0.147494	0.145615
723	2587	2579	864	881	0.407917	231372	1.15105	3.70787	0.00161031	75.3503	1100.36	0.839421	620.128	19.0011	0.0569823	0.0151654	0.401333	0.000229989	605.49	18.8262	0.0569124	0.0152014	0.415489	0.000231083	0.520718	0.3161	0.125616	0.140206	0.138302	0.147399	0.122523	0.105543	0.106462	0.132825	0.105255	0.11431	0.133877	0.138773	0.115696	0.121421	0.13654	0.14388	0.134343	0.137779	0.164084	0.172043	0.128736	0.085699	0.079635
745	2520	2596	894	848	0.374924	231986	2.94732	3.71609	0	76.0817	1173.17	0.68623	587.067	18.5146	0.0587157	0.0155766	0.40398	0.00024263	575.929	18.3591	0.0587681	0.0156162	0.41532	0.000243866	0.516111	0.737467	0.115982	0.12892	0.146524	0.146019	0.11194	0.065673	0.099968	0.137397	0.118164	0.109831	0.133795	0.139284	0.129019	0.117988	0.114791	0.12225	0.124827	0.112794	0.101827	0.104912	0.090791	0.077215	0.073576
556	795	764	896	1294	0.242321	426720	1.32781	3.73304	0.00626118	85.0415	1140.01	0.619475	133.532	8.84895	0.113606	0.0337141	0.296347	0.00113664	132.65	8.85606	0.112903	0.0337029	0.300913	0.00113588	0.404739	0.245499	0.09824	0.112866	0.108435	0.111108	0.109619	0.085222	0.093826	0.088751	0.07459	0.083581	0.108084	0.12293	0.132179	0.15914	0.15664	0.140015	0.121973	0.114121	0.128622	0.132079	0.121779	0.110546	0.09899
495	453	446	669	653	0.554437	77347	2.40162	3.54434	0	71.907	900.442	0.764645	405.224	15.5236	0.0686621	0.018053	0.329085	0.000325912	403.229	15.5009	0.0676427	0.0180582	0.332324	0.000326099	0.46733	0.183975	0.172825	0.204113	0.216992	0.19625	0.176042	0.160604	0.202302	0.215899	0.178834	0.170293	0.219403	0.242107	0.233984	0.226	0.264227	0.242708	0.238258	0.225955	0.285253	0.244377	0.201371	0.20456	0.207587
562	779	850	1343	1034	0.508756	586651	1.50586	3.74947	-0.00211864	76.5887	804.372	0.760677	217.462	11.2826	0.0928127	0.0264699	0.327675	0.000700656	212.133	11.1401	0.093791	0.0265704	0.344109	0.000705984	0.284219	0.459717	0.07403	0.09209	0.088308	0.098942	0.112578	0.095196	0.096944	0.091717	0.07194	0.079806	0.112679	0.137188	0.137259	0.131021	0.134293	0.128616	0.113546	0.087393	0.108397	0.131646	0.119446	0.11846	0.092663
564	540	585	760	792	0.405615	150144	1.21141	3.6531	-0.0107527	81.9345	976.507	0.72173	1172.82	26.3718	0.0408483	0.0110101	0.334154	0.000121222	1178.18	26.4798	0.0407143	0.0109941	0.331374	0.00012087	0.522892	0.71951	0.070044	0.106355	0.121856	0.104408	0.090536	0.070979	0.08097	0.070163	0.068595	0.092753	0.133171	0.128703	0.12221	0.129978	0.144711	0.128193	0.109433	0.103397	0.128012	0.129136	0.092182	0.09434	0.093907
561	690	687	1001	1004	0.596425	379382	1.00692	3.6516	0.0102339	72.6978	825.42	0.784685	255.85	12.2433	0.0853116	0.0241606	0.361861	0.000583734	252.629	12.181	0.0858873	0.0242044	0.369785	0.000585854	0.147723	0.730335	0.114402	0.142776	0.144962	0.132567	0.107856	0.090322	0.109532	0.10617	0.09188	0.090473	0.126649	0.14057	0.14801	0.144799	0.137796	0.108133	0.098353	0.100815	0.135591	0.147141	0.127723	0.100319	0.09094
729	2520	2592	794	836	0.420308	179692	2.6221	3.61307	-0.00531915	71.4274	1100.93	0.751274	396.787	15.1331	0.0718354	0.0186505	0.436374	0.00034784	397.812	15.1341	0.0717812	0.0186605	0.435016	0.000348214	0.318435	0.971325	0.11855	0.140842	0.151577	0.157061	0.134764	0.094689	0.112132	0.141447	0.109411	0.088737	0.13223	0.162506	0.134397	0.108901	0.130498	0.13996	0.137347	0.141991	0.151851	0.154128	0.109364	0.099839	0.079763
485	419	573	738	809	0.401674	127244	1.49354	3.71224	-0.0122951	76.892	978.99	0.743288	770.29	21.3565	0.0499551	0.0132767	0.339157	0.000176271	761.376	21.2254	0.050421	0.0133121	0.346797	0.000177211	0.0934271	0.865493	0.135218	0.154259	0.149175	0.157464	0.12828	0.09732	0.138385	0.201	0.144534	0.120886	0.15825	0.185728	0.154592	0.173585	0.18844	0.175947	0.144641	0.167192	0.21829	0.231364	0.169571	0.175521	0.134586
522	424	442	682	636	0.598665	70544	1.20693	3.62791	0	57.9498	621.099	0.921524	1548.35	29.9408	0.0377559	0.00921984	0.356144	8.50055e-05	1526.74	29.7645	0.0383378	0.00922439	0.36519	8.50894e-05	0.287103	0.216368	0.182044	0.196892	0.171574	0.189122	0.203424	0.152124	0.188839	0.201329	0.150726	0.100081	0.179553	0.223462	0.21988	0.212183	0.200177	0.148013	0.142308	0.182871	0.240433	0.224511	0.178297	0.14843	0.139584
481	386	384	551	556	0.693758	44385	1.02944	3.65417	-0.0294118	75.3737	728.932	0.770508	2004.39	34.6881	0.0313667	0.0077963	0.396702	6.07822e-05	1998.49	34.6697	0.0306814	0.00780427	0.398367	6.09066e-05	0.86448	0.250701	0.246414	0.2676	0.248867	0.267058	0.261134	0.222329	0.23978	0.259745	0.198562	0.18145	0.207533	0.243479	0.239858	0.267038	0.2597	0.232399	0.236962	0.260465	0.287837	0.26319	0.243225	0.245796	0.228307
535	467	467	644	644	0.576845	78164.5	1.02919	3.81126	0.00333333	71.1969	895.683	0.776286	1157.8	26.2743	0.0413947	0.0107359	0.309709	0.000115259	1144.36	26.1493	0.0411579	0.0107536	0.317362	0.00011564	0.212831	0.873098	0.203015	0.232422	0.197998	0.210062	0.236503	0.199971	0.197793	0.185164	0.145578	0.129848	0.217969	0.24072	0.209788	0.181245	0.203276	0.20407	0.191521	0.187635	0.208569	0.21202	0.180545	0.164532	0.119739
490	409	413	686	679	0.553896	87154.5	1.04028	3.6806	-0.00900901	64.9023	797.261	0.832281	1466	29.364	0.0381227	0.00945409	0.358926	8.93799e-05	1444.83	29.1637	0.0383996	0.00946628	0.367984	8.96105e-05	0.245131	0.0618076	0.126417	0.116251	0.122138	0.178198	0.188924	0.120182	0.138986	0.177909	0.11204	0.058928	0.089192	0.113978	0.115183	0.134685	0.152802	0.113855	0.105764	0.139519	0.171654	0.172206	0.155048	0.136608	0.102628
496	447	453	625	625	0.629071	67280.5	1.00855	3.811	0.00346021	67.9919	764.3	0.818484	1695.64	31.6796	0.0347678	0.0086866	0.335781	7.5457e-05	1682.71	31.4863	0.0354298	0.00870925	0.340649	7.5851e-05	0.375109	0.300901	0.164536	0.171707	0.129251	0.117849	0.125112	0.111131	0.145748	0.156716	0.135393	0.132849	0.197392	0.217077	0.211622	0.232486	0.258343	0.213663	0.173353	0.185409	0.2565	0.23214	0.158714	0.145097	0.123863
711	2535	2566	724	705	0.561873	103240	1.8476	3.63743	0	60.5048	747.456	0.873049	1079.54	24.9321	0.0453272	0.0108982	0.43287	0.00011877	1071.11	24.8503	0.0456891	0.0109136	0.43734	0.000119107	0.756946	0.764466	0.070058	0.072092	0.080325	0.110849	0.098962	0.056394	0.055848	0.100099	0.110615	0.119534	0.139735	0.126488	0.087472	0.058206	0.105397	0.123785	0.137943	0.118353	0.145342	0.145119	0.102705	0.076084	0.065335
698	2547	2605	888	861	0.380565	193225	1.17692	3.52189	-0.00168919	70.9815	910.749	0.772436	232.675	11.3499	0.0947457	0.0255879	0.424105	0.000654741	224.608	11.3018	0.094604	0.0255873	0.444163	0.000654711	0.247513	0.58339	0.083895	0.102271	0.108813	0.095198	0.080712	0.07282	0.075449	0.087749	0.095487	0.097054	0.094925	0.095053	0.091963	0.082779	0.104315	0.117315	0.115694	0.096761	0.104055	0.111531	0.095739	0.0776	0.065803
559	779	849	1343	1032	0.501504	585102	1.50457	3.80456	0.00108814	76.2397	789.446	0.766191	169.476	9.95784	0.103917	0.0300038	0.331932	0.000900225	165.019	9.82181	0.105087	0.0301289	0.349489	0.000907751	0.220603	0.157371	0.111409	0.138747	0.134031	0.126181	0.149138	0.129434	0.119133	0.090065	0.091854	0.082877	0.128457	0.155092	0.169015	0.154421	0.144636	0.126896	0.128514	0.133211	0.148417	0.147411	0.129842	0.114456	0.105358
531	432	427	595	596	0.661605	65788	11.6131	3.62324	0.0141844	67.9552	744.151	0.830091	691.701	20.0684	0.0535124	0.0137398	0.497004	0.000188782	689.149	20.0759	0.0540075	0.0137466	0.498758	0.000188969	0.882713	0.0921142	0.185744	0.199784	0.190349	0.185549	0.168855	0.135777	0.130505	0.127314	0.070294	0.09079	0.167271	0.188915	0.147273	0.138493	0.19715	0.189402	0.182557	0.17445	0.219906	0.196404	0.15473	0.116094	0.106228
739	2530	2596	860	877	0.357277	216412	1.6417	3.64632	0.00313972	74.2802	1132.34	0.710643	116.066	8.10195	0.128028	0.0354105	0.446347	0.00125391	117.578	8.1491	0.12715	0.0353235	0.435754	0.00124775	0.805397	0.133469	0.156626	0.16508	0.178298	0.189319	0.180141	0.155517	0.156015	0.161281	0.154576	0.16722	0.177548	0.179158	0.143505	0.138422	0.153791	0.188314	0.175434	0.160507	0.172043	0.199357	0.176839	0.140159	0.133762
484	338	337	530	529	0.69399	34826.5	1.06227	3.79006	-0.00558659	76.0903	550.824	0.795515	858.479	22.5672	0.0470562	0.0113328	0.45245	0.000128432	859.688	22.5671	0.0477464	0.0113284	0.451008	0.000128333	0.109088	0.277886	0.140728	0.167553	0.165092	0.194549	0.183762	0.148331	0.110954	0.099491	0.089307	0.138471	0.221767	0.213199	0.162589	0.153888	0.19084	0.17491	0.148706	0.1914	0.219024	0.196323	0.138585	0.17686	0.14798
478	359	363	555	558	0.672909	44510.5	1.02428	3.46701	0	72.9553	644.817	0.802754	1221.54	26.8734	0.0408184	0.00981753	0.409425	9.63839e-05	1244.65	27.082	0.040486	0.0097991	0.398603	9.60224e-05	0.280477	0.572545	0.152499	0.195765	0.191638	0.210724	0.190904	0.129115	0.145973	0.177531	0.142009	0.126497	0.199783	0.228237	0.182642	0.168336	0.211563	0.201341	0.161793	0.160822	0.201351	0.206757	0.153481	0.154248	0.116116
475	346	346	529	528	0.665818	37747.5	1.02943	3.723	-0.00473934	79.163	670.113	0.748023	585.604	18.5271	0.05833	0.0139801	0.419864	0.000195442	573.388	18.3725	0.0581806	0.0140048	0.431447	0.000196135	0.423518	0.188477	0.134251	0.185786	0.187397	0.195528	0.159038	0.138247	0.152432	0.176655	0.140972	0.141056	0.175144	0.192551	0.183195	0.169261	0.166721	0.156675	0.155163	0.152522	0.191423	0.189277	0.167097	0.170275	0.160762
497	419	419	581	576	0.649553	52053.5	1.11081	3.65145	0.0041841	69.9402	672.007	0.822173	1315.93	27.9055	0.0386453	0.00955353	0.392917	9.12699e-05	1315.8	27.8854	0.0389042	0.00956393	0.392605	9.14688e-05	0.54286	0.729089	0.133202	0.152685	0.16614	0.179657	0.187593	0.164367	0.134463	0.09951	0.087474	0.12774	0.171583	0.166647	0.144135	0.183077	0.215031	0.182825	0.139775	0.165993	0.21517	0.204481	0.159413	0.160951	0.145375
547	333	334	532	534	0.710684	36430.5	1.03325	3.6	0	71.2645	521.225	0.847038	1923.2	33.835	0.0322928	0.00766977	0.501254	5.88254e-05	1967.3	34.0363	0.0319316	0.00767548	0.489604	5.8913e-05	0.922382	0.924094	0.228892	0.244057	0.224521	0.231452	0.214532	0.160718	0.172352	0.197624	0.161971	0.169587	0.2203	0.226676	0.198049	0.198927	0.222207	0.243364	0.240783	0.217191	0.222488	0.213999	0.180833	0.189465	0.170049
517	334	345	551	544	0.709309	41427	1.35379	3.77974	-0.0133333	68.9216	582.849	0.848939	1804.41	32.5924	0.0339811	0.00816599	0.424762	6.66835e-05	1779.45	32.3854	0.0341171	0.00820015	0.432663	6.72424e-05	0.732601	0.369922	0.178766	0.211583	0.176459	0.169417	0.156165	0.156919	0.137447	0.125198	0.090546	0.124229	0.20812	0.209368	0.196892	0.173286	0.213797	0.191737	0.177439	0.151324	0.180455	0.170488	0.113797	0.13253	0.118827
728	2569	2545	873	957	0.354683	265603	1.12679	3.58368	0.00138696	75.083	957.523	0.743324	84.5382	6.91302	0.144992	0.0428755	0.36206	0.00183831	82.654	6.85976	0.145377	0.0429553	0.376248	0.00184516	0.441879	0.0578362	0.080046	0.092178	0.123559	0.153936	0.118123	0.047759	0.055403	0.105119	0.117633	0.11056	0.132918	0.132402	0.088181	0.083711	0.120918	0.141582	0.122936	0.110317	0.114791	0.105266	0.065336	0.039042	0.054195
714	2550	2637	942	845	0.451288	250076	2.89294	3.73832	0.003125	77.566	1203.2	0.669844	653.89	19.4843	0.0558202	0.0149407	0.401554	0.000223224	635.392	19.2548	0.0562052	0.0149837	0.418459	0.000224511	0.167482	0.691456	0.14774	0.158559	0.166079	0.18013	0.152159	0.115305	0.132166	0.163652	0.14422	0.130508	0.14356	0.157054	0.151985	0.131884	0.129257	0.143608	0.150657	0.145337	0.142318	0.140179	0.133778	0.125528	0.121476
735	2595	2547	882	877	0.553157	227749	3.36196	3.57728	0.00186916	67.2374	891.82	0.816847	431.933	15.5495	0.0714933	0.018242	0.566155	0.000332771	432.652	15.5662	0.0714856	0.018238	0.565084	0.000332623	0.858428	0.951362	0.106657	0.121354	0.130032	0.145543	0.13944	0.108281	0.106092	0.126595	0.118868	0.105452	0.118594	0.114826	0.110635	0.103742	0.134812	0.13632	0.154822	0.16039	0.175827	0.160177	0.13604	0.108531	0.083319
734	2566	2551	841	844	0.647714	225115	1	3.72023	-0.00189753	73.3161	924.43	0.740297	264.555	12.1644	0.087971	0.0242515	0.608588	0.000588135	262.562	12.0827	0.0888554	0.0243015	0.611791	0.000590565	0.648163	0.980656	0.107098	0.120668	0.092539	0.079889	0.092892	0.083418	0.069406	0.062531	0.075359	0.09697	0.1347	0.138635	0.118476	0.109853	0.126161	0.120066	0.128795	0.155449	0.179068	0.16582	0.112089	0.082708	0.079575
541	503	561	609	877	0.328591	118954	2.10462	3.53653	0.00628931	74.0983	864.235	0.797325	766.246	21.4424	0.049225	0.0129092	0.313327	0.000166647	767.934	21.4649	0.0496579	0.0129023	0.311753	0.00016647	0.426096	0.631909	0.154933	0.171615	0.156748	0.153393	0.140173	0.108386	0.134983	0.146681	0.091451	0.115245	0.164411	0.182599	0.147253	0.181249	0.194426	0.157019	0.106547	0.141681	0.191512	0.191959	0.140844	0.166471	0.136482
726	3100	2559	5419	4337	0.0361535	764811	1.15803	3.19533	-0.000307314	82.0523	1244.07	2.83325	50.5627	4.65743	0.21992	0.0728188	0.601305	0.00530258	44.508	4.50067	0.222553	0.0730464	0.649044	0.00533578	0.795605	0.240317	0.077297	0.111657	0.113051	0.136728	0.119146	0.091477	0.086725	0.133056	0.127052	0.120462	0.131803	0.149145	0.121679	0.08448	0.106223	0.144999	0.139148	0.105354	0.105346	0.119847	0.095404	0.084669	0.078304
521	430	437	708	692	0.545004	97134	1.05594	3.69382	0	65.5523	893.268	0.808522	730.917	20.6862	0.0528189	0.0135579	0.315913	0.000183815	725.906	20.6626	0.0530787	0.0135585	0.320448	0.000183833	0.451088	0.701688	0.15935	0.171411	0.1266	0.104522	0.084127	0.086359	0.100094	0.112248	0.075616	0.11524	0.179005	0.194443	0.151923	0.144793	0.157458	0.148422	0.153421	0.165772	0.202051	0.18692	0.137412	0.090288	0.08301
715	2621	2572	817	772	0.429341	152225	1.3947	3.76645	0.0127932	71.0417	1122.83	0.745318	406.217	15.4776	0.0687308	0.0184075	0.401325	0.000338837	397.874	15.337	0.0694067	0.0184517	0.413724	0.000340466	0.534076	0.203937	0.111888	0.137794	0.150857	0.150676	0.12957	0.087865	0.095659	0.121503	0.114943	0.101678	0.115596	0.123954	0.096749	0.085553	0.114088	0.132819	0.131117	0.131792	0.149855	0.14526	0.100542	0.070774	0.072044
550	410	399	578	560	0.684781	51644.5	2.08723	3.5873	0	73.1407	711.168	0.891324	1190.65	26.7099	0.0403141	0.00997119	0.38786	9.94246e-05	1175.71	26.5975	0.0401623	0.00996595	0.395224	9.93201e-05	0.595074	0.819803	0.191997	0.21857	0.200667	0.188885	0.175427	0.156172	0.194804	0.189105	0.13702	0.137225	0.221947	0.220981	0.205573	0.201585	0.230482	0.198057	0.173023	0.192593	0.215891	0.195397	0.146504	0.124905	0.110836
743	2536	2531	908	854	0.398529	237868	5.579	3.58368	0	71.4089	1063.45	0.735939	201.209	10.8247	0.0963497	0.0269324	0.353634	0.000725353	198.096	10.7482	0.0962663	0.0269896	0.364489	0.00072844	0.71575	0.0113284	0.111242	0.119925	0.111969	0.148507	0.123604	0.075855	0.078374	0.123627	0.116402	0.101258	0.12248	0.134451	0.119146	0.118039	0.124189	0.122159	0.107907	0.136745	0.167887	0.156601	0.119278	0.108547	0.084123
508	488	486	762	769	0.423341	121940	1.0153	3.65315	0	70.3812	1069.73	0.73885	113.647	8.08573	0.126681	0.0353184	0.390682	0.00124739	113.729	8.08608	0.12638	0.0353118	0.390421	0.00124692	0.277424	0.714427	0.163849	0.206408	0.204296	0.210298	0.173367	0.137313	0.137132	0.182682	0.14284	0.13176	0.192007	0.216051	0.177947	0.148389	0.164432	0.168032	0.145282	0.157941	0.180848	0.201723	0.153117	0.160565	0.137962
533	444	439	610	608	0.638719	59274	1.67985	3.53986	0.00729927	68.8772	676.133	0.82979	1794.43	32.6399	0.0336738	0.00835572	0.371163	6.98181e-05	1791.64	32.5663	0.0338775	0.00836359	0.372189	6.99496e-05	0.415504	0.724125	0.166937	0.185145	0.165013	0.137198	0.120847	0.123833	0.188751	0.198117	0.151974	0.16164	0.221318	0.235326	0.183091	0.202114	0.222678	0.206562	0.168246	0.171037	0.19899	0.192985	0.151947	0.164679	0.148362
706	2685	2619	896	779	0.377577	176667	1.05872	3.69948	-0.0017331	77.0054	1126.29	0.706363	226.959	11.4822	0.0911588	0.0248241	0.436212	0.000616238	226.572	11.4605	0.0918536	0.0248532	0.437226	0.000617682	0.546479	0.528342	0.188208	0.214368	0.241229	0.276598	0.249843	0.20795	0.200238	0.232991	0.219185	0.208254	0.238827	0.259553	0.222539	0.194463	0.227524	0.253207	0.249513	0.265816	0.286249	0.258166	0.203635	0.207523	0.224437
492	477	476	688	689	0.540727	95132	1.0082	3.7983	0.0171429	67.871	954.503	0.785761	579.951	18.5067	0.0581824	0.0152944	0.293043	0.000233919	577.679	18.4915	0.0584016	0.0152954	0.295748	0.00023395	0.0241484	0.129683	0.180049	0.224715	0.193576	0.171828	0.150312	0.125249	0.118809	0.102336	0.082315	0.132947	0.204385	0.20035	0.178528	0.188553	0.206125	0.166201	0.149863	0.174796	0.224073	0.203093	0.150796	0.137899	0.125783
725	2574	2546	745	815	0.464622	144576	1.48655	3.80726	0.0022779	72.476	976.075	0.750433	220.006	11.3246	0.0925459	0.0253363	0.38336	0.000641931	217.763	11.2518	0.0929139	0.0253892	0.389599	0.00064461	0.143601	0.865597	0.103401	0.119877	0.131228	0.151518	0.13344	0.104437	0.126926	0.151011	0.119642	0.105752	0.132063	0.126905	0.10321	0.103237	0.134175	0.154536	0.160483	0.159869	0.168627	0.167602	0.121229	0.07172	0.0775
544	354	351	528	532	0.69875	35889	1.04213	3.63229	0	72.8489	520.994	0.833152	1818.77	32.779	0.0335057	0.00790781	0.497979	6.25335e-05	1829.6	32.9115	0.0333207	0.00790972	0.494603	6.25637e-05	0.517623	0.0752832	0.144625	0.16439	0.134979	0.149593	0.182445	0.145885	0.160294	0.152311	0.10988	0.115238	0.199992	0.200338	0.165728	0.159373	0.210765	0.183812	0.165699	0.1381	0.192719	0.17835	0.139437	0.128029	0.113257
738	2590	2534	909	858	0.444645	238551	2.94036	3.72924	0.005	71.52	1034.43	0.749752	582.243	18.5408	0.0576478	0.0156201	0.359063	0.000243988	575.311	18.4029	0.0579485	0.0156648	0.366513	0.000245387	0.697942	0.677701	0.117323	0.135209	0.109667	0.133887	0.130926	0.122865	0.123871	0.165531	0.128451	0.108826	0.130698	0.156999	0.135988	0.113387	0.117288	0.121282	0.137843	0.165664	0.1662	0.158908	0.114639	0.095897	0.078318
502	418	434	668	711	0.511961	88501.5	1.16466	3.42609	-0.00291545	68.9356	818.48	0.793501	1636.92	31.1305	0.0354339	0.00907754	0.30446	8.24018e-05	1649.15	31.2256	0.0349297	0.00907186	0.29916	8.22987e-05	0.134613	0.791849	0.14656	0.161341	0.168025	0.191563	0.179038	0.106601	0.133336	0.136937	0.090083	0.098765	0.185712	0.207434	0.169803	0.16508	0.167529	0.175148	0.167305	0.156571	0.177108	0.175336	0.131259	0.12854	0.12162
542	340	351	539	538	0.66961	41613.5	1.12268	3.57073	0.00492611	75.7915	750.55	0.7741	843.782	22.4489	0.0474253	0.0119589	0.391094	0.000143015	828.301	22.2904	0.047564	0.0119735	0.402354	0.000143365	0.305646	0.47325	0.172476	0.197566	0.188457	0.197696	0.197285	0.1432	0.137593	0.134062	0.117198	0.112579	0.150601	0.162009	0.169376	0.174438	0.159296	0.106545	0.120544	0.183052	0.223221	0.155328	0.10946	0.149135	0.146173
488	399	381	582	562	0.591277	47366	1.13025	3.50198	0.0318725	68.8604	662.152	0.912068	2041.67	34.9129	0.0310292	0.00760132	0.406299	5.778e-05	2055.13	35.0716	0.0307139	0.00758746	0.401869	5.75696e-05	0.661717	0.785443	0.206737	0.232469	0.224261	0.199528	0.181865	0.180202	0.179274	0.162806	0.13726	0.157339	0.183462	0.181398	0.16993	0.19182	0.245168	0.223653	0.196484	0.189112	0.262386	0.263563	0.206062	0.193529	0.182129
722	2509	2601	810	922	0.434238	206834	1.11141	3.56627	-0.0103627	77.6347	1200.32	0.733709	340.311	14.1347	0.0745024	0.0201968	0.391109	0.000407909	342.133	14.1756	0.0745351	0.0201876	0.387899	0.000407538	0.875771	0.545093	0.095918	0.134031	0.129015	0.13573	0.114329	0.082007	0.098156	0.140774	0.139326	0.123586	0.119385	0.109639	0.096895	0.097878	0.109968	0.127278	0.129244	0.122106	0.1123	0.115436	0.0915	0.074281	0.065689
0	1051	1090	1566	1525	0.158344	1044236	1.02618	3.69227	0.00104603	64.1701	201.635	1.25599	767.923	21.5184	0.0480158	0.0145187	0.188529	0.000210794	761.047	21.4169	0.0484319	0.0145371	0.195535	0.000211327	0.242962	0.490575	0.099481	0.103026	0.103594	0.10334	0.10319	0.093415	0.079446	0.062334	0.101152	0.171387	0.238868	0.239952	0.169	0.126621	0.139962	0.151244	0.111571	0.095259	0.109363	0.145592	0.116978	0.071596	0.06074
1	636	633	1170	1207	0.190914	354150	1.05969	3.75619	0.0019084	59.6887	156.23	1.93476	1131.81	26.2236	0.0395833	0.0121207	0.141525	0.000146913	1105.16	25.8916	0.0401393	0.0121587	0.161	0.000147834	0.465148	0.253557	0.150008	0.157544	0.150398	0.185996	0.230422	0.178416	0.144337	0.117125	0.132993	0.136076	0.158844	0.176265	0.177963	0.162319	0.134396	0.12854	0.148239	0.15753	0.136497	0.101977	0.058876	0.055169	0.09098
2	1126	1106	1423	1429	0.0986652	730284	5.51863	3.72858	0.000495786	75.6042	121.991	1.2157	679.636	20.4668	0.0492618	0.0153524	0.128627	0.000235696	670.394	20.316	0.0497174	0.0153783	0.140145	0.000236491	0.434986	0.540838	0.123949	0.132385	0.149441	0.176698	0.213697	0.182191	0.133725	0.105069	0.122831	0.180441	0.257378	0.290545	0.19977	0.187452	0.192117	0.207792	0.15247	0.143297	0.182537	0.233424	0.142568	0.08627	0.097883
3	442	470	1558	995	0.148433	622657	1.5502	3.40476	-0.00216763	72.295	191.464	1.08247	411.876	15.8634	0.0635975	0.0197661	0.154214	0.0003907	408.506	15.7933	0.0637941	0.019782	0.161073	0.000391329	0.402787	0.127207	0.103475	0.110661	0.091783	0.105329	0.169901	0.163613	0.138613	0.100316	0.096932	0.149966	0.22978	0.257458	0.197351	0.213539	0.206361	0.172859	0.155921	0.216463	0.271201	0.238755	0.115256	0.055812	0.072809
4	1256	1218	1999	1765	0.0937998	1.91238e+06	3.4235	3.73608	0.000592768	81.4971	224.022	0.898459	319.377	13.968	0.0716861	0.0223326	0.155389	0.000498745	315.91	13.897	0.0719551	0.0223608	0.164265	0.000500005	0.12184	0.16355	0.22674	0.230862	0.198668	0.257167	0.317097	0.223427	0.159661	0.191241	0.21852	0.197306	0.187038	0.174921	0.154438	0.18243	0.203534	0.171034	0.10358	0.152592	0.240172	0.279627	0.199045	0.158298	0.182733
5	619	605	955	992	0.208722	253048	1	3.77053	0.0011274	61.6165	221.101	1.53071	1498.3	30.2145	0.0337676	0.0104873	0.146892	0.000109984	1482.82	30.0622	0.0344197	0.0105024	0.15496	0.000110301	0.525712	0.817644	0.123641	0.142992	0.154064	0.174921	0.172259	0.128237	0.08523	0.062717	0.073633	0.094276	0.124434	0.177881	0.138722	0.153544	0.128174	0.143577	0.109057	0.143469	0.14794	0.136184	0.059358	0	0.055856
[truncated: 271 more rows]
[truncated: 732 more columns]

## Sheet: Mixture 6
Table S4 Colony information of Mixture 6
[truncated: 834 more rows]
[truncated: 732 more columns]

## Sheet: Mixture 7
Table S4 Colony information of Mixture 7
[truncated: 1,072 more rows]
[truncated: 732 more columns]

## Sheet: Mixture 8
Table S4 Colony information of Mixture 8
[truncated: 1,094 more rows]
[truncated: 732 more columns]
