# Supplementary material
Source: Research Square preprint supplement (doi:10.21203/rs.3.rs-9805857/v1)
Supplement: Supplementary file 2 [file 52b744443792c131e2e09546.docx]

### Supplementary data:

### RAcolony: A Multimodal Platform Integrating Raman Spectroscopy and Automated Imaging for Efficient Construction of Personalized Gut Microbiome Biobanks

Yang Yan†1, He Jiang†1, Jian-Bo Ma5, Min-Zhi Jiang1, Chen Chen1, Zi-Nuo An1, Xin-Yao Li1, Guozhong Chen1, Xiao-Yang Zhu1, Tian-Yu Li3, Yulin Wang1, Chang Liu1, An-Qi Zhao1, Xiao-Jia Han1, Dalei Wu*,1, Bei Li*,3,4, Shuang-Jiang Liu*,1,2

1State Key Laboratory of Microbial Technology, Shandong University, 72 Binhai Road, Jimo, Qingdao 266237, P.R. China

2State Key Laboratory of Microbial Diversity and Innovative Utilization, Institute of Microbiology, Chinese Academy of Sciences, No.1 Beichenxi Road, Chaoyang District, Beijing, P.R. China

3HOOKE Instruments Ltd., Changchun 130033, P.R. China

4State Key Laboratory of Advanced Manufacturing for Optical Systems, Changchun Institute of Optics, Fine Mechanics and Physics, Chinese Academy of Sciences, Changchun 130033, P. R. China

5Haining high-tech research institute, Jiaxing, Zhejiang 314408, P.R. China

*Corresponding authors:

Shuang-Jiang Liu (liusj @sdu.edu.cn)

Address: State Key Laboratory of Microbial technology, Shandong University, 72 Binhai Road, Jimo, Qingdao, P.R. China

Phone number: 0532-58630001

Bei Li (beili@ciomp.ac.cn)

Address: State Key Laboratory of Advanced Manufacturing for Optical Systems, Changchun Institute of Optics, Fine Mechanics and Physics, Chinese Academy of Sciences, Changchun 130033, P. R. China;

Phone number: 0431-81077008

Dalei Wu ([dlwu@sdu.edu.cn](mailto:dlwu@sdu.edu.cn))

Address: State Key Laboratory of Microbial technology, Shandong University, 72 Binhai Road, Jimo, Qingdao, P.R. China

Phone number: 0532-58631508

***Eubacterium*** ***kunpengii*****sp. nov.**

**Description of *Eubacterium******kunpengii***(kun.peng.i’i. N.L. gen. masc. n. *kunpengii,* of Kunpeng, referring to the Kunpeng, a giant creature in Chinese mythology that can transform between a massive fish (Kun) and a giant bird (Peng), symbolizing vastness and transformation)

The closest phylogenetic neighbor of strain NSJ-201T is *Eubacterium ventriosum* ATCC 27560T. *E. ventriosum* and strain NSJ-201T (16S rRNA sequence accession number in NCBI (National Center for Biotechnology Information is PZ194098) has a 16S rRNA gene identity of 97.25%. The phylogenetic tree shows that strain NSJ-201T clusters with other members of the genus *Eubacterium* (Figure SD-1a), suggesting strain NSJ-201T is a member of the genus *Eubacterium*. According to the phylogenominc tree (Figure SD-1b), the ANIs and dDDH values of genomes between strain NSJ-201T and phylogenomically neighbored genomes were calculated, and the highest ANI and dDDH values are 76.74 and 26.00%, respectively, between the query genome of *Eubacterium ventriosum* (GCA_000153885.1); and difference in % G+C between genomes of strain NSJ-201T and *Eubacterium ventriosum* (GCA_000153885.1) is 1.26; OrthoANI heatmap (Figure SD-1c) shows the phylogenomic status of the corresponding neighbor species based on OrthoANI values. Based on these results, we concluded that the strain NSJ-201T represents of new species of the genus *Eubacterium,* and the name *Eubacterium kunpengii* sp. nov. is proposed. The type strain NSJ-201T (=CGMCC 1.58803T) was isolated from the faeces of a healthy adult.

Figure
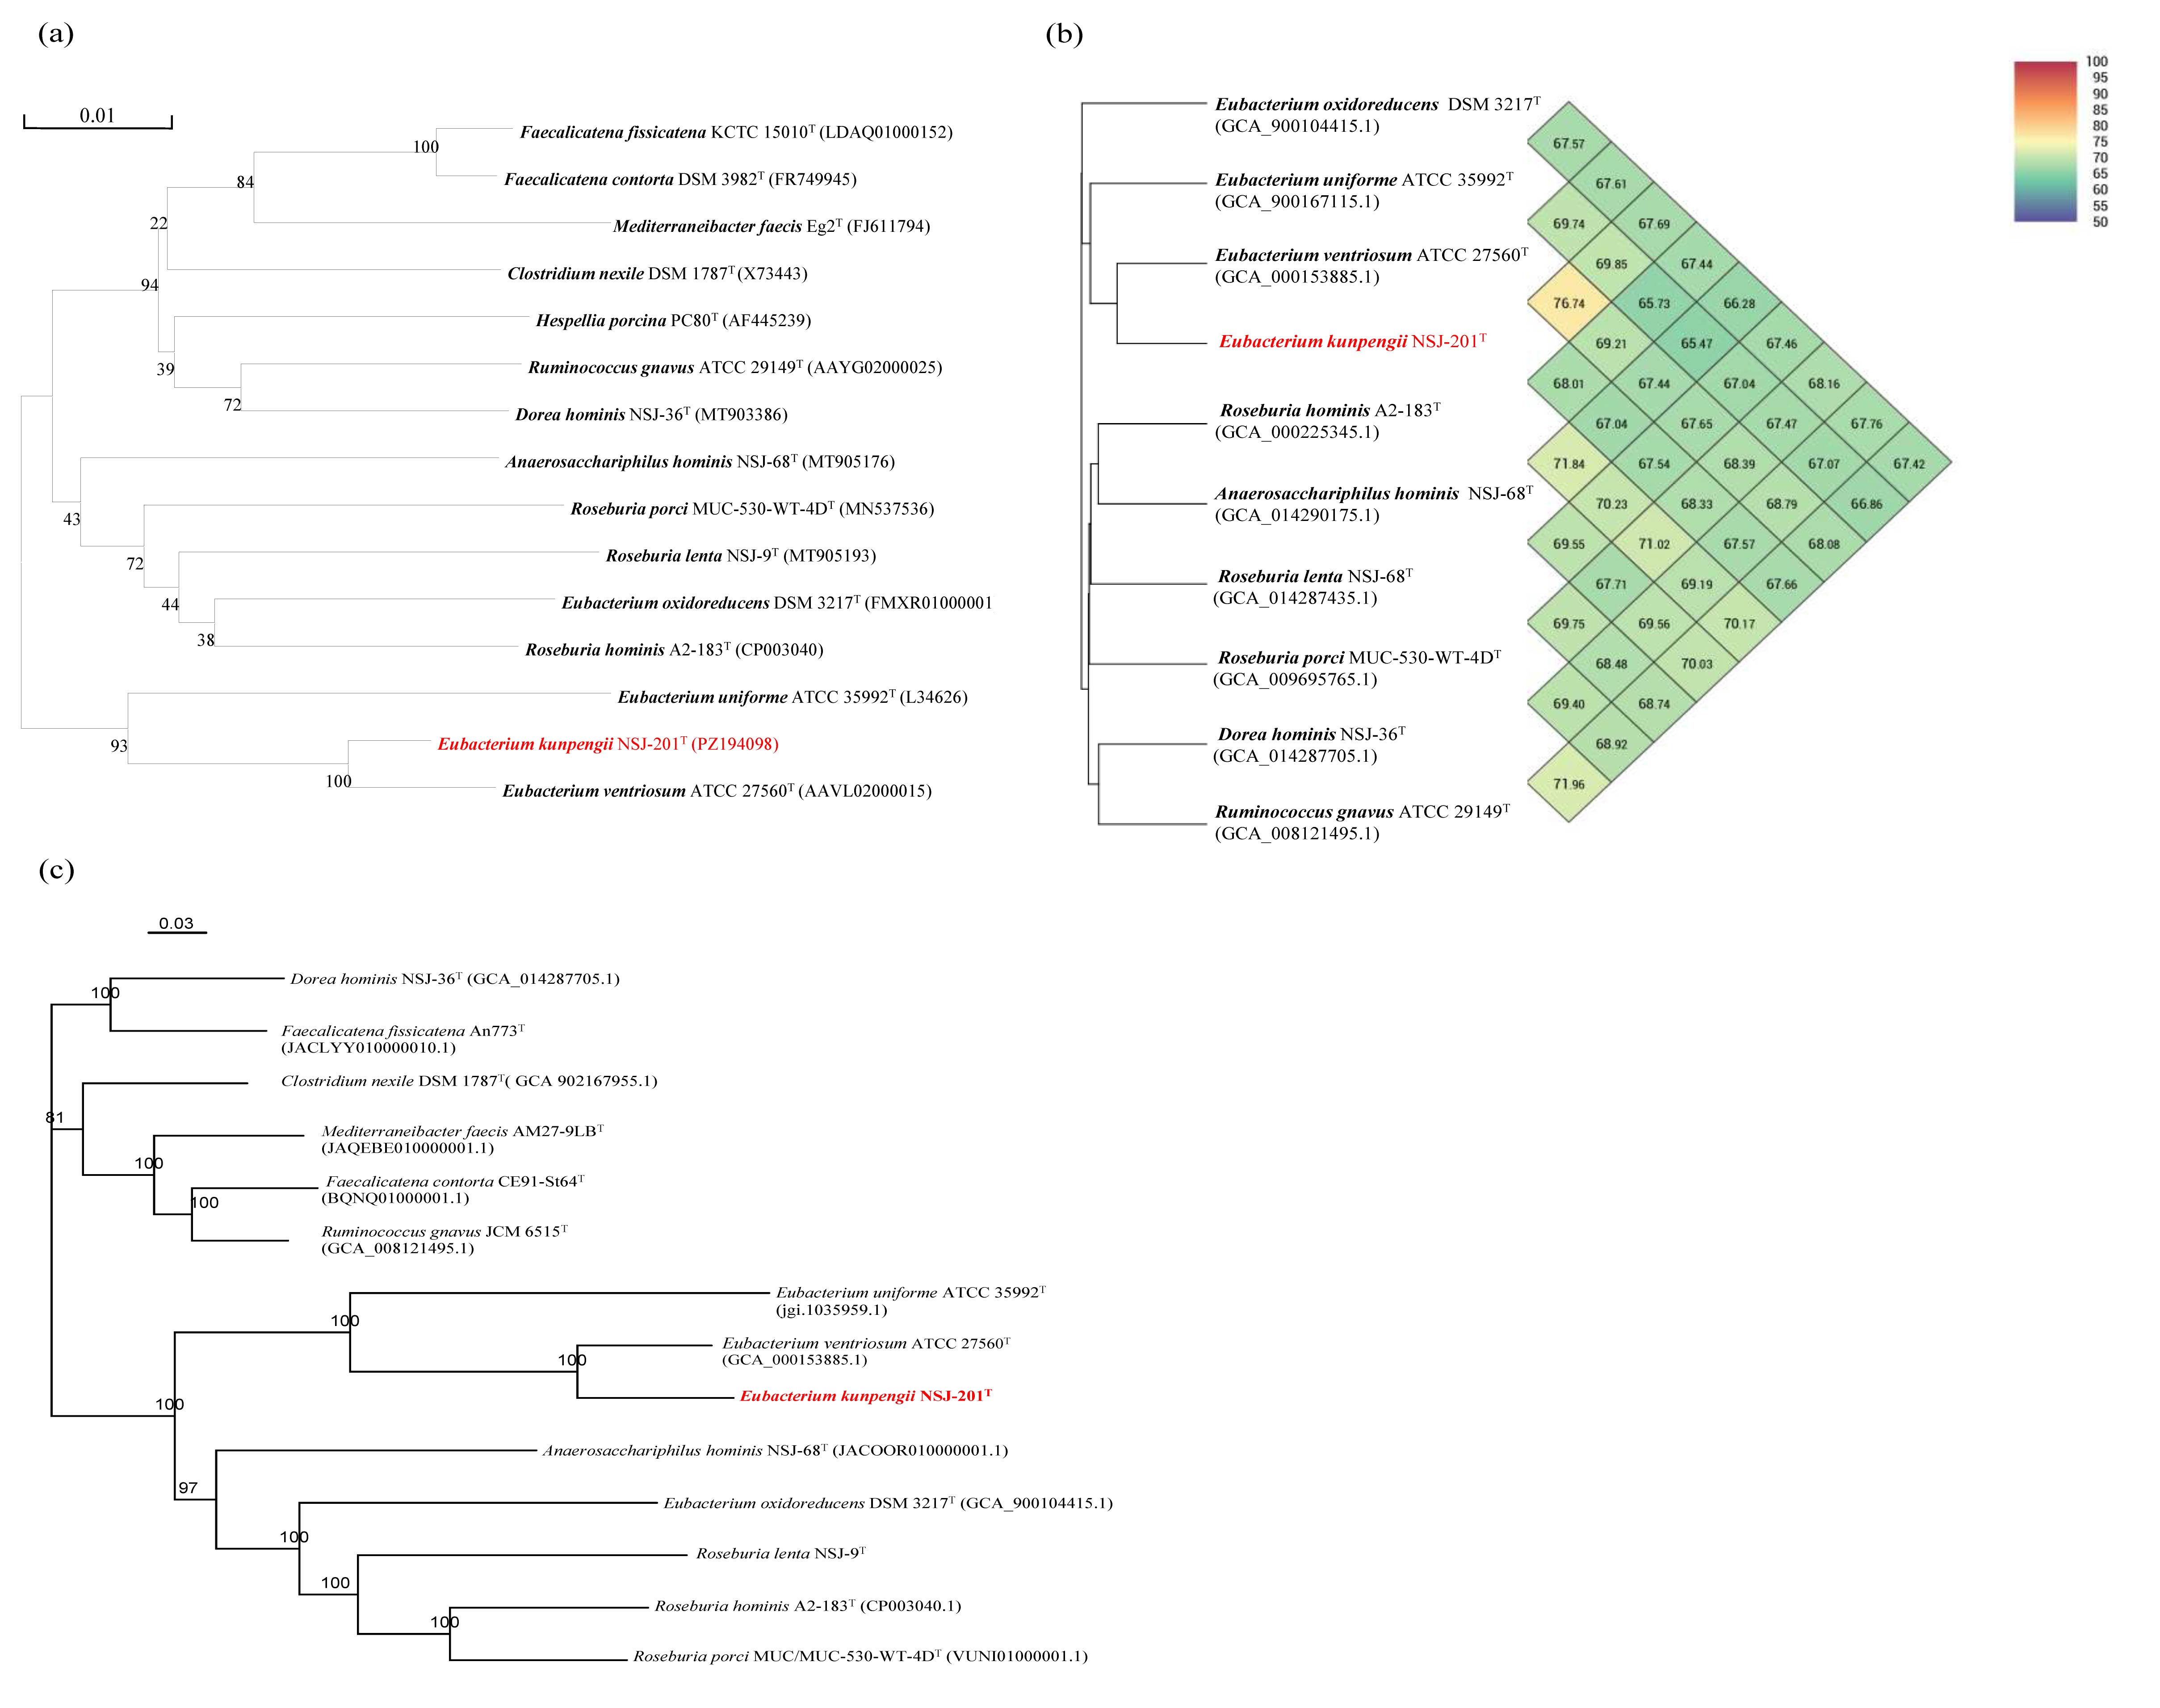
SD-1 (a) The Neighbour-joining phylogenetic tree based on 16S rRNA gene sequences of strain NSJ-201T. GenBank accession numbers are given in parentheses. Percentages of bootstrap support are shown at branch nodes. Bootstrap value was 1000. Bar: 0.01 substitutions per nucleotide position. The phylogenominc tree based on gemome-sequence-alignment (b) and OrthoANI heatmap (c) of strain NSJ-201T and its neighbor species. Refseq ID of representative genomes are given in parentheses. Percentages of bootstrap support are shown at branch nodes. Bar: 0.03 substitutions per nucleotide position.

***Mediterraneibacter segnis* sp. nov.**

**Description of *Mediterraneibacter segnis* sp. nov.** (se’gnis. L. masc. adj. *segnis*, slow, indicating the slow growth of the type strain)

Strain NSJ-207T (16S rRNA sequence accession number in NCBI is PZ194104) is phylogenetically closest to *Mediterraneibacter torques*, with 16S rRNA gene identity of 95.83%. Phylogenetic tree shows that strain NSJ-207T clusters with other members of the genus *Mediterraneibacter* (Figure SD-2a), suggesting strain NSJ-207T is a member of the genus *Mediterraneibacter*. The genome of strain NSJ-207T was sequenced and the NCBI accession number is JBWBFL000000000. According to the phylogenominc tree (Figure SD-2b), the ANIs and dDDH values of genomes between strain NSJ-207T (NCBI accession number is JBWBFL000000000) and phylogenomically neighbored genomes were calculated, and the highest ANI and dDDH values are 74.30 and 22.40%, respectively, between the query genome of *Mediterraneibacter torques* (GCA_044591705.1); and difference in % G+C between genomes of strain NSJ-207T and *Mediterraneibacter torques* (GCA_044591705.1) is 4.30; OrthoANI heatmap (Figure SD-2c) shows the phylogenomic status of the corresponding neighbor species based on OrthoANI values. Based on these results, we concluded that the strain NSJ-207T represents of new species of the genus *Mediterraneibacter*, and the name *Mediterraneibacter segnis* sp. nov. is proposed. The type strain NSJ-207T (=CGMCC 1.58809T) was isolated from the faeces of a healthy adult.


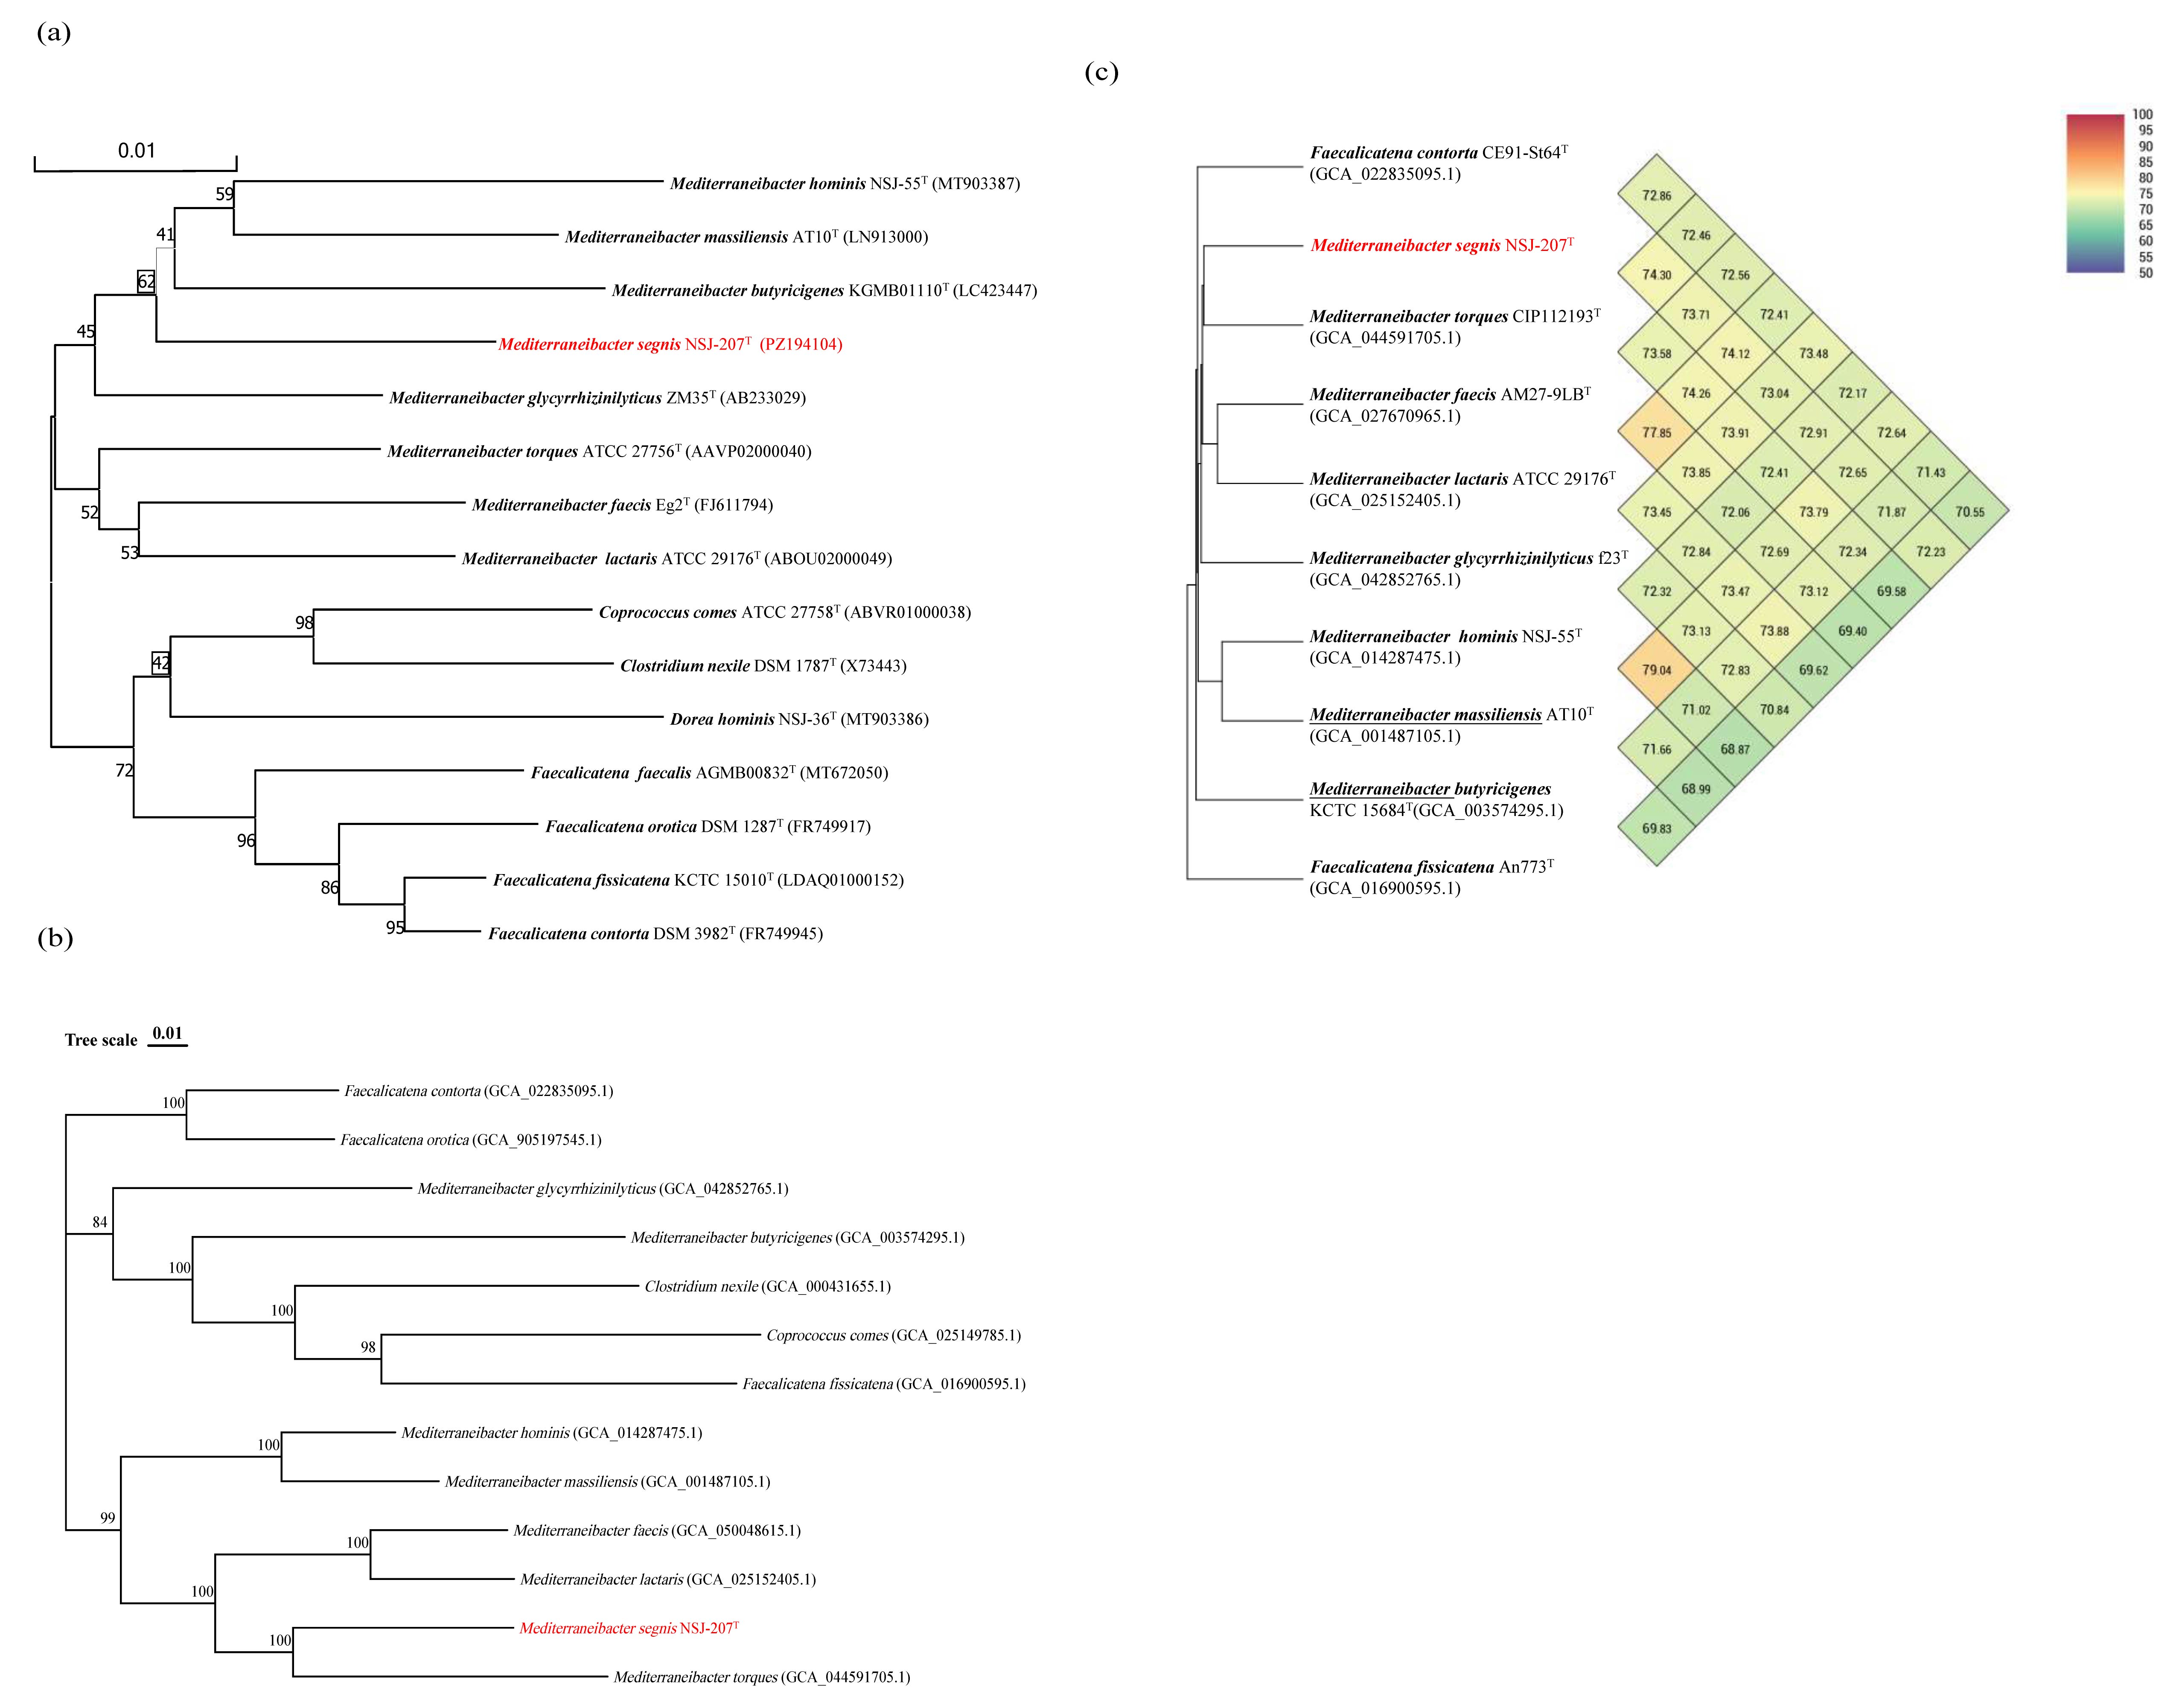


Figure SD-2 (a) The Neighbour-joining phylogenetic tree based on 16S rRNA gene sequences of strain NSJ-207T. GenBank accession numbers are given in parentheses. Percentages of bootstrap support are shown at branch nodes. Bootstrap value was 1000. Bar: 0.01 substitutions per nucleotide position. The phylogenominc tree based on gemome-sequence-alignment (b) and OrthoANI heatmap (c) of strain NSJ-207T and its neighbor species. Refseq ID of representative genomes are given in parentheses. Percentages of bootstrap support are shown at branch nodes. Bar: 0.01 substitutions per nucleotide position.

***Faecalimonas qinglongii* sp. nov.**

**Description of *Faecalimonas qinglongii* sp. nov.** (qing.long.i’i. N.L. gen. masc. n. *qinglongii*, of Qinglong, referring to the Azure Dragon, the guardian of the East in Chinese mythology)

Strain NSJ-200T (16S rRNA sequence accession number in NMDC is PZ194097) is phylogenetically closest to *Faecalimonas* *nexile*, with 16S rRNA gene identity of 95.83%. Phylogenetic tree shows that strain NSJ-200T clusters with other members of the genus *Faecalimonas* (Figure SD-3a), suggesting strain NSJ-200T is a member of the genus *Faecalimonas*. The genome of strain NSJ-200T was sequenced and the NCBI accession number is JBXEKU000000000. According to the phylogenominc tree (Figure SD-3b), the ANIs and dDDH values of genomes between strain NSJ-200T (NCBI accession number is JBXEKU000000000) and phylogenomically neighbored genomes were calculated, and the highest ANI and dDDH values are 73.46 and 33.10%, respectively, between the query genome of *Faecalimonas* *nexile* DSM 1787T (GCA_000431655.1); and difference in % G+C between genomes of strain NSJ-200T and *Faecalimonas* *nexile* DSM 1787T (GCA_000431655.1) is 8.80; OrthoANI heatmap (Figure SD-3c) shows the phylogenomic status of the corresponding neighbor species based on OrthoANI values. Based on these results, we concluded that the strain NSJ-200T represents of new species of the genus *Faecalimonas*, and the name *Faecalimonas qinglongii* sp. nov. is proposed. The type strain NSJ-200T (=CGMCC 1.58802T) was isolated from the faeces of a healthy adult.


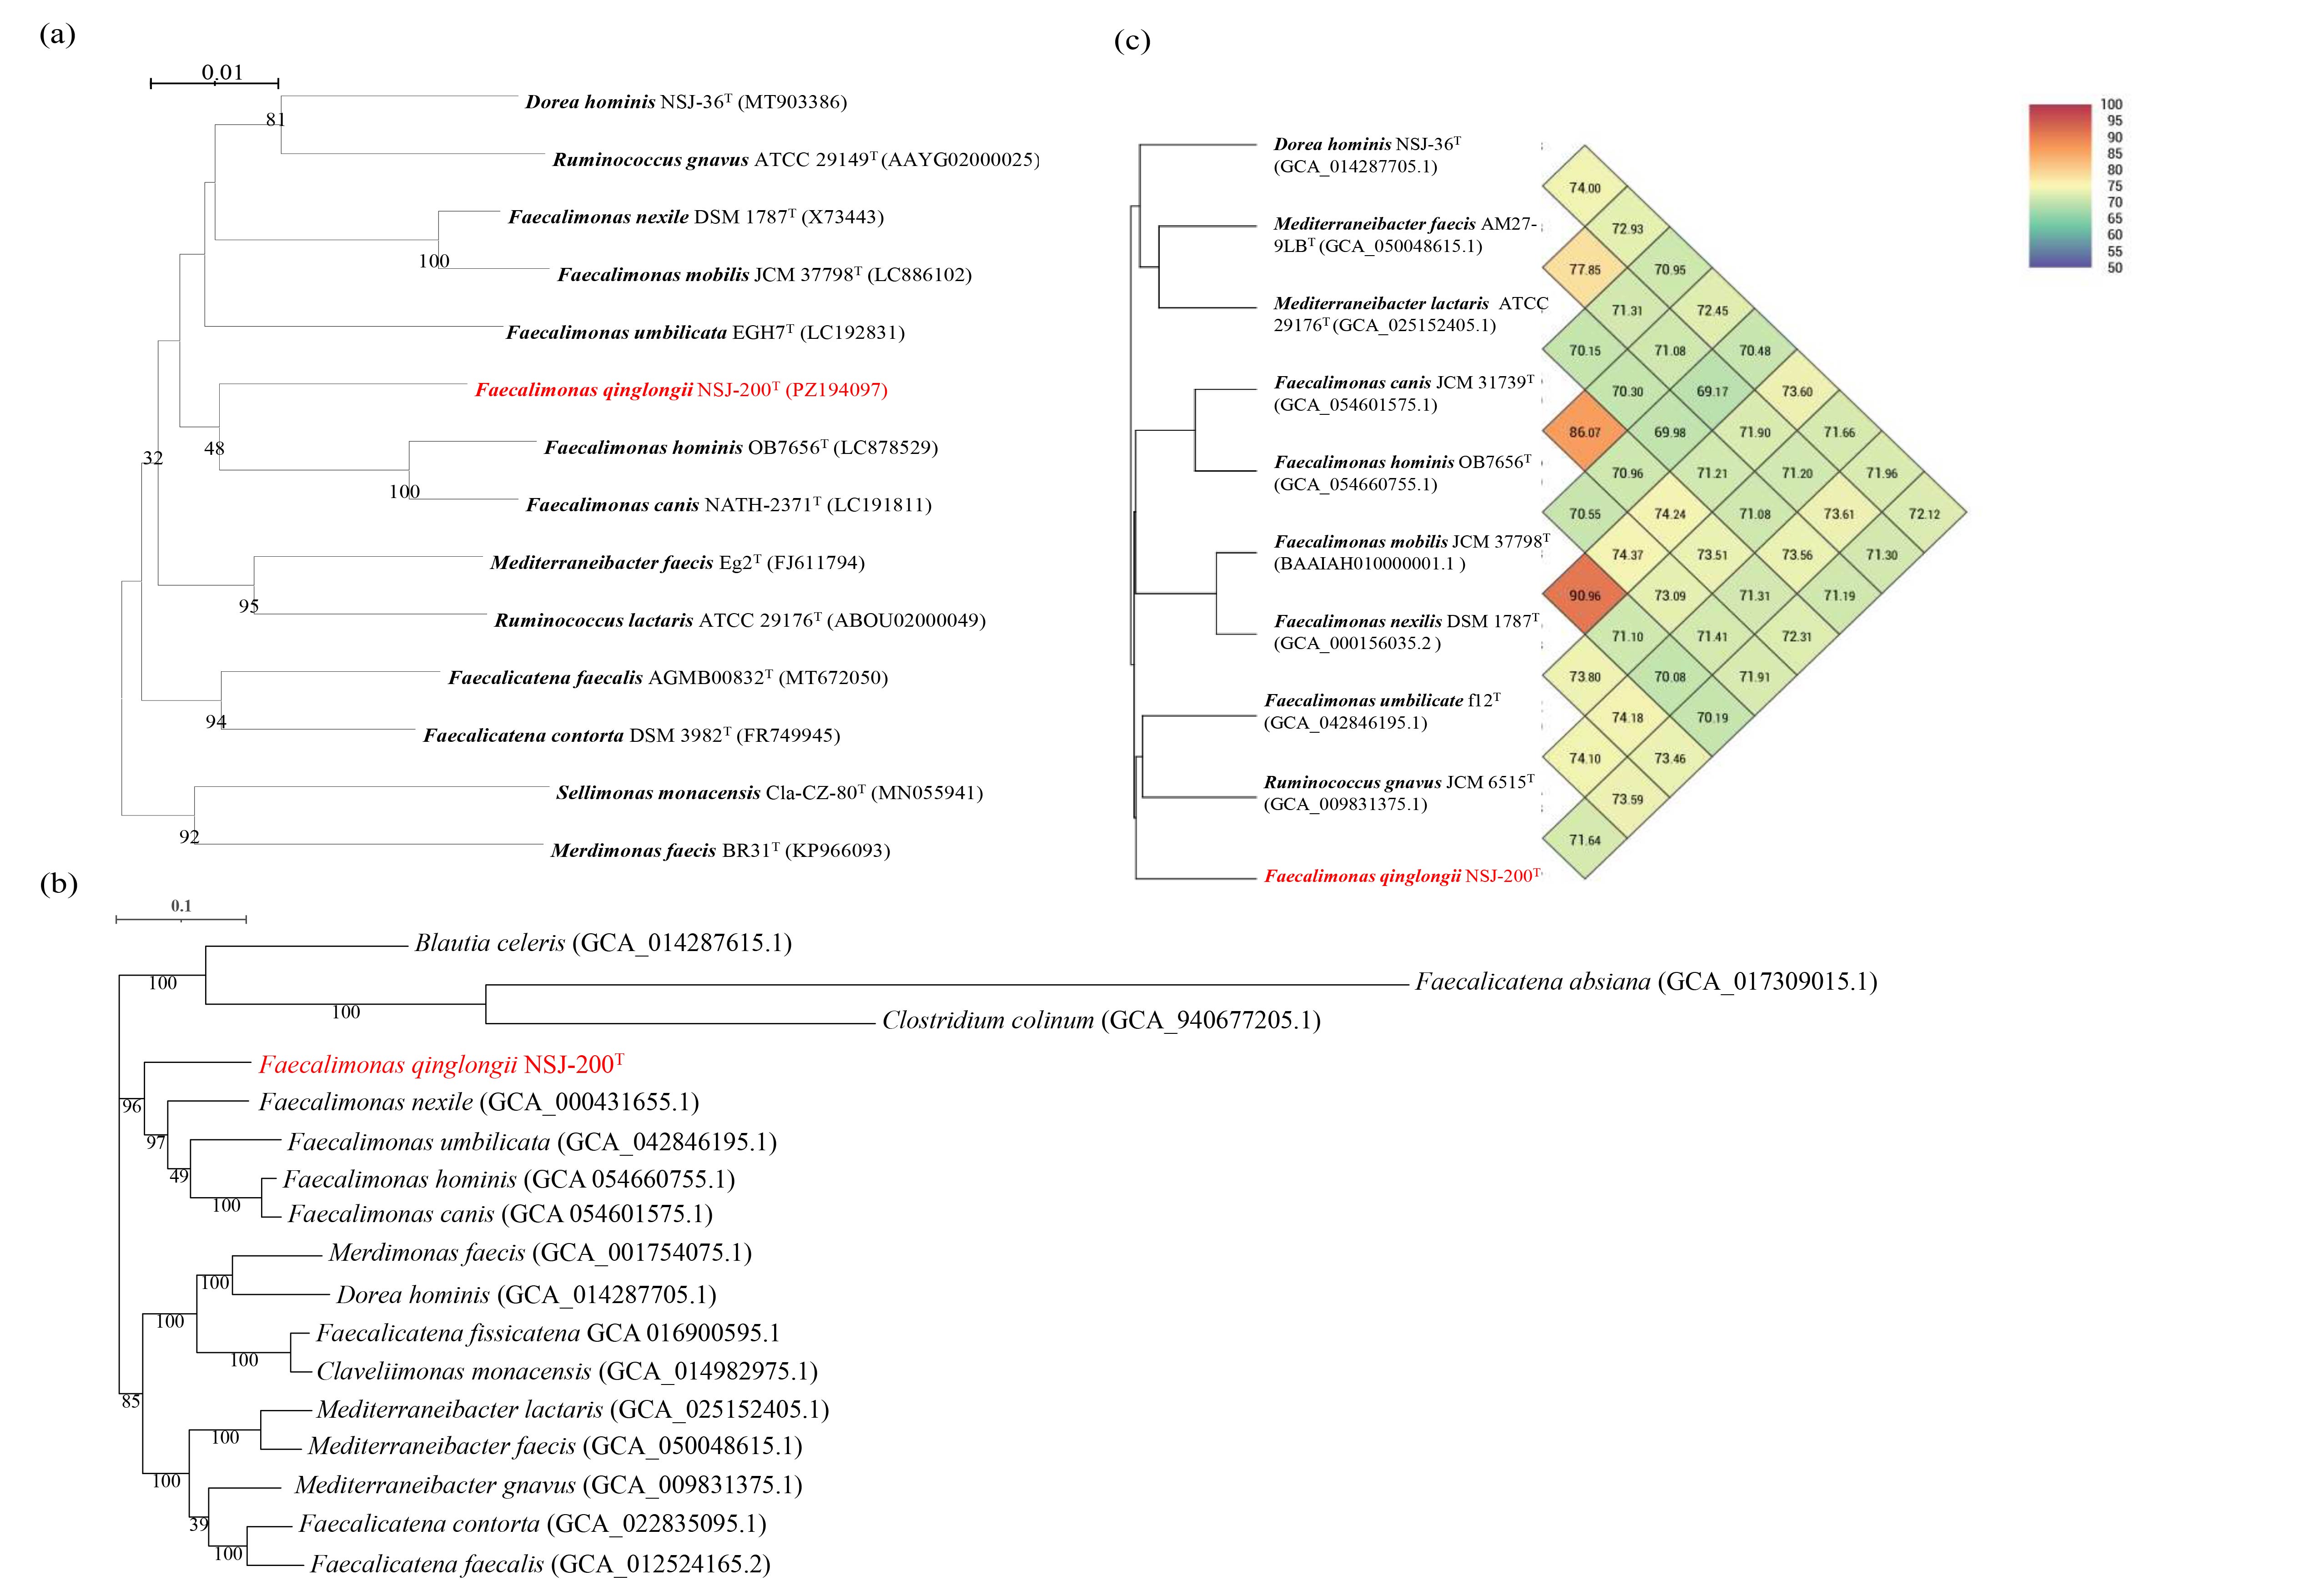


Figure SD-3 (a) The Neighbour-joining phylogenetic tree based on 16S rRNA gene sequences of strain NSJ-200T. GenBank accession numbers are given in parentheses. Percentages of bootstrap support are shown at branch nodes. Bootstrap value was 1000. Bar: 0.01 substitutions per nucleotide position. The phylogenominc tree based on gemome-sequence-alignment (b) and OrthoANI heatmap (c) of strain NSJ-200T and its neighbor species. Refseq ID of representative genomes are given in parentheses. Percentages of bootstrap support are shown at branch nodes. Bar: 0.1 substitutions per nucleotide position.

***Fusicatenibacter xuanwui* sp. nov.**

**Description of *Fusicatenibacter xuanwui* sp. nov.** (xu.an.wu’i. N.L. gen. masc. n. *xuanwui*, of Xuanwu, referring to Xuanwu, the guardian of the North in Chinese mythology)

Strain NSJ-204T (16S rRNA sequence accession number in NCBI is PZ194101) is phylogenetically closest to *Fusicatenibacter faecihominis*, with 16S rRNA gene identity of 97.79%. Phylogenetic tree shows that strain NSJ-204T clusters with other members of the genus *Fusicatenibacter* (Figure SD-4a), suggesting strain NSJ-204T is a member of the genus *Fusicatenibacter*. According to the phylogenominc tree (Figure SD-4c), the ANIs and dDDH values of genomes between strain NSJ-204T and phylogenomically neighbored genomes were calculated, and the highest ANI and dDDH values are 86.49 and 33.20%, respectively, between the query genome of *Fusicatenibacter faecihominis* CLA-AA-H277T (GCA_020686945.1); and difference in % G+C between genomes of strain NSJ-204T and *Fusicatenibacter faecihominis* CLA-AA-H277T (GCA_020686945.1) is 2.24; OrthoANI heatmap (Figure SD-4d) shows the phylogenomic status of the corresponding neighbor species based on OrthoANI values. Based on these results, we concluded that the strain NSJ-204T represents of new species of the genus *Fusicatenibacter*, and the name *Fusicatenibacter xuanwui* sp. nov. is proposed. The type strain NSJ-204T (=CGMCC 1.58806T) was isolated from the faeces of a healthy adult.


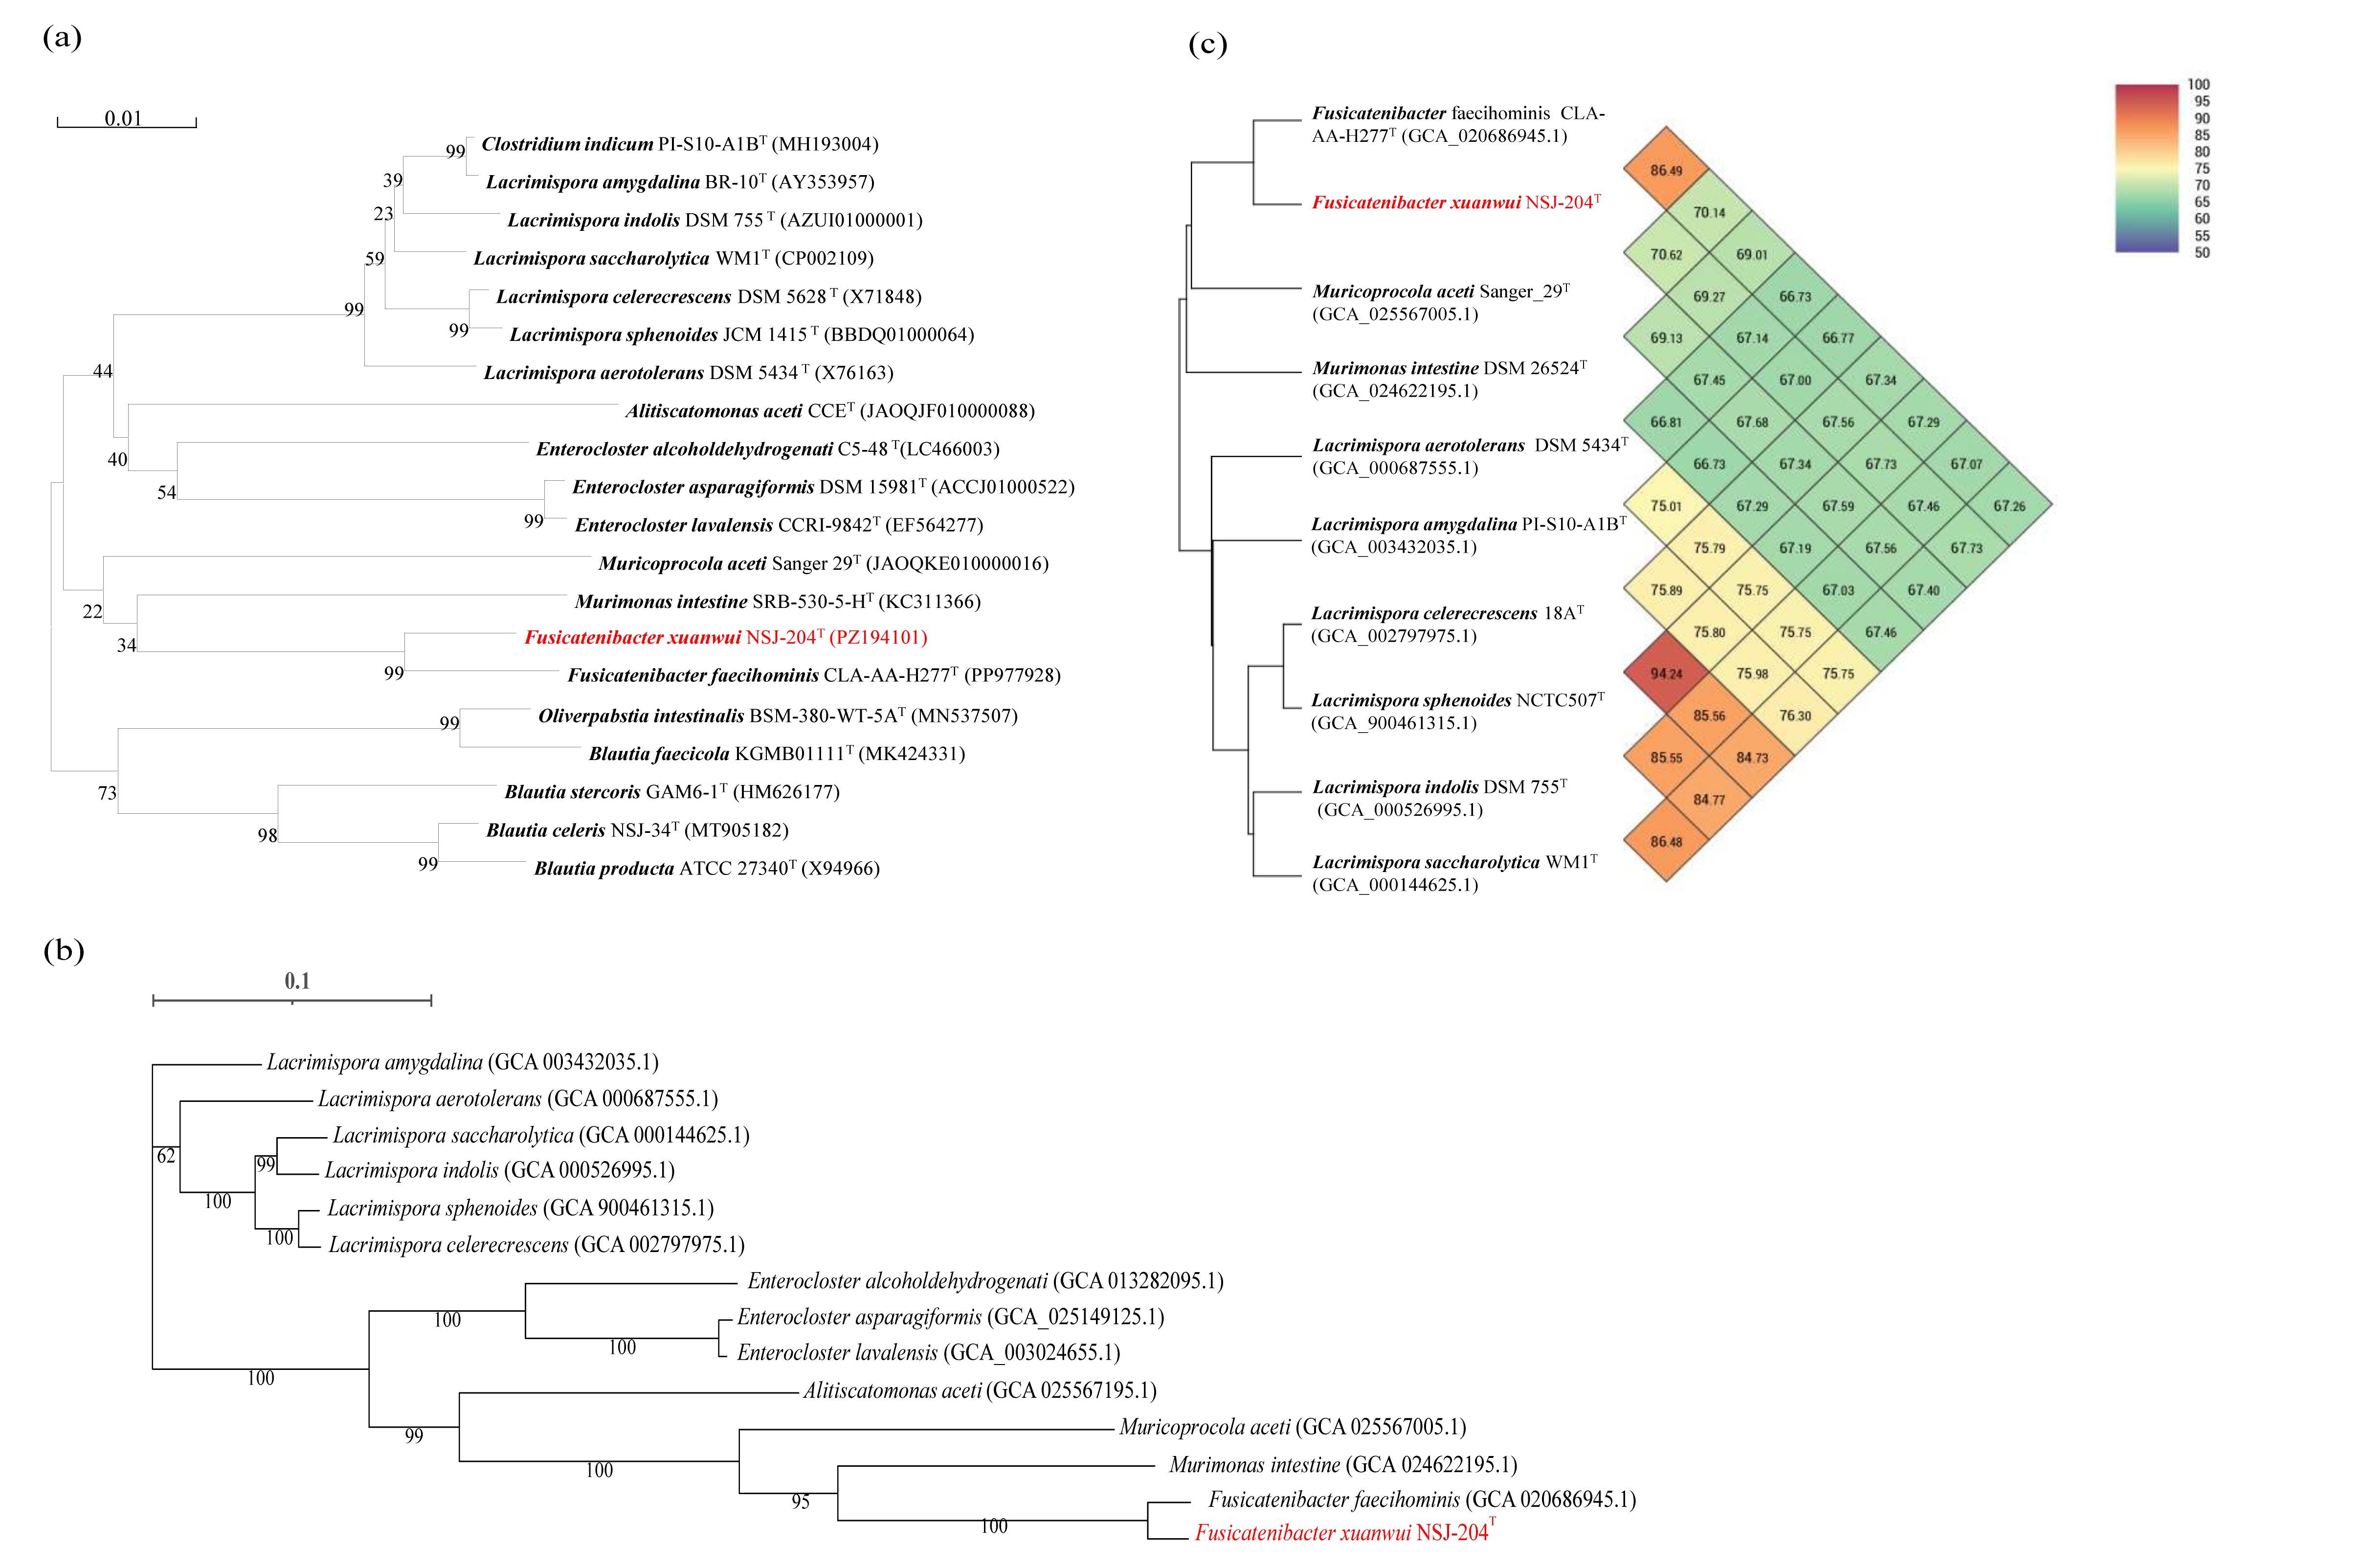


Figure SD-4 (a) The Neighbour-joining phylogenetic tree based on 16S rRNA gene sequences of strain NSJ-204T. GenBank accession numbers are given in parentheses. Percentages of bootstrap support are shown at branch nodes. Bootstrap value was 1000. Bar: 0.01 substitutions per nucleotide position. The phylogenominc tree based on gemome-sequence-alignment (b) and OrthoANI heatmap (c) of strain NSJ-204T and its neighbor species. Refseq ID of representative genomes are given in parentheses. Percentages of bootstrap support are shown at branch nodes. Bar: 0.1 substitutions per nucleotide position.

***Faecalibacterium baihui* sp. nov.**

**Description of *Faecalibacterium baihui*** (bai.hu’i. N.L. gen. masc. n. *baihui*, of Baihu, referring to the White Tiger, the guardian of the West in Chinese mythology)

Strain NSJ-208T (16S rRNA sequence accession number in NCBI is PZ194105) is phylogenetically closest to *Faecalibacterium hattorii*, with 16S rRNA gene identity of 96.69%. Phylogenetic tree shows that strain NSJ-208T clusters with other members of the genus *Faecalibacterium* (Figure SD-5a), suggesting strain NSJ-208T is a member of the genus *Faecalibacterium*. According to the phylogenominc tree (Figure SD-5b), the ANIs and dDDH values of genomes between strain NSJ-208T and phylogenomically neighbored genomes were calculated, and the highest ANI and dDDH values are 79.24 and 24.20%, respectively, between the query genome of *Faecalibacterium hattorii* APC922/41-1T (GCA_003287455.1); and difference in % G+C between genomes of strain NSJ-208T and *Faecalibacterium hattorii* APC922/41-1T (GCA_003287455.1) is 0.10; OrthoANI heatmap (Figure SD-5c) shows the phylogenomic status of the corresponding neighbor species based on OrthoANI values. Based on these results, we concluded that the strain NSJ-208T represents of new species of the genus *Faecalibacterium*, and the name *Faecalibacterium baihui* sp. nov. is proposed. The type strain NSJ-208T (=CGMCC 1.58810T) was isolated from the faeces of a healthy adult.


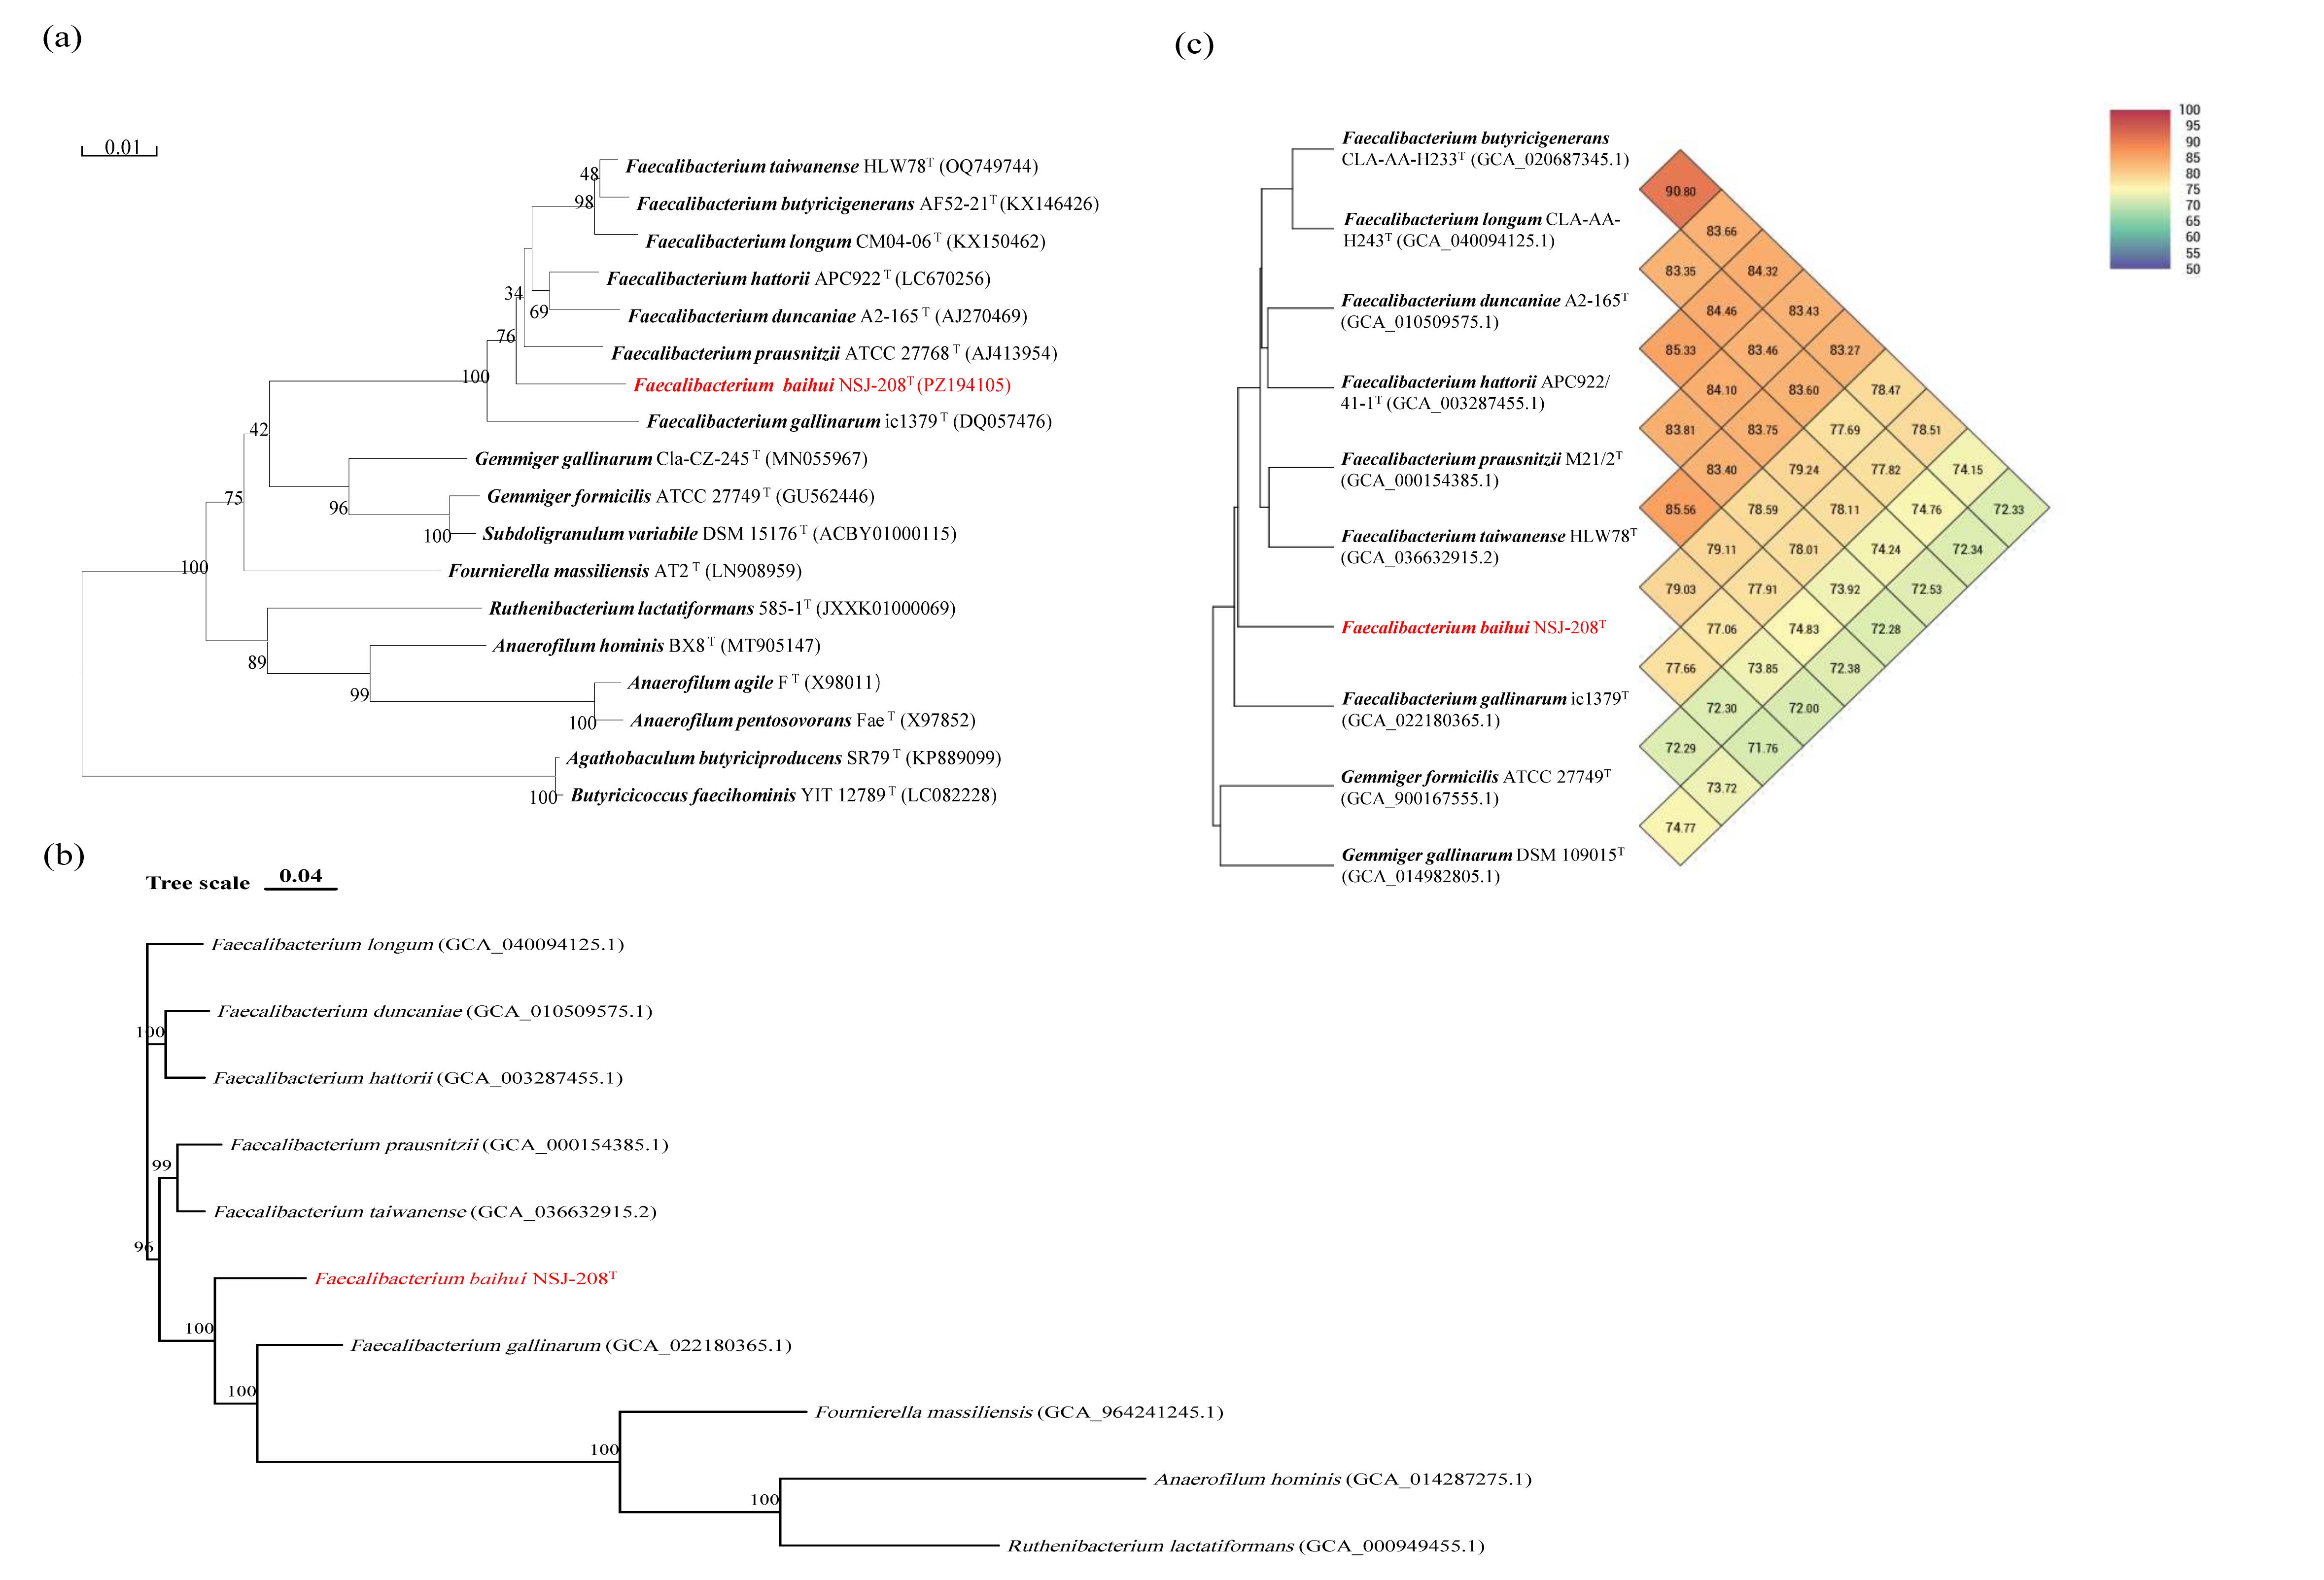


Figure SD-5 (a) The Neighbour-joining phylogenetic tree based on 16S rRNA gene sequences of strain NSJ-208T. GenBank accession numbers are given in parentheses. Percentages of bootstrap support are shown at branch nodes. Bootstrap value was 1000. Bar: 0.01 substitutions per nucleotide position. The phylogenominc tree based on gemome-sequence-alignment (b) and OrthoANI heatmap (c) of strain NSJ-208T and its neighbor species. Refseq ID of representative genomes are given in parentheses. Percentages of bootstrap support are shown at branch nodes. Bar: 0.04 substitutions per nucleotide position.

***Blautia qilinii* sp. nov.**

**Description of *Blautia qilinii* sp. nov.** (qi.lin’i.i. N.L. gen. masc. n. *qilinii*, of Qilin, referring to Qilin, a prominent auspicious beast in Chinese mythology characterized by its benevolence and kindness)

Strain NSJ-202T (16S rRNA sequence accession number in NCBI is PZ194099) is phylogenetically closest to *Blautia obeum*, with 16S rRNA gene identity of 97.83%. Phylogenetic tree shows that strain NSJ-202T clusters with other members of the genus *Blautia* (Figure SD-6a), suggesting strain NSJ-202T is a member of the genus *Blautia*. According to the phylogenominc tree (Figure SD-6b), the ANIs and dDDH values of genomes between strain NSJ-202T and phylogenomically neighbored genomes were calculated, and the highest ANI and dDDH values are 82.65 and 28.40%, respectively, between the query genome of *Blautia obeum* ATCC 29174T (GCA_000153905.1); and difference in % G+C between genomes of strain NSJ-202T and *Blautia obeum* (GCA_000153905.1) is 2.30; OrthoANI heatmap (Figure SD-6c) shows the phylogenomic status of the corresponding neighbor species based on OrthoANI values. Based on these results, we concluded that the strain NSJ-202T represents of new species of the genus *Blautia*, and the name *Blautia qilinii* sp. nov. is proposed. The type strain NSJ-202T (=CGMCC 1.58804T) was isolated from the faeces of a healthy adult.


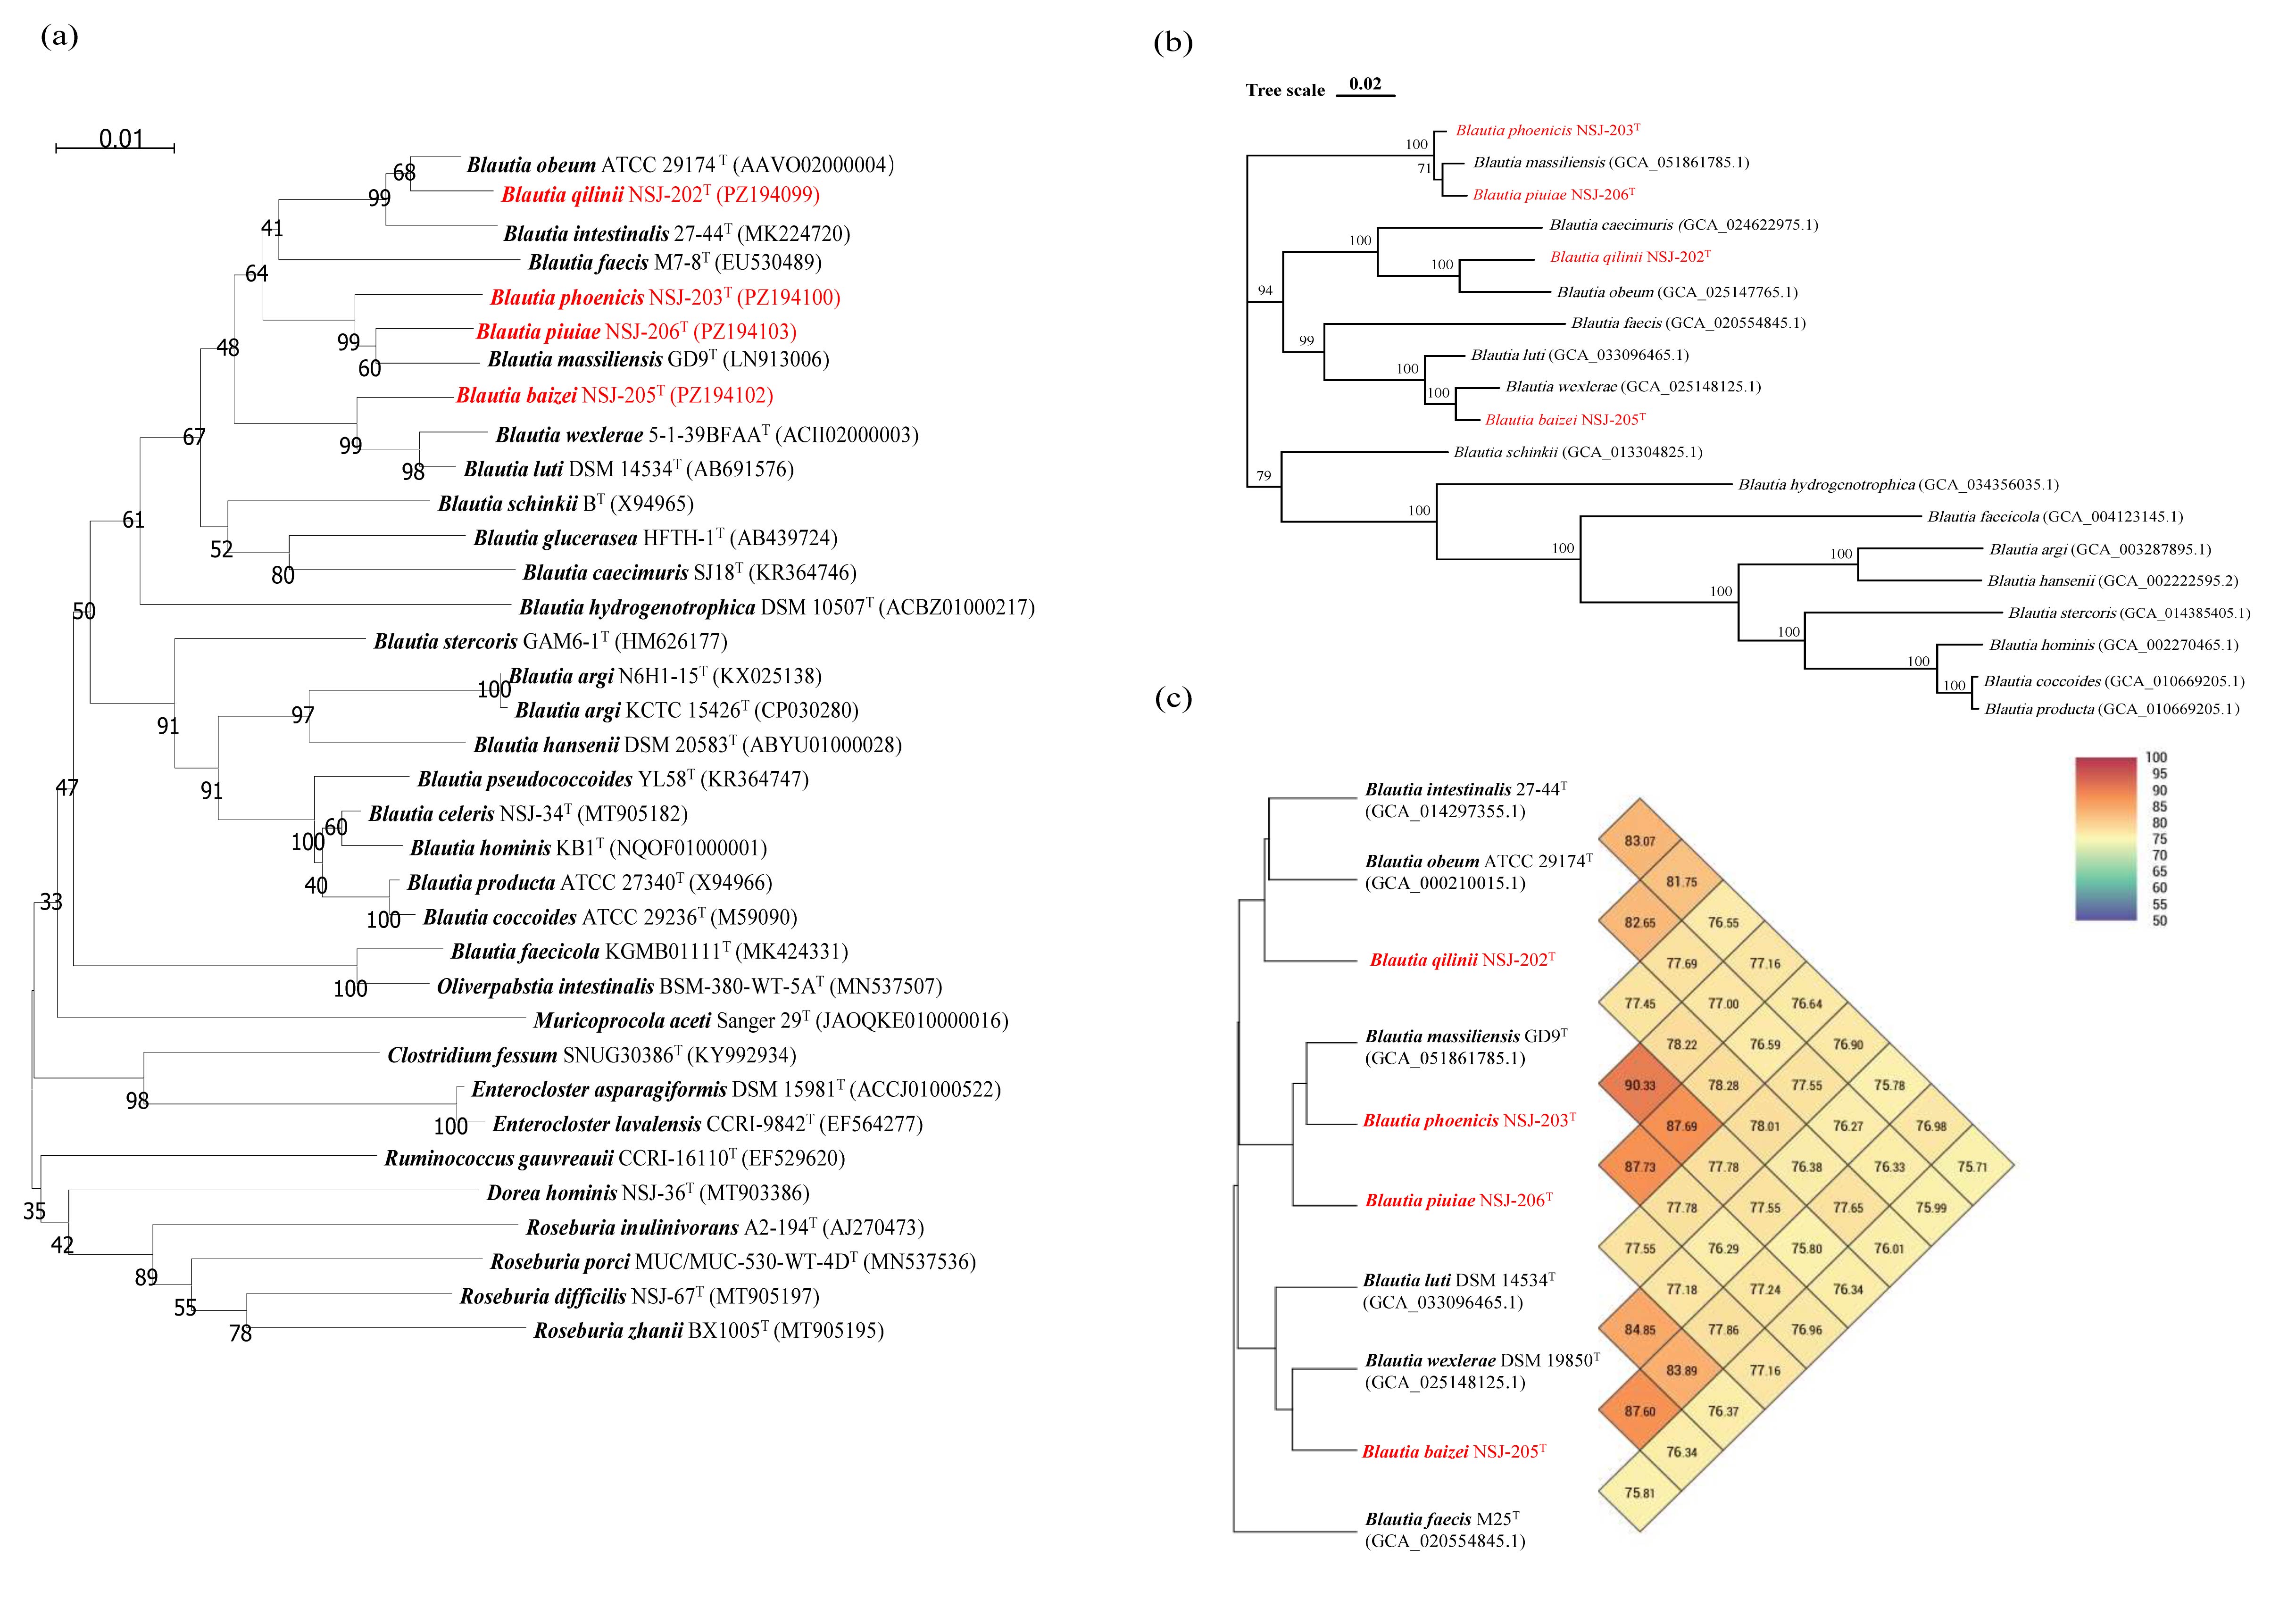


Figure SD-6 (a) The Neighbour-joining phylogenetic tree based on 16S rRNA gene sequences of strain NSJ-202T, NSJ-203T,NSJ-205T and NSJ-206T. GenBank accession numbers are given in parentheses. Percentages of bootstrap support are shown at branch nodes. Bootstrap value was 1000. Bar: 0.01 substitutions per nucleotide position. The phylogenominc tree based on gemome-sequence-alignment (b) and OrthoANI heatmap (c) of strain NSJ-202T, NSJ-203T,NSJ-205T, NSJ-206T and its neighbor species. Refseq ID of representative genomes are given in parentheses. Percentages of bootstrap support are shown at branch nodes. Bar: 0.02 substitutions per nucleotide position.

***Blautia baizei* sp. nov.**

**Description of *Blautia baizei* sp. nov.** (bai.ze’i. N.L. gen. masc. n. *baizei*, of Baize, referring to the Baize, a wise mythical beast in Chinese mythology capable of speaking and knowing the secrets of all creatures)

Strain NSJ-205T (16S rRNA sequence accession number in NCBI is PZ194102) is phylogenetically closest to *Blautia wexlerae*, with 16S rRNA gene identity of 97.93%. Phylogenetic tree shows that strain NSJ-205T clusters with other members of the genus *Blautia* (Figure SD-6a), suggesting strain NSJ-205T is a member of the genus *Blautia*. The genome of strain NSJ-205T was sequenced and the NCBI accession number is JBWLUT000000000. According to the phylogenominc tree (Figure SD-6b), the ANIs and dDDH values of genomes between strain NSJ-205T (NCBI accession number is JBWLUT000000000) and phylogenomically neighbored genomes were calculated, and the highest ANI and dDDH values are 87.60 and 38.50%, respectively, between the query genome of *Blautia wexlerae* DSM 19850T (GCA_000484655.1); and difference in % G+C between genomes of strain NSJ-205T and *Blautia obeum* (GCA_000484655.1) is 0.35; OrthoANI heatmap (Figure SD-6c) shows the phylogenomic status of the corresponding neighbor species based on OrthoANI values. Based on these results, we concluded that the strain NSJ-205T represents of new species of the genus *Blautia*, and the name *Blautia baizei* sp. nov. is proposed. The type strain NSJ-205T (=CGMCC 1.58807T) was isolated from the faeces of a healthy adult.

***Blautia phoenicis* sp. nov.**

**Description of *Blautia phoenicis* sp. nov.** (phoe.ni’cis. L. gen. masc. n. *phoenicis*, of Phoenix, referring to Phoenix, the name of the Chinese mythical bird Phoenix)

Strain NSJ-203T (16S rRNA sequence accession number in NCBI is PZ194100) is phylogenetically closest to *Blautia massiliensis* with 16S rRNA gene identity of 97.52%. Phylogenetic tree shows that strain NSJ-203T clusters with other members of the genus *Blautia* (Figure SD-6a), suggesting strain NSJ-203T is a member of the genus *Blautia*. The genome of strain NSJ-203T was sequenced and the NCBI accession number is JBWJVO000000000. According to the phylogenominc tree (Figure SD-6b), the ANIs and dDDH values of genomes between strain NSJ-203T (NCBI accession number is JBWJVO000000000) and phylogenomically neighbored genomes were calculated, and the highest ANI and dDDH values are 90.33 and 41.30%, respectively, between the query genome of *Blautia massiliensis* GD9T (GCA_001487165.1); and difference in % G+C between genomes of strain NSJ-203T and *Blautia massiliensis* (GCA_001487165.1) is 0.02; OrthoANI heatmap (Figure SD-6c) shows the phylogenomic status of the corresponding neighbor species based on OrthoANI values. Based on these results, we concluded that the strain NSJ-203T represents of new species of the genus *Blautia*, and the name *Blautia phoenicis* sp. nov. is proposed. The type strain NSJ-203T (=CGMCC 1.58805T) was isolated from the faeces of a healthy adult.

***Blautia pixuiae sp. nov.***

**Description of *Blautia pixuiae* sp. nov.** (pi.xu.i’ae. N.L. gen. masc. n. *pixuiae*, of Pixiu, referring to Pixiu, a mythical auspicious creature in Chinese mythology, believed to bring wealth and good fortune)

Strain NSJ-206T (16S rRNA sequence accession number in NCBI is PZ194103) is phylogenetically closest to *Blautia massiliensis* with 16S rRNA gene identity of 97.52%. Phylogenetic tree shows that strain NSJ-206T clusters with other members of the genus *Blautia* (Figure SD-6a), suggesting strain NSJ-206T is a member of the genus *Blautia*. The genome of strain NSJ-206T was sequenced and the NCBI accession number is JBWJVN000000000. According to the phylogenominc tree (Figure SD-6b), the ANIs and dDDH values of genomes between strain NSJ-206T (NCBI accession number is JBWJVN000000000) and phylogenomically neighbored genomes were calculated, and the highest ANI and dDDH values are 87.69 and 36.00%, respectively, between the query genome of *Blautia massiliensis* GD9T (GCA_001487165.1); and difference in % G+C between genomes of strain NSJ-206T and *Blautia massiliensis* GD9T (GCA_001487165.1) is 0.43; OrthoANI heatmap (Figure SD-6c) shows the phylogenomic status of the corresponding neighbor species based on OrthoANI values.Based on these results, we concluded that the strain NSJ-206T represents of new species of the genus *Blautia*, and the name *Blautia pixiui* sp. nov. is proposed. The type strain NSJ-206T (=CGMCC 1.58808T) was isolated from the faeces of a healthy adult.
