# Supplementary material
Source: Research Square preprint supplement (doi:10.21203/rs.3.rs-9805857/v1)
Supplement: Supplementary file 3 [file 53a388256e7aa8a4b9509499.xlsx]

## Sheet: TEST1_Random
Table S5 The clonies of three picking strategies in three tests—TEST1_Random
ID	Closest species
D7	[Clostridium] innocuum
H9	[Clostridium] innocuum
A11	Bacteroides kribbi
A7	Bacteroides kribbi
B7	Bacteroides kribbi
C6	Bacteroides kribbi
C8	Bacteroides kribbi
D12	Bacteroides kribbi
E6	Bacteroides kribbi
E8	Bacteroides kribbi
F6	Bacteroides kribbi
F7	Bacteroides kribbi
G11	Bacteroides kribbi
H6	Bacteroides kribbi
H10	Bacteroides uniformis
H12	Bacteroides uniformis
A10	Longicatena caecimuris
A8	Longicatena caecimuris
B11	Longicatena caecimuris
B12	Longicatena caecimuris
B6	Longicatena caecimuris
B8	Longicatena caecimuris
D10	Longicatena caecimuris
D11	Longicatena caecimuris
D6	Longicatena caecimuris
D9	Longicatena caecimuris
E12	Longicatena caecimuris
F12	Longicatena caecimuris
G7	Longicatena caecimuris
G9	Longicatena caecimuris
G12	Parabacteroides distasonis
H7	Parabacteroides distasonis
A9	Paraclostridium dentum
E10	Paraclostridium dentum
E11	Paraclostridium dentum

## Sheet: TEST1_Manual
Table S5 The clonies of three picking strategies in three tests—TEST1_Manual
ID	Closest species
C1	[Clostridium] innocuum
E4	[Clostridium] innocuum
G5	[Clostridium] innocuum
A4	Bacteroides kribbi
B1	Bacteroides kribbi
D2	Bacteroides kribbi
D3	Bacteroides kribbi
G3	Bacteroides kribbi
H3	Bacteroides kribbi
A3	Bacteroides uniformis
A5	Bacteroides uniformis
D4	Bacteroides uniformis
E2	Bacteroides uniformis
A1	Clostridium sporogenes
A2	Faecalicatena contorta
E5	Faecalicoccus pleomorphus
B2	Lacticaseibacillus rhamnosus
D5	Lacticaseibacillus rhamnosus
C4	Lactococcus lactis
D1	Lactococcus lactis
F1	Lactococcus lactis
H5	Lactococcus lactis
B3	Ligilactobacillus salivarius
B4	Longicatena caecimuris
B5	Longicatena caecimuris
C2	Longicatena caecimuris
C3	Longicatena caecimuris
F2	Longicatena caecimuris
F3	Longicatena caecimuris
F4	Longicatena caecimuris
F5	Longicatena caecimuris
G4	Longicatena caecimuris
H1	Longicatena caecimuris
H2	Longicatena caecimuris
C5	Parabacteroides distasonis
H4	Parabacteroides distasonis
E1	Streptococcus anginosus
G1	Streptococcus anginosus
G2	Streptococcus anginosus

## Sheet: TEST1_RAcolony
Table S5 The clonies of three picking strategies in three tests—TEST1_RAcolony
ID	Closest species
B9	[Clostridium] innocuum
D6	[Clostridium] innocuum
D12	Bacteroides kribbi
A8	Bacteroides uniformis
G11	Bacteroides uniformis
G7	Bifidobacterium adolescentis
D10	Clostridium sporogenes
A12	Faecalicatena contorta
E10	Lacticaseibacillus rhamnosus
H12	Lacticaseibacillus rhamnosus
H7	Lacticaseibacillus rhamnosus
A11	Lactococcus lactis
D11	Lactococcus lactis
D7	Lactococcus lactis
E12	Lactococcus lactis
H6	Lactococcus lactis
A10	Longicatena caecimuris
B7	Longicatena caecimuris
C9	Longicatena caecimuris
F6	Longicatena caecimuris
C6	Mediterraneibacter gnavus
A9	Parabacteroides distasonis
F12	Parabacteroides distasonis
G12	Parabacteroides distasonis
G9	Parabacteroides distasonis
H10	Parabacteroides distasonis
E11	Paraclostridium dentum
E9	Paraclostridium dentum
B6	Streptococcus anginosus
D9	Streptococcus anginosus
E6	Streptococcus anginosus
F7	Streptococcus anginosus
B11	Streptococcus parasanguinis
B12	Streptococcus parasanguinis
H9	Streptococcus parasanguinis

## Sheet: TEST2_Random
Table S5 The clonies of three picking strategies in three tests—TEST2_Random
ID	Closest species
A1	Longicatena caecimuris
A2	Longicatena caecimuris
A3	Bacteroides kribbi
A4	Bacteroides kribbi
A5	Bacteroides kribbi
A6	Longicatena caecimuris
A8	Longicatena caecimuris
B1	Paraclostridium dentum
B2	Paraclostridium dentum
B4	Bacteroides uniformis
B5	Paraclostridium dentum
B6	Bacteroides kribbi
B7	Longicatena caecimuris
B8	[Clostridium] innocuum
C1	Longicatena caecimuris
C2	Bacteroides kribbi
C3	Longicatena caecimuris
C4	Bacteroides kribbi
C6	Bacteroides kribbi
C7	Bacteroides kribbi
C8	Bacteroides kribbi
D2	Longicatena caecimuris
D3	Longicatena caecimuris
D4	Longicatena caecimuris
D5	Longicatena caecimuris
D6	Bacteroides uniformis
D7	Paraclostridium dentum
D8	Bacteroides kribbi
E2	Longicatena caecimuris
E3	Longicatena caecimuris
E4	Bacteroides kribbi
E5	Bacteroides kribbi
E6	Longicatena caecimuris
E7	Longicatena caecimuris
E8	[Clostridium] innocuum

## Sheet: TEST2_Manual
Table S5 The clonies of three picking strategies in three tests—TEST2_Manual
ID	Closest species
A1	Paraclostridium dentum
A2	Lactococcus lactis
A3	Lactococcus lactis
A4	Bifidobacterium adolescentis
A5	Lactococcus lactis
B3	[Clostridium] innocuum
B4	[Clostridium] innocuum
B5	Lacticaseibacillus rhamnosus
C1	Streptococcus anginosus
C2	Paraclostridium dentum
C3	Bacteroides uniformis
C5	Streptococcus anginosus
D1	Parabacteroides distasonis
D3	Streptococcus anginosus
D4	Parabacteroides distasonis
E2	Lacticaseibacillus rhamnosus
E3	Lacticaseibacillus rhamnosus
E4	Faecalicoccus pleomorphus
E5	Lacticaseibacillus rhamnosus
F1	Parabacteroides distasonis
F3	Longicatena caecimuris
F4	Longicatena caecimuris
G1	Lactococcus lactis
G2	Bacteroides uniformis
G4	[Clostridium] innocuum
G5	Streptococcus anginosus
H1	Lactococcus lactis
H2	Longicatena caecimuris
H3	Lactococcus lactis
H4	Longicatena caecimuris
H5	Lactococcus lactis

## Sheet: TEST2_RAcolony
Table S5 The clonies of three picking strategies in three tests—TEST2_RAcolony
ID	Closest species
B8	[Clostridium] innocuum
D9	[Clostridium] innocuum
G10	[Clostridium] innocuum
G7	Bacteroides uniformis
H11	Bifidobacterium adolescentis
E8	Clostridium sporogenes
H7	Clostridium sporogenes
F11	Faecalicoccus pleomorphus
C7	Lacticaseibacillus rhamnosus
A11	Lactococcus lactis
F7	Lactococcus lactis
A10	Longicatena caecimuris
A12	Longicatena caecimuris
A9	Longicatena caecimuris
C8	Longicatena caecimuris
C9	Longicatena caecimuris
D8	Longicatena caecimuris
F10	Longicatena caecimuris
G11	Longicatena caecimuris
E7	Parabacteroides distasonis
E10	Paraclostridium dentum
B11	Paraclostridium dentum
C10	Streptococcus anginosus
D7	Streptococcus anginosus
D11	Bacteroides kribbi
F12	Streptococcus parasanguinis

## Sheet: TEST3_Random
Table S5 The clonies of three picking strategies in three tests—TEST3_Random
ID	Closest species
A1	Longicatena caecimuris
A2	Paraclostridium dentum
A3	Longicatena caecimuris
A4	Paraclostridium dentum
A5	Bacteroides kribbi
A6	Paraclostridium dentum
A7	Bacteroides kribbi
A8	Paraclostridium dentum
B1	Paraclostridium dentum
B2	Parabacteroides distasonis
B3	Longicatena caecimuris
B4	Longicatena caecimuris
B5	Longicatena caecimuris
B6	Streptococcus ilei
B7	Paraclostridium dentum
B8	Paraclostridium dentum
C1	Bacteroides kribbi
C2	Bacteroides kribbi
C3	Paraclostridium dentum
C4	Longicatena caecimuris
C5	Paraclostridium dentum
C6	Longicatena caecimuris
C7	Longicatena caecimuris
C8	Streptococcus ilei
D1	Streptococcus ilei
D2	Paraclostridium dentum
D3	Longicatena caecimuris
D4	Bacteroides kribbi
D5	Longicatena caecimuris
D6	Paraclostridium dentum
D7	Longicatena caecimuris
D8	Longicatena caecimuris

## Sheet: TEST3_Manual
Table S5 The clonies of three picking strategies in three tests—TEST3_Manual
ID	Closest species
C11	[Clostridium] innocuum
C6	[Clostridium] innocuum
C8	[Clostridium] innocuum
C9	[Clostridium] innocuum
D10	[Clostridium] innocuum
D8	[Clostridium] innocuum
D11	Clostridium sporogenes
E11	Clostridium sporogenes
H6	Clostridium sporogenes
A12	Lactococcus lactis
C12	Lactococcus lactis
D9	Lactococcus lactis
E12	Lactococcus lactis
F12	Lactococcus lactis
F9	Lactococcus lactis
G11	Lactococcus lactis
G12	Lactococcus lactis
G8	Lactococcus lactis
A7	Longicatena caecimuris
E8	Longicatena caecimuris
F8	Longicatena caecimuris
H11	Longicatena caecimuris
F7	Parabacteroides distasonis
C10	Paraclostridium dentum
E10	Paraclostridium dentum
G10	Paraclostridium dentum
G6	Paraclostridium dentum
B6	Streptococcus anginosus
F6	Streptococcus anginosus
A8	Streptococcus parasanguinis
E6	Streptococcus parasanguinis
E9	Streptococcus parasanguinis

## Sheet: TEST3_RAcolony
Table S5 The clonies of three picking strategies in three tests—TEST3_RAcolony
ID	Closest species
B1	[Clostridium] innocuum
F1	Bacteroides kribbi
A3	Clostridium sporogenes
C1	Eubacterium ventriosum
E2	Faecalicatena contorta
E4	Lacticaseibacillus rhamnosus
E1	Lactococcus lactis
H4	Lactococcus lactis
B5	Longicatena caecimuris
D1	Longicatena caecimuris
F3	Longicatena caecimuris
G2	Longicatena caecimuris
G3	Longicatena caecimuris
C4	Mediterraneibacter gnavus
F4	Parabacteroides distasonis
F5	Parabacteroides distasonis
G5	Parabacteroides distasonis
A1	Paraclostridium dentum
A2	Paraclostridium dentum
H1	Paraclostridium dentum
B2	Streptococcus anginosus
C2	Streptococcus anginosus
H3	Streptococcus anginosus
H5	Streptococcus anginosus
D3	Streptococcus parasanguinis
H2	Streptococcus parasanguinis
