# Supplementary material
Source: Research Square preprint supplement (doi:10.21203/rs.3.rs-9805857/v1)
Supplement: Supplementary file 4 [file 76459af158436c69c1f945ba.xlsx]

## Sheet: Sheet1
Table S7 Comparison of overall redundancy rate between RAcolony and conventional manual methods
Biobanks	Colonies	Species	Overall redundant rate (%)
RAcolony	901	167	440
hGMB	18560	400	4540
CGR	6487	338	1819
HBC	13490	273	4841
CAMII	26997	394	6752
BIO_ML	7758	159	4779
Microbial culturomics	32500	340	9459
