# Supplementary material
Source: Research Square preprint supplement (doi:10.21203/rs.3.rs-9805857/v1)
Supplement: Supplementary file 5 [file 92cb945841a5dc8ff39b3595.xlsx]

## Sheet: Sheet1
Table S3 The media and culture conditions used fo gut microbe isolation
Culture conditions	Base medium	Supplements	Incubation temprature	Incubation Gaseous environment
1	modified mGAM Medium	Trehalose 0.5 g, Mannose 0.5 g, Cellobiose 0.5 g, Palatinose 0.5 g, Inulin 0.5 g, Galactose 0.5 g, Rhamnose 0.5 g, Fructose 0.5 g, Arginine 0.5 g, Cysteine 0.5 g, Tryptophan 0.3 g, NaH2CO3 2g, CH3COONa 2.46 g, Clarified Rumen Fluid 5%, hemin 0.01g, Wolfe's Mineral solution(0.1%), Wolfe's Vitamin solution(0.1%), vitamin K1 5 ml(0.1%)	37°C	Anaerobic
2	YCFA		37°C	Anaerobic
3	Schaedler Agar	Clarified Rumen Fluid 5%, hemin 0.01g, Wolfe's Mineral solution(0.1%), Wolfe's Vitamin solution(0.1%), vitamin K1 5 ml(0.1%)	37°C	Anaerobic
4	MS Medium	Casein peptone 5 g, Yeast extract 1.25 g, Amino acids Supplement (WEIDI, China) 1.5 g, L-Arginine 0.075 g, L-Cysteine 1 g, KH2PO4 0.45 g, K2HPO4 0.45 g, NaCl 0.9 g, NaHCO3 4 g, MgSO4 0.044g, CaCl2 0.09 g, D-Glucose 2 g, D-Galactose 0.5 g, D-Fructose 0.5 g, Trehalose 0.5 g, D-Mannose 0.5 g, Cellobiose 0.5 g, Inulin 0.5 g, Palatinose 0.5 g, L-Rhamnose 0.5 g, Hemin solution 5 ml, Clarified rumen flu…	37°C	Anaerobic
