# Supplementary material
Source: Research Square preprint supplement (doi:10.21203/rs.3.rs-9805857/v1)
Supplement: Supplementary file 6 [file b085830d50efee8ed550e202.xlsx]

## Sheet: information of 20 gut strains
Table S2 Detailed information of gut microbial strains for validating the concept of RAcolony
hGMB ID	Taxonomy
HA0600	Faecalicatena contorta
HA1013	Christensenella minuta
HA1241	Bacteroides uniformis
HA2082	Shigella flexneri
HA2385	Enterocloster bolteae
HA2505	Ligilactobacillus salivarius
HA2564	Lactococcus lactis
HA2814	Clostridium paraputrificum
HA3044	Paraclostridium benzoelyticum
HA3092	Enterococcus faecalis
HA3895	Klebsiella pneumoniae
HA4376	Luoshenia tenuis
HA4476	Bacteroides fragilis
HA4683	Faecalibacterium prausnitzii
HA4694	Ruminococcus gnavus
HA5349	Faecalicoccus pleomorphus
HA6410	Blautia argi
HA7163	Clostridium innocuum
HA7166	Streptococcus constellatus
HA7171	Streptococcus parasanguinis

## Sheet: Artificial microbial community 
Table S2 Detailed strains information of defined microbial community
hGMB ID	Taxonomy
HA0600	Faecalicatena contorta
HA1169	Bifidobacterium faecale
HA1241	Bacteroides uniformis
HA2505	Ligilactobacillus salivarius
HA2564	Lactococcus lactis
HA4694	Ruminococcus gnavus
HA5349	Faecalicoccus pleomorphus
HA7163	[Clostridium] innocuum
HA7171	Streptococcus parasanguinis
HA8163	Anaerostipes caccae
HA8167	Lacticaseibacillus rhamnosus
HA8395	Longicatena caecimuris
HA8846	Turicibacter sanguinis
HA8863	Streptococcus anginosus
HA8999	Paraclostridium dentum
HA9132	Mediterraneibacter gnavus
HA9196	Eubacterium ventriosum
HA9541	Bacteroides kribbi
