# Supplementary material
Source: Research Square preprint supplement (doi:10.21203/rs.3.rs-9805857/v1)
Supplement: Supplementary file 8 [file df19a63d40b427753b60c69c.xlsx]

## Sheet: Sheet1
Table S1 22 image features of clonies
Interface fields	Image feature	Description
circularity	Circularity	Circularity is an indicator used to describe how closely the contour of an object approximates a perfect circle. It helps determine whether the shape of an object is close to circular.
area	Area	Area refers to the pixel area occupied by a colony, reflecting the size and growth status of the colony.
WHRate	Aspect Ratio of Contour	The aspect ratio of the contour (ratio of major to minor axis lengths) complements circularity in shape description. Under identical circularity values, it distinguishes between circular and elliptical contours.
first_derivative_avg	First-Order Differential Mean of Contour	The first-order differential mean measures the degree of variation in contour shape. It provides an average value to characterize the overall complexity of shape changes.
second_derivative_avg	Second-Order Differential Mean of Contour	The second-order differential of the contour quantifies curvature or edge bending. In physics and engineering, it provides information about shape curvature and edge variation rates.
dGrayAvg	Colony Grayscale Mean	A color feature describing the statistical distribution of grayscale values. The grayscale mean represents the average grayscale level of a colony, indirectly reflecting its light transmittance.
dGrayDev	Colony Grayscale Variance	A color feature reflecting the dispersion of grayscale distribution. Higher variance indicates more complex surface textures.
dBlackPixel	Central Thickness Proportion	A color feature quantifying the proportion of the central region in colonies exhibiting thicker centers and thinner edges.
contrast	Texture Contrast	Reflects the contrast between different grayscale levels. Higher contrast indicates more pronounced grayscale differences, representing complex textures.
contrast_1	Texture Contrast (45°)	Same as above, but extracted from texture features in the 45° direction.
dissimilarity	Texture Inverse Difference Matrix	Measures the disparity between grayscale levels. Larger values indicate greater differences in grayscale pixel distributions.
dissimilarity_1	Texture Inverse Difference Matrix (45°)	Same as above, but extracted from texture features in the 45° direction.
homogeneity	Texture Uniformity	Indicates the uniformity of grayscale pixel distributions. Higher values represent more uniform distributions.
homogeneity_1	Texture Uniformity (45°)	Same as above, but extracted from texture features in the 45° direction.
energy	Texture Energy Entropy	Reflects the statistical distribution of grayscale levels. Higher energy entropy indicates more concentrated grayscale distributions.
energy_1	Texture Energy Entropy (45°)	Same as above, but extracted from texture features in the 45° direction.
correlation	Texture Correlation	Describes the correlation between grayscale pixels. Higher values indicate stronger correlations.
correlation_1	Texture Correlation (45°)	Same as above, but extracted from texture features in the 45° direction.
asm_features	Texture Angular Second Moment	Quantifies the depth of grooves in colonies using contrast features from grayscale co-occurrence matrices. Higher values indicate deeper grooves caused by uneven density distribution during growth.
asm_1	Texture Angular Second Moment (45°)	Same as above, but extracted from texture features in the 45° direction.
center_distance	Concentricity of Inner and Outer Contours	Describes irregular colony expansion during growth, leading to non-concentric inner and outer contours. Higher concentricity values indicate more severe irregular expansion.
contour_complexity	Contour Regularity	Defined as the ratio of the difference between the minimum circumscribed circle radius and maximum inscribed circle radius to the minimum circumscribed circle radius. Larger ratios indicate lower edge regularity.
