# Supplementary material
Source: Research Square preprint supplement (doi:10.21203/rs.3.rs-9805857/v1)
Supplement: Supplementary file 9 [file f00ddaddd6a3d0a1dcf19eec.docx]

### Supplementary Figures:

### RAcolony: A Multimodal Platform Integrating Raman Spectroscopy and Automated Imaging for Efficient Construction of Personalized Gut Microbiome Biobanks

Yang Yan†1, He Jiang†1, Jian-Bo Ma5, Min-Zhi Jiang1, Chen Chen1, Zi-Nuo An1, Xin-Yao Li1, Guozhong Chen1, Xiao-Yang Zhu1, Tian-Yu Li3, Yulin Wang1, Chang Liu1, An-Qi Zhao1, Xiao-Jia Han1, Dalei Wu*,1, Bei Li*,3,4, Shuang-Jiang Liu*,1,2

1State Key Laboratory of Microbial Technology, Shandong University, 72 Binhai Road, Jimo, Qingdao 266237, P.R. China

2State Key Laboratory of Microbial Diversity and Innovative Utilization, Institute of Microbiology, Chinese Academy of Sciences, No.1 Beichenxi Road, Chaoyang District, Beijing, P.R. China

3HOOKE Instruments Ltd., Changchun 130033, P.R. China

4State Key Laboratory of Advanced Manufacturing for Optical Systems, Changchun Institute of Optics, Fine Mechanics and Physics, Chinese Academy of Sciences, Changchun 130033, P. R. China

5Haining high-tech research institute, Jiaxing, Zhejiang 314408, P.R. China

*Corresponding authors:

Shuang-Jiang Liu (liusj @sdu.edu.cn)

Address: State Key Laboratory of Microbial technology, Shandong University, 72 Binhai Road, Jimo, Qingdao, P.R. China

Phone number: 0532-58630001

Bei Li (beili@ciomp.ac.cn)

Address: State Key Laboratory of Advanced Manufacturing for Optical Systems, Changchun Institute of Optics, Fine Mechanics and Physics, Chinese Academy of Sciences, Changchun 130033, P. R. China;

Phone number: 0431-81077008

Dalei Wu ([dlwu@sdu.edu.cn](mailto:dlwu@sdu.edu.cn))

Address: State Key Laboratory of Microbial technology, Shandong University, 72 Binhai Road, Jimo, Qingdao, P.R. China

Phone number: 0532-58631508


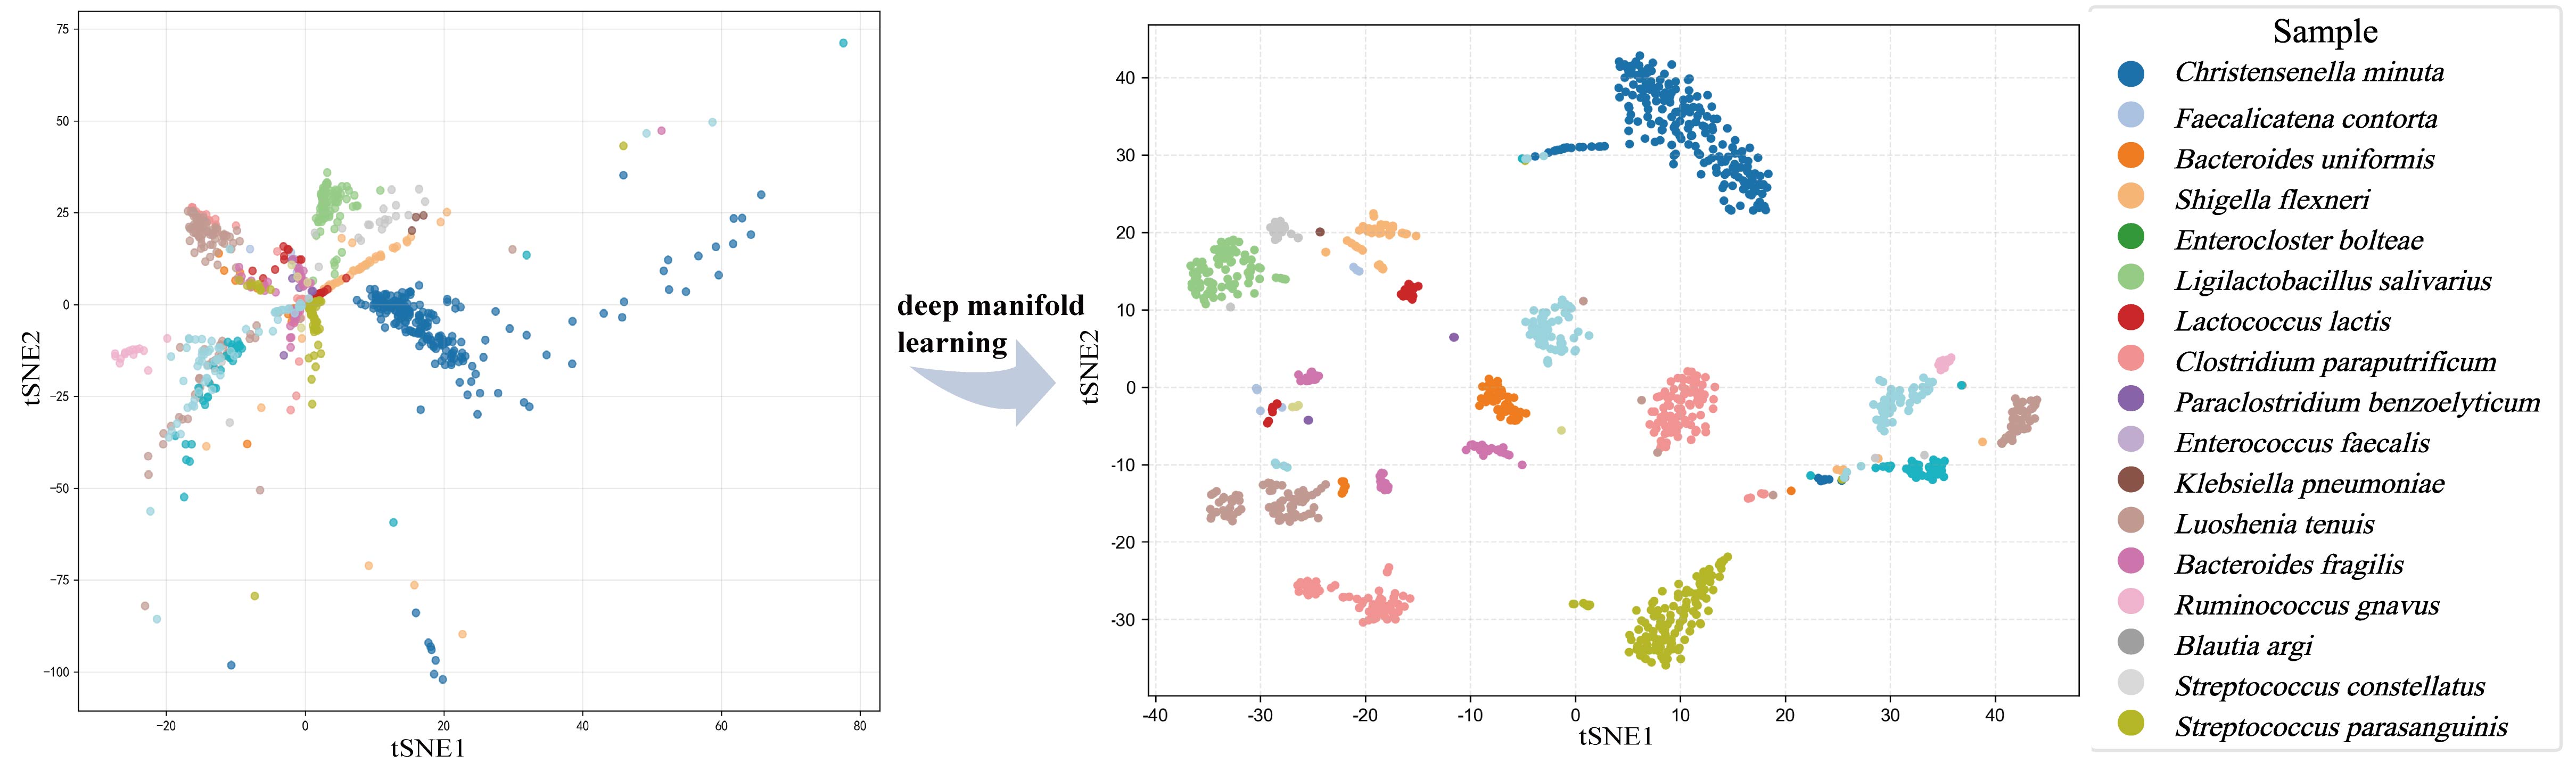


Fig. S1 Comparison of clustering performance of bacterial colony Raman spectra before and after deep manifold learning.


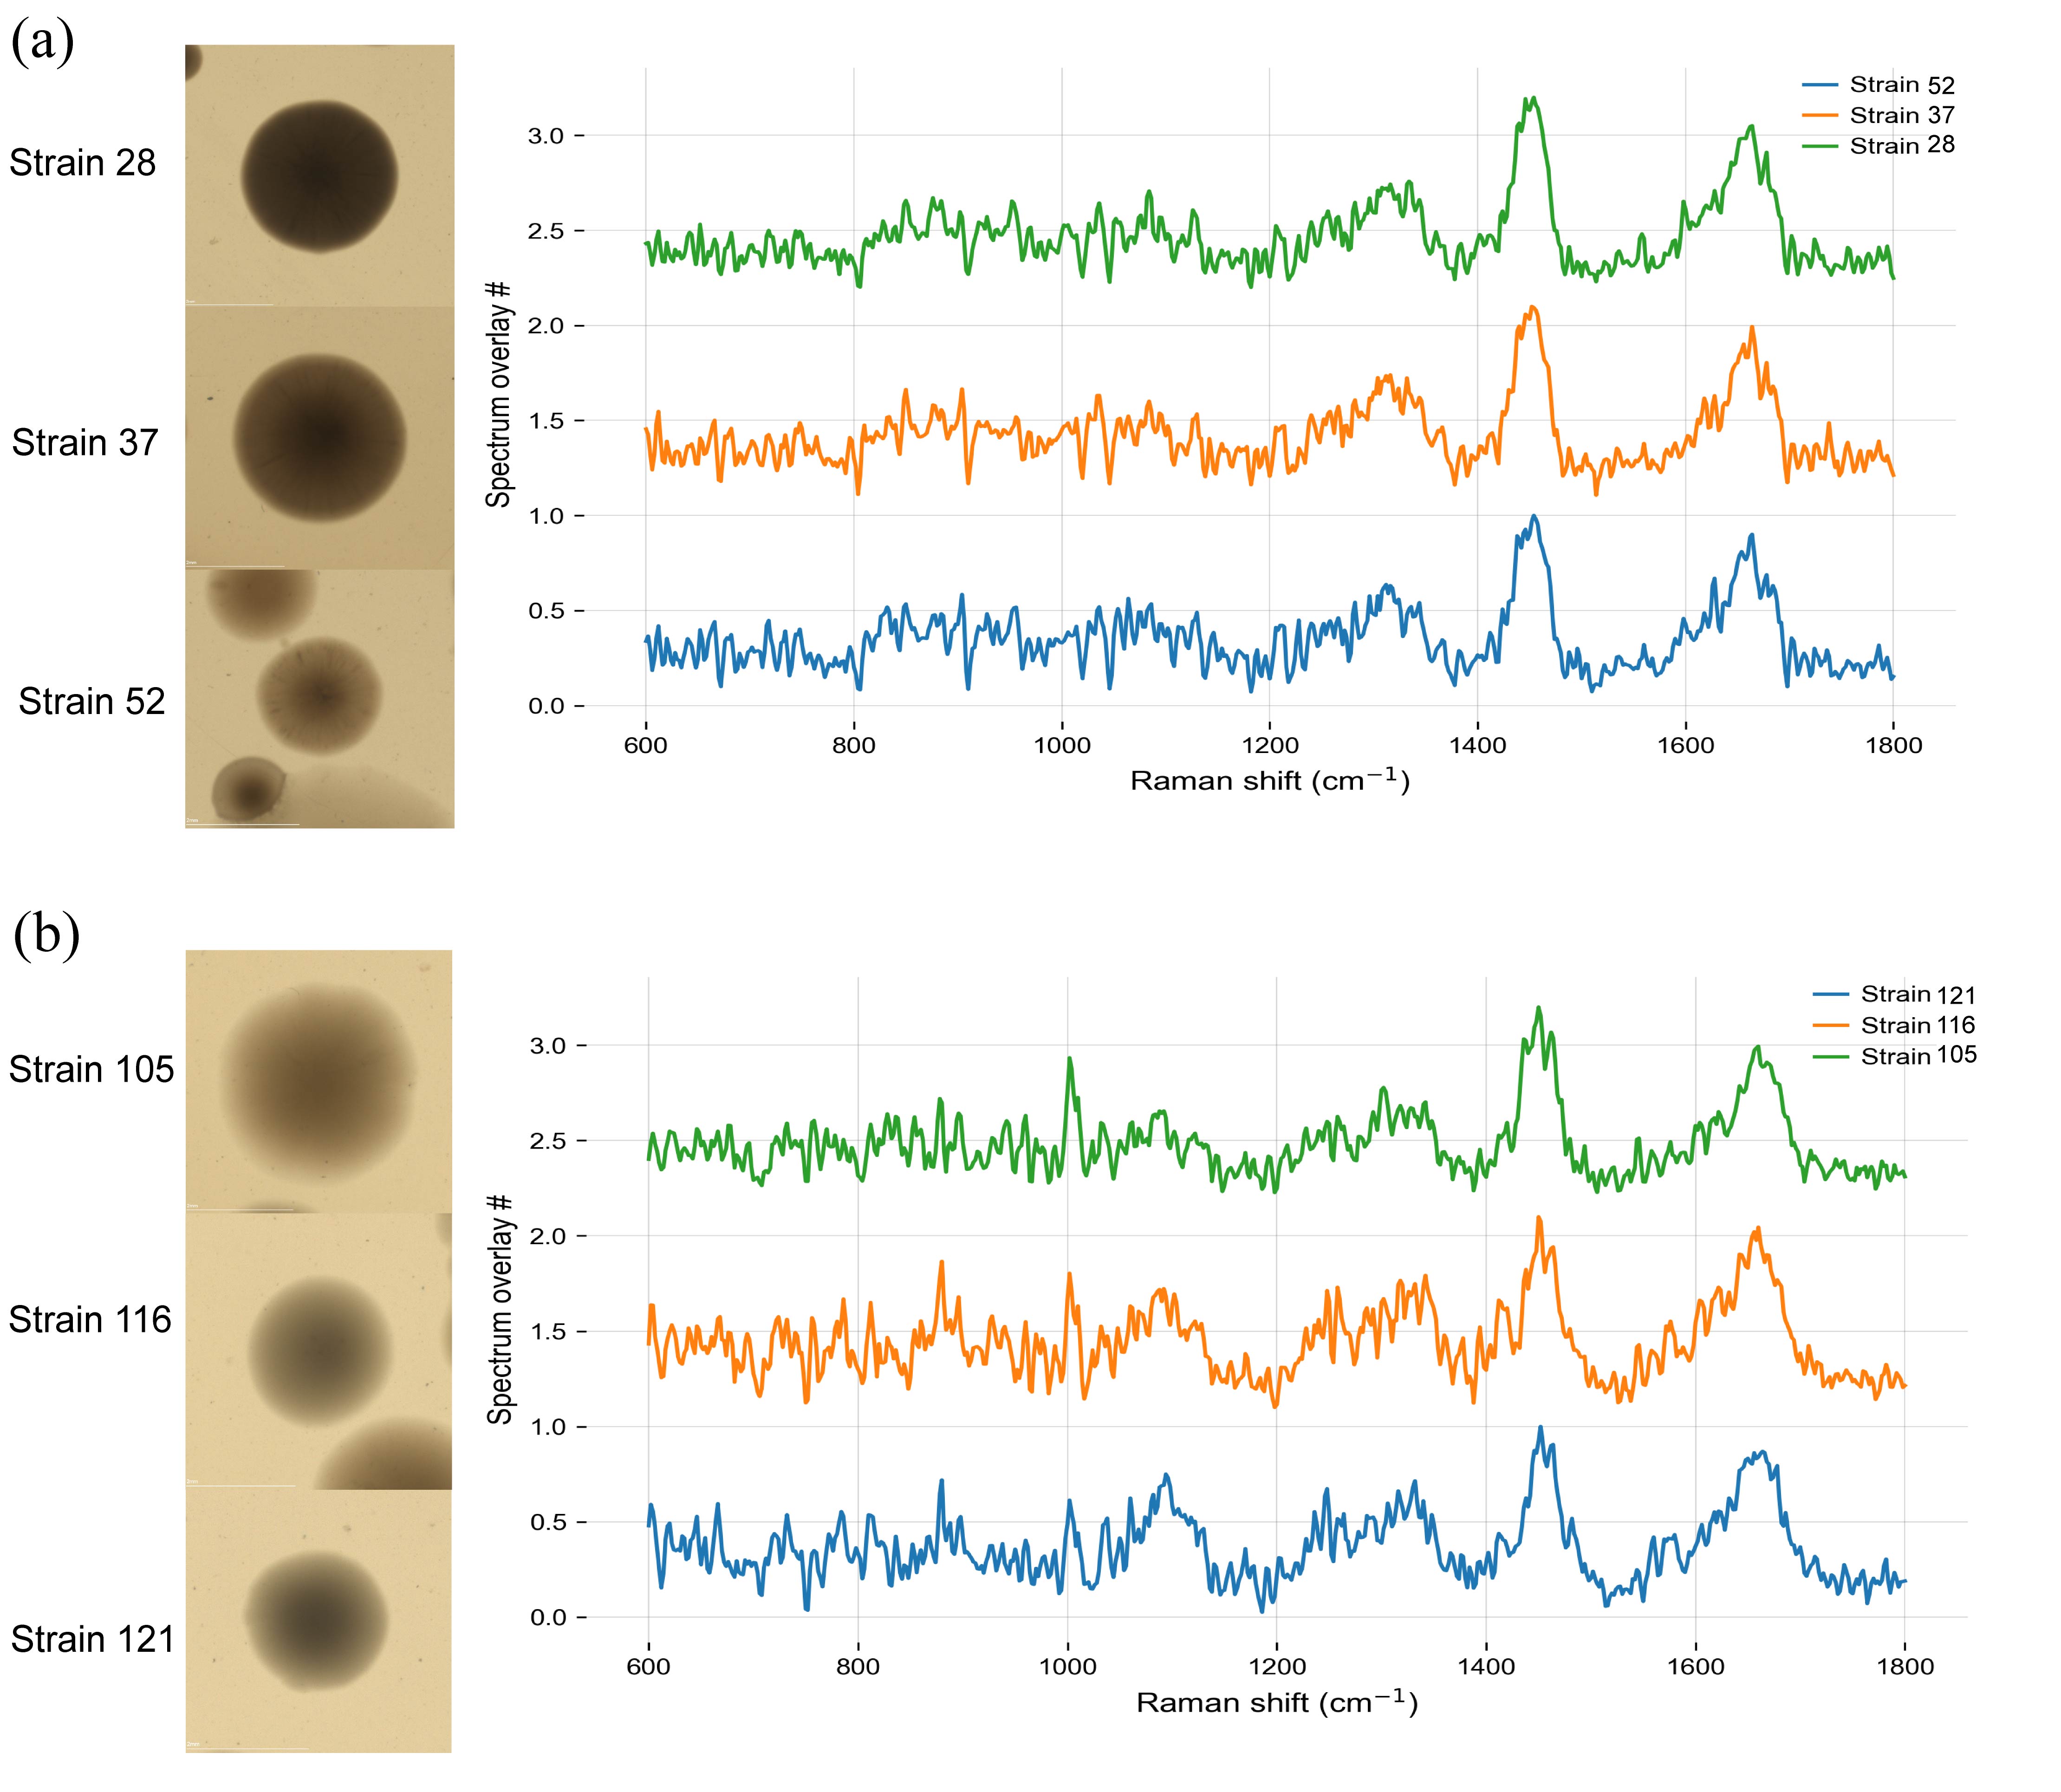


Fig. S2 Strains within the same species exhibiting significant phenotypic differences from the same fecal sample. a shows *Bacteroides stercoris*, b shows *Bacteroides fragilis*.


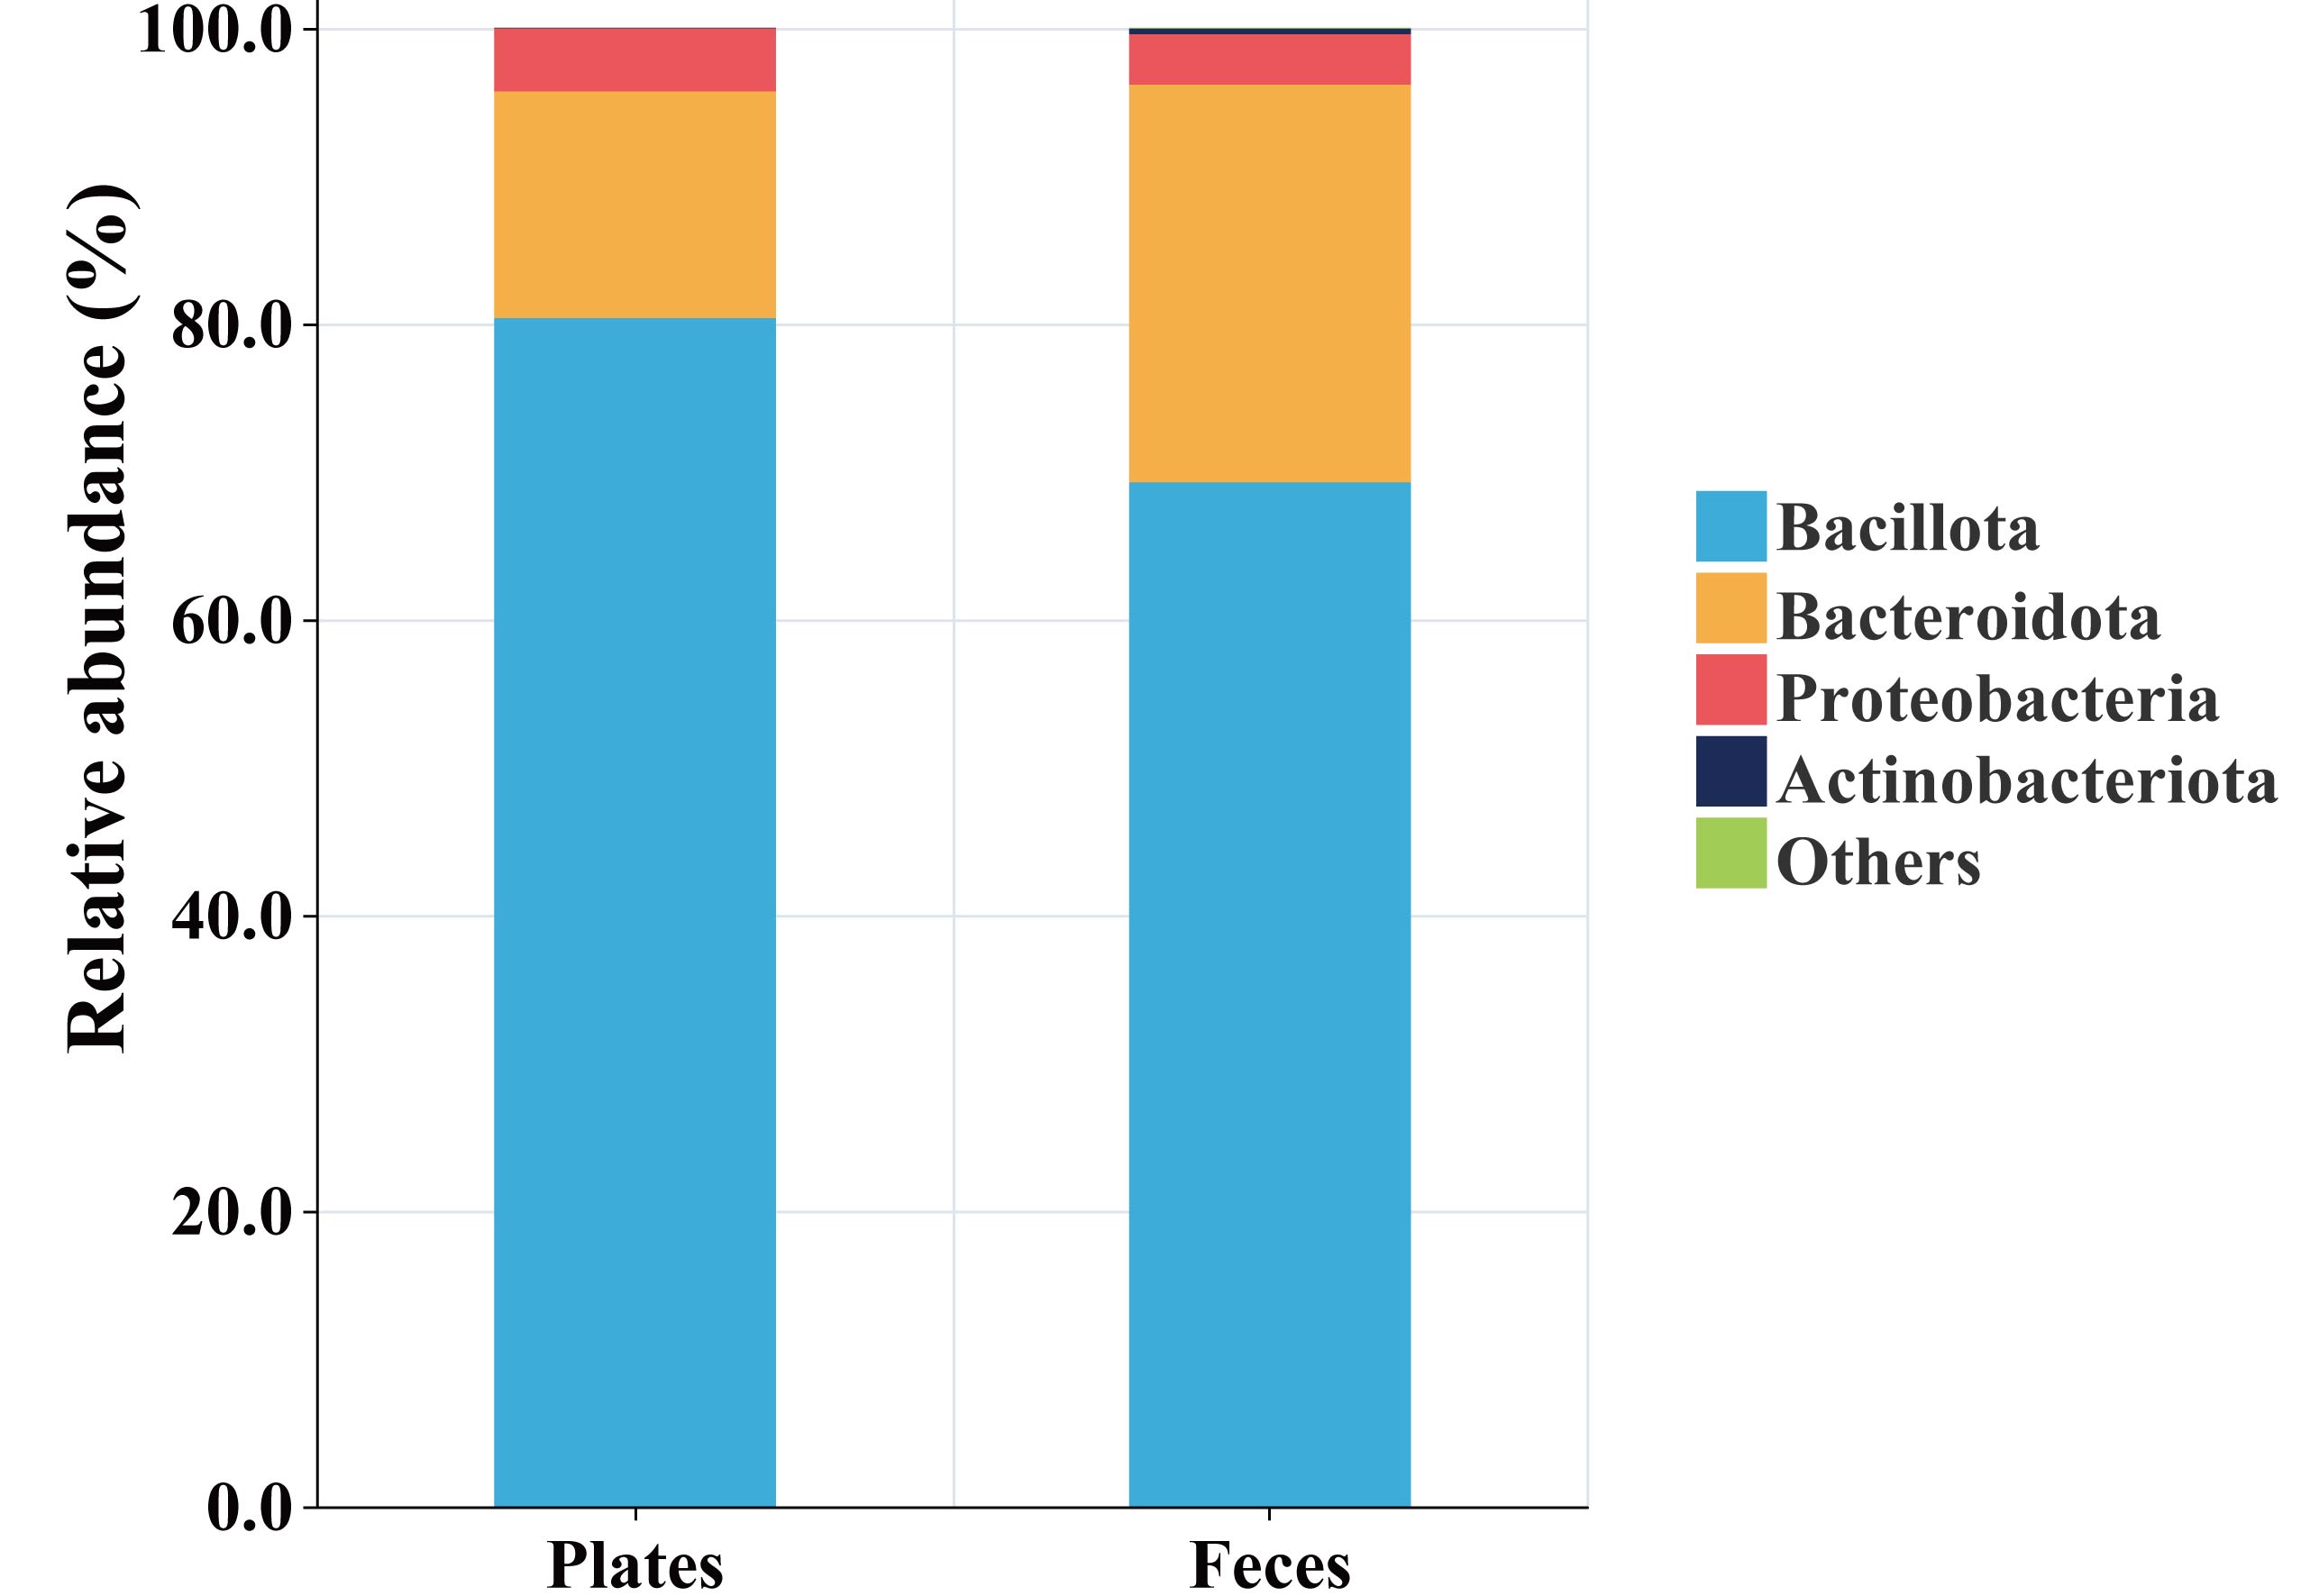


Fig. S3 Bar chart of the Phylum by relative abundance.


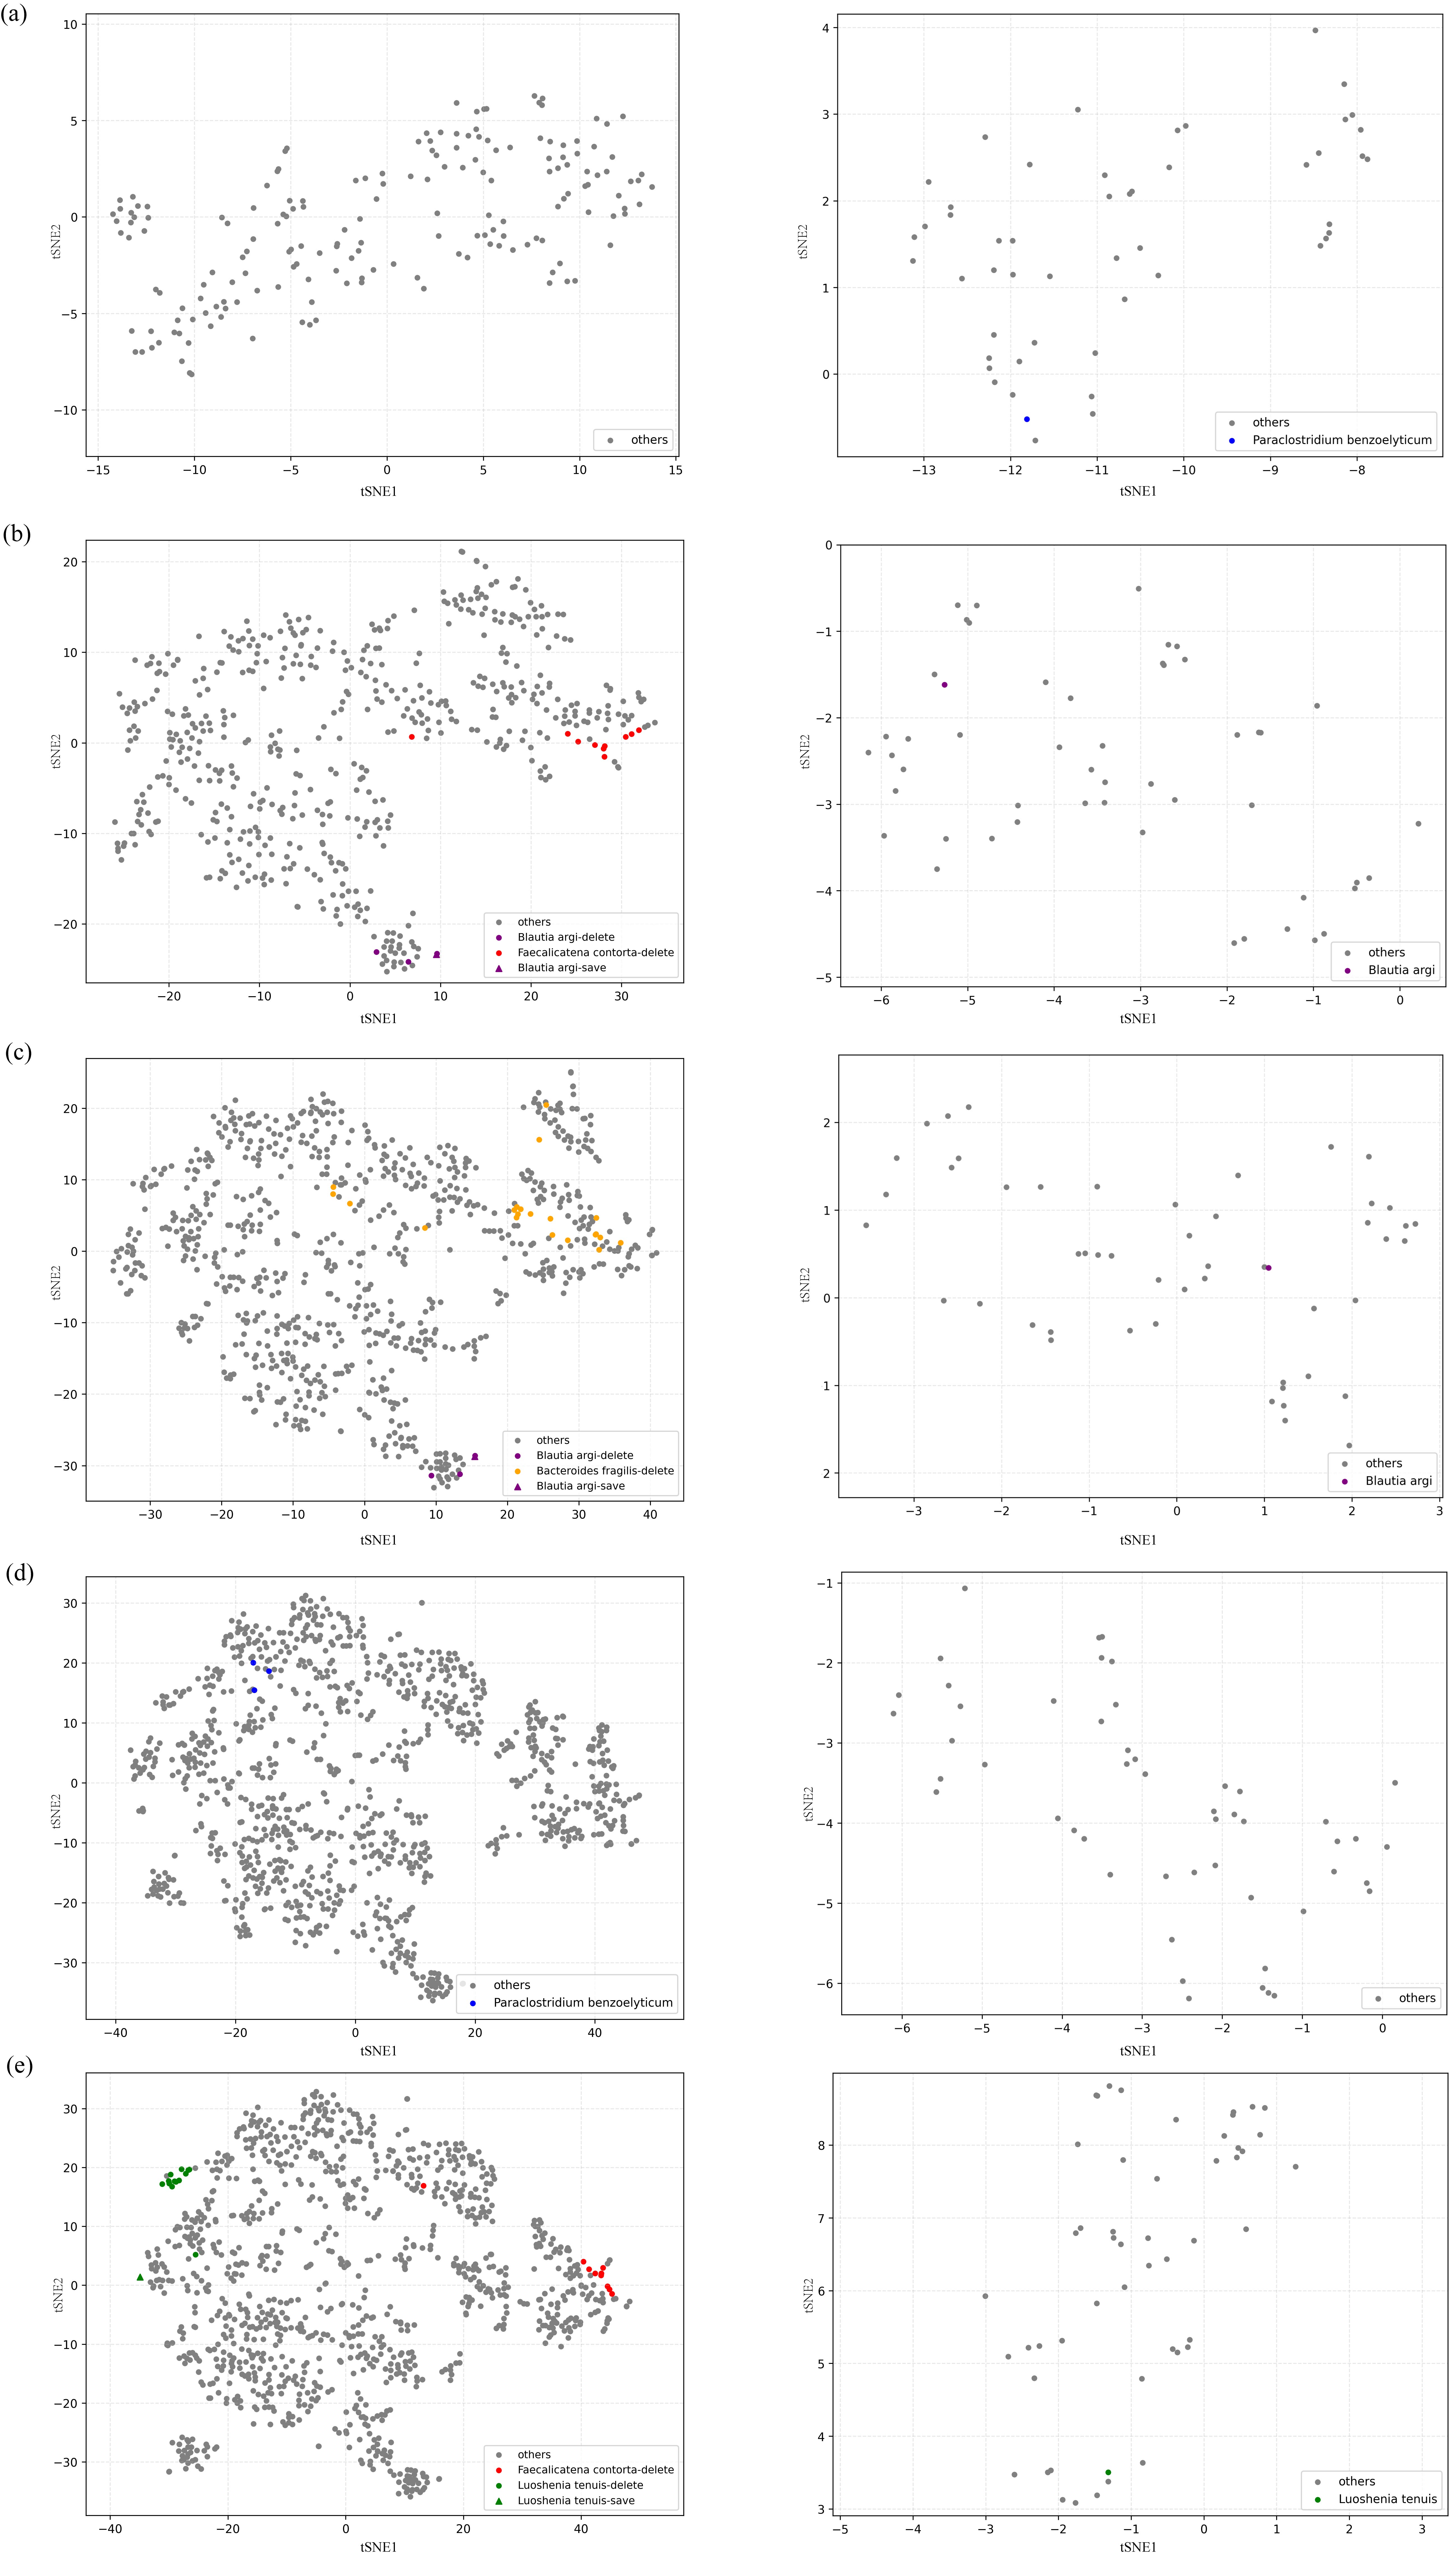


Fig. S4 Distribution of lost Species colonies during dimensionality reduction for five samples in Table S4. (a-e) t-SNE projections showing the distribution of colonies from samples with incomplete coverage (samples 3, 5, 6, 7, 8). For each sample, the left panel shows the projection based on colony image features, and the right panel shows the projection based on Raman spectral features. Colonies of species that were not successfully isolated are highlighted.


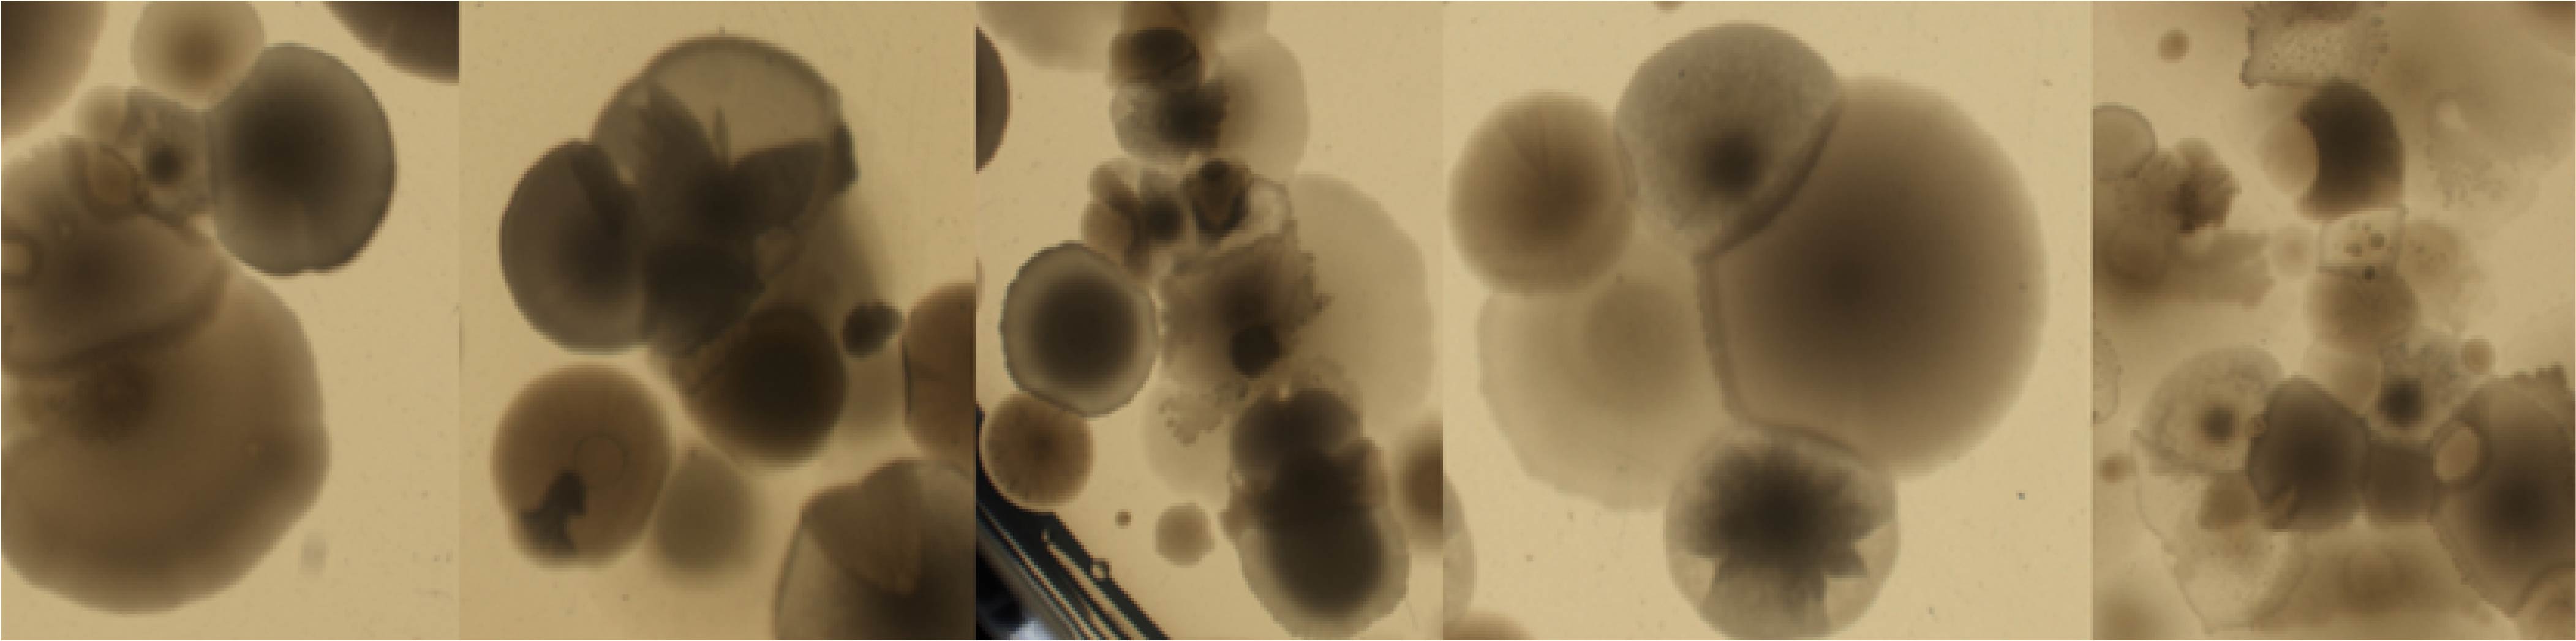


Fig. S5 Adherent colonies within plates.
